# Supplementary material
Source: publisher site journal article supplement (https://www.dovepress.com/article/416493)
Supplement: Supplementary file 1 [file get_supplementary_file.php]

Supplementary Figure S1: KEGG and GO enrichment plot of GSE45291

### KEGG pathway enrichment

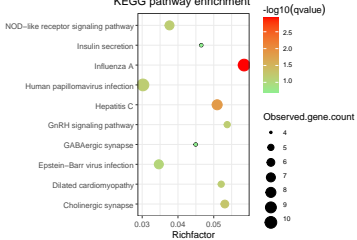

### Gene ontology enrichment

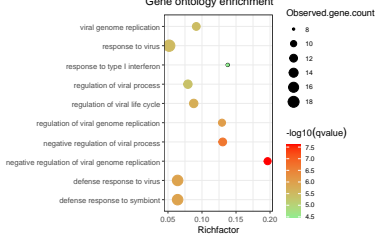

Supplementary Figure S2: KEGG and GO enrichment plot of GSE121239

KEGG pathway enrichment

Gene ontology enrichment

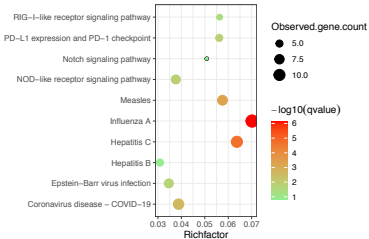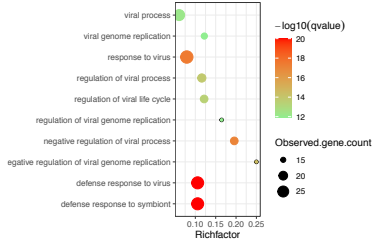

Supplementary Figure S3: The proportions of CD4(+) T cell subsets in SLE patients and HCs

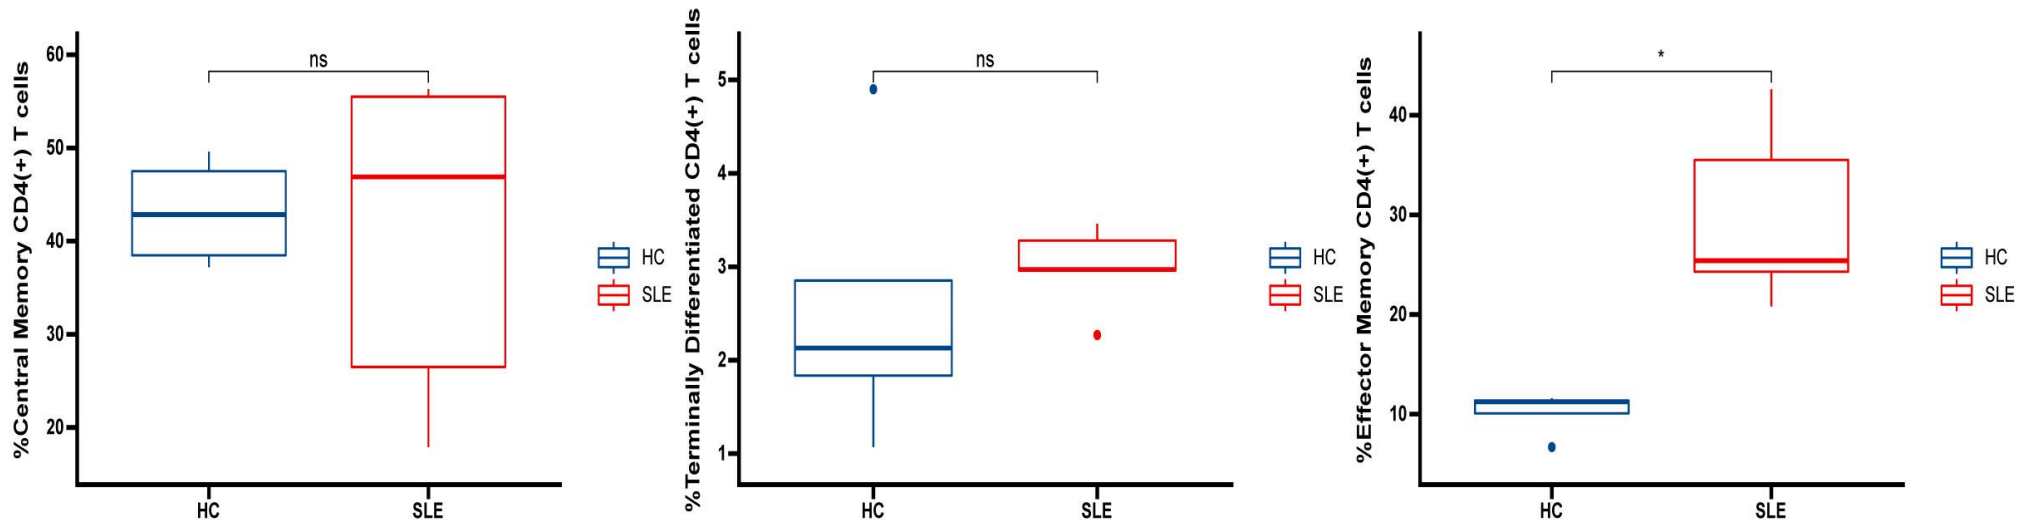

ns: no significance, \*P < 0.05 by Student' t-test.

**Supplementary Table S1. Basic information for the human subjects**

| NUMBER           | SEX   | AGE | SLEDAI score |
|------------------|-------|-----|--------------|
| SLE1             | women | 34  | 4            |
| SLE2             | women | 19  | 4            |
| SLE3             | women | 38  | 4            |
| SLE4             | women | 22  | 4            |
| SLE5             | women | 42  | 5            |
| SLE6             | women | 58  | 6            |
| SLE7             | women | 56  | 6            |
| SLE8             | women | 35  | 6            |
| SLE9             | women | 52  | 6            |
| SLE10            | women | 50  | 6            |
| SLE11            | women | 22  | 7            |
| SLE12            | women | 48  | 7            |
| SLE13            | women | 16  | 7            |
| SLE14            | women | 34  | 8            |
| SLE15            | women | 43  | 9            |
| SLE16            | women | 32  | 9            |
| SLE17            | women | 34  | 9            |
| SLE18            | women | 32  | 9            |
| SLE19            | women | 56  | 10           |
| SLE20            | women | 41  | 10           |
| SLE21            | women | 18  | 10           |
| SLE22            | women | 41  | 10           |
| SLE23            | women | 23  | 10           |
| SLE24            | women | 40  | 10           |
| SLE25            | women | 52  | 11           |
| SLE26            | women | 34  | 11           |
| SLE27            | women | 57  | 12           |
| SLE28            | women | 48  | 12           |
| SLE29            | women | 35  | 13           |
| SLE30            | women | 18  | 14           |
| healthy control1 | women | 25  |              |
| healthy control2 | women | 32  |              |
| healthy control3 | women | 30  |              |
| healthy control4 | women | 27  |              |
| healthy control5 | women | 27  |              |
| healthy control6 | women | 36  |              |
| healthy control7 | women | 43  |              |

**Supplementary Table S2. Differential expression profiles in TRIM5-lower and TRIM5-higher groups**

|          | logFC    | AveExpr  | t        | P.Value  | adj. P.ValB | Index       |
|----------|----------|----------|----------|----------|-------------|-------------|
| rsad2    | 4.971345 | 9.365531 | 32.17957 | 3.49E-54 | 6.03E-50    | 112.5626 Up |
| herc5    | 3.962705 | 8.828937 | 31.22323 | 5.28E-53 | 3.04E-49    | 109.9272 Up |
| ifi44    | 4.214755 | 9.227789 | 31.27449 | 4.56E-53 | 3.04E-49    | 110.0702 Up |
| ifit5    | 2.839566 | 8.589769 | 31.05428 | 8.60E-53 | 3.72E-49    | 109.4541 Up |
| xaf1     | 2.97285  | 7.996065 | 30.96388 | 1.12E-52 | 3.86E-49    | 109.2001 up |
| cmpk2    | 4.319945 | 8.608415 | 29.23204 | 1.90E-50 | 5.46E-47    | 104.204 Up  |
| epst11   | 3.788178 | 8.613102 | 29.08363 | 2.98E-50 | 7.36E-47    | 103.7641 Up |
| ddx60    | 3.269006 | 8.900666 | 28.96917 | 4.22E-50 | 9.13E-47    | 103.4235 Up |
| ifi441   | 5.402758 | 8.94662  | 28.8056  | 6.97E-50 | 1.34E-46    | 102.9349 Up |
| ifit3    | 3.504681 | 9.724524 | 28.6539  | 1.11E-49 | 1.92E-46    | 102.4795 Up |
| zcchc2   | 2.353623 | 6.98635  | 28.00261 | 8.43E-49 | 1.32E-45    | 100.5012 Up |
| trim5    | 1.372316 | 5.437804 | 27.76583 | 1.78E-48 | 2.56E-45    | 99.77252 Up |
| oas2     | 2.561535 | 6.63792  | 27.20886 | 1.05E-47 | 1.39E-44    | 98.03789 Up |
| oas1     | 3.499501 | 8.685817 | 27.04591 | 1.77E-47 | 2.18E-44    | 97.52493 Up |
| isgl5    | 4.223066 | 9.298188 | 26.44417 | 1.25E-46 | 1.44E-43    | 95.60856 Up |
| ifit2    | 2.597929 | 10.11274 | 26.29321 | 2.06E-46 | 2.22E-43    | 95.12228 Up |
| ifit1    | 4.616174 | 9.175892 | 26.11767 | 3.67E-46 | 3.73E-43    | 94.55404 Up |
| oas3     | 2.399768 | 5.950923 | 25.613   | 1.97E-45 | 1.90E-42    | 92.90327 Up |
| oas1     | 3.451841 | 8.506565 | 25.44069 | 3.53E-45 | 3.21E-42    | 92.33379 Up |
| uspl8    | 4.585046 | 5.63847  | 25.39468 | 4.12E-45 | 3.56E-42    | 92.18122 Up |
| rnf213   | 1.42013  | 7.799751 | 25.06632 | 1.26E-44 | 1.03E-41    | 91.08607 Up |
| parp14   | 2.218779 | 9.070833 | 24.71801 | 4.15E-44 | 3.26E-41    | 89.91216 Up |
| shisa5   | 0.938095 | 12.32494 | 23.59103 | 2.16E-42 | 1.62E-39    | 86.02576 Up |
| ifi6     | 2.159903 | 6.932791 | 23.52951 | 2.69E-42 | 1.94E-39    | 85.80968 Up |
| parp9    | 1.869081 | 8.774181 | 23.37663 | 4.65E-42 | 3.21E-39    | 85.2708 Up  |
| lipa     | 1.342526 | 6.080131 | 23.19888 | 8.80E-42 | 5.85E-39    | 84.64103 Up |
| mx1      | 3.48178  | 9.792886 | 23.15128 | 1.05E-41 | 6.69E-39    | 84.47179 Up |
| ifil6    | 1.291119 | 10.51773 | 23.13959 | 1.09E-41 | 6.73E-39    | 84.43019 Up |
| siglec1  | 4.89373  | 7.789253 | 22.70925 | 5.21E-41 | 3.11E-38    | 82.88802 Up |
| samd91   | 2.38753  | 9.034361 | 22.37524 | 1.78E-40 | 1.03E-37    | 81.67651 Up |
| parp12   | 1.779557 | 10.30354 | 22.17827 | 3.70E-40 | 2.06E-37    | 80.95609 Up |
| ube216   | 1.438967 | 10.78001 | 21.82473 | 1.39E-39 | 7.49E-37    | 79.65167 Up |
| eif2ak2  | 1.100431 | 5.96604  | 21.17837 | 1.61E-38 | 8.44E-36    | 77.22884 Up |
| rtp4     | 3.457955 | 6.606897 | 20.74008 | 8.75E-38 | 4.45E-35    | 75.55746 Up |
| ly6e     | 3.198435 | 7.079015 | 20.68709 | 1.07E-37 | 5.31E-35    | 75.35383 Up |
| ddx601   | 1.59845  | 8.473865 | 20.63931 | 1.29E-37 | 6.22E-35    | 75.16991 Up |
| samd9    | 1.72126  | 8.90732  | 20.35643 | 3.92E-37 | 1.83E-34    | 74.07528 Up |
| stat1    | 1.479798 | 8.813508 | 20.0446  | 1.34E-36 | 6.10E-34    | 72.85724 Up |
| lamp3    | 3.477335 | 5.552895 | 19.91838 | 2.22E-36 | 9.82E-34    | 72.36077 Up |
| mx2      | 1.481607 | 10.89954 | 19.63141 | 6.98E-36 | 2.94E-33    | 71.22463 Up |
| plscr1   | 1.526555 | 6.586064 | 19.6365  | 6.84E-36 | 2.94E-33    | 71.24485 Up |
| trim6    | 3.000802 | 4.600694 | 19.35188 | 2.16E-35 | 8.88E-33    | 70.10798 Up |
| zbp1     | 2.007482 | 7.053909 | 18.96503 | 1.04E-34 | 4.20E-32    | 68.54636 Up |
| serping1 | 3.211746 | 6.271244 | 18.92273 | 1.24E-34 | 4.88E-32    | 68.37445 Up |
| tnfsf13b | 1.300932 | 10.93069 | 18.74185 | 2.61E-34 | 1.00E-31    | 67.63679 Up |
| apol6    | 1.690096 | 7.590149 | 18.40499 | 1.06E-33 | 3.97E-31    | 66.25179 Up |
| herc6    | 0.815854 | 3.843528 | 18.33531 | 1.41E-33 | 5.20E-31    | 65.96348 Up |

|         |          |          |          |          |          |          |    |
|---------|----------|----------|----------|----------|----------|----------|----|
| trim22  | 1.667347 | 10.16291 | 18.19824 | 2.51E-33 | 9.04E-31 | 65.39455 | Up |
| chmp5   | 1.337446 | 9.348649 | 18.0753  | 4.21E-33 | 1.48E-30 | 64.88218 | Up |
| ifih1   | 1.560361 | 5.177159 | 17.88918 | 9.24E-33 | 3.19E-30 | 64.10279 | Up |
| zc3hav1 | 1.127959 | 8.32117  | 17.67944 | 2.25E-32 | 7.63E-30 | 63.21912 | Up |
| trim38  | 1.213629 | 8.561765 | 17.64893 | 2.56E-32 | 8.52E-30 | 63.09006 | Up |
| nt5c3a  | 1.566388 | 9.082432 | 17.54538 | 3.99E-32 | 1.30E-29 | 62.6513  | Up |
| sp100   | 1.071605 | 7.385677 | 17.46835 | 5.55E-32 | 1.78E-29 | 62.32397 | Up |
| ifitm1  | 1.040509 | 12.02491 | 17.43385 | 6.44E-32 | 2.02E-29 | 62.17713 | Up |
| gbp1    | 2.010425 | 7.280079 | 17.18492 | 1.88E-31 | 5.81E-29 | 61.11299 | Up |
| phf11   | 1.529986 | 7.269539 | 17.07442 | 3.04E-31 | 9.20E-29 | 60.63808 | Up |
| ddx58   | 2.133649 | 8.518871 | 16.9442  | 5.35E-31 | 1.59E-28 | 60.07632 | Up |
| dtx31   | 1.144827 | 9.919663 | 16.80549 | 9.79E-31 | 2.87E-28 | 59.47554 | Up |
| tnfsf10 | 1.318574 | 9.947771 | 16.70531 | 1.52E-30 | 4.37E-28 | 59.04011 | Up |
| sp110   | 0.929786 | 10.13835 | 16.54628 | 3.05E-30 | 8.65E-28 | 58.34616 | Up |
| ifi27   | 5.292142 | 8.541514 | 16.01494 | 3.23E-29 | 9.00E-27 | 56.00401 | Up |
| batf2   | 2.729671 | 6.051932 | 15.78277 | 9.15E-29 | 2.51E-26 | 54.96921 | Up |
| nmi     | 1.053145 | 10.50854 | 15.59716 | 2.12E-28 | 5.71E-26 | 54.13699 | Up |
| nub1    | 0.741592 | 6.434512 | 15.51266 | 3.10E-28 | 8.25E-26 | 53.75668 | Up |
| timm10  | 2.031785 | 8.040782 | 15.49165 | 3.41E-28 | 8.94E-26 | 53.66196 | Up |
| tnfaip6 | 2.076232 | 8.372289 | 15.48127 | 3.58E-28 | 9.23E-26 | 53.61514 | Up |
| acot9   | 1.063007 | 8.538548 | 15.43801 | 4.35E-28 | 1.11E-25 | 53.41991 | Up |
| ifi35   | 1.990243 | 8.36869  | 15.34383 | 6.68E-28 | 1.67E-25 | 52.99409 | Up |
| ifitm3  | 1.203478 | 12.63151 | 15.09051 | 2.13E-27 | 5.25E-25 | 51.84318 | Up |
| tdrd7   | 1.492464 | 8.127384 | 14.9958  | 3.29E-27 | 8.00E-25 | 51.41084 | Up |
| spats21 | 1.055761 | 3.376732 | 14.81122 | 7.70E-27 | 1.85E-24 | 50.56506 | Up |
| cysltrl | 1.018389 | 6.063449 | 14.72017 | 1.17E-26 | 2.78E-24 | 50.14627 | Up |
| tor1b   | 1.467606 | 8.913916 | 14.47134 | 3.73E-26 | 8.71E-24 | 48.99674 | Up |
| trafd1  | 0.991357 | 8.521617 | 14.43763 | 4.36E-26 | 1.01E-23 | 48.84046 | Up |
| lap3    | 1.921274 | 8.815293 | 14.31758 | 7.64E-26 | 1.74E-23 | 48.2827  | Up |
| tmem123 | 1.433777 | 8.8169   | 14.29317 | 8.57E-26 | 1.92E-23 | 48.16907 | Up |
| shfl    | 1.02695  | 7.924481 | 14.02255 | 3.06E-25 | 6.69E-23 | 46.90478 | Up |
| trim69  | 0.88431  | 5.379901 | 13.98226 | 3.70E-25 | 7.99E-23 | 46.71586 | Up |
| pnpt1   | 2.128375 | 4.835567 | 13.97757 | 3.78E-25 | 8.06E-23 | 46.69382 | Up |
| cmtrl   | 1.182986 | 7.93947  | 13.86965 | 6.29E-25 | 1.33E-22 | 46.18671 | Up |
| usp25   | 0.690841 | 5.956457 | 13.63031 | 1.96E-24 | 4.08E-22 | 45.05737 | Up |
| gnb4    | 0.976311 | 6.839693 | 13.48951 | 3.83E-24 | 7.89E-22 | 44.39005 | Up |
| pml     | 0.71518  | 3.914907 | 13.31316 | 8.91E-24 | 1.77E-21 | 43.55115 | Up |
| clgalt1 | 1.205659 | 5.863999 | 13.3143  | 8.86E-24 | 1.77E-21 | 43.55658 | Up |
| mt2a    | 1.786041 | 8.994532 | 13.31576 | 8.80E-24 | 1.77E-21 | 43.56358 | Up |
| irf7    | 2.071499 | 7.887606 | 13.29383 | 9.77E-24 | 1.92E-21 | 43.459   | Up |
| caspl   | 0.745878 | 9.385882 | 13.16889 | 1.78E-23 | 3.46E-21 | 42.8624  | Up |
| smchd1  | 1.042768 | 9.277244 | 13.07522 | 2.80E-23 | 5.37E-21 | 42.41407 | Up |
| mvb12a  | 0.999272 | 5.264982 | 13.06069 | 3.00E-23 | 5.69E-21 | 42.34445 | Up |
| fam8a1  | 1.067052 | 9.013819 | 13.00771 | 3.87E-23 | 7.27E-21 | 42.09037 | Up |
| agr1    | 0.734988 | 4.505909 | 12.98152 | 4.39E-23 | 8.16E-21 | 41.96469 | Up |
| irf9    | 0.922    | 10.07772 | 12.9575  | 4.93E-23 | 9.07E-21 | 41.84936 | Up |
| acol    | 1.266805 | 5.462823 | 12.67655 | 1.92E-22 | 3.50E-20 | 40.49603 | Up |
| fbxo6   | 1.822643 | 5.565254 | 12.57073 | 3.22E-22 | 5.79E-20 | 39.98428 | Up |
| etv7    | 1.844325 | 5.275238 | 12.46983 | 5.26E-22 | 9.37E-20 | 39.4954  | Up |
| ntng2   | 1.389045 | 9.772718 | 12.41444 | 6.89E-22 | 1.22E-19 | 39.22665 | Up |
| ccr1    | 1.26429  | 8.998688 | 12.36724 | 8.68E-22 | 1.52E-19 | 38.99735 | Up |

|          |          |          |          |          |          |          |      |
|----------|----------|----------|----------|----------|----------|----------|------|
| dhx58    | 1.379711 | 5.647082 | 12.31054 | 1.14E-21 | 1.98E-19 | 38.72171 | Up   |
| stat2    | 0.593754 | 6.004302 | 12.25945 | 1.47E-21 | 2.52E-19 | 38.47307 | Up   |
| pat11    | 0.600048 | 4.576443 | 12.19871 | 1.98E-21 | 3.35E-19 | 38.17721 | Up   |
| trim34   | 0.813448 | 7.518122 | 12.04635 | 4.18E-21 | 7.02E-19 | 37.43366 | Up   |
| ptp4a1   | 0.611863 | 5.361408 | 11.83391 | 1.19E-20 | 1.98E-18 | 36.3938  | Up   |
| gbp7     | 1.420256 | 8.753532 | 11.74608 | 1.83E-20 | 3.02E-18 | 35.96288 | Up   |
| ceacam1  | 1.449293 | 6.46448  | 11.73064 | 1.98E-20 | 3.23E-18 | 35.88704 | Up   |
| mov10    | 0.761143 | 4.067361 | 11.69059 | 2.41E-20 | 3.90E-18 | 35.69034 | Up   |
| helz2    | 0.700693 | 4.774836 | 11.59232 | 3.92E-20 | 6.28E-18 | 35.20711 | Up   |
| galm     | 1.554697 | 7.035927 | 11.49766 | 6.27E-20 | 9.94E-18 | 34.74103 | Up   |
| mtle     | 1.028682 | 7.095848 | 11.49001 | 6.51E-20 | 1.02E-17 | 34.70331 | Up   |
| ly96     | 0.791705 | 11.49338 | 11.35394 | 1.28E-19 | 1.99E-17 | 34.03223 | Up   |
| illrn    | 0.756544 | 5.272955 | 11.30074 | 1.67E-19 | 2.57E-17 | 33.76955 | Up   |
| trim14   | 0.603776 | 4.970745 | 11.24626 | 2.18E-19 | 3.34E-17 | 33.50035 | Up   |
| rsph9    | 1.512834 | 3.503747 | 11.23122 | 2.35E-19 | 3.57E-17 | 33.42602 | Up   |
| trim21   | 0.831599 | 9.920221 | 11.16674 | 3.24E-19 | 4.87E-17 | 33.10718 | Up   |
| smtnl1   | 0.917229 | 6.834397 | 11.14889 | 3.54E-19 | 5.24E-17 | 33.01887 | Up   |
| gbp5     | 1.366494 | 9.003849 | 11.14911 | 3.54E-19 | 5.24E-17 | 33.01995 | Up   |
| mtlx     | 1.069223 | 6.583977 | 11.14233 | 3.66E-19 | 5.36E-17 | 32.98637 | Up   |
| parp11   | 0.905839 | 4.876025 | 10.94279 | 9.90E-19 | 1.43E-16 | 31.99792 | Up   |
| srgap2c  | 0.969955 | 6.166062 | 10.89272 | 1.27E-18 | 1.82E-16 | 31.74961 | Up   |
| dhrs9    | 1.597429 | 7.520422 | 10.85958 | 1.50E-18 | 2.11E-16 | 31.58517 | Up   |
| tap2     | 0.808156 | 6.199682 | 10.80845 | 1.94E-18 | 2.70E-16 | 31.3314  | Up   |
| tent5a   | 0.976506 | 8.976073 | 10.7909  | 2.11E-18 | 2.92E-16 | 31.24424 | Up   |
| dock4    | 0.714674 | 4.923101 | 10.77586 | 2.28E-18 | 3.12E-16 | 31.16956 | Up   |
| mtlh11   | 1.03317  | 7.127248 | 10.75336 | 2.55E-18 | 3.44E-16 | 31.05784 | Up   |
| gbp4     | 1.438843 | 6.310526 | 10.7469  | 2.63E-18 | 3.53E-16 | 31.02577 | Up   |
| klhdc7b  | 1.25921  | 4.090962 | 10.73897 | 2.74E-18 | 3.64E-16 | 30.98635 | Up   |
| lgals3bp | 1.636152 | 5.536507 | 10.46468 | 1.08E-17 | 1.40E-15 | 29.62249 | Up   |
| abca1    | 0.661207 | 4.911438 | 10.43307 | 1.27E-17 | 1.63E-15 | 29.46516 | Up   |
| sp140    | 1.182895 | 8.939355 | 10.3841  | 1.62E-17 | 2.07E-15 | 29.22138 | Up   |
| aim2     | 1.584243 | 8.654621 | 10.30135 | 2.45E-17 | 3.11E-15 | 28.80931 | Up   |
| ffar2    | 1.278708 | 7.154654 | 10.24457 | 3.26E-17 | 4.11E-15 | 28.52644 | Up   |
| srbdl    | 1.049782 | 6.282642 | 10.22196 | 3.65E-17 | 4.57E-15 | 28.41382 | Up   |
| isg20    | 1.000754 | 10.09411 | 10.20101 | 4.05E-17 | 5.04E-15 | 28.30943 | Up   |
| sell     | 0.694509 | 12.21137 | 10.1816  | 4.46E-17 | 5.51E-15 | 28.21272 | Up   |
| gbp3     | 1.045379 | 7.742499 | 10.12068 | 6.06E-17 | 7.43E-15 | 27.90916 | Up   |
| znf496   | 0.603024 | 3.514664 | 10.06058 | 8.19E-17 | 9.90E-15 | 27.60958 | Up   |
| dapp1    | 0.741952 | 7.678354 | 10.0616  | 8.15E-17 | 9.90E-15 | 27.6147  | Up   |
| bst2     | 0.974582 | 7.395385 | 10.05336 | 8.50E-17 | 1.02E-14 | 27.57359 | Up   |
| myd88    | 0.607819 | 10.24946 | 9.894796 | 1.88E-16 | 2.23E-14 | 26.78317 | Up   |
| cdlc     | -1.17287 | 6.670407 | -9.77176 | 3.49E-16 | 4.08E-14 | 26.16981 | Down |
| trim25   | 0.633872 | 8.142802 | 9.681938 | 5.48E-16 | 6.36E-14 | 25.72207 | Up   |
| micb     | 0.835366 | 8.514388 | 9.628932 | 7.15E-16 | 8.19E-14 | 25.45788 | Up   |
| slc25a6  | -0.85183 | 9.914302 | -9.60909 | 7.90E-16 | 8.99E-14 | 25.359   | Down |
| srgap2   | 0.922998 | 5.50379  | 9.593996 | 8.52E-16 | 9.63E-14 | 25.28378 | Up   |
| cd164    | 0.6475   | 8.644183 | 9.587607 | 8.80E-16 | 9.85E-14 | 25.25194 | Up   |
| scarb2   | 0.675881 | 4.240237 | 9.586929 | 8.83E-16 | 9.85E-14 | 25.24856 | Up   |
| apol1    | 0.952281 | 7.995688 | 9.430224 | 1.94E-15 | 2.12E-13 | 24.4679  | Up   |
| slc26a11 | -0.86531 | 6.077696 | -9.41623 | 2.08E-15 | 2.26E-13 | 24.3982  | Down |
| btn3a1   | 0.688714 | 8.726827 | 9.413997 | 2.10E-15 | 2.27E-13 | 24.3871  | Up   |

|          |          |          |          |          |          |          |      |
|----------|----------|----------|----------|----------|----------|----------|------|
| csrnpl   | 0.978956 | 5.30463  | 9.346093 | 2.96E-15 | 3.16E-13 | 24.04902 | Up   |
| elf1     | 0.76347  | 9.118146 | 9.338883 | 3.07E-15 | 3.25E-13 | 24.01313 | Up   |
| sco2     | 1.443772 | 8.742433 | 9.180184 | 6.80E-15 | 7.08E-13 | 23.22362 | Up   |
| EIF31    | -0.70424 | 11.34693 | -9.15836 | 7.58E-15 | 7.80E-13 | 23.11514 | Down |
| mtla     | 0.773806 | 6.548182 | 9.085734 | 1.09E-14 | 1.12E-12 | 22.7542  | Up   |
| gadd45b  | 0.75402  | 7.2402   | 8.987155 | 1.79E-14 | 1.81E-12 | 22.26469 | Up   |
| ndc80    | 0.814343 | 6.263108 | 8.94689  | 2.19E-14 | 2.20E-12 | 22.0649  | Up   |
| kptn     | 0.876098 | 5.474802 | 8.863345 | 3.32E-14 | 3.30E-12 | 21.65063 | Up   |
| xrn1     | 0.597945 | 7.146668 | 8.761867 | 5.51E-14 | 5.35E-12 | 21.14801 | Up   |
| trex1    | 0.833775 | 5.949012 | 8.74893  | 5.88E-14 | 5.65E-12 | 21.08399 | Up   |
| cd274    | 1.084505 | 5.964877 | 8.736605 | 6.25E-14 | 5.94E-12 | 21.023   | Up   |
| tmem140  | 0.844912 | 7.788476 | 8.67338  | 8.57E-14 | 8.10E-12 | 20.71031 | Up   |
| rbm43    | 0.624997 | 4.411631 | 8.629181 | 1.07E-13 | 9.98E-12 | 20.49189 | Up   |
| trank1   | 0.753487 | 9.49053  | 8.623557 | 1.10E-13 | 1.02E-11 | 20.46411 | Up   |
| kiaa1958 | 0.800482 | 3.765671 | 8.573446 | 1.41E-13 | 1.30E-11 | 20.21668 | Up   |
| znf684   | 1.102125 | 3.478294 | 8.559623 | 1.51E-13 | 1.39E-11 | 20.14847 | Up   |
| ap5b1    | 0.816635 | 8.664706 | 8.477544 | 2.27E-13 | 2.07E-11 | 19.74374 | Up   |
| hsh2d    | 1.033501 | 7.782749 | 8.471574 | 2.34E-13 | 2.12E-11 | 19.71433 | Up   |
| cxcl10   | 1.601465 | 3.530682 | 8.294497 | 5.64E-13 | 5.03E-11 | 18.84337 | Up   |
| prrg4    | 0.985175 | 6.631875 | 8.236265 | 7.53E-13 | 6.61E-11 | 18.55763 | Up   |
| rictor   | 0.631348 | 6.392474 | 8.225785 | 7.93E-13 | 6.88E-11 | 18.50625 | Up   |
| mobla    | 0.631756 | 7.727332 | 8.223959 | 8.00E-13 | 6.88E-11 | 18.4973  | Up   |
| slfn12   | 0.852318 | 5.8751   | 8.22414  | 8.00E-13 | 6.88E-11 | 18.49819 | Up   |
| nbn      | 0.602169 | 7.731188 | 8.149717 | 1.16E-12 | 9.79E-11 | 18.13364 | Up   |
| ppmlk    | 0.707661 | 6.577289 | 8.060457 | 1.80E-12 | 1.50E-10 | 17.69727 | Up   |
| sptlc2   | 0.756189 | 6.837643 | 8.03348  | 2.05E-12 | 1.71E-10 | 17.56557 | Up   |
| irf2     | 0.631475 | 9.530228 | 8.02817  | 2.11E-12 | 1.74E-10 | 17.53966 | Up   |
| lmnb1    | 0.730515 | 8.462525 | 7.98707  | 2.58E-12 | 2.11E-10 | 17.33922 | Up   |
| pabpc4   | -0.63779 | 7.501664 | -7.93995 | 3.25E-12 | 2.63E-10 | 17.10967 | Down |
| ampd2    | -0.77424 | 9.300661 | -7.89301 | 4.10E-12 | 3.26E-10 | 16.88133 | Down |
| map2k6   | 0.973121 | 4.874346 | 7.888962 | 4.18E-12 | 3.31E-10 | 16.86165 | Up   |
| lysmd2   | 0.776095 | 7.487515 | 7.833615 | 5.49E-12 | 4.31E-10 | 16.59281 | Up   |
| nexn     | 0.969496 | 5.79242  | 7.832227 | 5.52E-12 | 4.32E-10 | 16.58608 | Up   |
| phactr2  | 0.599427 | 5.409075 | 7.826553 | 5.68E-12 | 4.42E-10 | 16.55854 | Up   |
| rpl3     | -0.64585 | 11.80236 | -7.81425 | 6.03E-12 | 4.68E-10 | 16.49887 | Down |
| fcgr3a   | 0.684551 | 11.55642 | 7.806171 | 6.28E-12 | 4.84E-10 | 16.45967 | Up   |
| marcks   | 0.591805 | 8.882118 | 7.802653 | 6.39E-12 | 4.88E-10 | 16.44261 | Up   |
| gch1     | 0.905673 | 9.592364 | 7.800581 | 6.45E-12 | 4.91E-10 | 16.43256 | Up   |
| tmem268  | 0.930147 | 7.06072  | 7.76814  | 7.56E-12 | 5.71E-10 | 16.27534 | Up   |
| stubl    | -0.59505 | 7.366595 | -7.74699 | 8.39E-12 | 6.28E-10 | 16.17294 | Down |
| arrdc3   | 0.6686   | 8.822118 | 7.725525 | 9.32E-12 | 6.91E-10 | 16.06905 | Up   |
| rhbdf2   | 0.931661 | 6.893127 | 7.716466 | 9.74E-12 | 7.19E-10 | 16.02523 | Up   |
| ccl12    | 1.078375 | 6.166019 | 7.692218 | 1.10E-11 | 8.07E-10 | 15.90801 | Up   |
| rplp0    | -0.66291 | 11.18715 | -7.65847 | 1.29E-11 | 9.43E-10 | 15.74501 | Down |
| tymp     | 0.642029 | 5.5074   | 7.640738 | 1.41E-11 | 1.02E-09 | 15.65944 | Up   |
| napa     | 0.697539 | 5.187672 | 7.635477 | 1.45E-11 | 1.04E-09 | 15.63406 | Up   |
| tmem252  | 0.780271 | 5.267373 | 7.588974 | 1.82E-11 | 1.29E-09 | 15.40993 | Up   |
| nfil3    | 0.698833 | 9.725349 | 7.54744  | 2.22E-11 | 1.54E-09 | 15.21005 | Up   |
| tap1     | 0.650437 | 10.57792 | 7.539487 | 2.31E-11 | 1.59E-09 | 15.17181 | Up   |
| nsmccl   | -0.67164 | 7.623293 | -7.50611 | 2.72E-11 | 1.86E-09 | 15.01141 | Down |
| clec7a   | 0.59972  | 7.977226 | 7.499575 | 2.80E-11 | 1.89E-09 | 14.98006 | Up   |



|          |          |          |          |          |          |          |      |
|----------|----------|----------|----------|----------|----------|----------|------|
| illlra   | -0.62048 | 6.180456 | -7.48917 | 2.95E-11 | 1.98E-09 | 14.93013 | Down |
| tuft1    | 0.963772 | 7.108936 | 7.481293 | 3.07E-11 | 2.05E-09 | 14.89232 | Up   |
| vps51    | -0.65412 | 7.355674 | -7.45927 | 3.41E-11 | 2.26E-09 | 14.78672 | Down |
| EIF4B    | -0.59992 | 9.855845 | -7.39024 | 4.77E-11 | 3.12E-09 | 14.45623 | Down |
| acadv1   | -0.71037 | 7.572942 | -7.37405 | 5.16E-11 | 3.36E-09 | 14.37882 | Down |
| bri3bp   | -0.72055 | 6.695825 | -7.31528 | 6.85E-11 | 4.35E-09 | 14.09833 | Down |
| cenpt    | -0.61477 | 6.527979 | -7.31567 | 6.84E-11 | 4.35E-09 | 14.10016 | Down |
| znf200   | 0.704586 | 6.112733 | 7.293929 | 7.60E-11 | 4.76E-09 | 13.99659 | Up   |
| EIF2D    | -0.80743 | 6.485537 | -7.28986 | 7.75E-11 | 4.82E-09 | 13.9772  | Down |
| clec4e   | 0.945294 | 9.134784 | 7.279399 | 8.15E-11 | 5.00E-09 | 13.9274  | Up   |
| cmc2     | 0.626209 | 8.370323 | 7.261601 | 8.88E-11 | 5.40E-09 | 13.84271 | Up   |
| slc26a8  | 1.459032 | 6.307615 | 7.260254 | 8.93E-11 | 5.42E-09 | 13.8363  | Up   |
| cyb561d1 | -0.6333  | 8.559202 | -7.17071 | 1.37E-10 | 8.06E-09 | 13.41116 | Down |
| slfn5    | 0.8523   | 6.307465 | 7.148553 | 1.53E-10 | 8.87E-09 | 13.30623 | Up   |
| rbck1    | 0.667101 | 7.927253 | 7.143565 | 1.57E-10 | 9.05E-09 | 13.28262 | Up   |
| siglec10 | -0.84414 | 7.850056 | -7.12096 | 1.75E-10 | 9.93E-09 | 13.17567 | Down |
| lgals9   | 0.898992 | 8.03394  | 7.097987 | 1.95E-10 | 1.09E-08 | 13.06712 | Up   |
| clec2b   | 0.614455 | 10.28356 | 7.066717 | 2.26E-10 | 1.25E-08 | 12.91953 | Up   |
| mtlf     | 0.654201 | 7.590274 | 7.060903 | 2.33E-10 | 1.28E-08 | 12.89211 | Up   |
| otof     | 1.301356 | 3.323283 | 7.032568 | 2.66E-10 | 1.45E-08 | 12.7586  | Up   |
| lhfp12   | 0.853656 | 8.084877 | 7.019322 | 2.84E-10 | 1.54E-08 | 12.69624 | Up   |
| pmaip1   | 0.846877 | 7.501715 | 6.985513 | 3.34E-10 | 1.79E-08 | 12.53725 | Up   |
| ccl8     | 1.105682 | 2.963893 | 6.880748 | 5.49E-10 | 2.84E-08 | 12.04627 | Up   |
| septin1  | -0.71067 | 7.215831 | -6.87653 | 5.60E-10 | 2.88E-08 | 12.02657 | Down |
| impa2    | -0.73891 | 7.779592 | -6.85247 | 6.28E-10 | 3.17E-08 | 11.91416 | Down |
| gimap2   | 0.61583  | 8.968671 | 6.818027 | 7.39E-10 | 3.68E-08 | 11.75356 | Up   |
| psmb9    | 0.611216 | 10.15639 | 6.80158  | 7.99E-10 | 3.93E-08 | 11.67696 | Up   |
| tmem60   | 0.71439  | 7.45659  | 6.787624 | 8.53E-10 | 4.16E-08 | 11.61201 | Up   |
| bcl2a1   | 0.590254 | 10.76053 | 6.744457 | 1.05E-09 | 5.05E-08 | 11.41144 | Up   |
| znf419   | -0.63063 | 6.088588 | -6.71037 | 1.23E-09 | 5.83E-08 | 11.25341 | Down |
| znfx1    | 0.750549 | 8.329129 | 6.657265 | 1.58E-09 | 7.21E-08 | 11.00775 | Up   |
| ubqln1   | 0.620863 | 3.99046  | 6.624667 | 1.84E-09 | 8.25E-08 | 10.85733 | Up   |
| fbl      | -0.69825 | 8.721409 | -6.57486 | 2.32E-09 | 1.02E-07 | 10.62805 | Down |
| fcgr1a   | 0.968785 | 9.746003 | 6.542247 | 2.70E-09 | 1.16E-07 | 10.47829 | Up   |
| rpl8     | -0.63615 | 11.46934 | -6.53431 | 2.80E-09 | 1.20E-07 | 10.44188 | Down |
| cd247    | -0.75961 | 7.234058 | -6.48754 | 3.48E-09 | 1.47E-07 | 10.22775 | Down |
| tiam1    | -0.80886 | 7.190695 | -6.44987 | 4.15E-09 | 1.72E-07 | 10.05568 | Down |
| camk1d   | -0.58746 | 6.660913 | -6.40436 | 5.13E-09 | 2.08E-07 | 9.848358 | Down |
| hacl1    | -0.63672 | 7.053977 | -6.39907 | 5.25E-09 | 2.12E-07 | 9.824335 | Down |
| sigirr   | -0.68032 | 8.648223 | -6.38309 | 5.66E-09 | 2.27E-07 | 9.751673 | Down |
| clec4d   | 1.121512 | 7.805779 | 6.37829  | 5.78E-09 | 2.32E-07 | 9.729887 | Up   |
| pik3r6   | -0.72991 | 6.193252 | -6.33664 | 7.01E-09 | 2.79E-07 | 9.541026 | Down |
| rnf214   | -0.79316 | 6.029726 | -6.3318  | 7.17E-09 | 2.84E-07 | 9.519101 | Down |
| ms4a4a   | 0.70704  | 4.460885 | 6.328983 | 7.26E-09 | 2.86E-07 | 9.506347 | Up   |
| rrm2     | 1.14004  | 4.820096 | 6.323121 | 7.46E-09 | 2.91E-07 | 9.479818 | Up   |
| c12orf57 | -0.70223 | 7.252835 | -6.319   | 7.60E-09 | 2.95E-07 | 9.461163 | Down |
| abcg1    | 0.58774  | 6.034076 | 6.300542 | 8.28E-09 | 3.19E-07 | 9.377736 | Up   |
| znf211   | -0.63831 | 5.395384 | -6.29078 | 8.66E-09 | 3.31E-07 | 9.333644 | Down |
| znf438   | 0.641438 | 5.105346 | 6.282656 | 8.99E-09 | 3.42E-07 | 9.296979 | Up   |
| adhfe1   | -0.64442 | 6.975171 | -6.27414 | 9.35E-09 | 3.55E-07 | 9.25858  | Down |
| fbln7    | -0.85096 | 5.791792 | -6.24903 | 1.05E-08 | 3.93E-07 | 9.145446 | Down |

|           |          |          |          |          |          |          |      |
|-----------|----------|----------|----------|----------|----------|----------|------|
| c3ar1     | 0.834326 | 8.03904  | 6.210042 | 1.25E-08 | 4.64E-07 | 8.970142 | Up   |
| rnf19b    | 0.605124 | 8.332552 | 6.191721 | 1.36E-08 | 4.99E-07 | 8.887941 | Up   |
| fcgr1b    | 0.922739 | 9.01934  | 6.174738 | 1.47E-08 | 5.35E-07 | 8.811835 | Up   |
| prpf8     | -0.63902 | 6.336068 | -6.16174 | 1.56E-08 | 5.65E-07 | 8.753658 | Down |
| cryl1     | -0.58782 | 6.216296 | -6.13381 | 1.78E-08 | 6.32E-07 | 8.628811 | Down |
| lck       | -0.69831 | 7.34811  | -6.10228 | 2.05E-08 | 7.23E-07 | 8.488159 | Down |
| ankrd22   | 1.307288 | 4.938004 | 6.101947 | 2.05E-08 | 7.23E-07 | 8.486693 | Up   |
| mterf2    | -0.64605 | 5.902408 | -6.0978  | 2.09E-08 | 7.29E-07 | 8.468208 | Down |
| ubash3a   | -0.59601 | 5.547696 | -6.03485 | 2.78E-08 | 9.36E-07 | 8.188515 | Down |
| rab33b    | 0.626412 | 7.807233 | 6.029767 | 2.85E-08 | 9.56E-07 | 8.165999 | Up   |
| amigo1    | -0.8964  | 7.140285 | -5.94776 | 4.12E-08 | 1.35E-06 | 7.803794 | Down |
| eno2      | -0.63276 | 7.441449 | -5.90131 | 5.08E-08 | 1.63E-06 | 7.599645 | Down |
| rps5      | -0.60282 | 10.72246 | -5.89243 | 5.28E-08 | 1.69E-06 | 7.560704 | Down |
| rph3a     | 1.681689 | 6.055707 | 5.868718 | 5.87E-08 | 1.86E-06 | 7.45688  | Up   |
| prss33    | -1.30302 | 6.92957  | -5.86357 | 6.01E-08 | 1.90E-06 | 7.434343 | Down |
| pdzd4     | -0.94967 | 6.610929 | -5.8607  | 6.09E-08 | 1.92E-06 | 7.421814 | Down |
| ccl2      | 0.892383 | 3.69669  | 5.850625 | 6.37E-08 | 2.00E-06 | 7.377787 | Up   |
| map4k1    | -0.58818 | 7.268941 | -5.8274  | 7.06E-08 | 2.17E-06 | 7.276411 | Down |
| abhd14b   | -0.60147 | 6.741711 | -5.73113 | 1.08E-07 | 3.18E-06 | 6.858419 | Down |
| znf662    | -1.05288 | 4.976618 | -5.71616 | 1.16E-07 | 3.39E-06 | 6.793693 | Down |
| card6     | 0.600988 | 8.392987 | 5.677083 | 1.37E-07 | 3.95E-06 | 6.625241 | Up   |
| tcn1      | 1.102537 | 5.884501 | 5.654241 | 1.52E-07 | 4.32E-06 | 6.527035 | Up   |
| cacna2d3  | -0.73276 | 5.565261 | -5.63559 | 1.65E-07 | 4.65E-06 | 6.447008 | Down |
| jak2      | 0.599054 | 5.666618 | 5.628161 | 1.70E-07 | 4.78E-06 | 6.415154 | Up   |
| ubxn11    | -0.66908 | 7.106841 | -5.60112 | 1.92E-07 | 5.28E-06 | 6.299419 | Down |
| asflb     | -0.59365 | 4.847396 | -5.57988 | 2.11E-07 | 5.71E-06 | 6.208716 | Down |
| narf      | -0.60172 | 8.644912 | -5.53041 | 2.61E-07 | 6.97E-06 | 5.998203 | Down |
| golga8a   | -0.61174 | 8.707744 | -5.52996 | 2.62E-07 | 6.97E-06 | 5.996289 | Down |
| bcs11     | -0.59949 | 6.40587  | -5.52665 | 2.66E-07 | 7.04E-06 | 5.982239 | Down |
| carns1    | -0.68582 | 4.341513 | -5.52343 | 2.69E-07 | 7.12E-06 | 5.968571 | Down |
| ldlrpl    | -0.62938 | 7.789698 | -5.49681 | 3.02E-07 | 7.82E-06 | 5.85576  | Down |
| frmd3     | 0.808869 | 5.405856 | 5.462972 | 3.50E-07 | 8.93E-06 | 5.712767 | Up   |
| pat12     | 0.636168 | 8.24775  | 5.426611 | 4.10E-07 | 1.03E-05 | 5.559652 | Up   |
| sipa112   | 0.725858 | 6.691275 | 5.397893 | 4.64E-07 | 1.15E-05 | 5.439107 | Up   |
| tgfbi     | -0.70355 | 9.439909 | -5.38576 | 4.88E-07 | 1.21E-05 | 5.388292 | Down |
| bst1      | 0.618939 | 9.149264 | 5.34272  | 5.87E-07 | 1.41E-05 | 5.208499 | Up   |
| ill18r1   | 1.173351 | 8.145027 | 5.319034 | 6.50E-07 | 1.54E-05 | 5.109897 | Up   |
| cd52      | -0.59018 | 11.37786 | -5.28279 | 7.59E-07 | 1.77E-05 | 4.959484 | Down |
| kiaa03191 | 0.600368 | 7.417979 | 5.263055 | 8.25E-07 | 1.91E-05 | 4.877828 | Up   |
| asprv1    | 0.83947  | 6.979697 | 5.249953 | 8.72E-07 | 2.00E-05 | 4.823709 | Up   |
| arfip1    | 0.611957 | 7.195317 | 5.245888 | 8.87E-07 | 2.03E-05 | 4.806934 | Up   |
| rmil      | 0.59354  | 7.649742 | 5.199027 | 1.08E-06 | 2.41E-05 | 4.614084 | Up   |
| milr1     | 0.625981 | 5.976724 | 5.196031 | 1.10E-06 | 2.43E-05 | 4.601788 | Up   |
| vps28     | -0.61035 | 9.427455 | -5.17465 | 1.20E-06 | 2.62E-05 | 4.514153 | Down |
| jup       | 0.735242 | 5.290422 | 5.174064 | 1.20E-06 | 2.62E-05 | 4.511753 | Up   |
| ptprn2    | 0.703397 | 5.222261 | 5.142722 | 1.37E-06 | 2.91E-05 | 4.38367  | Up   |
| klhdc8b   | 0.915056 | 6.378336 | 5.130018 | 1.45E-06 | 3.05E-05 | 4.331882 | Up   |
| nrn1      | 0.800727 | 4.336413 | 5.125357 | 1.48E-06 | 3.09E-05 | 4.3129   | Up   |
| sf3a3     | -0.60094 | 6.921772 | -5.07997 | 1.78E-06 | 3.67E-05 | 4.12859  | Down |
| nlrc3     | -0.58995 | 8.385472 | -5.05487 | 1.98E-06 | 4.00E-05 | 4.027051 | Down |
| cd2       | -0.63774 | 8.109979 | -5.05074 | 2.01E-06 | 4.06E-05 | 4.010374 | Down |

|          |          |          |          |          |          |          |      |
|----------|----------|----------|----------|----------|----------|----------|------|
| hdc      | -0.83509 | 5.003852 | -5.03712 | 2.13E-06 | 4.25E-05 | 3.955456 | Down |
| apobec3a | 0.959569 | 10.78059 | 5.021801 | 2.27E-06 | 4.47E-05 | 3.893765 | Up   |
| cripl    | -0.85356 | 8.612049 | -5.00458 | 2.44E-06 | 4.74E-05 | 3.824551 | Down |
| mctpl    | 0.605098 | 6.338962 | 4.960122 | 2.93E-06 | 5.51E-05 | 3.646526 | Up   |
| fanc1    | 0.724942 | 6.280352 | 4.946949 | 3.09E-06 | 5.78E-05 | 3.59396  | Up   |
| prxl2b   | -0.5969  | 5.939503 | -4.90954 | 3.61E-06 | 6.57E-05 | 3.445125 | Down |
| nap113   | -0.69897 | 3.404684 | -4.73139 | 7.43E-06 | 0.000121 | 2.74596  | Down |
| cbr3     | -0.6126  | 5.780771 | -4.72686 | 7.57E-06 | 0.000123 | 2.728384 | Down |
| znf600   | -0.80299 | 7.575684 | -4.7237  | 7.66E-06 | 0.000125 | 2.716161 | Down |
| ptgds    | -0.60156 | 5.47965  | -4.66707 | 9.61E-06 | 0.000152 | 2.49751  | Down |
| atp6v0e2 | -0.59248 | 7.162929 | -4.61376 | 1.19E-05 | 0.000181 | 2.293236 | Down |
| hla-dmb  | -0.61062 | 9.537679 | -4.61121 | 1.20E-05 | 0.000183 | 2.283491 | Down |
| pi3      | -0.91266 | 10.29849 | -4.55017 | 1.53E-05 | 0.000224 | 2.051543 | Down |
| gapt     | 0.656962 | 6.134953 | 4.467253 | 2.11E-05 | 0.000293 | 1.739701 | Up   |
| tppp3    | -0.60218 | 5.041757 | -4.39697 | 2.77E-05 | 0.000366 | 1.478341 | Down |
| gpr183   | -0.81484 | 7.505117 | -4.38478 | 2.90E-05 | 0.000382 | 1.433295 | Down |
| gstm2    | -0.91919 | 6.727486 | -4.3708  | 3.06E-05 | 0.000399 | 1.381745 | Down |
| ddhd2    | -0.61326 | 6.399102 | -4.27812 | 4.36E-05 | 0.000537 | 1.042769 | Down |
| tbcl4    | -0.6403  | 8.392388 | -4.21144 | 5.60E-05 | 0.000661 | 0.802008 | Down |
| fhit     | -0.73061 | 5.054509 | -4.11427 | 8.05E-05 | 0.00089  | 0.455842 | Down |
| trabd2a  | -0.74946 | 7.678159 | -4.11054 | 8.16E-05 | 0.000899 | 0.442642 | Down |
| adgre3   | -0.60661 | 8.694525 | -4.03722 | 0.000107 | 0.001104 | 0.185411 | Down |
| klrg1    | -0.63243 | 5.058708 | -3.96616 | 0.000138 | 0.001364 | -0.06075 | Down |
| pdzklip1 | -0.88005 | 9.478307 | -3.90255 | 0.000174 | 0.001631 | -0.27839 | Down |
| anxa3    | 0.719883 | 8.596751 | 3.79188  | 0.000257 | 0.002231 | -0.65089 | Up   |
| siglec5  | 0.638887 | 9.558956 | 3.638824 | 0.000438 | 0.003487 | -1.15281 | Up   |
| gzmk     | -0.62253 | 8.162854 | -3.50491 | 0.000688 | 0.005002 | -1.57896 | Down |
| nog      | -0.82541 | 6.770373 | -3.45156 | 0.000821 | 0.005772 | -1.7453  | Down |
| mmp8     | 0.852985 | 3.912066 | 3.345483 | 0.001162 | 0.007667 | -2.07003 | Up   |
| gprasp1  | -0.67174 | 5.431109 | -3.33718 | 0.001194 | 0.007852 | -2.09511 | Down |
| foxo3b   | -0.62303 | 6.668353 | -3.27424 | 0.001461 | 0.00924  | -2.2836  | Down |
| fgf13    | 0.610742 | 3.458791 | 3.208352 | 0.0018   | 0.010929 | -2.4778  | Up   |
| mpo      | 0.640457 | 3.931845 | 3.169467 | 0.002033 | 0.01204  | -2.59092 | Up   |
| fgfbp2   | -0.77662 | 7.684949 | -3.15421 | 0.002132 | 0.012515 | -2.635   | Down |
| slc4a1   | -0.68264 | 7.568999 | -3.10191 | 0.002506 | 0.014159 | -2.78477 | Down |
| gnly     | -0.65607 | 9.825869 | -2.9712  | 0.003724 | 0.019551 | -3.15001 | Down |
| klrf1    | -0.79776 | 7.324955 | -2.86849 | 0.005043 | 0.0247   | -3.42778 | Down |
| fam118a  | -0.71116 | 6.24803  | -2.84832 | 0.005347 | 0.025913 | -3.48136 | Down |
| zbtb16   | 0.58567  | 5.01451  | 2.818216 | 0.005833 | 0.027747 | -3.56074 | Up   |
| prosl    | -0.61278 | 6.290339 | -2.73259 | 0.007445 | 0.033684 | -3.78256 | Down |
| hp       | 0.633501 | 7.046322 | 2.687778 | 0.008441 | 0.037239 | -3.89631 | Up   |
| nfx11    | -0.70957 | 5.674428 | -2.60895 | 0.010492 | 0.044167 | -4.09245 | Down |

**Supplementary Table S3: TOP10 Differential expression in TRIM5 groups.**

|          | logFC        | AveExpr     | t            | P. Value | adj. P. Val | B           |
|----------|--------------|-------------|--------------|----------|-------------|-------------|
| rsad2    | 4.97134477   | 9.365530817 | 32.17957429  | 3.49E-54 | 6.03E-50    | 112.5626014 |
| ifi44    | 4.214755025  | 9.22778859  | 31.27448527  | 4.56E-53 | 3.04E-49    | 110.0702226 |
| herc5    | 3.962705354  | 8.828937046 | 31.2232289   | 5.28E-53 | 3.04E-49    | 109.9271636 |
| ifit5    | 2.839565767  | 8.589769383 | 31.05427982  | 8.60E-53 | 3.72E-49    | 109.4541435 |
| xaf1     | 2.972849951  | 7.996064957 | 30.96387663  | 1.12E-52 | 3.86E-49    | 109.2001007 |
| cmpk2    | 4.319944979  | 8.608414798 | 29.23204008  | 1.90E-50 | 5.46E-47    | 104.2040453 |
| epstil   | 3.788177626  | 8.613102007 | 29.08362668  | 2.98E-50 | 7.36E-47    | 103.7641219 |
| ddx60    | 3.269006228  | 8.90066634  | 28.96916976  | 4.22E-50 | 9.13E-47    | 103.4235445 |
| ifi441   | 5.402757737  | 8.946620132 | 28.80560499  | 6.97E-50 | 1.34E-46    | 102.9348545 |
| ifit3    | 3.504680805  | 9.724523726 | 28.65389694  | 1.11E-49 | 1.92E-46    | 102.4794857 |
| cd1c     | -1.172865759 | 6.670406549 | -9.771761265 | 3.49E-16 | 4.08E-14    | 26.16981191 |
| slc25a6  | -0.851834856 | 9.914302254 | -9.609091627 | 7.90E-16 | 8.99E-14    | 25.35900419 |
| slc26a11 | -0.86530511  | 6.077695741 | -9.416227542 | 2.08E-15 | 2.26E-13    | 24.3982026  |
| eif31    | -0.704239249 | 11.34693212 | -9.158363762 | 7.58E-15 | 7.80E-13    | 23.11513759 |
| pabpc4   | -0.63778735  | 7.501663705 | -7.939945453 | 3.25E-12 | 2.63E-10    | 17.10966895 |
| ampd2    | -0.774244666 | 9.300660947 | -7.893008838 | 4.10E-12 | 3.26E-10    | 16.88132534 |
| rpl3     | -0.645847088 | 11.80236361 | -7.814254911 | 6.03E-12 | 4.68E-10    | 16.49887477 |
| stub1    | -0.595048252 | 7.366594536 | -7.746992495 | 8.39E-12 | 6.28E-10    | 16.17293519 |
| rplp0    | -0.662914347 | 11.18714842 | -7.658468481 | 1.29E-11 | 9.43E-10    | 15.74500521 |
| nsmce1   | -0.671640772 | 7.623293011 | -7.506105287 | 2.72E-11 | 1.86E-09    | 15.01141254 |

Index

Up

Down

### Supplementary Table S4: KEGG and GO functional analysis of GSE45291.

| ID       | descripti | GeneRatic | BgRatio | pValue   | FDR      | qvalue      | geneID      |
|----------|-----------|-----------|---------|----------|----------|-------------|-------------|
| hsa05164 | hsa05164  | Influenza | 4月27日   | 170/8009 | 2.35E-03 | 0.159829818 | 0.143214191 |
| hsa04912 | hsa04912  | GnRH sign | 3月27日   | 93/8009  | 3.62E-03 | 0.159829818 | 0.143214191 |
| hsa05414 | hsa05414  | Dilated c | 3月27日   | 96/8009  | 3.96E-03 | 0.159829818 | 0.143214191 |
| hsa04725 | hsa04725  | Cholinerg | 3月27日   | 112/8009 | 6.10E-03 | 0.184492726 | 0.165313187 |
| hsa04913 | hsa04913  | Ovarian s | 2月27日   | 51/8009  | 1.26E-02 | 0.25576474  | 0.229175887 |
| hsa04934 | hsa04934  | Cushing s | 3月27日   | 155/8009 | 1.48E-02 | 0.25576474  | 0.229175887 |
| hsa05160 | hsa05160  | Hepatitis | 3月27日   | 155/8009 | 1.48E-02 | 0.25576474  | 0.229175887 |
| hsa04929 | hsa04929  | GnRH secr | 2月27日   | 64/8009  | 1.94E-02 | 0.258259516 | 0.231411311 |
| hsa04927 | hsa04927  | Cortisol  | 2月27日   | 65/8009  | 2.00E-02 | 0.258259516 | 0.231411311 |
| hsa04924 | hsa04924  | Renin sec | 2月27日   | 69/8009  | 2.23E-02 | 0.258259516 | 0.231411311 |
| hsa05165 | hsa05165  | Human pap | 4月27日   | 330/8009 | 2.35E-02 | 0.258259516 | 0.231411311 |
| hsa05412 | hsa05412  | Arrhythmc | 2月27日   | 77/8009  | 2.74E-02 | 0.276356037 | 0.247626549 |
| hsa04911 | hsa04911  | Insulin s | 2月27日   | 86/8009  | 3.36E-02 | 0.276356037 | 0.247626549 |
| hsa04024 | hsa04024  | cAMP sign | 3月27日   | 216/8009 | 3.52E-02 | 0.276356037 | 0.247626549 |
| hsa04727 | hsa04727  | GABAergic | 2月27日   | 89/8009  | 3.58E-02 | 0.276356037 | 0.247626549 |
| hsa05410 | hsa05410  | Hypertrop | 2月27日   | 90/8009  | 3.65E-02 | 0.276356037 | 0.247626549 |
| hsa04925 | hsa04925  | Aldosterc | 2月27日   | 98/8009  | 4.27E-02 | 0.302841095 | 0.271358267 |
| hsa04916 | hsa04916  | Melanogen | 2月27日   | 101/8009 | 4.51E-02 | 0.302841095 | 0.271358267 |
| hsa04670 | hsa04670  | Leukocyte | 2月27日   | 112/8009 | 5.42E-02 | 0.343801508 | 0.308060507 |
| hsa04726 | hsa04726  | Serotoner | 2月27日   | 115/8009 | 5.68E-02 | 0.343801508 | 0.308060507 |
| hsa04935 | hsa04935  | Growth hc | 2月27日   | 119/8009 | 6.04E-02 | 0.347855816 | 0.311693336 |
| hsa04611 | hsa04611  | Platelet  | 2月27日   | 124/8009 | 6.49E-02 | 0.356997974 | 0.319885092 |
| hsa04270 | hsa04270  | Vascular  | 2月27日   | 132/8009 | 7.24E-02 | 0.380893323 | 0.341296323 |
| hsa05162 | hsa05162  | Measles   | 2月27日   | 138/8009 | 7.82E-02 | 0.394252998 | 0.353267149 |
| hsa04514 | hsa04514  | Cell adhe | 2月27日   | 147/8009 | 8.72E-02 | 0.3997347   | 0.358178983 |
| hsa04723 | hsa04723  | Retrograd | 2月27日   | 148/8009 | 8.82E-02 | 0.3997347   | 0.358178983 |
| hsa04261 | hsa04261  | Adrenergi | 2月27日   | 149/8009 | 8.92E-02 | 0.3997347   | 0.358178983 |
| hsa04921 | hsa04921  | Oxytocin  | 2月27日   | 153/8009 | 9.33E-02 | 0.403220938 | 0.361302798 |
| hsa05310 | hsa05310  | Asthma    | 1月27日   | 31/8009  | 9.96E-02 | 0.415439827 | 0.372251432 |
| hsa04022 | hsa04022  | cGMP-PKG  | 2月27日   | 167/8009 | 1.08E-01 | 0.436080539 | 0.390746372 |
| hsa04621 | hsa04621  | NOD-like  | 2月27日   | 181/8009 | 1.24E-01 | 0.464344087 | 0.416071692 |
| hsa00513 | hsa00513  | Various t | 1月27日   | 39/8009  | 1.24E-01 | 0.464344087 | 0.416071692 |
| hsa05033 | hsa05033  | Nicotine  | 1月27日   | 40/8009  | 1.27E-01 | 0.464344087 | 0.416071692 |
| hsa04510 | hsa04510  | Focal adh | 2月27日   | 199/8009 | 1.44E-01 | 0.464779042 | 0.416461429 |
| hsa05169 | hsa05169  | Epstein-E | 2月27日   | 201/8009 | 1.46E-01 | 0.464779042 | 0.416461429 |
| hsa05030 | hsa05030  | Cocaine a | 1月27日   | 49/8009  | 1.53E-01 | 0.464779042 | 0.416461429 |
| hsa00330 | hsa00330  | Arginine  | 1月27日   | 50/8009  | 1.56E-01 | 0.464779042 | 0.416461429 |
| hsa04810 | hsa04810  | Regulatic | 2月27日   | 213/8009 | 1.61E-01 | 0.464779042 | 0.416461429 |
| hsa05132 | hsa05132  | Salmonell | 2月27日   | 214/8009 | 1.62E-01 | 0.464779042 | 0.416461429 |
| hsa04330 | hsa04330  | Notch sig | 1月27日   | 53/8009  | 1.64E-01 | 0.464779042 | 0.416461429 |
| hsa04923 | hsa04923  | Regulatic | 1月27日   | 55/8009  | 1.70E-01 | 0.464779042 | 0.416461429 |
| hsa00240 | hsa00240  | Pyrimidin | 1月27日   | 57/8009  | 1.76E-01 | 0.464779042 | 0.416461429 |
| hsa00140 | hsa00140  | Steroid h | 1月27日   | 60/8009  | 1.84E-01 | 0.464779042 | 0.416461429 |
| hsa04213 | hsa04213  | Longevity | 1月27日   | 62/8009  | 1.90E-01 | 0.464779042 | 0.416461429 |
| hsa04623 | hsa04623  | Cytosolic | 1月27日   | 63/8009  | 1.92E-01 | 0.464779042 | 0.416461429 |
| hsa05217 | hsa05217  | Basal cel | 1月27日   | 63/8009  | 1.92E-01 | 0.464779042 | 0.416461429 |
| hsa05321 | hsa05321  | Inflammat | 1月27日   | 65/8009  | 1.98E-01 | 0.464779042 | 0.416461429 |
| hsa04664 | hsa04664  | Fc epsilc | 1月27日   | 68/8009  | 2.06E-01 | 0.464779042 | 0.416461429 |
| hsa05031 | hsa05031  | Amphetami | 1月27日   | 69/8009  | 2.09E-01 | 0.464779042 | 0.416461429 |

|           |           |           |       |           |          |             |             |
|-----------|-----------|-----------|-------|-----------|----------|-------------|-------------|
| hsa05230  | hsa05230  | Central c | 1月27日 | 69/8009   | 2.09E-01 | 0.464779042 | 0.416461429 |
| hsa04622  | hsa04622  | RIG-I-lik | 1月27日 | 70/8009   | 2.11E-01 | 0.464779042 | 0.416461429 |
| hsa04917  | hsa04917  | Prolactin | 1月27日 | 70/8009   | 2.11E-01 | 0.464779042 | 0.416461429 |
| hsa04976  | hsa04976  | Bile secr | 1月27日 | 72/8009   | 2.17E-01 | 0.464779042 | 0.416461429 |
| hsa04918  | hsa04918  | Thyroid h | 1月27日 | 74/8009   | 2.22E-01 | 0.464779042 | 0.416461429 |
| hsa01230  | hsa01230  | Biosynthe | 1月27日 | 75/8009   | 2.25E-01 | 0.464779042 | 0.416461429 |
| hsa04971  | hsa04971  | Gastric a | 1月27日 | 75/8009   | 2.25E-01 | 0.464779042 | 0.416461429 |
| hsa00980  | hsa00980  | Metabolis | 1月27日 | 76/8009   | 2.27E-01 | 0.464779042 | 0.416461429 |
| hsa03320  | hsa03320  | PPAR sign | 1月27日 | 76/8009   | 2.27E-01 | 0.464779042 | 0.416461429 |
| hsa05133  | hsa05133  | Pertussis | 1月27日 | 76/8009   | 2.27E-01 | 0.464779042 | 0.416461429 |
| hsa04610  | hsa04610  | Complemen | 1月27日 | 85/8009   | 2.51E-01 | 0.464779042 | 0.416461429 |
| hsa04260  | hsa04260  | Cardiac n | 1月27日 | 86/8009   | 2.53E-01 | 0.464779042 | 0.416461429 |
| hsa04512  | hsa04512  | ECM-recep | 1月27日 | 88/8009   | 2.58E-01 | 0.464779042 | 0.416461429 |
| hsa04540  | hsa04540  | Gap junct | 1月27日 | 88/8009   | 2.58E-01 | 0.464779042 | 0.416461429 |
| hsa04211  | hsa04211  | Longevity | 1月27日 | 89/8009   | 2.61E-01 | 0.464779042 | 0.416461429 |
| hsa05235  | hsa05235  | PD-L1 exp | 1月27日 | 89/8009   | 2.61E-01 | 0.464779042 | 0.416461429 |
| hsa04060  | hsa04060  | Cytokine- | 2月27日 | 294/8009  | 2.61E-01 | 0.464779042 | 0.416461429 |
| hsa04970  | hsa04970  | Salivary  | 1月27日 | 90/8009   | 2.63E-01 | 0.464779042 | 0.416461429 |
| hsa05032  | hsa05032  | Morphine  | 1月27日 | 91/8009   | 2.66E-01 | 0.464779042 | 0.416461429 |
| hsa04658  | hsa04658  | Th1 and T | 1月27日 | 92/8009   | 2.68E-01 | 0.464779042 | 0.416461429 |
| hsa04657  | hsa04657  | IL-17 sig | 1月27日 | 94/8009   | 2.73E-01 | 0.464779042 | 0.416461429 |
| hsa04713  | hsa04713  | Circadian | 1月27日 | 97/8009   | 2.81E-01 | 0.464779042 | 0.416461429 |
| hsa01522  | hsa01522  | Endocrine | 1月27日 | 98/8009   | 2.83E-01 | 0.464779042 | 0.416461429 |
| hsa04914  | hsa04914  | Progester | 1月27日 | 99/8009   | 2.86E-01 | 0.464779042 | 0.416461429 |
| hsa04061  | hsa04061  | Viral prc | 1月27日 | 100/8009  | 2.88E-01 | 0.464779042 | 0.416461429 |
| hsa04750  | hsa04750  | Inflammat | 1月27日 | 100/8009  | 2.88E-01 | 0.464779042 | 0.416461429 |
| hsa04972  | hsa04972  | Pancreati | 1月27日 | 102/8009  | 2.93E-01 | 0.466389566 | 0.417904527 |
| hsa04620  | hsa04620  | Toll-like | 1月27日 | 104/8009  | 2.98E-01 | 0.467908191 | 0.419265278 |
| hsa04928  | hsa04928  | Parathyrc | 1月27日 | 106/8009  | 3.03E-01 | 0.469338764 | 0.420547131 |
| hsa04080  | hsa04080  | Neuroacti | 2月27日 | 340/8009  | 3.19E-01 | 0.486107102 | 0.435572262 |
| hsa04724  | hsa04724  | Glutamate | 1月27日 | 114/8009  | 3.21E-01 | 0.486107102 | 0.435572262 |
| GO:004507 | GO:004507 | negative  | 5/65  | 61/18866  | 2.13E-06 | 0.002800235 | 0.002506369 |
| GO:19039C | GO:19039C | negative  | 5/65  | 86/18866  | 1.17E-05 | 0.004194879 | 0.003754655 |
| GO:19039C | GO:19039C | regulatic | 6/65  | 157/18866 | 1.66E-05 | 0.004194879 | 0.003754655 |
| GO:006033 | GO:006033 | type I in | 5/65  | 95/18866  | 1.89E-05 | 0.004194879 | 0.003754655 |
| GO:007135 | GO:007135 | cellular  | 5/65  | 95/18866  | 1.89E-05 | 0.004194879 | 0.003754655 |
| GO:003434 | GO:003434 | response  | 5/65  | 99/18866  | 2.31E-05 | 0.004194879 | 0.003754655 |
| GO:004506 | GO:004506 | regulatic | 5/65  | 100/18866 | 2.43E-05 | 0.004194879 | 0.003754655 |
| GO:000961 | GO:000961 | response  | 8/65  | 349/18866 | 2.55E-05 | 0.004194879 | 0.003754655 |
| GO:004852 | GO:004852 | negative  | 5/65  | 104/18866 | 2.94E-05 | 0.004292016 | 0.003841598 |
| GO:001907 | GO:001907 | viral gen | 5/65  | 127/18866 | 7.64E-05 | 0.010048602 | 0.00899407  |
| GO:005079 | GO:005079 | regulatic | 6/65  | 217/18866 | 1.01E-04 | 0.01212998  | 0.010857021 |
| GO:00439C | GO:00439C | regulatic | 6/65  | 231/18866 | 1.43E-04 | 0.01565161  | 0.01400908  |
| GO:001905 | GO:001905 | viral lif | 7/65  | 341/18866 | 1.68E-04 | 0.016989517 | 0.015206582 |
| GO:00516C | GO:00516C | defense r | 6/65  | 258/18866 | 2.60E-04 | 0.024029934 | 0.021508155 |
| GO:006033 | GO:006033 | interferc | 4/65  | 91/18866  | 2.74E-04 | 0.024029934 | 0.021508155 |
| GO:009059 | GO:009059 | sensory c | 6/65  | 269/18866 | 3.25E-04 | 0.026690129 | 0.023889181 |
| GO:003953 | GO:003953 | MDA-5 sig | 2/65  | 10/18866  | 5.17E-04 | 0.039998023 | 0.035800502 |
| GO:002152 | GO:002152 | ventral s | 2/65  | 11/18866  | 6.30E-04 | 0.043643328 | 0.039063257 |
| GO:006057 | GO:006057 | cell fate | 2/65  | 11/18866  | 6.30E-04 | 0.043643328 | 0.039063257 |
| GO:006057 | GO:006057 | ventral s | 2/65  | 15/18866  | 1.19E-03 | 0.074716492 | 0.066875503 |

|                                 |           |          |             |             |
|---------------------------------|-----------|----------|-------------|-------------|
| GO:006058GO:006058cell fate2/65 | 15/18866  | 1.19E-03 | 0.074716492 | 0.066875503 |
| GO:002151GO:002151ventral s2/65 | 17/18866  | 1.54E-03 | 0.087968622 | 0.078736913 |
| GO:004244GO:004244progester2/65 | 17/18866  | 1.54E-03 | 0.087968622 | 0.078736913 |
| GO:000914GO:000914pyrimidin2/65 | 19/18866  | 1.92E-03 | 0.10419658  | 0.093261857 |
| GO:000165GO:000165eye devel6/65 | 384/18866 | 2.05E-03 | 0.10419658  | 0.093261857 |
| GO:004859GO:004859eye morph4/65 | 156/18866 | 2.06E-03 | 0.10419658  | 0.093261857 |
| GO:015006GO:015006visual sy6/65 | 388/18866 | 2.16E-03 | 0.105453233 | 0.094386633 |
| GO:004888GO:004888sensory s6/65 | 394/18866 | 2.34E-03 | 0.109789661 | 0.098267982 |
| GO:002151GO:002151spinal cc2/65 | 22/18866  | 2.58E-03 | 0.11328885  | 0.101399955 |
| GO:003206GO:003206regulatic2/65 | 22/18866  | 2.58E-03 | 0.11328885  | 0.101399955 |
| GO:000914GO:000914pyrimidin2/65 | 23/18866  | 2.82E-03 | 0.119809684 | 0.107236471 |
| GO:002151GO:002151spinal cc2/65 | 24/18866  | 3.07E-03 | 0.12633657  | 0.113078405 |
| GO:007134GO:007134cellular 4/65 | 182/18866 | 3.59E-03 | 0.141622192 | 0.126759905 |
| GO:000195GO:000195regulatic4/65 | 183/18866 | 3.66E-03 | 0.141622192 | 0.126759905 |
| GO:005166GO:005166localizat3/65 | 95/18866  | 4.31E-03 | 0.1621004   | 0.145089064 |
| GO:006075GO:006075regulatic4/65 | 196/18866 | 4.67E-03 | 0.170628678 | 0.152722357 |
| GO:006220GO:006220regulatic3/65 | 99/18866  | 4.84E-03 | 0.170773149 | 0.152851667 |
| GO:000622GO:000622pyrimidin2/65 | 31/18866  | 5.10E-03 | 0.170773149 | 0.152851667 |
| GO:003952GO:003952cytoplasm2/65 | 31/18866  | 5.10E-03 | 0.170773149 | 0.152851667 |
| GO:003434GO:003434response 4/65 | 202/18866 | 5.19E-03 | 0.170773149 | 0.152851667 |
| GO:004301GO:004301camera-ty5/65 | 332/18866 | 5.71E-03 | 0.183278667 | 0.164044816 |
| GO:004866GO:004866neuron fa2/65 | 34/18866  | 6.11E-03 | 0.191366261 | 0.171283671 |
| GO:004246GO:004246eye photc2/65 | 35/18866  | 6.46E-03 | 0.193310557 | 0.173023927 |
| GO:006033GO:006033regulatic2/65 | 35/18866  | 6.46E-03 | 0.193310557 | 0.173023927 |
| GO:006220GO:006220positive 2/65 | 37/18866  | 7.20E-03 | 0.210636037 | 0.188531215 |
| GO:000300GO:000300regionali5/65 | 355/18866 | 7.53E-03 | 0.215422882 | 0.192815713 |
| GO:000820GO:000820C21-sterc2/65 | 40/18866  | 8.38E-03 | 0.229744764 | 0.205634612 |
| GO:005128GO:005128positive 2/65 | 40/18866  | 8.38E-03 | 0.229744764 | 0.205634612 |
| GO:003089GO:003089positive 2/65 | 41/18866  | 8.79E-03 | 0.231354001 | 0.20707497  |
| GO:007252GO:007252pyrimidin2/65 | 41/18866  | 8.79E-03 | 0.231354001 | 0.20707497  |
| GO:004859GO:004859camera-ty3/65 | 125/18866 | 9.20E-03 | 0.237393463 | 0.212480631 |
| GO:004259GO:004259glucose h4/65 | 245/18866 | 1.01E-02 | 0.2547788   | 0.228041495 |
| GO:003350GO:003350carbohydr4/65 | 246/18866 | 1.03E-02 | 0.2547788   | 0.228041495 |
| GO:003509GO:003509response 2/65 | 45/18866  | 1.05E-02 | 0.256354307 | 0.229451663 |
| GO:000175GO:000175eye photc2/65 | 46/18866  | 1.10E-02 | 0.257865717 | 0.230804461 |
| GO:000622GO:000622pyrimidin2/65 | 46/18866  | 1.10E-02 | 0.257865717 | 0.230804461 |
| GO:004246GO:004246photorece2/65 | 48/18866  | 1.19E-02 | 0.274890953 | 0.246043015 |
| GO:002151GO:002151ventral s2/65 | 49/18866  | 1.24E-02 | 0.276264023 | 0.24727199  |
| GO:004851GO:004851circadian2/65 | 49/18866  | 1.24E-02 | 0.276264023 | 0.24727199  |
| GO:000196GO:000196positive 2/65 | 50/18866  | 1.29E-02 | 0.277727148 | 0.24858157  |
| GO:000762GO:000762rhythmic 2/65 | 50/18866  | 1.29E-02 | 0.277727148 | 0.24858157  |
| GO:000283GO:000283regulatic5/65 | 409/18866 | 1.33E-02 | 0.279270468 | 0.249962929 |
| GO:003517GO:003517social be2/65 | 51/18866  | 1.34E-02 | 0.279270468 | 0.249962929 |
| GO:005170GO:005170intraspec2/65 | 53/18866  | 1.44E-02 | 0.295809377 | 0.264766191 |
| GO:001052GO:001052positive 2/65 | 54/18866  | 1.49E-02 | 0.299549747 | 0.268114035 |
| GO:006004GO:006004retina de3/65 | 150/18866 | 1.50E-02 | 0.299549747 | 0.268114035 |
| GO:004311GO:004311receptor 2/65 | 56/18866  | 1.60E-02 | 0.301526572 | 0.269883406 |
| GO:005073GO:005073negative 2/65 | 56/18866  | 1.60E-02 | 0.301526572 | 0.269883406 |
| GO:002151GO:002151cell diff2/65 | 57/18866  | 1.65E-02 | 0.301526572 | 0.269883406 |
| GO:006076GO:006076positive 2/65 | 57/18866  | 1.65E-02 | 0.301526572 | 0.269883406 |
| GO:006117GO:006117regulatic2/65 | 57/18866  | 1.65E-02 | 0.301526572 | 0.269883406 |



|                                 |           |          |             |             |
|---------------------------------|-----------|----------|-------------|-------------|
| GO:004327GO:004327positive 4/65 | 284/18866 | 1.66E-02 | 0.301526572 | 0.269883406 |
| GO:006004GO:006004retina mc2/65 | 60/18866  | 1.82E-02 | 0.301526572 | 0.269883406 |
| GO:19033CGO:190330regulatic3/65 | 162/18866 | 1.84E-02 | 0.301526572 | 0.269883406 |
| GO:004557GO:004557mast cell2/65 | 61/18866  | 1.88E-02 | 0.301526572 | 0.269883406 |
| GO:004666GO:004666male sex 3/65 | 164/18866 | 1.90E-02 | 0.301526572 | 0.269883406 |
| GO:003088GO:003088regulatic2/65 | 62/18866  | 1.94E-02 | 0.301526572 | 0.269883406 |
| GO:004582GO:004582negative 2/65 | 62/18866  | 1.94E-02 | 0.301526572 | 0.269883406 |
| GO:004653GO:004653photorece2/65 | 63/18866  | 1.99E-02 | 0.301526572 | 0.269883406 |
| GO:000738GO:000738pattern s5/65 | 455/18866 | 2.02E-02 | 0.301526572 | 0.269883406 |
| GO:000687GO:000687cellular 5/65 | 456/18866 | 2.04E-02 | 0.301526572 | 0.269883406 |
| GO:003577GO:003577insulin s2/65 | 65/18866  | 2.11E-02 | 0.301526572 | 0.269883406 |
| GO:009858GO:009858cellular 2/65 | 65/18866  | 2.11E-02 | 0.301526572 | 0.269883406 |
| GO:004508GO:004508regulatic4/65 | 307/18866 | 2.14E-02 | 0.301526572 | 0.269883406 |
| GO:000301GO:000301muscle sy5/65 | 467/18866 | 2.23E-02 | 0.301526572 | 0.269883406 |
| GO:004866GO:004866neuron fa2/65 | 67/18866  | 2.24E-02 | 0.301526572 | 0.269883406 |
| GO:005507GO:005507calcium i5/65 | 468/18866 | 2.25E-02 | 0.301526572 | 0.269883406 |
| GO:000275GO:000275cytoplasm2/65 | 68/18866  | 2.30E-02 | 0.301526572 | 0.269883406 |
| GO:004253GO:004253positive 2/65 | 71/18866  | 2.49E-02 | 0.301526572 | 0.269883406 |
| GO:00072CGO:000720positive 4/65 | 322/18866 | 2.50E-02 | 0.301526572 | 0.269883406 |
| GO:00034CGO:000340neural re2/65 | 72/18866  | 2.56E-02 | 0.301526572 | 0.269883406 |
| GO:190442GO:190442positive 2/65 | 72/18866  | 2.56E-02 | 0.301526572 | 0.269883406 |
| GO:000741GO:000741synapse a3/65 | 184/18866 | 2.56E-02 | 0.301526572 | 0.269883406 |
| GO:003412GO:003412regulatic2/65 | 74/18866  | 2.69E-02 | 0.301526572 | 0.269883406 |
| GO:00725CGO:007250cellular 5/65 | 492/18866 | 2.72E-02 | 0.301526572 | 0.269883406 |
| GO:002195GO:002195central n3/65 | 192/18866 | 2.86E-02 | 0.301526572 | 0.269883406 |
| GO:000742GO:000742periphera2/65 | 77/18866  | 2.90E-02 | 0.301526572 | 0.269883406 |
| GO:000762GO:000762locomotor3/65 | 198/18866 | 3.09E-02 | 0.301526572 | 0.269883406 |
| GO:20003CGO:200030regulatic2/65 | 80/18866  | 3.11E-02 | 0.301526572 | 0.269883406 |
| GO:000196GO:000196negative 2/65 | 81/18866  | 3.18E-02 | 0.301526572 | 0.269883406 |
| GO:005127GO:005127regulatic2/65 | 81/18866  | 3.18E-02 | 0.301526572 | 0.269883406 |
| GO:000222GO:000222pattern r3/65 | 201/18866 | 3.21E-02 | 0.301526572 | 0.269883406 |
| GO:000914GO:000914nucleosid2/65 | 82/18866  | 3.25E-02 | 0.301526572 | 0.269883406 |
| GO:002195GO:002195central n2/65 | 82/18866  | 3.25E-02 | 0.301526572 | 0.269883406 |
| GO:00507CGO:005070regulatic4/65 | 352/18866 | 3.31E-02 | 0.301526572 | 0.269883406 |
| GO:000208GO:000208lens deve2/65 | 83/18866  | 3.33E-02 | 0.301526572 | 0.269883406 |
| GO:000184GO:000184neural pll/65 | 10/18866  | 3.39E-02 | 0.301526572 | 0.269883406 |
| GO:000617GO:000617cAMP bios1/65 | 10/18866  | 3.39E-02 | 0.301526572 | 0.269883406 |
| GO:000622GO:000622UTP biosyl/65 | 10/18866  | 3.39E-02 | 0.301526572 | 0.269883406 |
| GO:000656GO:000656proline n1/65 | 10/18866  | 3.39E-02 | 0.301526572 | 0.269883406 |
| GO:000913GO:000913nucleosid1/65 | 10/18866  | 3.39E-02 | 0.301526572 | 0.269883406 |
| GO:001569GO:001569ammonium 1/65 | 10/18866  | 3.39E-02 | 0.301526572 | 0.269883406 |
| GO:002156GO:002156vestibulc1/65 | 10/18866  | 3.39E-02 | 0.301526572 | 0.269883406 |
| GO:003064GO:003064aminoglyc1/65 | 10/18866  | 3.39E-02 | 0.301526572 | 0.269883406 |
| GO:003415GO:003415toll-like1/65 | 10/18866  | 3.39E-02 | 0.301526572 | 0.269883406 |
| GO:003416GO:003416regulatic1/65 | 10/18866  | 3.39E-02 | 0.301526572 | 0.269883406 |
| GO:006114GO:006114lung secr1/65 | 10/18866  | 3.39E-02 | 0.301526572 | 0.269883406 |
| GO:007131GO:007131cellular 1/65 | 10/18866  | 3.39E-02 | 0.301526572 | 0.269883406 |
| GO:007248GO:007248ammonium 1/65 | 10/18866  | 3.39E-02 | 0.301526572 | 0.269883406 |
| GO:009727GO:009727complemen1/65 | 10/18866  | 3.39E-02 | 0.301526572 | 0.269883406 |
| GO:20001CGO:200010regulatic1/65 | 10/18866  | 3.39E-02 | 0.301526572 | 0.269883406 |
| GO:005148GO:005148regulatic4/65 | 357/18866 | 3.46E-02 | 0.301526572 | 0.269883406 |

|                                  |           |          |             |             |
|----------------------------------|-----------|----------|-------------|-------------|
| GO:007252GO:007252pyrimidin2/65  | 85/18866  | 3.47E-02 | 0.301526572 | 0.269883406 |
| GO:000961GO:000961response 3/65  | 209/18866 | 3.55E-02 | 0.301526572 | 0.269883406 |
| GO:00425CGO:00425Cregulatic2/65  | 86/18866  | 3.55E-02 | 0.301526572 | 0.269883406 |
| GO:000693GO:000693muscle cc4/65  | 362/18866 | 3.62E-02 | 0.301526572 | 0.269883406 |
| GO:006076GO:006076negative 2/65  | 87/18866  | 3.62E-02 | 0.301526572 | 0.269883406 |
| GO:000618GO:000618GTP biosyl/65  | 11/18866  | 3.73E-02 | 0.301526572 | 0.269883406 |
| GO:000719GO:000719adenylate1/65  | 11/18866  | 3.73E-02 | 0.301526572 | 0.269883406 |
| GO:001904GO:001904viral lat1/65  | 11/18866  | 3.73E-02 | 0.301526572 | 0.269883406 |
| GO:001953GO:001953oxalate t1/65  | 11/18866  | 3.73E-02 | 0.301526572 | 0.269883406 |
| GO:003386GO:003386regulatic1/65  | 11/18866  | 3.73E-02 | 0.301526572 | 0.269883406 |
| GO:004267GO:004267retinal c1/65  | 11/18866  | 3.73E-02 | 0.301526572 | 0.269883406 |
| GO:004605GO:004605UTP metabol/65 | 11/18866  | 3.73E-02 | 0.301526572 | 0.269883406 |
| GO:004654GO:004654retinal c1/65  | 11/18866  | 3.73E-02 | 0.301526572 | 0.269883406 |
| GO:006043GO:006043bronchus 1/65  | 11/18866  | 3.73E-02 | 0.301526572 | 0.269883406 |
| GO:190247GO:190247positive 1/65  | 11/18866  | 3.73E-02 | 0.301526572 | 0.269883406 |
| GO:190432GO:190432response 1/65  | 11/18866  | 3.73E-02 | 0.301526572 | 0.269883406 |
| GO:190432GO:190432cellular 1/65  | 11/18866  | 3.73E-02 | 0.301526572 | 0.269883406 |
| GO:190538GO:190538protein 11/65  | 11/18866  | 3.73E-02 | 0.301526572 | 0.269883406 |
| GO:200055GO:200055regulatic1/65  | 11/18866  | 3.73E-02 | 0.301526572 | 0.269883406 |
| GO:000726GO:000726tyrosine 2/65  | 89/18866  | 3.78E-02 | 0.301526572 | 0.269883406 |
| GO:004642GO:004642positive 2/65  | 90/18866  | 3.86E-02 | 0.301526572 | 0.269883406 |
| GO:000184GO:000184neural tu2/65  | 91/18866  | 3.93E-02 | 0.301526572 | 0.269883406 |
| GO:00076CGO:00076Cvisual pe3/65  | 218/18866 | 3.94E-02 | 0.301526572 | 0.269883406 |
| GO:000995GO:000995anterior/3/65  | 219/18866 | 3.98E-02 | 0.301526572 | 0.269883406 |
| GO:000995GO:000995dorsal/ve2/65  | 92/18866  | 4.01E-02 | 0.301526572 | 0.269883406 |
| GO:00606CGO:00606Ctube clos2/65  | 92/18866  | 4.01E-02 | 0.301526572 | 0.269883406 |
| GO:000186GO:000186complemen1/65  | 12/18866  | 4.06E-02 | 0.301526572 | 0.269883406 |
| GO:006001GO:006001radial gl1/65  | 12/18866  | 4.06E-02 | 0.301526572 | 0.269883406 |
| GO:007107GO:007107positive 1/65  | 12/18866  | 4.06E-02 | 0.301526572 | 0.269883406 |
| GO:007134GO:007134skeletal 1/65  | 12/18866  | 4.06E-02 | 0.301526572 | 0.269883406 |
| GO:007188GO:007188macrophag1/65  | 12/18866  | 4.06E-02 | 0.301526572 | 0.269883406 |
| GO:190201GO:190201negative 1/65  | 12/18866  | 4.06E-02 | 0.301526572 | 0.269883406 |
| GO:190489GO:190489positive 2/65  | 93/18866  | 4.09E-02 | 0.301526572 | 0.269883406 |
| GO:001715GO:001715regulatic3/65  | 222/18866 | 4.12E-02 | 0.301526572 | 0.269883406 |
| GO:005095GO:005095sensory p3/65  | 222/18866 | 4.12E-02 | 0.301526572 | 0.269883406 |
| GO:000269GO:000269positive 3/65  | 223/18866 | 4.17E-02 | 0.301526572 | 0.269883406 |
| GO:000279GO:000279regulatic4/65  | 381/18866 | 4.23E-02 | 0.301526572 | 0.269883406 |
| GO:00507CGO:00507Cnegative 2/65  | 95/18866  | 4.25E-02 | 0.301526572 | 0.269883406 |
| GO:000197GO:000197G protein1/65  | 13/18866  | 4.39E-02 | 0.301526572 | 0.269883406 |
| GO:000292GO:000292negative 1/65  | 13/18866  | 4.39E-02 | 0.301526572 | 0.269883406 |
| GO:000926GO:0009262'-deoxyr1/65  | 13/18866  | 4.39E-02 | 0.301526572 | 0.269883406 |
| GO:002155GO:002155optic ner1/65  | 13/18866  | 4.39E-02 | 0.301526572 | 0.269883406 |
| GO:002179GO:002179thalamus 1/65  | 13/18866  | 4.39E-02 | 0.301526572 | 0.269883406 |
| GO:00336CGO:00336Cpositive 1/65  | 13/18866  | 4.39E-02 | 0.301526572 | 0.269883406 |
| GO:003558GO:003558G protein1/65  | 13/18866  | 4.39E-02 | 0.301526572 | 0.269883406 |
| GO:004575GO:004575negative 1/65  | 13/18866  | 4.39E-02 | 0.301526572 | 0.269883406 |
| GO:004638GO:004638deoxyribc1/65  | 13/18866  | 4.39E-02 | 0.301526572 | 0.269883406 |
| GO:004893GO:004893peripheral/65  | 13/18866  | 4.39E-02 | 0.301526572 | 0.269883406 |
| GO:004893GO:004893peripheral/65  | 13/18866  | 4.39E-02 | 0.301526572 | 0.269883406 |
| GO:005509GO:005509phospholil/65  | 13/18866  | 4.39E-02 | 0.301526572 | 0.269883406 |
| GO:006034GO:006034positive 1/65  | 13/18866  | 4.39E-02 | 0.301526572 | 0.269883406 |

|                                 |           |          |             |             |
|---------------------------------|-----------|----------|-------------|-------------|
| GO:007141GO:007141cellular 1/65 | 13/18866  | 4.39E-02 | 0.301526572 | 0.269883406 |
| GO:009017GO:009017planar cel/65 | 13/18866  | 4.39E-02 | 0.301526572 | 0.269883406 |
| GO:009749GO:009749protein 11/65 | 13/18866  | 4.39E-02 | 0.301526572 | 0.269883406 |
| GO:00421CGO:004210B cell pr2/65 | 97/18866  | 4.41E-02 | 0.301526572 | 0.269883406 |
| GO:000283GO:000283negative 2/65 | 98/18866  | 4.50E-02 | 0.301526572 | 0.269883406 |
| GO:001402GO:001402primary n2/65 | 98/18866  | 4.50E-02 | 0.301526572 | 0.269883406 |
| GO:000716GO:000716cell-matr3/65 | 230/18866 | 4.50E-02 | 0.301526572 | 0.269883406 |
| GO:00027CGO:000270positive 2/65 | 100/18866 | 4.66E-02 | 0.301526572 | 0.269883406 |
| GO:00973CGO:009730response 3/65 | 234/18866 | 4.69E-02 | 0.301526572 | 0.269883406 |
| GO:000624GO:000624CTP biosyl/65 | 14/18866  | 4.72E-02 | 0.301526572 | 0.269883406 |
| GO:000687GO:000687cellular 1/65 | 14/18866  | 4.72E-02 | 0.301526572 | 0.269883406 |
| GO:003316GO:003316histone H1/65 | 14/18866  | 4.72E-02 | 0.301526572 | 0.269883406 |
| GO:004603GO:004603CTP metab1/65 | 14/18866  | 4.72E-02 | 0.301526572 | 0.269883406 |
| GO:004694GO:004694nucleosid1/65 | 14/18866  | 4.72E-02 | 0.301526572 | 0.269883406 |
| GO:009017GO:009017regulatic1/65 | 14/18866  | 4.72E-02 | 0.301526572 | 0.269883406 |
| GO:015001GO:015001regulatic1/65 | 14/18866  | 4.72E-02 | 0.301526572 | 0.269883406 |
| GO:190107GO:190107guanosine1/65 | 14/18866  | 4.72E-02 | 0.301526572 | 0.269883406 |
| GO:00017CGO:000170cell fate2/65 | 101/18866 | 4.75E-02 | 0.301526572 | 0.269883406 |
| GO:000279GO:000279negative 2/65 | 101/18866 | 4.75E-02 | 0.301526572 | 0.269883406 |
| GO:001052GO:001052regulatic2/65 | 101/18866 | 4.75E-02 | 0.301526572 | 0.269883406 |
| GO:004263GO:004263cholester2/65 | 101/18866 | 4.75E-02 | 0.301526572 | 0.269883406 |
| GO:005509GO:005509sterol hc2/65 | 102/18866 | 4.83E-02 | 0.301526572 | 0.269883406 |
| GO:004247GO:004247inner ear2/65 | 103/18866 | 4.92E-02 | 0.301526572 | 0.269883406 |
| GO:006007GO:006007excitator2/65 | 103/18866 | 4.92E-02 | 0.301526572 | 0.269883406 |
| GO:004327GO:004327response 2/65 | 104/18866 | 5.00E-02 | 0.301526572 | 0.269883406 |
| GO:000763GO:000763mechanose1/65 | 15/18866  | 5.05E-02 | 0.301526572 | 0.269883406 |
| GO:00092CGO:000920pyrimidin1/65 | 15/18866  | 5.05E-02 | 0.301526572 | 0.269883406 |
| GO:003574GO:003574T-helper 1/65 | 15/18866  | 5.05E-02 | 0.301526572 | 0.269883406 |
| GO:004257GO:004257retinal n1/65 | 15/18866  | 5.05E-02 | 0.301526572 | 0.269883406 |
| GO:006002GO:006002convergen1/65 | 15/18866  | 5.05E-02 | 0.301526572 | 0.269883406 |
| GO:006013GO:006013prepulse 1/65 | 15/18866  | 5.05E-02 | 0.301526572 | 0.269883406 |
| GO:007057GO:007057negative 1/65 | 15/18866  | 5.05E-02 | 0.301526572 | 0.269883406 |
| GO:009017GO:009017establish1/65 | 15/18866  | 5.05E-02 | 0.301526572 | 0.269883406 |
| GO:000184GO:000184neural tu2/65 | 106/18866 | 5.17E-02 | 0.301526572 | 0.269883406 |
| GO:004692GO:004692regulatic2/65 | 106/18866 | 5.17E-02 | 0.301526572 | 0.269883406 |
| GO:00509CGO:005090neuromusc2/65 | 107/18866 | 5.26E-02 | 0.301526572 | 0.269883406 |
| GO:000722GO:000722integrin-2/65 | 108/18866 | 5.35E-02 | 0.301526572 | 0.269883406 |
| GO:001635GO:001635dendrite 3/65 | 247/18866 | 5.36E-02 | 0.301526572 | 0.269883406 |
| GO:000283GO:000283positive 1/65 | 16/18866  | 5.37E-02 | 0.301526572 | 0.269883406 |
| GO:00092CGO:000920pyrimidin1/65 | 16/18866  | 5.37E-02 | 0.301526572 | 0.269883406 |
| GO:000926GO:000926deoxyribc1/65 | 16/18866  | 5.37E-02 | 0.301526572 | 0.269883406 |
| GO:003222GO:003222regulatic1/65 | 16/18866  | 5.37E-02 | 0.301526572 | 0.269883406 |
| GO:00330CGO:003300positive 1/65 | 16/18866  | 5.37E-02 | 0.301526572 | 0.269883406 |
| GO:003303GO:003303negative 1/65 | 16/18866  | 5.37E-02 | 0.301526572 | 0.269883406 |
| GO:003411GO:003411positive 1/65 | 16/18866  | 5.37E-02 | 0.301526572 | 0.269883406 |
| GO:004248GO:004248regulatic1/65 | 16/18866  | 5.37E-02 | 0.301526572 | 0.269883406 |
| GO:004253GO:004253negative 1/65 | 16/18866  | 5.37E-02 | 0.301526572 | 0.269883406 |
| GO:00433CGO:004330positive 1/65 | 16/18866  | 5.37E-02 | 0.301526572 | 0.269883406 |
| GO:00800CGO:008000mRNA meth1/65 | 16/18866  | 5.37E-02 | 0.301526572 | 0.269883406 |
| GO:002151GO:002151spinal cc2/65 | 109/18866 | 5.44E-02 | 0.301526572 | 0.269883406 |
| GO:000914GO:000914nucleosid2/65 | 110/18866 | 5.53E-02 | 0.301526572 | 0.269883406 |

|                                  |           |          |             |             |
|----------------------------------|-----------|----------|-------------|-------------|
| GO:000908GO:000908glutamine1/65  | 17/18866  | 5.70E-02 | 0.301526572 | 0.269883406 |
| GO:003029GO:003029intestinal/65  | 17/18866  | 5.70E-02 | 0.301526572 | 0.269883406 |
| GO:00310CGO:003100response 1/65  | 17/18866  | 5.70E-02 | 0.301526572 | 0.269883406 |
| GO:004224GO:004224establish1/65  | 17/18866  | 5.70E-02 | 0.301526572 | 0.269883406 |
| GO:004453GO:004453long-chain1/65 | 17/18866  | 5.70E-02 | 0.301526572 | 0.269883406 |
| GO:004476GO:004476multi-org1/65  | 17/18866  | 5.70E-02 | 0.301526572 | 0.269883406 |
| GO:005507GO:005507copper ic1/65  | 17/18866  | 5.70E-02 | 0.301526572 | 0.269883406 |
| GO:014035GO:014035lipid imp1/65  | 17/18866  | 5.70E-02 | 0.301526572 | 0.269883406 |
| GO:190167GO:190167regulatic1/65  | 17/18866  | 5.70E-02 | 0.301526572 | 0.269883406 |
| GO:190235GO:190235sulfate t1/65  | 17/18866  | 5.70E-02 | 0.301526572 | 0.269883406 |
| GO:009956GO:009956chemical 2/65  | 112/18866 | 5.70E-02 | 0.301526572 | 0.269883406 |
| GO:00070CGO:000700plasma me2/65  | 113/18866 | 5.79E-02 | 0.301526572 | 0.269883406 |
| GO:009869GO:009869regulatic2/65  | 114/18866 | 5.89E-02 | 0.301526572 | 0.269883406 |
| GO:000681GO:000681calcium i4/65  | 426/18866 | 5.92E-02 | 0.301526572 | 0.269883406 |
| GO:000682GO:000682copper ic1/65  | 18/18866  | 6.03E-02 | 0.301526572 | 0.269883406 |
| GO:000759GO:000759blood coal/65  | 18/18866  | 6.03E-02 | 0.301526572 | 0.269883406 |
| GO:000827GO:000827sulfate t1/65  | 18/18866  | 6.03E-02 | 0.301526572 | 0.269883406 |
| GO:00092CGO:000920deoxyribc1/65  | 18/18866  | 6.03E-02 | 0.301526572 | 0.269883406 |
| GO:003419GO:003419activatic1/65  | 18/18866  | 6.03E-02 | 0.301526572 | 0.269883406 |
| GO:003537GO:003537protein ll/65  | 18/18866  | 6.03E-02 | 0.301526572 | 0.269883406 |
| GO:003599GO:003599response 1/65  | 18/18866  | 6.03E-02 | 0.301526572 | 0.269883406 |
| GO:004301GO:004301myeloid dl/65  | 18/18866  | 6.03E-02 | 0.301526572 | 0.269883406 |
| GO:004321GO:004321myelin mal/65  | 18/18866  | 6.03E-02 | 0.301526572 | 0.269883406 |
| GO:004518GO:004518regulatic1/65  | 18/18866  | 6.03E-02 | 0.301526572 | 0.269883406 |
| GO:007178GO:007178endoplasm1/65  | 18/18866  | 6.03E-02 | 0.301526572 | 0.269883406 |
| GO:190527GO:190527regulatic1/65  | 18/18866  | 6.03E-02 | 0.301526572 | 0.269883406 |
| GO:004218GO:004218cellular 3/65  | 260/18866 | 6.06E-02 | 0.301526572 | 0.269883406 |
| GO:00321CGO:003210negative 4/65  | 433/18866 | 6.21E-02 | 0.301526572 | 0.269883406 |
| GO:00508CGO:005080synapse c4/65  | 433/18866 | 6.21E-02 | 0.301526572 | 0.269883406 |
| GO:005073GO:005073regulatic3/65  | 263/18866 | 6.23E-02 | 0.301526572 | 0.269883406 |
| GO:00512CGO:005120release c2/65  | 118/18866 | 6.25E-02 | 0.301526572 | 0.269883406 |
| GO:003432GO:003432cell junc4/65  | 434/18866 | 6.25E-02 | 0.301526572 | 0.269883406 |
| GO:005128GO:005128negative 2/65  | 119/18866 | 6.35E-02 | 0.301526572 | 0.269883406 |
| GO:000921GO:000921pyrimidin1/65  | 19/18866  | 6.35E-02 | 0.301526572 | 0.269883406 |
| GO:003634GO:003634post-anal1/65  | 19/18866  | 6.35E-02 | 0.301526572 | 0.269883406 |
| GO:003953GO:003953regulatic1/65  | 19/18866  | 6.35E-02 | 0.301526572 | 0.269883406 |
| GO:004205GO:004205regulatic1/65  | 19/18866  | 6.35E-02 | 0.301526572 | 0.269883406 |
| GO:004206GO:004206regulatic1/65  | 19/18866  | 6.35E-02 | 0.301526572 | 0.269883406 |
| GO:00509CGO:005090detection1/65  | 19/18866  | 6.35E-02 | 0.301526572 | 0.269883406 |
| GO:005096GO:005096detection1/65  | 19/18866  | 6.35E-02 | 0.301526572 | 0.269883406 |
| GO:00550CGO:005500cardiac m1/65  | 19/18866  | 6.35E-02 | 0.301526572 | 0.269883406 |
| GO:009885GO:009885intestinal/65  | 19/18866  | 6.35E-02 | 0.301526572 | 0.269883406 |
| GO:000916GO:000916nucleotid3/65  | 266/18866 | 6.40E-02 | 0.301526572 | 0.269883406 |
| GO:005158GO:005158regulatic2/65  | 120/18866 | 6.44E-02 | 0.301526572 | 0.269883406 |
| GO:000761GO:000761memory 2/65    | 121/18866 | 6.53E-02 | 0.301526572 | 0.269883406 |
| GO:001607GO:001607synaptic 2/65  | 121/18866 | 6.53E-02 | 0.301526572 | 0.269883406 |
| GO:005128GO:005128regulatic2/65  | 121/18866 | 6.53E-02 | 0.301526572 | 0.269883406 |
| GO:012025GO:012025olefinic 2/65  | 121/18866 | 6.53E-02 | 0.301526572 | 0.269883406 |
| GO:003134GO:003134negative 3/65  | 269/18866 | 6.57E-02 | 0.301526572 | 0.269883406 |
| GO:190129GO:190129nucleosid3/65  | 269/18866 | 6.57E-02 | 0.301526572 | 0.269883406 |
| GO:004547GO:004547response 2/65  | 122/18866 | 6.63E-02 | 0.301526572 | 0.269883406 |

|                                 |           |          |             |             |
|---------------------------------|-----------|----------|-------------|-------------|
| GO:005192GO:005192positive 2/65 | 122/18866 | 6.63E-02 | 0.301526572 | 0.269883406 |
| GO:000272GO:000272positive 1/65 | 20/18866  | 6.67E-02 | 0.301526572 | 0.269883406 |
| GO:003272GO:003272positive 1/65 | 20/18866  | 6.67E-02 | 0.301526572 | 0.269883406 |
| GO:007107GO:007107regulatic1/65 | 20/18866  | 6.67E-02 | 0.301526572 | 0.269883406 |
| GO:190264GO:190264tertiary 1/65 | 20/18866  | 6.67E-02 | 0.301526572 | 0.269883406 |
| GO:200019GO:200019positive 1/65 | 20/18866  | 6.67E-02 | 0.301526572 | 0.269883406 |
| GO:004247GO:004247ear morph2/65 | 123/18866 | 6.72E-02 | 0.301526572 | 0.269883406 |
| GO:000181GO:000181positive 4/65 | 447/18866 | 6.81E-02 | 0.301526572 | 0.269883406 |
| GO:004343GO:004343response 4/65 | 447/18866 | 6.81E-02 | 0.301526572 | 0.269883406 |
| GO:00512CGO:005120sequester2/65 | 124/18866 | 6.82E-02 | 0.301526572 | 0.269883406 |
| GO:000183GO:000183embryonic2/65 | 125/18866 | 6.91E-02 | 0.301526572 | 0.269883406 |
| GO:000301GO:000301renal sys2/65 | 125/18866 | 6.91E-02 | 0.301526572 | 0.269883406 |
| GO:004856GO:004856embryonic4/65 | 451/18866 | 6.99E-02 | 0.301526572 | 0.269883406 |
| GO:000269GO:000269positive 1/65 | 21/18866  | 6.99E-02 | 0.301526572 | 0.269883406 |
| GO:001613GO:001613glycoside1/65 | 21/18866  | 6.99E-02 | 0.301526572 | 0.269883406 |
| GO:003545GO:003545response 1/65 | 21/18866  | 6.99E-02 | 0.301526572 | 0.269883406 |
| GO:004424GO:004424lipid dig1/65 | 21/18866  | 6.99E-02 | 0.301526572 | 0.269883406 |
| GO:190488GO:190488beta-cate1/65 | 21/18866  | 6.99E-02 | 0.301526572 | 0.269883406 |
| GO:000754GO:000754sex diffe3/65 | 280/18866 | 7.22E-02 | 0.301526572 | 0.269883406 |
| GO:190165GO:190165glycosyl 2/65 | 129/18866 | 7.30E-02 | 0.301526572 | 0.269883406 |
| GO:000208GO:000208lens morp1/65 | 22/18866  | 7.32E-02 | 0.301526572 | 0.269883406 |
| GO:000692GO:000692inflammat1/65 | 22/18866  | 7.32E-02 | 0.301526572 | 0.269883406 |
| GO:000919GO:000919cyclic nul/65 | 22/18866  | 7.32E-02 | 0.301526572 | 0.269883406 |
| GO:000922GO:000922pyrimidin1/65 | 22/18866  | 7.32E-02 | 0.301526572 | 0.269883406 |
| GO:00330CGO:003300positive 1/65 | 22/18866  | 7.32E-02 | 0.301526572 | 0.269883406 |
| GO:003361GO:003361mitochond1/65 | 22/18866  | 7.32E-02 | 0.301526572 | 0.269883406 |
| GO:003953GO:003953regulatic1/65 | 22/18866  | 7.32E-02 | 0.301526572 | 0.269883406 |
| GO:004274GO:004274regulatic1/65 | 22/18866  | 7.32E-02 | 0.301526572 | 0.269883406 |
| GO:004565GO:004565regulatic1/65 | 22/18866  | 7.32E-02 | 0.301526572 | 0.269883406 |
| GO:004605GO:004605cAMP meta1/65 | 22/18866  | 7.32E-02 | 0.301526572 | 0.269883406 |
| GO:00508CGO:005080circadian1/65 | 22/18866  | 7.32E-02 | 0.301526572 | 0.269883406 |
| GO:005265GO:005265cyclic pul/65 | 22/18866  | 7.32E-02 | 0.301526572 | 0.269883406 |
| GO:006048GO:006048lung epit1/65 | 22/18866  | 7.32E-02 | 0.301526572 | 0.269883406 |
| GO:003286GO:003286response 3/65 | 283/18866 | 7.41E-02 | 0.301526572 | 0.269883406 |
| GO:00093CGO:000930protein s4/65 | 462/18866 | 7.49E-02 | 0.301526572 | 0.269883406 |
| GO:003559GO:003559establish4/65 | 463/18866 | 7.54E-02 | 0.301526572 | 0.269883406 |
| GO:000727GO:000727neuromusc1/65 | 23/18866  | 7.64E-02 | 0.301526572 | 0.269883406 |
| GO:001015GO:001015regulatic1/65 | 23/18866  | 7.64E-02 | 0.301526572 | 0.269883406 |
| GO:003574GO:003574CD4-posit1/65 | 23/18866  | 7.64E-02 | 0.301526572 | 0.269883406 |
| GO:004245GO:004245purine nul/65 | 23/18866  | 7.64E-02 | 0.301526572 | 0.269883406 |
| GO:004245GO:004245ribonucle1/65 | 23/18866  | 7.64E-02 | 0.301526572 | 0.269883406 |
| GO:004612GO:004612purine ril/65 | 23/18866  | 7.64E-02 | 0.301526572 | 0.269883406 |
| GO:005086GO:005086negative 1/65 | 23/18866  | 7.64E-02 | 0.301526572 | 0.269883406 |
| GO:006047GO:006047lung cell1/65 | 23/18866  | 7.64E-02 | 0.301526572 | 0.269883406 |
| GO:000616GO:000616nucleosid2/65 | 133/18866 | 7.70E-02 | 0.301526572 | 0.269883406 |
| GO:007217GO:007217epithelia2/65 | 133/18866 | 7.70E-02 | 0.301526572 | 0.269883406 |
| GO:000749GO:000749mesoderm 2/65 | 134/18866 | 7.80E-02 | 0.301526572 | 0.269883406 |
| GO:003475GO:003475cellular 2/65 | 134/18866 | 7.80E-02 | 0.301526572 | 0.269883406 |
| GO:007133GO:007133cellular 2/65 | 134/18866 | 7.80E-02 | 0.301526572 | 0.269883406 |
| GO:000269GO:000269regulatic4/65 | 470/18866 | 7.87E-02 | 0.301526572 | 0.269883406 |
| GO:007169GO:007169protein 14/65 | 470/18866 | 7.87E-02 | 0.301526572 | 0.269883406 |

|                                 |           |          |             |             |
|---------------------------------|-----------|----------|-------------|-------------|
| GO:004693GO:004693nucleotid2/65 | 135/18866 | 7.90E-02 | 0.301526572 | 0.269883406 |
| GO:007083GO:007083divalent 4/65 | 471/18866 | 7.92E-02 | 0.301526572 | 0.269883406 |
| GO:000921GO:000921pyrimidin1/65 | 24/18866  | 7.95E-02 | 0.301526572 | 0.269883406 |
| GO:001655GO:001655mRNA modif/65 | 24/18866  | 7.95E-02 | 0.301526572 | 0.269883406 |
| GO:003134GO:003134negative 1/65 | 24/18866  | 7.95E-02 | 0.301526572 | 0.269883406 |
| GO:003412GO:003412positive 1/65 | 24/18866  | 7.95E-02 | 0.301526572 | 0.269883406 |
| GO:004874GO:004874smooth mul/65 | 24/18866  | 7.95E-02 | 0.301526572 | 0.269883406 |
| GO:009010GO:009010cochlea n1/65 | 24/18866  | 7.95E-02 | 0.301526572 | 0.269883406 |
| GO:009016GO:009016regulatic1/65 | 24/18866  | 7.95E-02 | 0.301526572 | 0.269883406 |
| GO:005067GO:005067positive 2/65 | 136/18866 | 8.00E-02 | 0.301526572 | 0.269883406 |
| GO:007133GO:007133cellular 2/65 | 136/18866 | 8.00E-02 | 0.301526572 | 0.269883406 |
| GO:003053GO:003053adult beh2/65 | 137/18866 | 8.10E-02 | 0.301526572 | 0.269883406 |
| GO:003294GO:003294positive 2/65 | 137/18866 | 8.10E-02 | 0.301526572 | 0.269883406 |
| GO:007132GO:007132cellular 2/65 | 137/18866 | 8.10E-02 | 0.301526572 | 0.269883406 |
| GO:000270GO:000270positive 2/65 | 138/18866 | 8.20E-02 | 0.301526572 | 0.269883406 |
| GO:007251GO:007251divalent 4/65 | 478/18866 | 8.26E-02 | 0.301526572 | 0.269883406 |
| GO:001084GO:001084retina la1/65 | 25/18866  | 8.27E-02 | 0.301526572 | 0.269883406 |
| GO:002241GO:002241circadian1/65 | 25/18866  | 8.27E-02 | 0.301526572 | 0.269883406 |
| GO:003264GO:003264regulatic1/65 | 25/18866  | 8.27E-02 | 0.301526572 | 0.269883406 |
| GO:003416GO:003416toll-like1/65 | 25/18866  | 8.27E-02 | 0.301526572 | 0.269883406 |
| GO:003952GO:003952RIG-I sig1/65 | 25/18866  | 8.27E-02 | 0.301526572 | 0.269883406 |
| GO:004330GO:004330positive 1/65 | 25/18866  | 8.27E-02 | 0.301526572 | 0.269883406 |
| GO:004603GO:004603GTP metab1/65 | 25/18866  | 8.27E-02 | 0.301526572 | 0.269883406 |
| GO:005189GO:005189positive 1/65 | 25/18866  | 8.27E-02 | 0.301526572 | 0.269883406 |
| GO:006033GO:006033regulatic1/65 | 25/18866  | 8.27E-02 | 0.301526572 | 0.269883406 |
| GO:006033GO:006033regulatic1/65 | 25/18866  | 8.27E-02 | 0.301526572 | 0.269883406 |
| GO:009755GO:009755calcium i2/65 | 140/18866 | 8.41E-02 | 0.301526572 | 0.269883406 |
| GO:000740GO:000740axonogene4/65 | 482/18866 | 8.45E-02 | 0.301526572 | 0.269883406 |
| GO:000858GO:000858male gona2/65 | 141/18866 | 8.51E-02 | 0.301526572 | 0.269883406 |
| GO:000958GO:000958detection2/65 | 141/18866 | 8.51E-02 | 0.301526572 | 0.269883406 |
| GO:000670GO:000670C21-sterc1/65 | 26/18866  | 8.59E-02 | 0.301526572 | 0.269883406 |
| GO:000853GO:000853respiratc1/65 | 26/18866  | 8.59E-02 | 0.301526572 | 0.269883406 |
| GO:002188GO:002188forebrain1/65 | 26/18866  | 8.59E-02 | 0.301526572 | 0.269883406 |
| GO:002195GO:002195central n1/65 | 26/18866  | 8.59E-02 | 0.301526572 | 0.269883406 |
| GO:003411GO:003411regulatic1/65 | 26/18866  | 8.59E-02 | 0.301526572 | 0.269883406 |
| GO:004273GO:004273fibrinoly1/65 | 26/18866  | 8.59E-02 | 0.301526572 | 0.269883406 |
| GO:004283GO:004283defense r1/65 | 26/18866  | 8.59E-02 | 0.301526572 | 0.269883406 |
| GO:006021GO:006021camera-ty1/65 | 26/18866  | 8.59E-02 | 0.301526572 | 0.269883406 |
| GO:007063GO:007063transepit1/65 | 26/18866  | 8.59E-02 | 0.301526572 | 0.269883406 |
| GO:007137GO:007137cellular 1/65 | 26/18866  | 8.59E-02 | 0.301526572 | 0.269883406 |
| GO:014005GO:014005neuron pr1/65 | 26/18866  | 8.59E-02 | 0.301526572 | 0.269883406 |
| GO:004856GO:004856embryonic3/65 | 302/18866 | 8.61E-02 | 0.301526572 | 0.269883406 |
| GO:004642GO:004642regulatic2/65 | 142/18866 | 8.61E-02 | 0.301526572 | 0.269883406 |
| GO:004654GO:004654developme2/65 | 142/18866 | 8.61E-02 | 0.301526572 | 0.269883406 |
| GO:190352GO:190352regulatic3/65 | 303/18866 | 8.67E-02 | 0.301526572 | 0.269883406 |
| GO:003476GO:003476regulatic4/65 | 489/18866 | 8.80E-02 | 0.301526572 | 0.269883406 |
| GO:004851GO:004851rhythmic 3/65 | 305/18866 | 8.81E-02 | 0.301526572 | 0.269883406 |
| GO:000270GO:000270regulatic2/65 | 144/18866 | 8.82E-02 | 0.301526572 | 0.269883406 |
| GO:000958GO:000958detection2/65 | 144/18866 | 8.82E-02 | 0.301526572 | 0.269883406 |
| GO:006007GO:006007regulatic2/65 | 144/18866 | 8.82E-02 | 0.301526572 | 0.269883406 |
| GO:000156GO:000156response 1/65 | 27/18866  | 8.90E-02 | 0.301526572 | 0.269883406 |

|                                  |           |          |             |             |
|----------------------------------|-----------|----------|-------------|-------------|
| GO:000196GO:000196synaptic 1/65  | 27/18866  | 8.90E-02 | 0.301526572 | 0.269883406 |
| GO:000202GO:000202regulatic1/65  | 27/18866  | 8.90E-02 | 0.301526572 | 0.269883406 |
| GO:000651GO:000651glycoprot1/65  | 27/18866  | 8.90E-02 | 0.301526572 | 0.269883406 |
| GO:000762GO:000762adult wall/65  | 27/18866  | 8.90E-02 | 0.301526572 | 0.269883406 |
| GO:00326CGO:003260interferc1/65  | 27/18866  | 8.90E-02 | 0.301526572 | 0.269883406 |
| GO:004248GO:004248regulatic1/65  | 27/18866  | 8.90E-02 | 0.301526572 | 0.269883406 |
| GO:004642GO:004642negative 1/65  | 27/18866  | 8.90E-02 | 0.301526572 | 0.269883406 |
| GO:004866GO:004866collateral1/65 | 27/18866  | 8.90E-02 | 0.301526572 | 0.269883406 |
| GO:190247GO:190247regulatic1/65  | 27/18866  | 8.90E-02 | 0.301526572 | 0.269883406 |
| GO:007132GO:007132cellular 2/65  | 145/18866 | 8.92E-02 | 0.301526572 | 0.269883406 |
| GO:004881GO:004881dendrite 2/65  | 146/18866 | 9.03E-02 | 0.301526572 | 0.269883406 |
| GO:190406GO:190406positive 2/65  | 147/18866 | 9.13E-02 | 0.301526572 | 0.269883406 |
| GO:000196GO:000196startle r1/65  | 28/18866  | 9.22E-02 | 0.301526572 | 0.269883406 |
| GO:002201GO:002201myelinatil/65  | 28/18866  | 9.22E-02 | 0.301526572 | 0.269883406 |
| GO:003229GO:003229peripheral/65  | 28/18866  | 9.22E-02 | 0.301526572 | 0.269883406 |
| GO:004274GO:004274circadian1/65  | 28/18866  | 9.22E-02 | 0.301526572 | 0.269883406 |
| GO:007237GO:007237protein a1/65  | 28/18866  | 9.22E-02 | 0.301526572 | 0.269883406 |
| GO:007237GO:007237blood coal/65  | 28/18866  | 9.22E-02 | 0.301526572 | 0.269883406 |
| GO:00902CGO:009020positive 1/65  | 28/18866  | 9.22E-02 | 0.301526572 | 0.269883406 |
| GO:00955CGO:009550acetylchc1/65  | 28/18866  | 9.22E-02 | 0.301526572 | 0.269883406 |
| GO:200019GO:200019regulatic1/65  | 28/18866  | 9.22E-02 | 0.301526572 | 0.269883406 |
| GO:200046GO:200046positive 1/65  | 28/18866  | 9.22E-02 | 0.301526572 | 0.269883406 |
| GO:007058GO:007058calcium i3/65  | 312/18866 | 9.27E-02 | 0.301526572 | 0.269883406 |
| GO:00226CGO:002260regulatic4/65  | 499/18866 | 9.31E-02 | 0.301526572 | 0.269883406 |
| GO:003514GO:003514tube form2/65  | 150/18866 | 9.45E-02 | 0.301526572 | 0.269883406 |
| GO:007066GO:007066positive 2/65  | 150/18866 | 9.45E-02 | 0.301526572 | 0.269883406 |
| GO:000177GO:000177myeloid d1/65  | 29/18866  | 9.53E-02 | 0.301526572 | 0.269883406 |
| GO:001572GO:001572bile acid1/65  | 29/18866  | 9.53E-02 | 0.301526572 | 0.269883406 |
| GO:00216CGO:002160cranial n1/65  | 29/18866  | 9.53E-02 | 0.301526572 | 0.269883406 |
| GO:003303GO:003303regulatic1/65  | 29/18866  | 9.53E-02 | 0.301526572 | 0.269883406 |
| GO:004303GO:004303positive 1/65  | 29/18866  | 9.53E-02 | 0.301526572 | 0.269883406 |
| GO:004824GO:004824sperm cap1/65  | 29/18866  | 9.53E-02 | 0.301526572 | 0.269883406 |
| GO:006109GO:006109negative 1/65  | 29/18866  | 9.53E-02 | 0.301526572 | 0.269883406 |
| GO:007007GO:007007histone l1/65  | 29/18866  | 9.53E-02 | 0.301526572 | 0.269883406 |
| GO:009065GO:009065walking b1/65  | 29/18866  | 9.53E-02 | 0.301526572 | 0.269883406 |
| GO:015011GO:015011positive 1/65  | 29/18866  | 9.53E-02 | 0.301526572 | 0.269883406 |
| GO:001633GO:001633morphogen2/65  | 151/18866 | 9.55E-02 | 0.301526572 | 0.269883406 |
| GO:005087GO:005087positive 2/65  | 151/18866 | 9.55E-02 | 0.301526572 | 0.269883406 |
| GO:005122GO:005122negative 2/65  | 151/18866 | 9.55E-02 | 0.301526572 | 0.269883406 |
| GO:190489GO:190489regulatic2/65  | 151/18866 | 9.55E-02 | 0.301526572 | 0.269883406 |
| GO:000222GO:000222toll-like2/65  | 152/18866 | 9.66E-02 | 0.301947143 | 0.27025984  |
| GO:190316GO:190316regulatic2/65  | 152/18866 | 9.66E-02 | 0.301947143 | 0.27025984  |
| GO:000167GO:000167cellular 2/65  | 153/18866 | 9.77E-02 | 0.301947143 | 0.27025984  |
| GO:000727GO:000727synaptic 1/65  | 30/18866  | 9.84E-02 | 0.301947143 | 0.27025984  |
| GO:001657GO:001657histone d1/65  | 30/18866  | 9.84E-02 | 0.301947143 | 0.27025984  |
| GO:003051GO:003051positive 1/65  | 30/18866  | 9.84E-02 | 0.301947143 | 0.27025984  |
| GO:003272GO:003272positive 1/65  | 30/18866  | 9.84E-02 | 0.301947143 | 0.27025984  |
| GO:003566GO:003566TRIF-depel/65  | 30/18866  | 9.84E-02 | 0.301947143 | 0.27025984  |
| GO:012003GO:012003negative 1/65  | 30/18866  | 9.84E-02 | 0.301947143 | 0.27025984  |
| GO:190384GO:190384positive 1/65  | 30/18866  | 9.84E-02 | 0.301947143 | 0.27025984  |
| GO:190514GO:190514response 1/65  | 30/18866  | 9.84E-02 | 0.301947143 | 0.27025984  |

|                                 |           |          |             |             |
|---------------------------------|-----------|----------|-------------|-------------|
| GO:190514GO:190514cellular 1/65 | 30/18866  | 9.84E-02 | 0.301947143 | 0.27025984  |
| GO:000913GO:000913nucleosid2/65 | 155/18866 | 9.98E-02 | 0.304820015 | 0.272831224 |
| GO:190495GO:190495negative 2/65 | 155/18866 | 9.98E-02 | 0.304820015 | 0.272831224 |
| GO:000282GO:000282regulatic1/65 | 31/18866  | 1.02E-01 | 0.307194535 | 0.274956554 |
| GO:000939GO:0009392'-deoxyr1/65 | 31/18866  | 1.02E-01 | 0.307194535 | 0.274956554 |
| GO:001404GO:001404Schwann c1/65 | 31/18866  | 1.02E-01 | 0.307194535 | 0.274956554 |
| GO:005085GO:005085negative 1/65 | 31/18866  | 1.02E-01 | 0.307194535 | 0.274956554 |
| GO:006040GO:006040calcium i2/65 | 158/18866 | 1.03E-01 | 0.309460694 | 0.276984895 |
| GO:005077GO:005077negative 2/65 | 159/18866 | 1.04E-01 | 0.309460694 | 0.276984895 |
| GO:000272GO:000272regulatic1/65 | 32/18866  | 1.05E-01 | 0.309460694 | 0.276984895 |
| GO:000648GO:000648protein d1/65 | 32/18866  | 1.05E-01 | 0.309460694 | 0.276984895 |
| GO:000821GO:000821protein d1/65 | 32/18866  | 1.05E-01 | 0.309460694 | 0.276984895 |
| GO:004330GO:004330regulatic1/65 | 32/18866  | 1.05E-01 | 0.309460694 | 0.276984895 |
| GO:004632GO:004632regulatic1/65 | 32/18866  | 1.05E-01 | 0.309460694 | 0.276984895 |
| GO:007052GO:007052protein k1/65 | 32/18866  | 1.05E-01 | 0.309460694 | 0.276984895 |
| GO:007057GO:007057regulatic1/65 | 32/18866  | 1.05E-01 | 0.309460694 | 0.276984895 |
| GO:007135GO:007135cellular 1/65 | 32/18866  | 1.05E-01 | 0.309460694 | 0.276984895 |
| GO:003476GO:003476positive 2/65 | 161/18866 | 1.06E-01 | 0.31226816  | 0.279497737 |
| GO:000269GO:000269regulatic1/65 | 33/18866  | 1.08E-01 | 0.31226816  | 0.279497737 |
| GO:000637GO:0006377-methylg1/65 | 33/18866  | 1.08E-01 | 0.31226816  | 0.279497737 |
| GO:001969GO:001969deoxyribc1/65 | 33/18866  | 1.08E-01 | 0.31226816  | 0.279497737 |
| GO:003300GO:003300regulatic1/65 | 33/18866  | 1.08E-01 | 0.31226816  | 0.279497737 |
| GO:003302GO:003302myeloid c1/65 | 33/18866  | 1.08E-01 | 0.31226816  | 0.279497737 |
| GO:003559GO:003559purinergil/65 | 33/18866  | 1.08E-01 | 0.31226816  | 0.279497737 |
| GO:012025GO:012025olefinic 1/65 | 33/18866  | 1.08E-01 | 0.31226816  | 0.279497737 |
| GO:190489GO:190489negative 1/65 | 33/18866  | 1.08E-01 | 0.31226816  | 0.279497737 |
| GO:003249GO:003249response 3/65 | 334/18866 | 1.08E-01 | 0.31226816  | 0.279497737 |
| GO:002191GO:002191neural tu2/65 | 163/18866 | 1.09E-01 | 0.31226816  | 0.279497737 |
| GO:005508GO:005508lipid hor2/65 | 163/18866 | 1.09E-01 | 0.31226816  | 0.279497737 |
| GO:000725GO:000725receptor 2/65 | 164/18866 | 1.10E-01 | 0.31226816  | 0.279497737 |
| GO:000275GO:000275MyD88-ind1/65 | 34/18866  | 1.11E-01 | 0.31226816  | 0.279497737 |
| GO:000288GO:000288positive 1/65 | 34/18866  | 1.11E-01 | 0.31226816  | 0.279497737 |
| GO:000945GO:0009457-methylg1/65 | 34/18866  | 1.11E-01 | 0.31226816  | 0.279497737 |
| GO:003043GO:003043sleep 1/65    | 34/18866  | 1.11E-01 | 0.31226816  | 0.279497737 |
| GO:003626GO:003626RNA cappil/65 | 34/18866  | 1.11E-01 | 0.31226816  | 0.279497737 |
| GO:004590GO:004590positive 1/65 | 34/18866  | 1.11E-01 | 0.31226816  | 0.279497737 |
| GO:005148GO:005148positive 1/65 | 34/18866  | 1.11E-01 | 0.31226816  | 0.279497737 |
| GO:006023GO:006023regulatic1/65 | 34/18866  | 1.11E-01 | 0.31226816  | 0.279497737 |
| GO:200035GO:200035negative 1/65 | 34/18866  | 1.11E-01 | 0.31226816  | 0.279497737 |
| GO:190353GO:190353negative 2/65 | 166/18866 | 1.12E-01 | 0.313530908 | 0.280627968 |
| GO:000647GO:000647protein A1/65 | 35/18866  | 1.14E-01 | 0.313530908 | 0.280627968 |
| GO:000926GO:000926deoxyribc1/65 | 35/18866  | 1.14E-01 | 0.313530908 | 0.280627968 |
| GO:001404GO:001404dopamine 1/65 | 35/18866  | 1.14E-01 | 0.313530908 | 0.280627968 |
| GO:001405GO:001405regulatic1/65 | 35/18866  | 1.14E-01 | 0.313530908 | 0.280627968 |
| GO:001648GO:001648peptide h1/65 | 35/18866  | 1.14E-01 | 0.313530908 | 0.280627968 |
| GO:004833GO:004833mesodermal/65 | 35/18866  | 1.14E-01 | 0.313530908 | 0.280627968 |
| GO:007067GO:007067response 1/65 | 35/18866  | 1.14E-01 | 0.313530908 | 0.280627968 |
| GO:007131GO:007131cellular 1/65 | 35/18866  | 1.14E-01 | 0.313530908 | 0.280627968 |
| GO:014044GO:014044signaling1/65 | 35/18866  | 1.14E-01 | 0.313530908 | 0.280627968 |
| GO:000281GO:000281regulatic2/65 | 168/18866 | 1.14E-01 | 0.313530908 | 0.280627968 |
| GO:000715GO:000715homophili2/65 | 168/18866 | 1.14E-01 | 0.313530908 | 0.280627968 |



|                                 |           |          |             |             |
|---------------------------------|-----------|----------|-------------|-------------|
| GO:000275GO:000275MyD88-dep1/65 | 36/18866  | 1.17E-01 | 0.317305898 | 0.284006799 |
| GO:002195GO:002195central n1/65 | 36/18866  | 1.17E-01 | 0.317305898 | 0.284006799 |
| GO:003376GO:003376response 1/65 | 36/18866  | 1.17E-01 | 0.317305898 | 0.284006799 |
| GO:004667GO:004667negative 1/65 | 36/18866  | 1.17E-01 | 0.317305898 | 0.284006799 |
| GO:007163GO:007163regulatic1/65 | 36/18866  | 1.17E-01 | 0.317305898 | 0.284006799 |
| GO:190166GO:190166quinone n1/65 | 36/18866  | 1.17E-01 | 0.317305898 | 0.284006799 |
| GO:005080GO:005080positive 2/65 | 172/18866 | 1.19E-01 | 0.320293877 | 0.286681209 |
| GO:000915GO:000915purine ri2/65 | 173/18866 | 1.20E-01 | 0.320293877 | 0.286681209 |
| GO:009917GO:009917postsynap2/65 | 173/18866 | 1.20E-01 | 0.320293877 | 0.286681209 |
| GO:004694GO:004694carboxyli3/65 | 350/18866 | 1.20E-01 | 0.320293877 | 0.286681209 |
| GO:000309GO:000309renal wat1/65 | 37/18866  | 1.20E-01 | 0.320293877 | 0.286681209 |
| GO:001700GO:001700cytochrom1/65 | 37/18866  | 1.20E-01 | 0.320293877 | 0.286681209 |
| GO:006042GO:006042lung epit1/65 | 37/18866  | 1.20E-01 | 0.320293877 | 0.286681209 |
| GO:009892GO:009892postsynap1/65 | 37/18866  | 1.20E-01 | 0.320293877 | 0.286681209 |
| GO:001571GO:001571monocarbc2/65 | 174/18866 | 1.21E-01 | 0.320599538 | 0.286954793 |
| GO:009769GO:009769receptor 2/65 | 174/18866 | 1.21E-01 | 0.320599538 | 0.286954793 |
| GO:000726GO:000726neurotran2/65 | 175/18866 | 1.22E-01 | 0.320599538 | 0.286954793 |
| GO:009964GO:009964signal re2/65 | 175/18866 | 1.22E-01 | 0.320599538 | 0.286954793 |
| GO:001584GO:001584organic a3/65 | 353/18866 | 1.22E-01 | 0.320599538 | 0.286954793 |
| GO:001943GO:001943triglycer1/65 | 38/18866  | 1.23E-01 | 0.320599538 | 0.286954793 |
| GO:003022GO:003022monocyte 1/65 | 38/18866  | 1.23E-01 | 0.320599538 | 0.286954793 |
| GO:003273GO:003273positive 1/65 | 38/18866  | 1.23E-01 | 0.320599538 | 0.286954793 |
| GO:005195GO:005195positive 1/65 | 38/18866  | 1.23E-01 | 0.320599538 | 0.286954793 |
| GO:007160GO:007160transform1/65 | 38/18866  | 1.23E-01 | 0.320599538 | 0.286954793 |
| GO:009022GO:009022regulatic1/65 | 38/18866  | 1.23E-01 | 0.320599538 | 0.286954793 |
| GO:190313GO:190313mononucle1/65 | 38/18866  | 1.23E-01 | 0.320599538 | 0.286954793 |
| GO:000223GO:000223response 3/65 | 356/18866 | 1.24E-01 | 0.322110801 | 0.288307459 |
| GO:005125GO:005125positive 3/65 | 357/18866 | 1.25E-01 | 0.322110801 | 0.288307459 |
| GO:006040GO:006040cytosolic2/65 | 178/18866 | 1.25E-01 | 0.322110801 | 0.288307459 |
| GO:000665GO:000665phosphatil/65 | 39/18866  | 1.26E-01 | 0.322110801 | 0.288307459 |
| GO:000719GO:000719activatic1/65 | 39/18866  | 1.26E-01 | 0.322110801 | 0.288307459 |
| GO:000916GO:000916nucleosid1/65 | 39/18866  | 1.26E-01 | 0.322110801 | 0.288307459 |
| GO:001403GO:001403Schwann c1/65 | 39/18866  | 1.26E-01 | 0.322110801 | 0.288307459 |
| GO:004209GO:004209type 2 in1/65 | 39/18866  | 1.26E-01 | 0.322110801 | 0.288307459 |
| GO:190106GO:190106guanosine1/65 | 39/18866  | 1.26E-01 | 0.322110801 | 0.288307459 |
| GO:190211GO:190211negative 1/65 | 39/18866  | 1.26E-01 | 0.322110801 | 0.288307459 |
| GO:003158GO:003158cell-subs3/65 | 359/18866 | 1.27E-01 | 0.323039849 | 0.289139011 |
| GO:005079GO:005079regulatic2/65 | 181/18866 | 1.29E-01 | 0.326022675 | 0.29180881  |
| GO:000918GO:000918cyclic nu1/65 | 40/18866  | 1.29E-01 | 0.326022675 | 0.29180881  |
| GO:003289GO:003289positive 1/65 | 40/18866  | 1.29E-01 | 0.326022675 | 0.29180881  |
| GO:004241GO:004241dopamine 1/65 | 40/18866  | 1.29E-01 | 0.326022675 | 0.29180881  |
| GO:005089GO:005089intestinal/65 | 40/18866  | 1.29E-01 | 0.326022675 | 0.29180881  |
| GO:000244GO:000244lymphocyt3/65 | 366/18866 | 1.32E-01 | 0.329195202 | 0.294648401 |
| GO:000194GO:000194postsynap1/65 | 41/18866  | 1.32E-01 | 0.329195202 | 0.294648401 |
| GO:000721GO:000721dopamine 1/65 | 41/18866  | 1.32E-01 | 0.329195202 | 0.294648401 |
| GO:004549GO:004549photorecel/65 | 41/18866  | 1.32E-01 | 0.329195202 | 0.294648401 |
| GO:005091GO:005091sensory p1/65 | 41/18866  | 1.32E-01 | 0.329195202 | 0.294648401 |
| GO:005135GO:005135negative 1/65 | 41/18866  | 1.32E-01 | 0.329195202 | 0.294648401 |
| GO:190204GO:190204negative 1/65 | 41/18866  | 1.32E-01 | 0.329195202 | 0.294648401 |
| GO:000926GO:000926ribonucle2/65 | 186/18866 | 1.35E-01 | 0.33501789  | 0.299860038 |
| GO:009027GO:009027negative 1/65 | 42/18866  | 1.35E-01 | 0.33501789  | 0.299860038 |

|                                  |           |          |             |             |
|----------------------------------|-----------|----------|-------------|-------------|
| GO:000246GO:000246adaptive 3/65  | 370/18866 | 1.35E-01 | 0.33501789  | 0.299860038 |
| GO:003134GO:003134negative 2/65  | 188/18866 | 1.37E-01 | 0.337725263 | 0.30228329  |
| GO:004312GO:004312positive 2/65  | 188/18866 | 1.37E-01 | 0.337725263 | 0.30228329  |
| GO:000236GO:000236T cell cyl/65  | 43/18866  | 1.38E-01 | 0.337725263 | 0.30228329  |
| GO:001570GO:001570bicarbona1/65  | 43/18866  | 1.38E-01 | 0.337725263 | 0.30228329  |
| GO:005085GO:005085regulatic1/65  | 43/18866  | 1.38E-01 | 0.337725263 | 0.30228329  |
| GO:190165GO:190165glycosyl 1/65  | 43/18866  | 1.38E-01 | 0.337725263 | 0.30228329  |
| GO:000736GO:000736gastrulat2/65  | 189/18866 | 1.38E-01 | 0.337725263 | 0.30228329  |
| GO:001810GO:001810peptidyl-3/65  | 374/18866 | 1.38E-01 | 0.337725263 | 0.30228329  |
| GO:005104GO:005104negative 2/65  | 190/18866 | 1.39E-01 | 0.339681116 | 0.30403389  |
| GO:001821GO:001821peptidyl-3/65  | 377/18866 | 1.41E-01 | 0.341188021 | 0.305382655 |
| GO:003300GO:003300regulatic1/65  | 44/18866  | 1.41E-01 | 0.341188021 | 0.305382655 |
| GO:004218GO:004218ketone bil/65  | 44/18866  | 1.41E-01 | 0.341188021 | 0.305382655 |
| GO:009702GO:009702dendritic1/65  | 44/18866  | 1.41E-01 | 0.341188021 | 0.305382655 |
| GO:006113GO:006113regulatic2/65  | 193/18866 | 1.43E-01 | 0.344169608 | 0.308051345 |
| GO:000263GO:000263positive 1/65  | 45/18866  | 1.44E-01 | 0.344169608 | 0.308051345 |
| GO:003236GO:003236intracell1/65  | 45/18866  | 1.44E-01 | 0.344169608 | 0.308051345 |
| GO:004521GO:004521sarcomere1/65  | 45/18866  | 1.44E-01 | 0.344169608 | 0.308051345 |
| GO:007258GO:007258clathrin-1/65  | 45/18866  | 1.44E-01 | 0.344169608 | 0.308051345 |
| GO:009881GO:009881modulatic1/65  | 45/18866  | 1.44E-01 | 0.344169608 | 0.308051345 |
| GO:004639GO:004639ribose ph2/65  | 194/18866 | 1.44E-01 | 0.344169608 | 0.308051345 |
| GO:005073GO:005073positive 2/65  | 195/18866 | 1.45E-01 | 0.345610683 | 0.309341189 |
| GO:005086GO:005086regulatic2/65  | 195/18866 | 1.45E-01 | 0.345610683 | 0.309341189 |
| GO:000170GO:000170in utero 3/65  | 383/18866 | 1.45E-01 | 0.345610683 | 0.309341189 |
| GO:005098GO:005098detection1/65  | 46/18866  | 1.47E-01 | 0.348251038 | 0.311704456 |
| GO:000616GO:000616purine nu2/65  | 197/18866 | 1.48E-01 | 0.348251038 | 0.311704456 |
| GO:000974GO:000974response 2/65  | 197/18866 | 1.48E-01 | 0.348251038 | 0.311704456 |
| GO:004883GO:004883inner ear2/65  | 197/18866 | 1.48E-01 | 0.348251038 | 0.311704456 |
| GO:000854GO:000854visual le1/65  | 47/18866  | 1.50E-01 | 0.351355763 | 0.314483362 |
| GO:004330GO:004330regulatic1/65  | 47/18866  | 1.50E-01 | 0.351355763 | 0.314483362 |
| GO:004330GO:004330mast cell1/65  | 47/18866  | 1.50E-01 | 0.351355763 | 0.314483362 |
| GO:009950GO:009950synaptic 2/65  | 199/18866 | 1.50E-01 | 0.351355763 | 0.314483362 |
| GO:190188GO:190188regulatic2/65  | 200/18866 | 1.51E-01 | 0.352159026 | 0.315202327 |
| GO:000227GO:000227mast cell1/65  | 48/18866  | 1.53E-01 | 0.352159026 | 0.315202327 |
| GO:000820GO:000820bile acid1/65  | 48/18866  | 1.53E-01 | 0.352159026 | 0.315202327 |
| GO:003264GO:003264regulatic1/65  | 48/18866  | 1.53E-01 | 0.352159026 | 0.315202327 |
| GO:004222GO:004222response 1/65  | 48/18866  | 1.53E-01 | 0.352159026 | 0.315202327 |
| GO:004646GO:004646neutral 11/65  | 48/18866  | 1.53E-01 | 0.352159026 | 0.315202327 |
| GO:004646GO:004646acylglyce1/65  | 48/18866  | 1.53E-01 | 0.352159026 | 0.315202327 |
| GO:190403GO:190403negative 1/65  | 48/18866  | 1.53E-01 | 0.352159026 | 0.315202327 |
| GO:000686GO:000686lipid tra3/65  | 393/18866 | 1.54E-01 | 0.352159026 | 0.315202327 |
| GO:000974GO:000974response 2/65  | 202/18866 | 1.54E-01 | 0.352159026 | 0.315202327 |
| GO:000206GO:000206glandular1/65  | 49/18866  | 1.56E-01 | 0.352159026 | 0.315202327 |
| GO:000244GO:000244mast cell1/65  | 49/18866  | 1.56E-01 | 0.352159026 | 0.315202327 |
| GO:000669GO:000669prostanoid1/65 | 49/18866  | 1.56E-01 | 0.352159026 | 0.315202327 |
| GO:000669GO:000669prostagla1/65  | 49/18866  | 1.56E-01 | 0.352159026 | 0.315202327 |
| GO:001587GO:001587dopamine 1/65  | 49/18866  | 1.56E-01 | 0.352159026 | 0.315202327 |
| GO:006071GO:006071labyrinth1/65  | 49/18866  | 1.56E-01 | 0.352159026 | 0.315202327 |
| GO:007234GO:007234sulfur cc1/65  | 49/18866  | 1.56E-01 | 0.352159026 | 0.315202327 |
| GO:009019GO:009019regulatic1/65  | 49/18866  | 1.56E-01 | 0.352159026 | 0.315202327 |
| GO:012017GO:012017steroid h1/65  | 49/18866  | 1.56E-01 | 0.352159026 | 0.315202327 |

|                                 |           |          |             |             |
|---------------------------------|-----------|----------|-------------|-------------|
| GO:20001CGO:200010negative 1/65 | 49/18866  | 1.56E-01 | 0.352159026 | 0.315202327 |
| GO:003563GO:003563multicell2/65 | 206/18866 | 1.58E-01 | 0.352159026 | 0.315202327 |
| GO:000177GO:000177microglial/65 | 50/18866  | 1.59E-01 | 0.352159026 | 0.315202327 |
| GO:000226GO:000226leukocyte1/65 | 50/18866  | 1.59E-01 | 0.352159026 | 0.315202327 |
| GO:000271GO:000271positive 1/65 | 50/18866  | 1.59E-01 | 0.352159026 | 0.315202327 |
| GO:000752GO:000752neuromuscl/65 | 50/18866  | 1.59E-01 | 0.352159026 | 0.315202327 |
| GO:001071GO:001071positive 1/65 | 50/18866  | 1.59E-01 | 0.352159026 | 0.315202327 |
| GO:003019GO:003019negative 1/65 | 50/18866  | 1.59E-01 | 0.352159026 | 0.315202327 |
| GO:00326CGO:003260interfercl/65 | 50/18866  | 1.59E-01 | 0.352159026 | 0.315202327 |
| GO:005087GO:005087brown fat1/65 | 50/18866  | 1.59E-01 | 0.352159026 | 0.315202327 |
| GO:009905GO:009905presynaps1/65 | 50/18866  | 1.59E-01 | 0.352159026 | 0.315202327 |
| GO:190372GO:190372positive 1/65 | 50/18866  | 1.59E-01 | 0.352159026 | 0.315202327 |
| GO:003428GO:003428response 2/65 | 207/18866 | 1.60E-01 | 0.353247554 | 0.316176622 |
| GO:007252GO:007252purine-cc2/65 | 208/18866 | 1.61E-01 | 0.353247554 | 0.316176622 |
| GO:002154GO:002154cranial n1/65 | 51/18866  | 1.62E-01 | 0.353247554 | 0.316176622 |
| GO:002187GO:002187forebrain1/65 | 51/18866  | 1.62E-01 | 0.353247554 | 0.316176622 |
| GO:004814GO:004814positive 1/65 | 51/18866  | 1.62E-01 | 0.353247554 | 0.316176622 |
| GO:004825GO:004825mRNA stab1/65 | 51/18866  | 1.62E-01 | 0.353247554 | 0.316176622 |
| GO:005088GO:005088neuromuscl/65 | 51/18866  | 1.62E-01 | 0.353247554 | 0.316176622 |
| GO:00901CGO:009010cochlea d1/65 | 51/18866  | 1.62E-01 | 0.353247554 | 0.316176622 |
| GO:190004GO:190004negative 1/65 | 51/18866  | 1.62E-01 | 0.353247554 | 0.316176622 |
| GO:000257GO:000257myeloid 12/65 | 210/18866 | 1.63E-01 | 0.355792731 | 0.3184547   |
| GO:003476GO:003476positive 2/65 | 210/18866 | 1.63E-01 | 0.355792731 | 0.3184547   |
| GO:000269GO:000269positive 3/65 | 406/18866 | 1.64E-01 | 0.356082232 | 0.31871382  |
| GO:000994GO:000994anterior/1/65 | 52/18866  | 1.64E-01 | 0.356082232 | 0.31871382  |
| GO:200123GO:200123positive 1/65 | 52/18866  | 1.64E-01 | 0.356082232 | 0.31871382  |
| GO:00027CGO:000270regulatic2/65 | 211/18866 | 1.65E-01 | 0.356082232 | 0.31871382  |
| GO:003007GO:003007insulin s2/65 | 213/18866 | 1.67E-01 | 0.359323804 | 0.321615211 |
| GO:009027GO:009027regulatic2/65 | 213/18866 | 1.67E-01 | 0.359323804 | 0.321615211 |
| GO:000763GO:000763visual be1/65 | 53/18866  | 1.67E-01 | 0.359323804 | 0.321615211 |
| GO:007269GO:007269protein 11/65 | 53/18866  | 1.67E-01 | 0.359323804 | 0.321615211 |
| GO:009917GO:009917presynaps1/65 | 53/18866  | 1.67E-01 | 0.359323804 | 0.321615211 |
| GO:004328GO:004328regulatic2/65 | 215/18866 | 1.69E-01 | 0.363055867 | 0.32495562  |
| GO:000658GO:000658catecholal/65 | 54/18866  | 1.70E-01 | 0.363130174 | 0.325022128 |
| GO:000971GO:000971catechol-1/65 | 54/18866  | 1.70E-01 | 0.363130174 | 0.325022128 |
| GO:003085GO:003085negative 1/65 | 54/18866  | 1.70E-01 | 0.363130174 | 0.325022128 |
| GO:005165GO:005165maintenan2/65 | 216/18866 | 1.71E-01 | 0.363310846 | 0.32518384  |
| GO:000762GO:000762circadian2/65 | 218/18866 | 1.73E-01 | 0.365689027 | 0.327312447 |
| GO:000195GO:000195positive 1/65 | 55/18866  | 1.73E-01 | 0.365689027 | 0.327312447 |
| GO:000272GO:000272positive 1/65 | 55/18866  | 1.73E-01 | 0.365689027 | 0.327312447 |
| GO:005043GO:005043regulatic1/65 | 55/18866  | 1.73E-01 | 0.365689027 | 0.327312447 |
| GO:005081GO:005081negative 1/65 | 55/18866  | 1.73E-01 | 0.365689027 | 0.327312447 |
| GO:000007GO:000007cell cycl2/65 | 219/18866 | 1.74E-01 | 0.366988032 | 0.32847513  |
| GO:005067GO:005067regulatic2/65 | 219/18866 | 1.74E-01 | 0.366988032 | 0.32847513  |
| GO:00990CGO:009900vesicle-n2/65 | 220/18866 | 1.76E-01 | 0.368178654 | 0.329540805 |
| GO:000175GO:000175neural cr1/65 | 56/18866  | 1.76E-01 | 0.368178654 | 0.329540805 |
| GO:190201GO:190201regulatic1/65 | 56/18866  | 1.76E-01 | 0.368178654 | 0.329540805 |
| GO:19033CGO:190330positive 1/65 | 56/18866  | 1.76E-01 | 0.368178654 | 0.329540805 |
| GO:003294GO:003294regulatic2/65 | 221/18866 | 1.77E-01 | 0.368628881 | 0.329943783 |
| GO:004244GO:004244hormone n2/65 | 221/18866 | 1.77E-01 | 0.368628881 | 0.329943783 |
| GO:005086GO:005086positive 3/65 | 421/18866 | 1.77E-01 | 0.36863749  | 0.329951489 |

|                                  |           |          |             |             |
|----------------------------------|-----------|----------|-------------|-------------|
| GO:001974GO:001974secondary1/65  | 57/18866  | 1.79E-01 | 0.37001838  | 0.331187464 |
| GO:004438GO:004438protein 11/65  | 57/18866  | 1.79E-01 | 0.37001838  | 0.331187464 |
| GO:005043GO:005043catecholal/65  | 57/18866  | 1.79E-01 | 0.37001838  | 0.331187464 |
| GO:00989CGO:00989Cregulatic1/65  | 57/18866  | 1.79E-01 | 0.37001838  | 0.331187464 |
| GO:00084CGO:00084Cgonad dev2/65  | 223/18866 | 1.79E-01 | 0.370250527 | 0.331395249 |
| GO:004358GO:004358ear devel2/65  | 224/18866 | 1.80E-01 | 0.370700086 | 0.331797629 |
| GO:000201GO:000201morphogen1/65  | 58/18866  | 1.82E-01 | 0.370700086 | 0.331797629 |
| GO:000288GO:000288regulatic1/65  | 58/18866  | 1.82E-01 | 0.370700086 | 0.331797629 |
| GO:004348GO:004348RNA stabil/65  | 58/18866  | 1.82E-01 | 0.370700086 | 0.331797629 |
| GO:004612GO:004612purine ril/65  | 58/18866  | 1.82E-01 | 0.370700086 | 0.331797629 |
| GO:190237GO:190237negative 1/65  | 58/18866  | 1.82E-01 | 0.370700086 | 0.331797629 |
| GO:190379GO:190379positive 1/65  | 58/18866  | 1.82E-01 | 0.370700086 | 0.331797629 |
| GO:190305GO:190305regulatic2/65  | 225/18866 | 1.82E-01 | 0.370700086 | 0.331797629 |
| GO:001606GO:001606immunoglc2/65  | 227/18866 | 1.84E-01 | 0.373520173 | 0.334321767 |
| GO:00311CGO:00311Cneuron pr1/65  | 59/18866  | 1.84E-01 | 0.373520173 | 0.334321767 |
| GO:004303GO:004303regulatic1/65  | 59/18866  | 1.84E-01 | 0.373520173 | 0.334321767 |
| GO:004545GO:004545cell redc1/65  | 59/18866  | 1.84E-01 | 0.373520173 | 0.334321767 |
| GO:190179GO:190179negative 1/65  | 59/18866  | 1.84E-01 | 0.373520173 | 0.334321767 |
| GO:000683GO:000683neurotran2/65  | 229/18866 | 1.87E-01 | 0.375758086 | 0.336324826 |
| GO:004513GO:004513developme2/65  | 229/18866 | 1.87E-01 | 0.375758086 | 0.336324826 |
| GO:000183GO:000183release c1/65  | 60/18866  | 1.87E-01 | 0.375758086 | 0.336324826 |
| GO:001922GO:001922regulatic1/65  | 60/18866  | 1.87E-01 | 0.375758086 | 0.336324826 |
| GO:003265GO:003265regulatic1/65  | 60/18866  | 1.87E-01 | 0.375758086 | 0.336324826 |
| GO:00619CGO:00619Cglial cell1/65 | 60/18866  | 1.87E-01 | 0.375758086 | 0.336324826 |
| GO:00100CGO:00100Cglial cel2/65  | 230/18866 | 1.88E-01 | 0.375777198 | 0.336341933 |
| GO:001972GO:001972B cell me2/65  | 230/18866 | 1.88E-01 | 0.375777198 | 0.336341933 |
| GO:005254GO:005254regulatic3/65  | 434/18866 | 1.88E-01 | 0.375918057 | 0.336468009 |
| GO:002187GO:002187forebrain1/65  | 61/18866  | 1.90E-01 | 0.376798002 | 0.33725561  |
| GO:004227GO:004227purine nul1/65 | 61/18866  | 1.90E-01 | 0.376798002 | 0.33725561  |
| GO:004688GO:004688negative 1/65  | 61/18866  | 1.90E-01 | 0.376798002 | 0.33725561  |
| GO:006151GO:006151protein 11/65  | 61/18866  | 1.90E-01 | 0.376798002 | 0.33725561  |
| GO:190204GO:190204regulatic1/65  | 61/18866  | 1.90E-01 | 0.376798002 | 0.33725561  |
| GO:000974GO:000974response 2/65  | 233/18866 | 1.92E-01 | 0.378922181 | 0.339156871 |
| GO:003411GO:003411heterotyp1/65  | 62/18866  | 1.93E-01 | 0.378922181 | 0.339156871 |
| GO:004885GO:004885neural nul1/65 | 62/18866  | 1.93E-01 | 0.378922181 | 0.339156871 |
| GO:005508GO:005508anion hom1/65  | 62/18866  | 1.93E-01 | 0.378922181 | 0.339156871 |
| GO:006099GO:006099dendritic1/65  | 62/18866  | 1.93E-01 | 0.378922181 | 0.339156871 |
| GO:200035GO:200035regulatic1/65  | 62/18866  | 1.93E-01 | 0.378922181 | 0.339156871 |
| GO:001087GO:001087lipid loc3/65  | 440/18866 | 1.93E-01 | 0.379465164 | 0.339642872 |
| GO:00015CGO:00015Cregulatic2/65  | 235/18866 | 1.94E-01 | 0.380150242 | 0.340256056 |
| GO:000608GO:000608cellular 1/65  | 63/18866  | 1.96E-01 | 0.380427343 | 0.340504076 |
| GO:003112GO:003112cytoplasm1/65  | 63/18866  | 1.96E-01 | 0.380427343 | 0.340504076 |
| GO:003261GO:003261interleuk1/65  | 63/18866  | 1.96E-01 | 0.380427343 | 0.340504076 |
| GO:005189GO:005189regulatic1/65  | 63/18866  | 1.96E-01 | 0.380427343 | 0.340504076 |
| GO:00901CGO:00901Cregulatic1/65  | 63/18866  | 1.96E-01 | 0.380427343 | 0.340504076 |
| GO:00486CGO:00486Creproduct3/65  | 443/18866 | 1.96E-01 | 0.380656749 | 0.340709408 |
| GO:004677GO:004677protein a2/65  | 237/18866 | 1.97E-01 | 0.381076711 | 0.341085298 |
| GO:000193GO:000193negative 3/65  | 444/18866 | 1.97E-01 | 0.38123923  | 0.341230761 |
| GO:000958GO:000958detection1/65  | 64/18866  | 1.98E-01 | 0.382442553 | 0.342307805 |
| GO:004679GO:004679transport1/65  | 64/18866  | 1.98E-01 | 0.382442553 | 0.342307805 |
| GO:00509CGO:00509Csensory p1/65  | 64/18866  | 1.98E-01 | 0.382442553 | 0.342307805 |

|                                 |           |          |             |             |
|---------------------------------|-----------|----------|-------------|-------------|
| GO:200011GO:200011regulatic2/65 | 239/18866 | 1.99E-01 | 0.38310928  | 0.342904563 |
| GO:006145GO:006145reproduct3/65 | 447/18866 | 2.00E-01 | 0.383536906 | 0.343287312 |
| GO:007066GO:007066regulatic2/65 | 240/18866 | 2.00E-01 | 0.383847482 | 0.343565295 |
| GO:000758GO:000758excretion1/65 | 65/18866  | 2.01E-01 | 0.383847482 | 0.343565295 |
| GO:000920GO:000920purine ril/65 | 65/18866  | 2.01E-01 | 0.383847482 | 0.343565295 |
| GO:003164GO:003164positive 1/65 | 65/18866  | 2.01E-01 | 0.383847482 | 0.343565295 |
| GO:009030GO:009030mitotic sl/65 | 65/18866  | 2.01E-01 | 0.383847482 | 0.343565295 |
| GO:000914GO:000914purine nul/65 | 66/18866  | 2.04E-01 | 0.386314889 | 0.345773765 |
| GO:004476GO:004476multi-org1/65 | 66/18866  | 2.04E-01 | 0.386314889 | 0.345773765 |
| GO:015011GO:015011regulatic1/65 | 66/18866  | 2.04E-01 | 0.386314889 | 0.345773765 |
| GO:190160GO:190160alpha-amil/65 | 66/18866  | 2.04E-01 | 0.386314889 | 0.345773765 |
| GO:190257GO:190257multi-org1/65 | 66/18866  | 2.04E-01 | 0.386314889 | 0.345773765 |
| GO:003023GO:003023myofibrill/65 | 67/18866  | 2.07E-01 | 0.389843212 | 0.348931814 |
| GO:003289GO:003289regulatic1/65 | 67/18866  | 2.07E-01 | 0.389843212 | 0.348931814 |
| GO:004512GO:004512cellular 1/65 | 67/18866  | 2.07E-01 | 0.389843212 | 0.348931814 |
| GO:000646GO:000646negative 2/65 | 246/18866 | 2.08E-01 | 0.391447658 | 0.350367885 |
| GO:000263GO:000263regulatic1/65 | 68/18866  | 2.10E-01 | 0.391647651 | 0.350546889 |
| GO:004244GO:004244hormone bl/65 | 68/18866  | 2.10E-01 | 0.391647651 | 0.350546889 |
| GO:005076GO:005076positive 1/65 | 68/18866  | 2.10E-01 | 0.391647651 | 0.350546889 |
| GO:007257GO:007257endothelil/65 | 68/18866  | 2.10E-01 | 0.391647651 | 0.350546889 |
| GO:190236GO:190236negative 1/65 | 68/18866  | 2.10E-01 | 0.391647651 | 0.350546889 |
| GO:005085GO:005085regulatic1/65 | 69/18866  | 2.12E-01 | 0.396194385 | 0.354616475 |
| GO:000268GO:000268negative 3/65 | 463/18866 | 2.14E-01 | 0.397892954 | 0.35613679  |
| GO:000283GO:000283positive 2/65 | 251/18866 | 2.14E-01 | 0.397892954 | 0.35613679  |
| GO:000175GO:000175somitogen1/65 | 70/18866  | 2.15E-01 | 0.397892954 | 0.35613679  |
| GO:003237GO:003237positive 1/65 | 70/18866  | 2.15E-01 | 0.397892954 | 0.35613679  |
| GO:005077GO:005077negative 1/65 | 70/18866  | 2.15E-01 | 0.397892954 | 0.35613679  |
| GO:005079GO:005079regulatic1/65 | 70/18866  | 2.15E-01 | 0.397892954 | 0.35613679  |
| GO:004312GO:004312regulatic2/65 | 252/18866 | 2.15E-01 | 0.398297878 | 0.356499221 |
| GO:005254GO:005254regulatic3/65 | 466/18866 | 2.17E-01 | 0.398989599 | 0.35711835  |
| GO:005192GO:005192regulatic2/65 | 253/18866 | 2.17E-01 | 0.398989599 | 0.35711835  |
| GO:000702GO:000702endoplasm1/65 | 71/18866  | 2.18E-01 | 0.398989599 | 0.35711835  |
| GO:000920GO:000920ribonucle1/65 | 71/18866  | 2.18E-01 | 0.398989599 | 0.35711835  |
| GO:001482GO:001482response 1/65 | 71/18866  | 2.18E-01 | 0.398989599 | 0.35711835  |
| GO:005089GO:005089multicell1/65 | 71/18866  | 2.18E-01 | 0.398989599 | 0.35711835  |
| GO:200002GO:200002regulatic2/65 | 254/18866 | 2.18E-01 | 0.399051778 | 0.357174004 |
| GO:001025GO:001025endomembr3/65 | 468/18866 | 2.18E-01 | 0.399157773 | 0.357268875 |
| GO:000911GO:000911ribonucle1/65 | 72/18866  | 2.20E-01 | 0.399796226 | 0.357840327 |
| GO:000912GO:000912nucleosid1/65 | 72/18866  | 2.20E-01 | 0.399796226 | 0.357840327 |
| GO:001922GO:001922transmiss1/65 | 72/18866  | 2.20E-01 | 0.399796226 | 0.357840327 |
| GO:005193GO:005193catecholal/65 | 72/18866  | 2.20E-01 | 0.399796226 | 0.357840327 |
| GO:007098GO:007098demethylal/65 | 72/18866  | 2.20E-01 | 0.399796226 | 0.357840327 |
| GO:000801GO:000801regulatic2/65 | 256/18866 | 2.21E-01 | 0.399796226 | 0.357840327 |
| GO:003007GO:003007peptide h2/65 | 257/18866 | 2.22E-01 | 0.401540986 | 0.359401987 |
| GO:000270GO:000270regulatic1/65 | 73/18866  | 2.23E-01 | 0.402177233 | 0.359971464 |
| GO:005114GO:005114smooth mul/65 | 73/18866  | 2.23E-01 | 0.402177233 | 0.359971464 |
| GO:001095GO:001095negative 2/65 | 258/18866 | 2.23E-01 | 0.402177233 | 0.359971464 |
| GO:000761GO:000761learning 2/65 | 260/18866 | 2.26E-01 | 0.403695147 | 0.361330083 |
| GO:190336GO:190336regulatic2/65 | 260/18866 | 2.26E-01 | 0.403695147 | 0.361330083 |
| GO:002153GO:002153diencephal/65 | 74/18866  | 2.26E-01 | 0.403695147 | 0.361330083 |
| GO:003248GO:003248positive 1/65 | 74/18866  | 2.26E-01 | 0.403695147 | 0.361330083 |

|                                 |           |          |             |             |
|---------------------------------|-----------|----------|-------------|-------------|
| GO:00465CGO:004650glycerolil/65 | 74/18866  | 2.26E-01 | 0.403695147 | 0.361330083 |
| GO:190305GO:190305negative 1/65 | 74/18866  | 2.26E-01 | 0.403695147 | 0.361330083 |
| GO:00017CGO:000170mesoderm 1/65 | 75/18866  | 2.28E-01 | 0.405180394 | 0.362659463 |
| GO:000834GO:000834adult loc1/65 | 75/18866  | 2.28E-01 | 0.405180394 | 0.362659463 |
| GO:000906GO:000906glutamine1/65 | 75/18866  | 2.28E-01 | 0.405180394 | 0.362659463 |
| GO:00159CGO:001590long-chail/65 | 75/18866  | 2.28E-01 | 0.405180394 | 0.362659463 |
| GO:003085GO:003085positive 1/65 | 75/18866  | 2.28E-01 | 0.405180394 | 0.362659463 |
| GO:003241GO:003241lysosome 1/65 | 75/18866  | 2.28E-01 | 0.405180394 | 0.362659463 |
| GO:00083CGO:000830associatil/65 | 76/18866  | 2.31E-01 | 0.408170949 | 0.36533618  |
| GO:000958GO:000958detection1/65 | 76/18866  | 2.31E-01 | 0.408170949 | 0.36533618  |
| GO:190352GO:190352positive 1/65 | 76/18866  | 2.31E-01 | 0.408170949 | 0.36533618  |
| GO:003052GO:003052intracell2/65 | 265/18866 | 2.32E-01 | 0.408170949 | 0.36533618  |
| GO:003133GO:003133negative 2/65 | 265/18866 | 2.32E-01 | 0.408170949 | 0.36533618  |
| GO:001049GO:001049proteasom3/65 | 483/18866 | 2.32E-01 | 0.408170949 | 0.36533618  |
| GO:004232GO:004232negative 3/65 | 484/18866 | 2.33E-01 | 0.409231249 | 0.366285208 |
| GO:004833GO:004833mesoderm 1/65 | 77/18866  | 2.34E-01 | 0.409400879 | 0.366437037 |
| GO:015007GO:015007neuroinfl1/65 | 77/18866  | 2.34E-01 | 0.409400879 | 0.366437037 |
| GO:004688GO:004688regulatic2/65 | 267/18866 | 2.35E-01 | 0.409400879 | 0.366437037 |
| GO:001585GO:001585organic h2/65 | 268/18866 | 2.36E-01 | 0.409400879 | 0.366437037 |
| GO:003367GO:003367negative 2/65 | 268/18866 | 2.36E-01 | 0.409400879 | 0.366437037 |
| GO:000189GO:000189retina hc1/65 | 78/18866  | 2.36E-01 | 0.409400879 | 0.366437037 |
| GO:003043GO:003043ubiquitin1/65 | 78/18866  | 2.36E-01 | 0.409400879 | 0.366437037 |
| GO:004231GO:004231vasoconst1/65 | 78/18866  | 2.36E-01 | 0.409400879 | 0.366437037 |
| GO:004336GO:004336CD4-posit1/65 | 78/18866  | 2.36E-01 | 0.409400879 | 0.366437037 |
| GO:005068GO:005068regulatic1/65 | 78/18866  | 2.36E-01 | 0.409400879 | 0.366437037 |
| GO:006104GO:006104negative 1/65 | 78/18866  | 2.36E-01 | 0.409400879 | 0.366437037 |
| GO:00092CGO:000920purine ril/65 | 79/18866  | 2.39E-01 | 0.411807749 | 0.368591323 |
| GO:002167GO:002167nerve dev1/65 | 79/18866  | 2.39E-01 | 0.411807749 | 0.368591323 |
| GO:00301CGO:003010water hom1/65 | 79/18866  | 2.39E-01 | 0.411807749 | 0.368591323 |
| GO:007126GO:007126cellular 1/65 | 79/18866  | 2.39E-01 | 0.411807749 | 0.368591323 |
| GO:001046GO:001046negative 2/65 | 272/18866 | 2.41E-01 | 0.414420461 | 0.370929848 |
| GO:001403GO:001403neural cr1/65 | 80/18866  | 2.42E-01 | 0.415255523 | 0.371677276 |
| GO:003323GO:003323regulatic1/65 | 81/18866  | 2.44E-01 | 0.419215824 | 0.37522197  |
| GO:003019GO:003019regulatic1/65 | 82/18866  | 2.47E-01 | 0.423150495 | 0.378743724 |
| GO:009874GO:009874cell-cell2/65 | 277/18866 | 2.47E-01 | 0.423186369 | 0.378775833 |
| GO:004516GO:004516cell fate2/65 | 278/18866 | 2.49E-01 | 0.423753419 | 0.379283375 |
| GO:000271GO:000271regulatic1/65 | 83/18866  | 2.50E-01 | 0.423753419 | 0.379283375 |
| GO:004804GO:004804focal adh1/65 | 83/18866  | 2.50E-01 | 0.423753419 | 0.379283375 |
| GO:004814GO:004814regulatic1/65 | 83/18866  | 2.50E-01 | 0.423753419 | 0.379283375 |
| GO:005501GO:005501cardiac m1/65 | 83/18866  | 2.50E-01 | 0.423753419 | 0.379283375 |
| GO:190004GO:190004regulatic1/65 | 83/18866  | 2.50E-01 | 0.423753419 | 0.379283375 |
| GO:000151GO:000151RNA methyl/65 | 84/18866  | 2.52E-01 | 0.424330605 | 0.37979999  |
| GO:000865GO:000865cellular 1/65 | 84/18866  | 2.52E-01 | 0.424330605 | 0.37979999  |
| GO:001403GO:001403mesenchym1/65 | 84/18866  | 2.52E-01 | 0.424330605 | 0.37979999  |
| GO:001584GO:001584monoamine1/65 | 84/18866  | 2.52E-01 | 0.424330605 | 0.37979999  |
| GO:004814GO:004814fibroblas1/65 | 84/18866  | 2.52E-01 | 0.424330605 | 0.37979999  |
| GO:004886GO:004886stem cell1/65 | 84/18866  | 2.52E-01 | 0.424330605 | 0.37979999  |
| GO:009706GO:009706dendritic1/65 | 84/18866  | 2.52E-01 | 0.424330605 | 0.37979999  |
| GO:000919GO:000919ribonucle1/65 | 85/18866  | 2.55E-01 | 0.426328824 | 0.381588509 |
| GO:003541GO:003541protein 11/65 | 85/18866  | 2.55E-01 | 0.426328824 | 0.381588509 |
| GO:004315GO:004315negative 1/65 | 85/18866  | 2.55E-01 | 0.426328824 | 0.381588509 |

|                                 |           |          |             |             |
|---------------------------------|-----------|----------|-------------|-------------|
| GO:007050GO:007050calcium il/65 | 85/18866  | 2.55E-01 | 0.426328824 | 0.381588509 |
| GO:004665GO:004665lymphocyt2/65 | 283/18866 | 2.55E-01 | 0.426328824 | 0.381588509 |
| GO:000741GO:000741axon guid2/65 | 284/18866 | 2.56E-01 | 0.42734734  | 0.382500138 |
| GO:000691GO:000691activatic1/65 | 86/18866  | 2.57E-01 | 0.42734734  | 0.382500138 |
| GO:000719GO:000719adenylatel/65 | 86/18866  | 2.57E-01 | 0.42734734  | 0.382500138 |
| GO:009775GO:009775negative 1/65 | 86/18866  | 2.57E-01 | 0.42734734  | 0.382500138 |
| GO:200010GO:200010regulatic1/65 | 86/18866  | 2.57E-01 | 0.42734734  | 0.382500138 |
| GO:009748GO:009748neuron pr2/65 | 285/18866 | 2.58E-01 | 0.42734734  | 0.382500138 |
| GO:000724GO:000724I-kappaB 2/65 | 286/18866 | 2.59E-01 | 0.427816119 | 0.382919722 |
| GO:003294GO:003294mononucle2/65 | 286/18866 | 2.59E-01 | 0.427816119 | 0.382919722 |
| GO:014001GO:014001mitotic n2/65 | 286/18866 | 2.59E-01 | 0.427816119 | 0.382919722 |
| GO:000914GO:000914purine nul/65 | 87/18866  | 2.60E-01 | 0.427816119 | 0.382919722 |
| GO:003243GO:003243positive 1/65 | 87/18866  | 2.60E-01 | 0.427816119 | 0.382919722 |
| GO:190336GO:190336negative 1/65 | 87/18866  | 2.60E-01 | 0.427816119 | 0.382919722 |
| GO:006004GO:006004heart con2/65 | 287/18866 | 2.60E-01 | 0.427816119 | 0.382919722 |
| GO:000691GO:000691phagocytcl/65 | 88/18866  | 2.62E-01 | 0.428512411 | 0.383542944 |
| GO:000979GO:000979axis spec1/65 | 88/18866  | 2.62E-01 | 0.428512411 | 0.383542944 |
| GO:004647GO:004647phosphatil/65 | 88/18866  | 2.62E-01 | 0.428512411 | 0.383542944 |
| GO:004688GO:004688positive 1/65 | 88/18866  | 2.62E-01 | 0.428512411 | 0.383542944 |
| GO:005081GO:005081regulatic1/65 | 88/18866  | 2.62E-01 | 0.428512411 | 0.383542944 |
| GO:190331GO:190331negative 1/65 | 88/18866  | 2.62E-01 | 0.428512411 | 0.383542944 |
| GO:000189GO:000189embryonic1/65 | 89/18866  | 2.65E-01 | 0.430013315 | 0.384886338 |
| GO:000862GO:000862extrinsic1/65 | 89/18866  | 2.65E-01 | 0.430013315 | 0.384886338 |
| GO:001403GO:001403neural cr1/65 | 89/18866  | 2.65E-01 | 0.430013315 | 0.384886338 |
| GO:005500GO:005500cardiac cl/65 | 89/18866  | 2.65E-01 | 0.430013315 | 0.384886338 |
| GO:006105GO:006105somite del/65 | 89/18866  | 2.65E-01 | 0.430013315 | 0.384886338 |
| GO:007054GO:007054response 1/65 | 90/18866  | 2.68E-01 | 0.432918481 | 0.387486626 |
| GO:190335GO:190335cellular 1/65 | 90/18866  | 2.68E-01 | 0.432918481 | 0.387486626 |
| GO:000165GO:000165metanephrl/65 | 91/18866  | 2.70E-01 | 0.432918481 | 0.387486626 |
| GO:004247GO:004247odontogen1/65 | 91/18866  | 2.70E-01 | 0.432918481 | 0.387486626 |
| GO:004592GO:004592positive 1/65 | 91/18866  | 2.70E-01 | 0.432918481 | 0.387486626 |
| GO:005189GO:005189membrane 1/65 | 91/18866  | 2.70E-01 | 0.432918481 | 0.387486626 |
| GO:005195GO:005195regulatic1/65 | 91/18866  | 2.70E-01 | 0.432918481 | 0.387486626 |
| GO:006002GO:006002roof of n1/65 | 91/18866  | 2.70E-01 | 0.432918481 | 0.387486626 |
| GO:009730GO:009730cellular 1/65 | 91/18866  | 2.70E-01 | 0.432918481 | 0.387486626 |
| GO:190335GO:190335response 1/65 | 91/18866  | 2.70E-01 | 0.432918481 | 0.387486626 |
| GO:005134GO:005134negative 2/65 | 296/18866 | 2.72E-01 | 0.434802171 | 0.389172636 |
| GO:003134GO:003134regulatic1/65 | 92/18866  | 2.73E-01 | 0.435262257 | 0.389584439 |
| GO:010602GO:010602neuron pr1/65 | 92/18866  | 2.73E-01 | 0.435262257 | 0.389584439 |
| GO:000301GO:000301heart prc2/65 | 297/18866 | 2.73E-01 | 0.435262257 | 0.389584439 |
| GO:003114GO:003114SCF-depen1/65 | 93/18866  | 2.75E-01 | 0.436750117 | 0.390916158 |
| GO:006109GO:006109regulatic1/65 | 93/18866  | 2.75E-01 | 0.436750117 | 0.390916158 |
| GO:190303GO:190303negative 1/65 | 93/18866  | 2.75E-01 | 0.436750117 | 0.390916158 |
| GO:200011GO:200011negative 1/65 | 93/18866  | 2.75E-01 | 0.436750117 | 0.390916158 |
| GO:003430GO:003430primary al/65 | 94/18866  | 2.78E-01 | 0.439145153 | 0.393059851 |
| GO:190403GO:190403regulatic1/65 | 94/18866  | 2.78E-01 | 0.439145153 | 0.393059851 |
| GO:190595GO:190595positive 1/65 | 94/18866  | 2.78E-01 | 0.439145153 | 0.393059851 |
| GO:005089GO:005089cognition2/65 | 302/18866 | 2.79E-01 | 0.440981372 | 0.394703371 |
| GO:004881GO:004881regulatic1/65 | 95/18866  | 2.80E-01 | 0.440981372 | 0.394703371 |
| GO:009771GO:009771ciliary bl/65 | 95/18866  | 2.80E-01 | 0.440981372 | 0.394703371 |
| GO:190372GO:190372regulatic1/65 | 95/18866  | 2.80E-01 | 0.440981372 | 0.394703371 |

|                                 |           |          |             |             |
|---------------------------------|-----------|----------|-------------|-------------|
| GO:003031GO:003031flagellat1/65 | 96/18866  | 2.83E-01 | 0.442987148 | 0.396498655 |
| GO:009772GO:009772sperm mot1/65 | 96/18866  | 2.83E-01 | 0.442987148 | 0.396498655 |
| GO:000244GO:000244productic2/65 | 306/18866 | 2.84E-01 | 0.442987148 | 0.396498655 |
| GO:003571GO:003571CD4-posit1/65 | 97/18866  | 2.85E-01 | 0.442987148 | 0.396498655 |
| GO:00487CGO:00487Cembryonic1/65 | 97/18866  | 2.85E-01 | 0.442987148 | 0.396498655 |
| GO:005076GO:005076regulatic1/65 | 97/18866  | 2.85E-01 | 0.442987148 | 0.396498655 |
| GO:012016GO:012016positive 1/65 | 97/18866  | 2.85E-01 | 0.442987148 | 0.396498655 |
| GO:190165GO:190165cellular 1/65 | 97/18866  | 2.85E-01 | 0.442987148 | 0.396498655 |
| GO:190247GO:190247chloride 1/65 | 97/18866  | 2.85E-01 | 0.442987148 | 0.396498655 |
| GO:199082GO:199082response 1/65 | 97/18866  | 2.85E-01 | 0.442987148 | 0.396498655 |
| GO:199083GO:199083cellular 1/65 | 97/18866  | 2.85E-01 | 0.442987148 | 0.396498655 |
| GO:004206GO:004206gliogenes2/65 | 307/18866 | 2.86E-01 | 0.443308474 | 0.39678626  |
| GO:000683GO:000683dicarboxyl/65 | 98/18866  | 2.88E-01 | 0.445256727 | 0.398530057 |
| GO:001077GO:001077negative 1/65 | 98/18866  | 2.88E-01 | 0.445256727 | 0.398530057 |
| GO:001076GO:001076regulatic2/65 | 310/18866 | 2.89E-01 | 0.446973315 | 0.400066501 |
| GO:000704GO:000704cell-subsl/65 | 99/18866  | 2.90E-01 | 0.446973315 | 0.400066501 |
| GO:001071GO:001071regulatic1/65 | 99/18866  | 2.90E-01 | 0.446973315 | 0.400066501 |
| GO:001583GO:001583amine tral/65 | 99/18866  | 2.90E-01 | 0.446973315 | 0.400066501 |
| GO:003528GO:003528segmentat1/65 | 100/18866 | 2.93E-01 | 0.449709265 | 0.402515331 |
| GO:00365CGO:00365CERAD path1/65 | 100/18866 | 2.93E-01 | 0.449709265 | 0.402515331 |
| GO:007066GO:007066leukocyte2/65 | 313/18866 | 2.93E-01 | 0.449902331 | 0.402688137 |
| GO:190353GO:190353positive 2/65 | 313/18866 | 2.93E-01 | 0.449902331 | 0.402688137 |
| GO:004687GO:004687hormone s2/65 | 314/18866 | 2.95E-01 | 0.450320203 | 0.403062156 |
| GO:00159CGO:00159Cfatty acil/65 | 101/18866 | 2.95E-01 | 0.450320203 | 0.403062156 |
| GO:001921GO:001921regulatic1/65 | 101/18866 | 2.95E-01 | 0.450320203 | 0.403062156 |
| GO:004211GO:004211macrophagl/65 | 101/18866 | 2.95E-01 | 0.450320203 | 0.403062156 |
| GO:00226CGO:00226Cdigestivel/65 | 102/18866 | 2.97E-01 | 0.450910023 | 0.403590078 |
| GO:00331CGO:00331Cmitochondl/65 | 102/18866 | 2.97E-01 | 0.450910023 | 0.403590078 |
| GO:006099GO:006099dendritic1/65 | 102/18866 | 2.97E-01 | 0.450910023 | 0.403590078 |
| GO:015011GO:015011cell-subsl/65 | 102/18866 | 2.97E-01 | 0.450910023 | 0.403590078 |
| GO:190307GO:190307regulatic1/65 | 102/18866 | 2.97E-01 | 0.450910023 | 0.403590078 |
| GO:200006GO:200006positive 1/65 | 102/18866 | 2.97E-01 | 0.450910023 | 0.403590078 |
| GO:004866GO:004866positive 1/65 | 103/18866 | 3.00E-01 | 0.453454443 | 0.405867479 |
| GO:190189GO:190189positive 1/65 | 103/18866 | 3.00E-01 | 0.453454443 | 0.405867479 |
| GO:000941GO:000941response 2/65 | 319/18866 | 3.01E-01 | 0.453454443 | 0.405867479 |
| GO:000236GO:000236cytokine 1/65 | 104/18866 | 3.02E-01 | 0.453454443 | 0.405867479 |
| GO:000245GO:000245T cell mel/65 | 104/18866 | 3.02E-01 | 0.453454443 | 0.405867479 |
| GO:00033CGO:00033Ccardiac ml/65 | 104/18866 | 3.02E-01 | 0.453454443 | 0.405867479 |
| GO:00072CGO:00072Cphospholil/65 | 104/18866 | 3.02E-01 | 0.453454443 | 0.405867479 |
| GO:000911GO:000911nucleosidl/65 | 104/18866 | 3.02E-01 | 0.453454443 | 0.405867479 |
| GO:000282GO:000282positive 1/65 | 105/18866 | 3.05E-01 | 0.453454443 | 0.405867479 |
| GO:000763GO:000763feeding bl/65 | 105/18866 | 3.05E-01 | 0.453454443 | 0.405867479 |
| GO:00303CGO:00303Ccholesterl/65 | 105/18866 | 3.05E-01 | 0.453454443 | 0.405867479 |
| GO:004407GO:004407regulatic1/65 | 105/18866 | 3.05E-01 | 0.453454443 | 0.405867479 |
| GO:190241GO:190241protein ll/65 | 105/18866 | 3.05E-01 | 0.453454443 | 0.405867479 |
| GO:000989GO:000989negative 2/65 | 323/18866 | 3.06E-01 | 0.453454443 | 0.405867479 |
| GO:000991GO:000991hormone t2/65 | 323/18866 | 3.06E-01 | 0.453454443 | 0.405867479 |
| GO:00027CGO:00027Cpositive 1/65 | 106/18866 | 3.07E-01 | 0.453454443 | 0.405867479 |
| GO:001923GO:001923sensory pl/65 | 106/18866 | 3.07E-01 | 0.453454443 | 0.405867479 |
| GO:001939GO:001939fatty acil/65 | 106/18866 | 3.07E-01 | 0.453454443 | 0.405867479 |
| GO:003209GO:003209negative 1/65 | 106/18866 | 3.07E-01 | 0.453454443 | 0.405867479 |



|                                 |           |          |             |             |
|---------------------------------|-----------|----------|-------------|-------------|
| GO:003444GO:003444substrate1/65 | 106/1886€ | 3.07E-01 | 0.453454443 | 0.405867479 |
| GO:004663GO:004663alpha-bet1/65 | 106/1886€ | 3.07E-01 | 0.453454443 | 0.405867479 |
| GO:007186GO:007186cellular 1/65 | 106/1886€ | 3.07E-01 | 0.453454443 | 0.405867479 |
| GO:007187GO:007187cellular 1/65 | 106/1886€ | 3.07E-01 | 0.453454443 | 0.405867479 |
| GO:005123GO:005123maintenan2/65 | 324/1886€ | 3.07E-01 | 0.453454443 | 0.405867479 |
| GO:001489GO:001489striated 1/65 | 107/1886€ | 3.09E-01 | 0.454064251 | 0.406413291 |
| GO:003033GO:003033DNA damag1/65 | 107/1886€ | 3.09E-01 | 0.454064251 | 0.406413291 |
| GO:00344CGO:003440nucleobas1/65 | 107/1886€ | 3.09E-01 | 0.454064251 | 0.406413291 |
| GO:005196GO:005196regulatic1/65 | 107/1886€ | 3.09E-01 | 0.454064251 | 0.406413291 |
| GO:200123GO:200123negative 1/65 | 107/1886€ | 3.09E-01 | 0.454064251 | 0.406413291 |
| GO:000152GO:000152retinoid 1/65 | 108/1886€ | 3.12E-01 | 0.456049219 | 0.40818995  |
| GO:006007GO:006007Wnt signal/65 | 108/1886€ | 3.12E-01 | 0.456049219 | 0.40818995  |
| GO:007188GO:007188leukocyte1/65 | 108/1886€ | 3.12E-01 | 0.456049219 | 0.40818995  |
| GO:004211GO:004211B cell ac2/65 | 328/1886€ | 3.12E-01 | 0.45636118  | 0.408469174 |
| GO:000693GO:000693smooth mul/65 | 109/1886€ | 3.14E-01 | 0.456417779 | 0.408519832 |
| GO:001489GO:001489muscle hyl/65 | 109/1886€ | 3.14E-01 | 0.456417779 | 0.408519832 |
| GO:001895GO:001895phenol-cc1/65 | 109/1886€ | 3.14E-01 | 0.456417779 | 0.408519832 |
| GO:007137GO:007137cellular 2/65 | 330/1886€ | 3.15E-01 | 0.456417779 | 0.408519832 |
| GO:006056GO:006056epithelia2/65 | 331/1886€ | 3.16E-01 | 0.456417779 | 0.408519832 |
| GO:000282GO:000282positive 1/65 | 110/1886€ | 3.17E-01 | 0.456417779 | 0.408519832 |
| GO:000664GO:000664triglycer1/65 | 110/1886€ | 3.17E-01 | 0.456417779 | 0.408519832 |
| GO:007186GO:007186response 1/65 | 110/1886€ | 3.17E-01 | 0.456417779 | 0.408519832 |
| GO:007186GO:007186response 1/65 | 110/1886€ | 3.17E-01 | 0.456417779 | 0.408519832 |
| GO:00901CGO:009010positive 1/65 | 110/1886€ | 3.17E-01 | 0.456417779 | 0.408519832 |
| GO:009017GO:009017regulatic1/65 | 110/1886€ | 3.17E-01 | 0.456417779 | 0.408519832 |
| GO:19018CGO:190180positive 1/65 | 110/1886€ | 3.17E-01 | 0.456417779 | 0.408519832 |
| GO:00082CGO:000820steroid n2/65 | 332/1886€ | 3.18E-01 | 0.457190472 | 0.409211437 |
| GO:000682GO:000682chloride 1/65 | 111/1886€ | 3.19E-01 | 0.457825491 | 0.409779815 |
| GO:003444GO:003444lipid oxil/65 | 111/1886€ | 3.19E-01 | 0.457825491 | 0.409779815 |
| GO:006029GO:006029cilium mc1/65 | 111/1886€ | 3.19E-01 | 0.457825491 | 0.409779815 |
| GO:001092GO:001092cellular 1/65 | 112/1886€ | 3.21E-01 | 0.460710113 | 0.412361715 |
| GO:00161CGO:001610diterpenc1/65 | 114/1886€ | 3.26E-01 | 0.466933557 | 0.417932051 |
| GO:005104GO:005104positive 2/65 | 340/1886€ | 3.28E-01 | 0.468718819 | 0.419529962 |
| GO:003044GO:003044regulatic1/65 | 115/1886€ | 3.28E-01 | 0.468748542 | 0.419556566 |
| GO:005122GO:005122spindle al/65 | 115/1886€ | 3.28E-01 | 0.468748542 | 0.419556566 |
| GO:00229CGO:002290respiratc1/65 | 116/1886€ | 3.31E-01 | 0.471049654 | 0.421616192 |
| GO:004691GO:004691cellular 1/65 | 116/1886€ | 3.31E-01 | 0.471049654 | 0.421616192 |
| GO:005134GO:005134regulatic1/65 | 117/1886€ | 3.33E-01 | 0.473329533 | 0.423656813 |
| GO:190401GO:190401epithelial/65 | 117/1886€ | 3.33E-01 | 0.473329533 | 0.423656813 |
| GO:00068CGO:000680xenobiotil/65 | 118/1886€ | 3.35E-01 | 0.474565583 | 0.424763148 |
| GO:000705GO:000705mitotic sl/65 | 118/1886€ | 3.35E-01 | 0.474565583 | 0.424763148 |
| GO:001591GO:001591sterol tr1/65 | 118/1886€ | 3.35E-01 | 0.474565583 | 0.424763148 |
| GO:003355GO:003355unsaturat1/65 | 118/1886€ | 3.35E-01 | 0.474565583 | 0.424763148 |
| GO:001082GO:001082positive 1/65 | 119/1886€ | 3.38E-01 | 0.47731305  | 0.427222287 |
| GO:190406GO:190406regulatic2/65 | 349/1886€ | 3.39E-01 | 0.478734052 | 0.428494164 |
| GO:000206GO:000206columnar1/65  | 121/1886€ | 3.42E-01 | 0.482240195 | 0.431632361 |
| GO:009866GO:009866inorganic1/65 | 121/1886€ | 3.42E-01 | 0.482240195 | 0.431632361 |
| GO:000153GO:000153cilium or1/65 | 122/1886€ | 3.45E-01 | 0.482355155 | 0.431735257 |
| GO:000669GO:000669icosanoid1/65 | 122/1886€ | 3.45E-01 | 0.482355155 | 0.431735257 |
| GO:001081GO:001081positive 1/65 | 122/1886€ | 3.45E-01 | 0.482355155 | 0.431735257 |
| GO:002178GO:002178glial cell/65 | 122/1886€ | 3.45E-01 | 0.482355155 | 0.431735257 |

|                                 |           |          |             |             |
|---------------------------------|-----------|----------|-------------|-------------|
| GO:004275GO:004275regulaticl/65 | 122/1886€ | 3.45E-01 | 0.482355155 | 0.431735257 |
| GO:006028GO:006028cilium-del/65 | 122/1886€ | 3.45E-01 | 0.482355155 | 0.431735257 |
| GO:000276GO:000276regulaticl/65 | 123/1886€ | 3.47E-01 | 0.483479981 | 0.43274204  |
| GO:004867GO:004867axon extel/65 | 123/1886€ | 3.47E-01 | 0.483479981 | 0.43274204  |
| GO:007146GO:007146cellular 1/65 | 123/1886€ | 3.47E-01 | 0.483479981 | 0.43274204  |
| GO:190437GO:190437regulaticl/65 | 123/1886€ | 3.47E-01 | 0.483479981 | 0.43274204  |
| GO:000173GO:000173establishl/65 | 124/1886€ | 3.49E-01 | 0.48458454  | 0.433730683 |
| GO:000269GO:000269negative 1/65 | 124/1886€ | 3.49E-01 | 0.48458454  | 0.433730683 |
| GO:000672GO:000672terpenoidl/65 | 124/1886€ | 3.49E-01 | 0.48458454  | 0.433730683 |
| GO:000716GO:000716establishl/65 | 124/1886€ | 3.49E-01 | 0.48458454  | 0.433730683 |
| GO:000195GO:000195regulaticl/65 | 125/1886€ | 3.51E-01 | 0.485536035 | 0.434582326 |
| GO:000863GO:000863apoptoticl/65 | 125/1886€ | 3.51E-01 | 0.485536035 | 0.434582326 |
| GO:003247GO:003247regulaticl/65 | 125/1886€ | 3.51E-01 | 0.485536035 | 0.434582326 |
| GO:000166GO:000166response 2/65 | 359/1886€ | 3.52E-01 | 0.485536035 | 0.434582326 |
| GO:000717GO:000717transmemb2/65 | 359/1886€ | 3.52E-01 | 0.485536035 | 0.434582326 |
| GO:005500GO:005500cardiac ml/65 | 126/1886€ | 3.54E-01 | 0.487754427 | 0.436567912 |
| GO:000170GO:000170formationl/65 | 127/1886€ | 3.56E-01 | 0.487779509 | 0.436590362 |
| GO:001701GO:001701regulaticl/65 | 127/1886€ | 3.56E-01 | 0.487779509 | 0.436590362 |
| GO:003032GO:003032embryonicl/65 | 127/1886€ | 3.56E-01 | 0.487779509 | 0.436590362 |
| GO:003260GO:003260type I inl/65 | 127/1886€ | 3.56E-01 | 0.487779509 | 0.436590362 |
| GO:003511GO:003511embryonicl/65 | 127/1886€ | 3.56E-01 | 0.487779509 | 0.436590362 |
| GO:190305GO:190305positive 1/65 | 127/1886€ | 3.56E-01 | 0.487779509 | 0.436590362 |
| GO:004368GO:004368post-tran2/65 | 363/1886€ | 3.57E-01 | 0.488347758 | 0.437098977 |
| GO:000004GO:000004transiticl/65 | 129/1886€ | 3.60E-01 | 0.49184579  | 0.440229914 |
| GO:000257GO:000257platelet 1/65 | 129/1886€ | 3.60E-01 | 0.49184579  | 0.440229914 |
| GO:190384GO:190384regulaticl/65 | 129/1886€ | 3.60E-01 | 0.49184579  | 0.440229914 |
| GO:000941GO:000941response 1/65 | 130/1886€ | 3.63E-01 | 0.493850742 | 0.44202446  |
| GO:004870GO:004870embryonicl/65 | 130/1886€ | 3.63E-01 | 0.493850742 | 0.44202446  |
| GO:004586GO:004586negative 2/65 | 369/1886€ | 3.64E-01 | 0.495325403 | 0.443344366 |
| GO:003243GO:003243regulaticl/65 | 131/1886€ | 3.65E-01 | 0.495325403 | 0.443344366 |
| GO:004410GO:004410cellular 1/65 | 131/1886€ | 3.65E-01 | 0.495325403 | 0.443344366 |
| GO:004586GO:004586positive 2/65 | 370/1886€ | 3.65E-01 | 0.495656264 | 0.443640505 |
| GO:003629GO:003629response 2/65 | 371/1886€ | 3.67E-01 | 0.496780733 | 0.444646969 |
| GO:004247GO:004247odontogenl/65 | 132/1886€ | 3.67E-01 | 0.496780733 | 0.444646969 |
| GO:004217GO:004217negative 1/65 | 133/1886€ | 3.69E-01 | 0.49872846  | 0.446390295 |
| GO:004277GO:004277signal trl/65 | 133/1886€ | 3.69E-01 | 0.49872846  | 0.446390295 |
| GO:000292GO:000292regulaticl/65 | 134/1886€ | 3.71E-01 | 0.499123894 | 0.446744231 |
| GO:004328GO:004328positive 1/65 | 134/1886€ | 3.71E-01 | 0.499123894 | 0.446744231 |
| GO:004599GO:004599regulaticl/65 | 134/1886€ | 3.71E-01 | 0.499123894 | 0.446744231 |
| GO:004668GO:004668response 1/65 | 134/1886€ | 3.71E-01 | 0.499123894 | 0.446744231 |
| GO:004671GO:004671viral entl/65 | 134/1886€ | 3.71E-01 | 0.499123894 | 0.446744231 |
| GO:003167GO:003167I band 5/67   | 140/19559 | 1.18E-04 | 0.00894573  | 0.008440451 |
| GO:003001GO:003001myofibril6/67 | 227/19559 | 1.26E-04 | 0.00894573  | 0.008440451 |
| GO:004329GO:004329contracti6/67 | 238/19559 | 1.64E-04 | 0.00894573  | 0.008440451 |
| GO:003001GO:003001sarcomere5/67 | 207/19559 | 7.17E-04 | 0.029416263 | 0.027754754 |
| GO:003259GO:003259dendrite 2/67 | 43/19559  | 9.54E-03 | 0.264323096 | 0.249393422 |
| GO:003001GO:003001Z disc 3/67   | 128/19559 | 9.67E-03 | 0.264323096 | 0.249393422 |
| GO:004665GO:004665anchored 2/67 | 60/19559  | 1.80E-02 | 0.364213178 | 0.343641445 |
| GO:003258GO:003258neuron pr2/67 | 61/19559  | 1.86E-02 | 0.364213178 | 0.343641445 |
| GO:015003GO:015003distal ax4/67 | 309/19559 | 2.15E-02 | 0.364213178 | 0.343641445 |
| GO:003125GO:003125leading e3/67 | 175/19559 | 2.22E-02 | 0.364213178 | 0.343641445 |

|                                 |           |          |             |             |
|---------------------------------|-----------|----------|-------------|-------------|
| GO:003042GO:003042growth cc3/67 | 184/19559 | 2.53E-02 | 0.376956148 | 0.355664659 |
| GO:003042GO:003042site of p3/67 | 191/19559 | 2.78E-02 | 0.380298506 | 0.358818231 |
| GO:003125GO:003125cell proj4/67 | 344/19559 | 3.03E-02 | 0.382414466 | 0.360814676 |
| GO:009898GO:009898cholinerg1/67 | 10/19559  | 3.37E-02 | 0.395236794 | 0.372912765 |
| GO:199045GO:199045L-type vc1/67 | 12/19559  | 4.04E-02 | 0.413606405 | 0.390244811 |
| GO:199090GO:199090Wnt signal/67 | 12/19559  | 4.04E-02 | 0.413606405 | 0.390244811 |
| GO:009869GO:009869dopaminer1/67 | 13/19559  | 4.36E-02 | 0.421008924 | 0.397229216 |
| GO:003067GO:003067axolemma 1/67 | 15/19559  | 5.02E-02 | 0.422581535 | 0.398713001 |
| GO:003259GO:003259dendritic1/67 | 15/19559  | 5.02E-02 | 0.422581535 | 0.398713001 |
| GO:000589GO:000589acetylchc1/67 | 16/19559  | 5.34E-02 | 0.422581535 | 0.398713001 |
| GO:004511GO:004511intermedi3/67 | 251/19559 | 5.49E-02 | 0.422581535 | 0.398713001 |
| GO:004259GO:004259lamellar 1/67 | 17/19559  | 5.67E-02 | 0.422581535 | 0.398713001 |
| GO:004517GO:004517apical pa4/67 | 433/19559 | 6.11E-02 | 0.431491926 | 0.407120109 |
| GO:003136GO:003136anchored 1/67 | 19/19559  | 6.31E-02 | 0.431491926 | 0.407120109 |
| GO:001646GO:001646myosin III/67 | 20/19559  | 6.64E-02 | 0.435305249 | 0.410718047 |
| GO:007178GO:007178endoplasm1/67 | 22/19559  | 7.27E-02 | 0.437700549 | 0.412978053 |
| GO:003123GO:003123intrinsic1/67 | 24/19559  | 7.91E-02 | 0.437700549 | 0.412978053 |
| GO:004432GO:004432endoplasm1/67 | 24/19559  | 7.91E-02 | 0.437700549 | 0.412978053 |
| GO:003143GO:003143M band 1/67   | 25/19559  | 8.23E-02 | 0.437700549 | 0.412978053 |
| GO:003470GO:003470ion chann3/67 | 299/19559 | 8.31E-02 | 0.437700549 | 0.412978053 |
| GO:000208GO:000208acrosomal1/67 | 26/19559  | 8.54E-02 | 0.437700549 | 0.412978053 |
| GO:009882GO:009882endoplasm1/67 | 26/19559  | 8.54E-02 | 0.437700549 | 0.412978053 |
| GO:003280GO:003280neuronal 1/67 | 28/19559  | 9.17E-02 | 0.45556554  | 0.429833982 |
| GO:190249GO:190249transmemb3/67 | 322/19559 | 9.84E-02 | 0.460043048 | 0.434058588 |
| GO:000830GO:000830integrin 1/67 | 31/19559  | 1.01E-01 | 0.460043048 | 0.434058588 |
| GO:004429GO:004429cell body1/67 | 31/19559  | 1.01E-01 | 0.460043048 | 0.434058588 |
| GO:199035GO:199035transport3/67 | 330/19559 | 1.04E-01 | 0.460682413 | 0.43466184  |
| GO:003194GO:003194filamentc1/67 | 34/19559  | 1.10E-01 | 0.465606975 | 0.43930825  |
| GO:009858GO:009858membrane 3/67 | 343/19559 | 1.13E-01 | 0.465606975 | 0.43930825  |
| GO:009863GO:009863protein c1/67 | 36/19559  | 1.16E-01 | 0.465606975 | 0.43930825  |
| GO:003122GO:003122anchored 2/67 | 171/19559 | 1.16E-01 | 0.465606975 | 0.43930825  |
| GO:003167GO:003167A band 1/67   | 37/19559  | 1.19E-01 | 0.465979976 | 0.439660183 |
| GO:009957GO:009957postsynap3/67 | 361/19559 | 1.27E-01 | 0.483061889 | 0.455777264 |
| GO:000455GO:000455nucleosid2/68 | 18/18352  | 1.99E-03 | 0.291822751 | 0.271566557 |
| GO:000372GO:000372double-st3/68 | 76/18352  | 2.82E-03 | 0.291822751 | 0.271566557 |
| GO:007056GO:007056adenylt2/68   | 31/18352  | 5.87E-03 | 0.299065892 | 0.278306932 |
| GO:001677GO:001677phosphotr2/68 | 40/18352  | 9.64E-03 | 0.299065892 | 0.278306932 |
| GO:001920GO:001920nucleobas2/68 | 43/18352  | 1.11E-02 | 0.299065892 | 0.278306932 |
| GO:004362GO:004362protein s2/68 | 57/18352  | 1.89E-02 | 0.299065892 | 0.278306932 |
| GO:003329GO:003329monocarbc2/68 | 72/18352  | 2.93E-02 | 0.299065892 | 0.278306932 |
| GO:000401GO:000401adenylate1/68 | 10/18352  | 3.65E-02 | 0.299065892 | 0.278306932 |
| GO:000833GO:000833high volt1/68 | 10/18352  | 3.65E-02 | 0.299065892 | 0.278306932 |
| GO:000851GO:000851ammonium 1/68 | 10/18352  | 3.65E-02 | 0.299065892 | 0.278306932 |
| GO:001953GO:001953oxalate t1/68 | 10/18352  | 3.65E-02 | 0.299065892 | 0.278306932 |
| GO:003205GO:003205bile acid1/68 | 10/18352  | 3.65E-02 | 0.299065892 | 0.278306932 |
| GO:000522GO:000522intracell1/68 | 11/18352  | 4.00E-02 | 0.299065892 | 0.278306932 |
| GO:004385GO:004385cyclic nu1/68 | 11/18352  | 4.00E-02 | 0.299065892 | 0.278306932 |
| GO:000403GO:000403alditol:N1/68 | 12/18352  | 4.36E-02 | 0.299065892 | 0.278306932 |
| GO:000817GO:000817mRNA meth1/68 | 12/18352  | 4.36E-02 | 0.299065892 | 0.278306932 |
| GO:004679GO:004679virion bil/68 | 12/18352  | 4.36E-02 | 0.299065892 | 0.278306932 |
| GO:000372GO:000372single-st2/68 | 90/18352  | 4.40E-02 | 0.299065892 | 0.278306932 |

|                                 |           |          |             |             |
|---------------------------------|-----------|----------|-------------|-------------|
| GO:00314CGO:003140carboxyli3/68 | 212/18352 | 4.41E-02 | 0.299065892 | 0.278306932 |
| GO:000817GO:000817adenylate1/68 | 13/18352  | 4.71E-02 | 0.299065892 | 0.278306932 |
| GO:000827GO:000827secondary1/68 | 13/18352  | 4.71E-02 | 0.299065892 | 0.278306932 |
| GO:003203GO:003203myosin hel/68 | 13/18352  | 4.71E-02 | 0.299065892 | 0.278306932 |
| GO:003245GO:003245histone d1/68 | 13/18352  | 4.71E-02 | 0.299065892 | 0.278306932 |
| GO:004216GO:004216acetylchc1/68 | 13/18352  | 4.71E-02 | 0.299065892 | 0.278306932 |
| GO:004317GO:004317organic a3/68 | 224/18352 | 5.04E-02 | 0.299065892 | 0.278306932 |
| GO:003028GO:003028structural/68 | 14/18352  | 5.07E-02 | 0.299065892 | 0.278306932 |
| GO:000465GO:000465polynucle1/68 | 15/18352  | 5.42E-02 | 0.299065892 | 0.278306932 |
| GO:003604GO:003604long-chail/68 | 15/18352  | 5.42E-02 | 0.299065892 | 0.278306932 |
| GO:000552GO:000552tropomyos1/68 | 16/18352  | 5.77E-02 | 0.299065892 | 0.278306932 |
| GO:002284GO:002284acetylchc1/68 | 16/18352  | 5.77E-02 | 0.299065892 | 0.278306932 |
| GO:19904CGO:199040protein A1/68 | 16/18352  | 5.77E-02 | 0.299065892 | 0.278306932 |
| GO:009909GO:009909ligand-ga2/68 | 108/18352 | 6.08E-02 | 0.299065892 | 0.278306932 |
| GO:000532GO:000532long-chail/68 | 17/18352  | 6.12E-02 | 0.299065892 | 0.278306932 |
| GO:001511GO:001511sulfate t1/68 | 17/18352  | 6.12E-02 | 0.299065892 | 0.278306932 |
| GO:001664GO:001664oxidoredu1/68 | 18/18352  | 6.47E-02 | 0.299065892 | 0.278306932 |
| GO:000033GO:000033RNA cap b1/68 | 19/18352  | 6.81E-02 | 0.299065892 | 0.278306932 |
| GO:00305CGO:003050ankyrin b1/68 | 20/18352  | 7.16E-02 | 0.299065892 | 0.278306932 |
| GO:003509GO:003509phosphati3/68 | 262/18352 | 7.33E-02 | 0.299065892 | 0.278306932 |
| GO:00081CGO:000810alcohol d1/68 | 21/18352  | 7.50E-02 | 0.299065892 | 0.278306932 |
| GO:00151CGO:001510bicarbona1/68 | 21/18352  | 7.50E-02 | 0.299065892 | 0.278306932 |
| GO:004216GO:004216neurotran1/68 | 21/18352  | 7.50E-02 | 0.299065892 | 0.278306932 |
| GO:005014GO:005014nucleosid1/68 | 21/18352  | 7.50E-02 | 0.299065892 | 0.278306932 |
| GO:000521GO:000521ion chann4/68 | 431/18352 | 7.57E-02 | 0.299065892 | 0.278306932 |
| GO:000997GO:000997cyclase a1/68 | 22/18352  | 7.85E-02 | 0.299065892 | 0.278306932 |
| GO:001503GO:001503protein d1/68 | 22/18352  | 7.85E-02 | 0.299065892 | 0.278306932 |
| GO:001546GO:001546acetylchc1/68 | 22/18352  | 7.85E-02 | 0.299065892 | 0.278306932 |
| GO:001684GO:001684phosphoru1/68 | 22/18352  | 7.85E-02 | 0.299065892 | 0.278306932 |
| GO:000817GO:0008170-methylt1/68 | 23/18352  | 8.19E-02 | 0.299065892 | 0.278306932 |
| GO:01401CGO:014010catalytic1/68 | 23/18352  | 8.19E-02 | 0.299065892 | 0.278306932 |
| GO:000395GO:000395NAD+ ADP-1/68 | 24/18352  | 8.53E-02 | 0.299065892 | 0.278306932 |
| GO:000521GO:000521structural/68 | 24/18352  | 8.53E-02 | 0.299065892 | 0.278306932 |
| GO:001677GO:001677nucleotid2/68 | 133/18352 | 8.72E-02 | 0.299065892 | 0.278306932 |
| GO:005186GO:005186glycolipil/68 | 25/18352  | 8.87E-02 | 0.299065892 | 0.278306932 |
| GO:000826GO:000826poly(U) R1/68 | 26/18352  | 9.21E-02 | 0.299065892 | 0.278306932 |
| GO:001662GO:001662oxidoredu1/68 | 26/18352  | 9.21E-02 | 0.299065892 | 0.278306932 |
| GO:001527GO:001527ligand-ga2/68 | 139/18352 | 9.39E-02 | 0.299065892 | 0.278306932 |
| GO:002283GO:002283ligand-ga2/68 | 139/18352 | 9.39E-02 | 0.299065892 | 0.278306932 |
| GO:002284GO:002284voltage-g2/68 | 140/18352 | 9.51E-02 | 0.299065892 | 0.278306932 |
| GO:000403GO:000403aldo-ketc1/68 | 27/18352  | 9.54E-02 | 0.299065892 | 0.278306932 |
| GO:00153CGO:001530anion:anil/68 | 28/18352  | 9.88E-02 | 0.299065892 | 0.278306932 |
| GO:001664GO:001664oxidoredu1/68 | 28/18352  | 9.88E-02 | 0.299065892 | 0.278306932 |
| GO:003245GO:003245histone d1/68 | 28/18352  | 9.88E-02 | 0.299065892 | 0.278306932 |
| GO:004301GO:004301gamma-tubl/68 | 28/18352  | 9.88E-02 | 0.299065892 | 0.278306932 |
| GO:014032GO:014032solute:an1/68 | 28/18352  | 9.88E-02 | 0.299065892 | 0.278306932 |
| GO:014045GO:014045protein d1/68 | 28/18352  | 9.88E-02 | 0.299065892 | 0.278306932 |
| GO:001526GO:001526channel a4/68 | 479/18352 | 1.02E-01 | 0.299065892 | 0.278306932 |
| GO:000521GO:000521intracell1/68 | 29/18352  | 1.02E-01 | 0.299065892 | 0.278306932 |
| GO:000818GO:000818poly-pyri1/68 | 29/18352  | 1.02E-01 | 0.299065892 | 0.278306932 |
| GO:00228CGO:002280passive t4/68 | 480/18352 | 1.02E-01 | 0.299065892 | 0.278306932 |

|                                 |           |          |             |             |
|---------------------------------|-----------|----------|-------------|-------------|
| GO:000523GO:000523excitator1/68 | 30/18352  | 1.05E-01 | 0.299065892 | 0.278306932 |
| GO:000815GO:000815protein p1/68 | 30/18352  | 1.05E-01 | 0.299065892 | 0.278306932 |
| GO:003376GO:003376steroid d1/68 | 30/18352  | 1.05E-01 | 0.299065892 | 0.278306932 |
| GO:004696GO:004696thyroid h1/68 | 30/18352  | 1.05E-01 | 0.299065892 | 0.278306932 |
| GO:000516GO:000516tumor nec1/68 | 31/18352  | 1.09E-01 | 0.304311359 | 0.283188298 |
| GO:000525GO:000525delayed r1/68 | 33/18352  | 1.15E-01 | 0.318479613 | 0.296373095 |
| GO:001622GO:001622steroid d1/68 | 34/18352  | 1.19E-01 | 0.32323275  | 0.300796304 |
| GO:004280GO:004280actinin b1/68 | 36/18352  | 1.25E-01 | 0.336471874 | 0.313116466 |
| GO:000526GO:000526cation ch3/68 | 334/18352 | 1.27E-01 | 0.336471874 | 0.313116466 |
| GO:002283GO:002283gated cha3/68 | 337/18352 | 1.29E-01 | 0.336471874 | 0.313116466 |
| GO:000510GO:000510frizzled 1/68 | 38/18352  | 1.32E-01 | 0.336471874 | 0.313116466 |
| GO:003245GO:003245demethyla1/68 | 38/18352  | 1.32E-01 | 0.336471874 | 0.313116466 |
| GO:000531GO:000531dicarboxyl/68 | 39/18352  | 1.35E-01 | 0.336471874 | 0.313116466 |
| GO:000550GO:000550fatty acil/68 | 39/18352  | 1.35E-01 | 0.336471874 | 0.313116466 |
| GO:001503GO:001503disulfide1/68 | 41/18352  | 1.41E-01 | 0.347845121 | 0.323700265 |
| GO:005153GO:0051534 iron, 41/68 | 42/18352  | 1.45E-01 | 0.347845121 | 0.323700265 |
| GO:190168GO:190168sulfur cc1/68 | 42/18352  | 1.45E-01 | 0.347845121 | 0.323700265 |
| GO:000830GO:000830structural/68 | 43/18352  | 1.48E-01 | 0.351406241 | 0.327014199 |
| GO:000524GO:000524voltage-g1/68 | 44/18352  | 1.51E-01 | 0.354859078 | 0.330227365 |
| GO:001670GO:001670oxidoredu1/68 | 45/18352  | 1.54E-01 | 0.35820738  | 0.333343253 |
| GO:000837GO:000837acetylga11/68 | 47/18352  | 1.60E-01 | 0.358255903 | 0.333388407 |
| GO:190431GO:190431transmitt1/68 | 47/18352  | 1.60E-01 | 0.358255903 | 0.333388407 |
| GO:000371GO:000371transcrip2/68 | 194/18352 | 1.62E-01 | 0.358255903 | 0.333388407 |
| GO:003281GO:003281tumor nec1/68 | 48/18352  | 1.63E-01 | 0.358255903 | 0.333388407 |
| GO:000524GO:000524voltage-g2/68 | 197/18352 | 1.66E-01 | 0.358255903 | 0.333388407 |
| GO:002283GO:002283voltage-g2/68 | 197/18352 | 1.66E-01 | 0.358255903 | 0.333388407 |
| GO:000551GO:000551calmoduli2/68 | 200/18352 | 1.70E-01 | 0.358255903 | 0.333388407 |
| GO:001676GO:001676transferal/68 | 50/18352  | 1.70E-01 | 0.358255903 | 0.333388407 |
| GO:009952GO:009952neurotran1/68 | 50/18352  | 1.70E-01 | 0.358255903 | 0.333388407 |
| GO:001659GO:001659amino acil/68 | 59/18352  | 1.97E-01 | 0.394203573 | 0.366840854 |
| GO:001662GO:001662oxidoredu1/68 | 59/18352  | 1.97E-01 | 0.394203573 | 0.366840854 |
| GO:001666GO:001666oxidoredu1/68 | 59/18352  | 1.97E-01 | 0.394203573 | 0.366840854 |
| GO:000550GO:000550copper ic1/68 | 60/18352  | 2.00E-01 | 0.394203573 | 0.366840854 |
| GO:002282GO:002282transmitt1/68 | 60/18352  | 2.00E-01 | 0.394203573 | 0.366840854 |
| GO:002283GO:002283transmitt1/68 | 60/18352  | 2.00E-01 | 0.394203573 | 0.366840854 |
| GO:009711GO:009711scaffold 1/68 | 60/18352  | 2.00E-01 | 0.394203573 | 0.366840854 |
| GO:001665GO:001665oxidoredu1/68 | 61/18352  | 2.03E-01 | 0.396292648 | 0.36878492  |
| GO:009896GO:009896postsynap1/68 | 65/18352  | 2.15E-01 | 0.411295674 | 0.382746546 |
| GO:000512GO:000512cytokine 2/68 | 235/18352 | 2.16E-01 | 0.411295674 | 0.382746546 |
| GO:000004GO:000004tRNA bind1/68 | 66/18352  | 2.18E-01 | 0.411295674 | 0.382746546 |
| GO:005153GO:005153iron-sulf1/68 | 67/18352  | 2.21E-01 | 0.411295674 | 0.382746546 |
| GO:005154GO:005154metal clu1/68 | 67/18352  | 2.21E-01 | 0.411295674 | 0.382746546 |
| GO:000817GO:000817RNA methyl/68 | 69/18352  | 2.26E-01 | 0.418318573 | 0.389281967 |
| GO:001702GO:001702myosin bil/68 | 72/18352  | 2.35E-01 | 0.42801021  | 0.398300882 |
| GO:000554GO:000554phospholi3/68 | 454/18352 | 2.37E-01 | 0.42801021  | 0.398300882 |
| GO:004836GO:004836Rac GTPas1/68 | 73/18352  | 2.38E-01 | 0.42801021  | 0.398300882 |
| GO:000523GO:000523extracell1/68 | 74/18352  | 2.41E-01 | 0.429380428 | 0.399575989 |
| GO:000525GO:000525chloride 1/68 | 75/18352  | 2.43E-01 | 0.430708834 | 0.400812188 |
| GO:000372GO:000372RNA helic1/68 | 77/18352  | 2.49E-01 | 0.436916254 | 0.406588734 |
| GO:000801GO:000801microtubu2/68 | 265/18352 | 2.58E-01 | 0.44564956  | 0.414715838 |
| GO:000554GO:000554phosphatil/68 | 82/18352  | 2.63E-01 | 0.44564956  | 0.414715838 |

|                                 |           |          |             |             |
|---------------------------------|-----------|----------|-------------|-------------|
| GO:001529GO:001529antiportel/68 | 83/18352  | 2.66E-01 | 0.44564956  | 0.414715838 |
| GO:000512GO:000512cytokine 2/68 | 271/18352 | 2.66E-01 | 0.44564956  | 0.414715838 |
| GO:004801GO:004801receptor 3/68 | 487/18352 | 2.70E-01 | 0.44564956  | 0.414715838 |
| GO:000801GO:000801beta-cate1/68 | 85/18352  | 2.71E-01 | 0.44564956  | 0.414715838 |
| GO:005121GO:005121phosphopr1/68 | 85/18352  | 2.71E-01 | 0.44564956  | 0.414715838 |
| GO:001675GO:001675transfera2/68 | 275/18352 | 2.71E-01 | 0.44564956  | 0.414715838 |
| GO:003054GO:003054signaling3/68 | 492/18352 | 2.75E-01 | 0.447230947 | 0.416187456 |
| GO:000525GO:000525anion chal/68 | 87/18352  | 2.77E-01 | 0.447230947 | 0.416187456 |
| GO:000524GO:000524voltage-g1/68 | 88/18352  | 2.79E-01 | 0.448085985 | 0.416983144 |
| GO:006163GO:006163ubiquitin2/68 | 292/18352 | 2.95E-01 | 0.467740989 | 0.435273841 |
| GO:000166GO:000166G protein2/68 | 293/18352 | 2.96E-01 | 0.467740989 | 0.435273841 |
| GO:000486GO:000486serine-tyl/68 | 98/18352  | 3.06E-01 | 0.477779438 | 0.444615495 |
| GO:006165GO:006165ubiquitin2/68 | 301/18352 | 3.07E-01 | 0.477779438 | 0.444615495 |
| GO:000449GO:000449monooxyge1/68 | 101/18352 | 3.13E-01 | 0.484086117 | 0.450484411 |
| GO:00151CGO:00151Cchloride 1/68 | 102/18352 | 3.16E-01 | 0.484422963 | 0.450797876 |
| GO:000814GO:000814drug bind1/68 | 104/18352 | 3.21E-01 | 0.488605849 | 0.454690417 |
| GO:000549GO:000549steroid b1/68 | 106/18352 | 3.26E-01 | 0.489101236 | 0.455151417 |
| GO:003149GO:003149chromatin1/68 | 106/18352 | 3.26E-01 | 0.489101236 | 0.455151417 |
| GO:004748GO:004748protein N1/68 | 107/18352 | 3.29E-01 | 0.48932288  | 0.455357676 |
| GO:001665GO:001665oxidoredu1/68 | 109/18352 | 3.34E-01 | 0.493214137 | 0.45897883  |
| GO:003059GO:003059neurotran1/68 | 111/18352 | 3.39E-01 | 0.496996426 | 0.462498581 |
| GO:190438GO:190438endoplasm2/69 | 17/18866  | 0.00173  | 0.4051285   | 0.3941115   |
| GO:00365CGO:00365Cprotein d2/69 | 21/18866  | 0.002647 | 0.4051285   | 0.3941115   |
| GO:00365CGO:00365Cprotein a2/69 | 21/18866  | 0.002647 | 0.4051285   | 0.3941115   |
| GO:004802GO:004802negative 2/69 | 22/18866  | 0.002905 | 0.4051285   | 0.3941115   |
| GO:000037GO:000037RNA splic6/69 | 390/18866 | 0.003007 | 0.4051285   | 0.3941115   |
| GO:000039GO:000039mRNA spli6/69 | 390/18866 | 0.003007 | 0.4051285   | 0.3941115   |
| GO:000037GO:000037RNA splic6/69 | 393/18866 | 0.003123 | 0.4051285   | 0.3941115   |
| GO:003311GO:003311negative 2/69 | 26/18866  | 0.004048 | 0.4051285   | 0.3941115   |
| GO:000651GO:000651protein d2/69 | 29/18866  | 0.005022 | 0.4051285   | 0.3941115   |
| GO:007007GO:007007histone 12/69 | 29/18866  | 0.005022 | 0.4051285   | 0.3941115   |
| GO:001657GO:001657histone d2/69 | 30/18866  | 0.005368 | 0.4051285   | 0.3941115   |
| GO:005068GO:005068negative 2/69 | 31/18866  | 0.005724 | 0.4051285   | 0.3941115   |
| GO:000648GO:000648protein d2/69 | 32/18866  | 0.006092 | 0.4051285   | 0.3941115   |
| GO:000821GO:000821protein d2/69 | 32/18866  | 0.006092 | 0.4051285   | 0.3941115   |
| GO:00076CGO:00076Csensory p6/69 | 452/18866 | 0.006145 | 0.4051285   | 0.3941115   |
| GO:003129GO:003129replicati2/69 | 35/18866  | 0.007256 | 0.422135    | 0.4106555   |
| GO:003969GO:003969viral RNA2/69 | 35/18866  | 0.007256 | 0.422135    | 0.4106555   |
| GO:000838GO:000838RNA splic6/69 | 487/18866 | 0.008725 | 0.4595751   | 0.4470775   |
| GO:00450CGO:00450CDNA-depen2/69 | 44/18866  | 0.011295 | 0.4595751   | 0.4470775   |
| GO:200122GO:200122regulatic2/69 | 45/18866  | 0.011793 | 0.4595751   | 0.4470775   |
| GO:003018GO:003018B cell di3/69 | 137/18866 | 0.013849 | 0.4595751   | 0.4470775   |
| GO:001593GO:001593nucleobas4/69 | 261/18866 | 0.015336 | 0.4595751   | 0.4470775   |
| GO:000637GO:000637mRNA spli2/69 | 54/18866  | 0.016691 | 0.4595751   | 0.4470775   |
| GO:000293GO:000293response 2/69 | 55/18866  | 0.01728  | 0.4595751   | 0.4470775   |
| GO:005102GO:005102mRNA tran3/69 | 152/18866 | 0.018237 | 0.4595751   | 0.4470775   |
| GO:004529GO:004529mRNA cis 2/69 | 57/18866  | 0.018485 | 0.4595751   | 0.4470775   |
| GO:005091GO:005091detection5/69 | 427/18866 | 0.019971 | 0.4595751   | 0.4470775   |
| GO:000958GO:000958detection2/69 | 64/18866  | 0.022971 | 0.4595751   | 0.4470775   |
| GO:00181CGO:00181Cpeptidyl-4/69 | 310/18866 | 0.026843 | 0.4595751   | 0.4470775   |
| GO:007098GO:007098demethyla2/69 | 72/18866  | 0.028587 | 0.4595751   | 0.4470775   |

|                                 |           |          |           |           |
|---------------------------------|-----------|----------|-----------|-----------|
| GO:00509CGO:005090detection5/69 | 472/18866 | 0.029164 | 0.4595751 | 0.4470775 |
| GO:190303GO:190303regulatic3/69 | 183/18866 | 0.029492 | 0.4595751 | 0.4470775 |
| GO:000038GO:000038regulatic2/69 | 76/18866  | 0.03158  | 0.4595751 | 0.4470775 |
| GO:000958GO:000958detection2/69 | 76/18866  | 0.03158  | 0.4595751 | 0.4470775 |
| GO:003043GO:003043ubiquitin2/69 | 78/18866  | 0.033121 | 0.4595751 | 0.4470775 |
| GO:00182CGO:001820peptidyl-4/69 | 333/18866 | 0.033645 | 0.4595751 | 0.4470775 |
| GO:001908GO:001908viral_gen3/69 | 195/18866 | 0.034639 | 0.4595751 | 0.4470775 |
| GO:000232GO:000232immature_1/69 | 10/18866  | 0.035986 | 0.4595751 | 0.4470775 |
| GO:002185GO:002185pyramidal1/69 | 10/18866  | 0.035986 | 0.4595751 | 0.4470775 |
| GO:004571GO:004571low-densil/69 | 10/18866  | 0.035986 | 0.4595751 | 0.4470775 |
| GO:005191GO:005191negative_1/69 | 10/18866  | 0.035986 | 0.4595751 | 0.4470775 |
| GO:00605CGO:006050epithelial/69 | 10/18866  | 0.035986 | 0.4595751 | 0.4470775 |
| GO:009705GO:009705type B pal/69 | 10/18866  | 0.035986 | 0.4595751 | 0.4470775 |
| GO:190241GO:190241regulatic1/69 | 10/18866  | 0.035986 | 0.4595751 | 0.4470775 |
| GO:200064GO:200064regulatic1/69 | 10/18866  | 0.035986 | 0.4595751 | 0.4470775 |
| GO:005065GO:005065nucleic_a3/69 | 200/18866 | 0.036913 | 0.4595751 | 0.4470775 |
| GO:005065GO:005065RNA_trans3/69 | 200/18866 | 0.036913 | 0.4595751 | 0.4470775 |
| GO:005123GO:005123establish3/69 | 203/18866 | 0.038314 | 0.4595751 | 0.4470775 |
| GO:000024GO:000024spliceosc2/69 | 85/18866  | 0.03874  | 0.4595751 | 0.4470775 |
| GO:007238GO:007238organelle2/69 | 85/18866  | 0.03874  | 0.4595751 | 0.4470775 |
| GO:00329CGO:003290regulatic1/69 | 11/18866  | 0.039514 | 0.4595751 | 0.4470775 |
| GO:00466CGO:004660positive_1/69 | 11/18866  | 0.039514 | 0.4595751 | 0.4470775 |
| GO:005269GO:005269xenobiotil/69 | 11/18866  | 0.039514 | 0.4595751 | 0.4470775 |
| GO:19000CGO:190000regulatic1/69 | 11/18866  | 0.039514 | 0.4595751 | 0.4470775 |
| GO:190257GO:190257regulatic1/69 | 11/18866  | 0.039514 | 0.4595751 | 0.4470775 |
| GO:000719GO:000719adenylate2/69 | 86/18866  | 0.03957  | 0.4595751 | 0.4470775 |
| GO:000038GO:000038alternati2/69 | 87/18866  | 0.040408 | 0.4595751 | 0.4470775 |
| GO:190331GO:190331negative_2/69 | 88/18866  | 0.041252 | 0.4595751 | 0.4470775 |
| GO:004339GO:004339regulatic3/69 | 211/18866 | 0.04218  | 0.4595751 | 0.4470775 |
| GO:000606GO:000606ethanol_c1/69 | 12/18866  | 0.043029 | 0.4595751 | 0.4470775 |
| GO:000646GO:000646signal_pe1/69 | 12/18866  | 0.043029 | 0.4595751 | 0.4470775 |
| GO:000655GO:000655lysine_ca1/69 | 12/18866  | 0.043029 | 0.4595751 | 0.4470775 |
| GO:001618GO:001618synaptic_1/69 | 12/18866  | 0.043029 | 0.4595751 | 0.4470775 |
| GO:00329CGO:003290transform1/69 | 12/18866  | 0.043029 | 0.4595751 | 0.4470775 |
| GO:190521GO:190521regulatic1/69 | 12/18866  | 0.043029 | 0.4595751 | 0.4470775 |
| GO:005109GO:005109regulatic4/69 | 367/18866 | 0.045396 | 0.4595751 | 0.4470775 |
| GO:190303GO:190303negative_2/69 | 93/18866  | 0.04557  | 0.4595751 | 0.4470775 |
| GO:000701GO:000701microtubu4/69 | 368/18866 | 0.045772 | 0.4595751 | 0.4470775 |
| GO:000655GO:000655lysine_me1/69 | 13/18866  | 0.046531 | 0.4595751 | 0.4470775 |
| GO:00067CGO:000670estrogen_1/69 | 13/18866  | 0.046531 | 0.4595751 | 0.4470775 |
| GO:00380CGO:003800netrin-ac1/69 | 13/18866  | 0.046531 | 0.4595751 | 0.4470775 |
| GO:004244GO:004244hormone_n3/69 | 221/18866 | 0.047278 | 0.4595751 | 0.4470775 |
| GO:003031GO:003031flagellat2/69 | 96/18866  | 0.048238 | 0.4595751 | 0.4470775 |
| GO:009772GO:009772sperm_mot2/69 | 96/18866  | 0.048238 | 0.4595751 | 0.4470775 |
| GO:00421CGO:004210B_cell_pr2/69 | 97/18866  | 0.04914  | 0.4595751 | 0.4470775 |
| GO:00071CGO:000710mitotic_c1/69 | 14/18866  | 0.05002  | 0.4595751 | 0.4470775 |
| GO:00328CGO:003280low-densil/69 | 14/18866  | 0.05002  | 0.4595751 | 0.4470775 |
| GO:003293GO:003293SREBP_sig1/69 | 14/18866  | 0.05002  | 0.4595751 | 0.4470775 |
| GO:003575GO:003575regulatic1/69 | 14/18866  | 0.05002  | 0.4595751 | 0.4470775 |
| GO:003609GO:003609phosphat1/69  | 14/18866  | 0.05002  | 0.4595751 | 0.4470775 |
| GO:003816GO:003816angiotens1/69 | 14/18866  | 0.05002  | 0.4595751 | 0.4470775 |

|                                 |           |          |           |           |
|---------------------------------|-----------|----------|-----------|-----------|
| GO:00456CGO:004560negative 1/69 | 14/18866  | 0.05002  | 0.4595751 | 0.4470775 |
| GO:005164GO:005164Golgi loc1/69 | 14/18866  | 0.05002  | 0.4595751 | 0.4470775 |
| GO:005191GO:005191regulatic1/69 | 14/18866  | 0.05002  | 0.4595751 | 0.4470775 |
| GO:190415GO:190415regulatic1/69 | 14/18866  | 0.05002  | 0.4595751 | 0.4470775 |
| GO:003021GO:003021megakaryc2/69 | 100/18866 | 0.051882 | 0.4595751 | 0.4470775 |
| GO:00365CGO:003650ERAD path2/69 | 100/18866 | 0.051882 | 0.4595751 | 0.4470775 |
| GO:003112GO:003112mRNA 3'-e2/69 | 101/18866 | 0.052808 | 0.4595751 | 0.4470775 |
| GO:000721GO:000721G protein1/69 | 15/18866  | 0.053497 | 0.4595751 | 0.4470775 |
| GO:00094CGO:000940toxin met1/69 | 15/18866  | 0.053497 | 0.4595751 | 0.4470775 |
| GO:003023GO:003023male sex 1/69 | 15/18866  | 0.053497 | 0.4595751 | 0.4470775 |
| GO:003315GO:003315V(D)J rec1/69 | 15/18866  | 0.053497 | 0.4595751 | 0.4470775 |
| GO:005104GO:005104positive 1/69 | 15/18866  | 0.053497 | 0.4595751 | 0.4470775 |
| GO:005129GO:005129centrosom1/69 | 15/18866  | 0.053497 | 0.4595751 | 0.4470775 |
| GO:00715CGO:007150cellular 1/69 | 15/18866  | 0.053497 | 0.4595751 | 0.4470775 |
| GO:009059GO:009059inflamm1/69   | 15/18866  | 0.053497 | 0.4595751 | 0.4470775 |
| GO:200125GO:200125regulatic1/69 | 15/18866  | 0.053497 | 0.4595751 | 0.4470775 |
| GO:00064CGO:000640RNA local3/69 | 236/18866 | 0.055469 | 0.4595751 | 0.4470775 |
| GO:004677GO:004677protein a3/69 | 237/18866 | 0.056038 | 0.4595751 | 0.4470775 |
| GO:000981GO:000981flavonoid1/69 | 16/18866  | 0.056962 | 0.4595751 | 0.4470775 |
| GO:007086GO:007086positive 1/69 | 16/18866  | 0.056962 | 0.4595751 | 0.4470775 |
| GO:007088GO:007088positive 1/69 | 16/18866  | 0.056962 | 0.4595751 | 0.4470775 |
| GO:010605GO:010605positive 1/69 | 16/18866  | 0.056962 | 0.4595751 | 0.4470775 |
| GO:190429GO:190429positive 1/69 | 16/18866  | 0.056962 | 0.4595751 | 0.4470775 |
| GO:001095GO:001095regulatic4/69 | 396/18866 | 0.057024 | 0.4595751 | 0.4470775 |
| GO:004692GO:004692regulatic2/69 | 106/18866 | 0.057526 | 0.4595751 | 0.4470775 |
| GO:003288GO:003288regulatic3/69 | 240/18866 | 0.057761 | 0.4595751 | 0.4470775 |
| GO:000697GO:000697DNA damag1/69 | 17/18866  | 0.060414 | 0.4595751 | 0.4470775 |
| GO:000699GO:000699response 1/69 | 17/18866  | 0.060414 | 0.4595751 | 0.4470775 |
| GO:000763GO:000763chemosens1/69 | 17/18866  | 0.060414 | 0.4595751 | 0.4470775 |
| GO:190131GO:190131regulatic1/69 | 17/18866  | 0.060414 | 0.4595751 | 0.4470775 |
| GO:190381GO:190381positive 1/69 | 17/18866  | 0.060414 | 0.4595751 | 0.4470775 |
| GO:190435GO:190435positive 1/69 | 17/18866  | 0.060414 | 0.4595751 | 0.4470775 |
| GO:003313GO:003313positive 2/69 | 109/18866 | 0.060426 | 0.4595751 | 0.4470775 |
| GO:006029GO:006029cilium mc2/69 | 111/18866 | 0.062386 | 0.4595751 | 0.4470775 |
| GO:000071GO:000071resolutic1/69 | 18/18866  | 0.063853 | 0.4595751 | 0.4470775 |
| GO:004277GO:004277DNA damag1/69 | 18/18866  | 0.063853 | 0.4595751 | 0.4470775 |
| GO:004565GO:004565negative 1/69 | 18/18866  | 0.063853 | 0.4595751 | 0.4470775 |
| GO:005269GO:005269cellular 1/69 | 18/18866  | 0.063853 | 0.4595751 | 0.4470775 |
| GO:009003GO:009003regulatic1/69 | 18/18866  | 0.063853 | 0.4595751 | 0.4470775 |
| GO:00064CGO:000640mRNA expc2/69 | 113/18866 | 0.064368 | 0.4595751 | 0.4470775 |
| GO:004802GO:004802regulatic2/69 | 113/18866 | 0.064368 | 0.4595751 | 0.4470775 |
| GO:007142GO:007142mRNA-cont2/69 | 113/18866 | 0.064368 | 0.4595751 | 0.4470775 |
| GO:005192GO:005192regulatic3/69 | 253/18866 | 0.065517 | 0.4595751 | 0.4470775 |
| GO:001066GO:001066positive 1/69 | 19/18866  | 0.067281 | 0.4595751 | 0.4470775 |
| GO:001066GO:001066positive 1/69 | 19/18866  | 0.067281 | 0.4595751 | 0.4470775 |
| GO:004568GO:004568negative 1/69 | 19/18866  | 0.067281 | 0.4595751 | 0.4470775 |
| GO:004849GO:004849anterogral/69 | 19/18866  | 0.067281 | 0.4595751 | 0.4470775 |
| GO:00509CGO:005090detection1/69 | 19/18866  | 0.067281 | 0.4595751 | 0.4470775 |
| GO:005096GO:005096detection1/69 | 19/18866  | 0.067281 | 0.4595751 | 0.4470775 |
| GO:009951GO:009951synaptic 1/69 | 19/18866  | 0.067281 | 0.4595751 | 0.4470775 |
| GO:009951GO:009951synaptic 1/69 | 19/18866  | 0.067281 | 0.4595751 | 0.4470775 |



|                                  |           |          |           |           |
|----------------------------------|-----------|----------|-----------|-----------|
| GO:00068CGO:000680xenobioti2/69  | 118/18866 | 0.069414 | 0.4595751 | 0.4470775 |
| GO:000681GO:000681calcium i4/69  | 426/18866 | 0.07059  | 0.4595751 | 0.4470775 |
| GO:000809GO:000809retrograd1/69  | 20/18866  | 0.070695 | 0.4595751 | 0.4470775 |
| GO:003314GO:003314positive 1/69  | 20/18866  | 0.070695 | 0.4595751 | 0.4470775 |
| GO:007163GO:007163positive 1/69  | 20/18866  | 0.070695 | 0.4595751 | 0.4470775 |
| GO:005158GO:005158regulatic2/69  | 120/18866 | 0.071468 | 0.4595751 | 0.4470775 |
| GO:000718GO:000718G protein3/69  | 263/18866 | 0.071793 | 0.4595751 | 0.4470775 |
| GO:000153GO:000153cilium or2/69  | 122/18866 | 0.073542 | 0.4595751 | 0.4470775 |
| GO:005192GO:005192positive 2/69  | 122/18866 | 0.073542 | 0.4595751 | 0.4470775 |
| GO:006028GO:006028cilium-de2/69  | 122/18866 | 0.073542 | 0.4595751 | 0.4470775 |
| GO:000211GO:000211store-ope1/69  | 21/18866  | 0.074098 | 0.4595751 | 0.4470775 |
| GO:003022GO:003022platelet 1/69  | 21/18866  | 0.074098 | 0.4595751 | 0.4470775 |
| GO:003363GO:003363positive 1/69  | 21/18866  | 0.074098 | 0.4595751 | 0.4470775 |
| GO:006104GO:006104vascular 1/69  | 21/18866  | 0.074098 | 0.4595751 | 0.4470775 |
| GO:009028GO:009028positive 1/69  | 21/18866  | 0.074098 | 0.4595751 | 0.4470775 |
| GO:007146GO:007146cellular 2/69  | 123/18866 | 0.074586 | 0.4595751 | 0.4470775 |
| GO:003096GO:003096endoplasm2/69  | 125/18866 | 0.076689 | 0.4595751 | 0.4470775 |
| GO:000606GO:000606ethanol m1/69  | 22/18866  | 0.077488 | 0.4595751 | 0.4470775 |
| GO:003634GO:003634platelet 1/69  | 22/18866  | 0.077488 | 0.4595751 | 0.4470775 |
| GO:007137GO:007137cellular 1/69  | 22/18866  | 0.077488 | 0.4595751 | 0.4470775 |
| GO:000626GO:000626DNA repli3/69  | 273/18866 | 0.07833  | 0.4595751 | 0.4470775 |
| GO:001907GO:001907viral gen2/69  | 127/18866 | 0.078811 | 0.4595751 | 0.4470775 |
| GO:000606GO:000606uronic ac1/69  | 23/18866  | 0.080866 | 0.4595751 | 0.4470775 |
| GO:000703GO:000703vacuolar 1/69  | 23/18866  | 0.080866 | 0.4595751 | 0.4470775 |
| GO:000906GO:000906aspartate1/69  | 23/18866  | 0.080866 | 0.4595751 | 0.4470775 |
| GO:001958GO:001958glucuronal/69  | 23/18866  | 0.080866 | 0.4595751 | 0.4470775 |
| GO:003162GO:003162synaptic 1/69  | 23/18866  | 0.080866 | 0.4595751 | 0.4470775 |
| GO:00327CGO:003270negative 1/69  | 23/18866  | 0.080866 | 0.4595751 | 0.4470775 |
| GO:003279GO:003279low-densil/69  | 23/18866  | 0.080866 | 0.4595751 | 0.4470775 |
| GO:003313GO:003313regulatic1/69  | 23/18866  | 0.080866 | 0.4595751 | 0.4470775 |
| GO:005104GO:005104regulatic1/69  | 23/18866  | 0.080866 | 0.4595751 | 0.4470775 |
| GO:000931GO:000931response 4/69  | 447/18866 | 0.080993 | 0.4595751 | 0.4470775 |
| GO:000941GO:000941response 2/69  | 130/18866 | 0.082028 | 0.4595751 | 0.4470775 |
| GO:007142GO:007142ribonucle2/69  | 130/18866 | 0.082028 | 0.4595751 | 0.4470775 |
| GO:007116GO:007116ribonucle2/69  | 131/18866 | 0.083109 | 0.4595751 | 0.4470775 |
| GO:000309GO:000309glomerula1/69  | 24/18866  | 0.084231 | 0.4595751 | 0.4470775 |
| GO:001086GO:001086regulatic1/69  | 24/18866  | 0.084231 | 0.4595751 | 0.4470775 |
| GO:003462GO:003462cellular 1/69  | 24/18866  | 0.084231 | 0.4595751 | 0.4470775 |
| GO:00510CGO:005100regulatic1/69  | 24/18866  | 0.084231 | 0.4595751 | 0.4470775 |
| GO:006029GO:006029regulatic1/69  | 24/18866  | 0.084231 | 0.4595751 | 0.4470775 |
| GO:00995CGO:009950vesicle f1/69  | 24/18866  | 0.084231 | 0.4595751 | 0.4470775 |
| GO:190201GO:190201regulatic1/69  | 24/18866  | 0.084231 | 0.4595751 | 0.4470775 |
| GO:004327GO:004327positive 3/69  | 284/18866 | 0.085814 | 0.4595751 | 0.4470775 |
| GO:003475GO:003475cellular 2/69  | 134/18866 | 0.086379 | 0.4595751 | 0.4470775 |
| GO:000072GO:000072DNA doubl1/69  | 25/18866  | 0.087585 | 0.4595751 | 0.4470775 |
| GO:000753GO:000753sex deter1/69  | 25/18866  | 0.087585 | 0.4595751 | 0.4470775 |
| GO:00513CGO:005130meiotic c1/69  | 25/18866  | 0.087585 | 0.4595751 | 0.4470775 |
| GO:00972CGO:009720renal fill1/69 | 25/18866  | 0.087585 | 0.4595751 | 0.4470775 |
| GO:190438GO:190438cellular 1/69  | 25/18866  | 0.087585 | 0.4595751 | 0.4470775 |
| GO:00217CGO:002170developme3/69  | 287/18866 | 0.087906 | 0.4595751 | 0.4470775 |
| GO:00315CGO:003150protein-c3/69  | 291/18866 | 0.09073  | 0.4595751 | 0.4470775 |

|                                  |           |          |           |           |
|----------------------------------|-----------|----------|-----------|-----------|
| GO:004273GO:004273fibrinoly1/69  | 26/18866  | 0.090926 | 0.4595751 | 0.4470775 |
| GO:006007GO:006007synapse n1/69  | 26/18866  | 0.090926 | 0.4595751 | 0.4470775 |
| GO:006076GO:006076regulatic1/69  | 26/18866  | 0.090926 | 0.4595751 | 0.4470775 |
| GO:190101GO:190101positive 1/69  | 26/18866  | 0.090926 | 0.4595751 | 0.4470775 |
| GO:190435GO:190435regulatic1/69  | 26/18866  | 0.090926 | 0.4595751 | 0.4470775 |
| GO:007083GO:007083divalent 4/69  | 471/18866 | 0.093767 | 0.4595751 | 0.4470775 |
| GO:000958GO:000958detection2/69  | 141/18866 | 0.094158 | 0.4595751 | 0.4470775 |
| GO:000651GO:000651glycoprot1/69  | 27/18866  | 0.094256 | 0.4595751 | 0.4470775 |
| GO:000702GO:000702negative 1/69  | 27/18866  | 0.094256 | 0.4595751 | 0.4470775 |
| GO:00224CGO:00224Cregulatic1/69  | 27/18866  | 0.094256 | 0.4595751 | 0.4470775 |
| GO:003243GO:003243melanosom1/69  | 27/18866  | 0.094256 | 0.4595751 | 0.4470775 |
| GO:003278GO:003278positive 1/69  | 27/18866  | 0.094256 | 0.4595751 | 0.4470775 |
| GO:00425CGO:00425Cserine ph1/69  | 27/18866  | 0.094256 | 0.4595751 | 0.4470775 |
| GO:00070CGO:00070Cmitochond2/69  | 142/18866 | 0.095285 | 0.4595751 | 0.4470775 |
| GO:000631GO:000631DNA recon3/69  | 299/18866 | 0.09649  | 0.4595751 | 0.4470775 |
| GO:00064CGO:00064CRNA expor2/69  | 144/18866 | 0.097552 | 0.4595751 | 0.4470775 |
| GO:000958GO:000958detection2/69  | 144/18866 | 0.097552 | 0.4595751 | 0.4470775 |
| GO:000039GO:000039mRNA 5' -s1/69 | 28/18866  | 0.097573 | 0.4595751 | 0.4470775 |
| GO:000236GO:000236T cell li1/69  | 28/18866  | 0.097573 | 0.4595751 | 0.4470775 |
| GO:001586GO:001586ATP trans1/69  | 28/18866  | 0.097573 | 0.4595751 | 0.4470775 |
| GO:002168GO:002168cerebella1/69  | 28/18866  | 0.097573 | 0.4595751 | 0.4470775 |
| GO:003019GO:003019positive 1/69  | 28/18866  | 0.097573 | 0.4595751 | 0.4470775 |
| GO:00328CGO:00328Creceptor 1/69  | 28/18866  | 0.097573 | 0.4595751 | 0.4470775 |
| GO:004875GO:004875pigment g1/69  | 28/18866  | 0.097573 | 0.4595751 | 0.4470775 |
| GO:190004GO:190004positive 1/69  | 28/18866  | 0.097573 | 0.4595751 | 0.4470775 |
| GO:199077GO:199077response 1/69  | 28/18866  | 0.097573 | 0.4595751 | 0.4470775 |
| GO:007251GO:007251divalent 4/69  | 478/18866 | 0.097665 | 0.4595751 | 0.4470775 |
| GO:003313GO:003313regulatic2/69  | 145/18866 | 0.098691 | 0.4595751 | 0.4470775 |
| GO:003462GO:003462cellular 2/69  | 146/18866 | 0.099834 | 0.4595751 | 0.4470775 |
| GO:003097GO:003097retrograd1/69  | 29/18866  | 0.100879 | 0.4595751 | 0.4470775 |
| GO:004824GO:004824sperm cap1/69  | 29/18866  | 0.100879 | 0.4595751 | 0.4470775 |
| GO:005082GO:005082positive 1/69  | 29/18866  | 0.100879 | 0.4595751 | 0.4470775 |
| GO:007086GO:007086regulatic1/69  | 29/18866  | 0.100879 | 0.4595751 | 0.4470775 |
| GO:190351GO:190351endoplasn1/69  | 29/18866  | 0.100879 | 0.4595751 | 0.4470775 |
| GO:000827GO:000827regulatic2/69  | 148/18866 | 0.102131 | 0.4595751 | 0.4470775 |
| GO:001605GO:001605rhodopsin1/69  | 30/18866  | 0.104172 | 0.4595751 | 0.4470775 |
| GO:001827GO:001827protein N1/69  | 30/18866  | 0.104172 | 0.4595751 | 0.4470775 |
| GO:006005GO:006005angiogene1/69  | 30/18866  | 0.104172 | 0.4595751 | 0.4470775 |
| GO:009031GO:009031positive 1/69  | 30/18866  | 0.104172 | 0.4595751 | 0.4470775 |
| GO:190483GO:190483beta-cate1/69  | 30/18866  | 0.104172 | 0.4595751 | 0.4470775 |
| GO:006004GO:006004retina de2/69  | 150/18866 | 0.104443 | 0.4595751 | 0.4470775 |
| GO:000626GO:000626DNA-depen2/69  | 151/18866 | 0.105605 | 0.4595751 | 0.4470775 |
| GO:006104GO:006104regulatic2/69  | 151/18866 | 0.105605 | 0.4595751 | 0.4470775 |
| GO:005068GO:005068regulatic2/69  | 152/18866 | 0.106769 | 0.4595751 | 0.4470775 |
| GO:000232GO:000232natural k1/69  | 31/18866  | 0.107454 | 0.4595751 | 0.4470775 |
| GO:001819GO:001819peptidyl-1/69  | 31/18866  | 0.107454 | 0.4595751 | 0.4470775 |
| GO:003111GO:003111regulatic1/69  | 31/18866  | 0.107454 | 0.4595751 | 0.4470775 |
| GO:190429GO:190429regulatic1/69  | 31/18866  | 0.107454 | 0.4595751 | 0.4470775 |
| GO:003112GO:003112RNA 3' -en2/69 | 153/18866 | 0.107938 | 0.4595751 | 0.4470775 |
| GO:001097GO:001097negative 2/69  | 154/18866 | 0.10911  | 0.4595751 | 0.4470775 |
| GO:000821GO:000821estrogen 1/69  | 32/18866  | 0.110724 | 0.4595751 | 0.4470775 |

|                                 |           |          |           |           |
|---------------------------------|-----------|----------|-----------|-----------|
| GO:003469GO:003469response 1/69 | 32/18866  | 0.110724 | 0.4595751 | 0.4470775 |
| GO:005150GO:005150adenine n1/69 | 32/18866  | 0.110724 | 0.4595751 | 0.4470775 |
| GO:007052GO:007052protein k1/69 | 32/18866  | 0.110724 | 0.4595751 | 0.4470775 |
| GO:000334GO:000334cilium mc2/69 | 156/18866 | 0.111464 | 0.4595751 | 0.4470775 |
| GO:004348GO:004348regulatic2/69 | 156/18866 | 0.111464 | 0.4595751 | 0.4470775 |
| GO:000941GO:000941response 3/69 | 319/18866 | 0.111525 | 0.4595751 | 0.4470775 |
| GO:000335GO:000335regulatic1/69 | 33/18866  | 0.113981 | 0.4616013 | 0.4490486 |
| GO:001586GO:001586purine ril/69 | 33/18866  | 0.113981 | 0.4616013 | 0.4490486 |
| GO:004257GO:004257retinoic 1/69 | 33/18866  | 0.113981 | 0.4616013 | 0.4490486 |
| GO:005109GO:005109positive 2/69 | 159/18866 | 0.11502  | 0.4616013 | 0.4490486 |
| GO:000728GO:000728spermatid2/69 | 160/18866 | 0.116212 | 0.4616013 | 0.4490486 |
| GO:000689GO:000689intra-Gol1/69 | 34/18866  | 0.117228 | 0.4616013 | 0.4490486 |
| GO:001586GO:001586purine nul/69 | 34/18866  | 0.117228 | 0.4616013 | 0.4490486 |
| GO:003043GO:003043sleep 1/69    | 34/18866  | 0.117228 | 0.4616013 | 0.4490486 |
| GO:003221GO:003221positive 1/69 | 34/18866  | 0.117228 | 0.4616013 | 0.4490486 |
| GO:009866GO:009866G protein1/69 | 34/18866  | 0.117228 | 0.4616013 | 0.4490486 |
| GO:001097GO:001097transport2/69 | 161/18866 | 0.117407 | 0.4616013 | 0.4490486 |
| GO:004211GO:004211B cell ac3/69 | 328/18866 | 0.11857  | 0.4616013 | 0.4490486 |
| GO:000760GO:000760phototran1/69 | 35/18866  | 0.120462 | 0.4616013 | 0.4490486 |
| GO:001648GO:001648peptide h1/69 | 35/18866  | 0.120462 | 0.4616013 | 0.4490486 |
| GO:003280GO:003280receptor 1/69 | 35/18866  | 0.120462 | 0.4616013 | 0.4490486 |
| GO:004246GO:004246eye photc1/69 | 35/18866  | 0.120462 | 0.4616013 | 0.4490486 |
| GO:007088GO:007088regulatic1/69 | 35/18866  | 0.120462 | 0.4616013 | 0.4490486 |
| GO:014044GO:014044signaling1/69 | 35/18866  | 0.120462 | 0.4616013 | 0.4490486 |
| GO:000176GO:000176neuron mi2/69 | 164/18866 | 0.121011 | 0.4616013 | 0.4490486 |
| GO:003596GO:003596cellular 2/69 | 166/18866 | 0.123429 | 0.4616013 | 0.4490486 |
| GO:004851GO:004851spermatid2/69 | 166/18866 | 0.123429 | 0.4616013 | 0.4490486 |
| GO:005197GO:005197positive 1/69 | 36/18866  | 0.123685 | 0.4616013 | 0.4490486 |
| GO:007163GO:007163regulatic1/69 | 36/18866  | 0.123685 | 0.4616013 | 0.4490486 |
| GO:009031GO:009031regulatic1/69 | 36/18866  | 0.123685 | 0.4616013 | 0.4490486 |
| GO:010605GO:010605regulatic1/69 | 36/18866  | 0.123685 | 0.4616013 | 0.4490486 |
| GO:006042GO:006042lung epit1/69 | 37/18866  | 0.126896 | 0.462822  | 0.4502361 |
| GO:009005GO:009005positive 1/69 | 37/18866  | 0.126896 | 0.462822  | 0.4502361 |
| GO:190435GO:190435positive 1/69 | 37/18866  | 0.126896 | 0.462822  | 0.4502361 |
| GO:200024GO:200024regulatic2/69 | 170/18866 | 0.128301 | 0.462822  | 0.4502361 |
| GO:001905GO:001905viral lif3/69 | 341/18866 | 0.129033 | 0.462822  | 0.4502361 |
| GO:009015GO:009015establish3/69 | 342/18866 | 0.129851 | 0.462822  | 0.4502361 |
| GO:000686GO:000686nucleotid1/69 | 38/18866  | 0.130096 | 0.462822  | 0.4502361 |
| GO:000722GO:000722Wnt signal/69 | 38/18866  | 0.130096 | 0.462822  | 0.4502361 |
| GO:001066GO:001066positive 1/69 | 38/18866  | 0.130096 | 0.462822  | 0.4502361 |
| GO:007139GO:007139cellular 1/69 | 38/18866  | 0.130096 | 0.462822  | 0.4502361 |
| GO:007160GO:007160transform1/69 | 38/18866  | 0.130096 | 0.462822  | 0.4502361 |
| GO:190002GO:190002positive 1/69 | 38/18866  | 0.130096 | 0.462822  | 0.4502361 |
| GO:190589GO:190589positive 1/69 | 38/18866  | 0.130096 | 0.462822  | 0.4502361 |
| GO:005109GO:005109positive 2/69 | 174/18866 | 0.133218 | 0.4641459 | 0.451524  |
| GO:000182GO:000182blastocys1/69 | 39/18866  | 0.133284 | 0.4641459 | 0.451524  |
| GO:000721GO:000721serotonin1/69 | 39/18866  | 0.133284 | 0.4641459 | 0.451524  |
| GO:001073GO:001073protein k1/69 | 39/18866  | 0.133284 | 0.4641459 | 0.451524  |
| GO:001083GO:001083regulatic1/69 | 39/18866  | 0.133284 | 0.4641459 | 0.451524  |
| GO:003111GO:003111negative 1/69 | 39/18866  | 0.133284 | 0.4641459 | 0.451524  |
| GO:000726GO:000726neurotran2/69 | 175/18866 | 0.134454 | 0.464946  | 0.4523023 |

|                                 |           |          |           |           |
|---------------------------------|-----------|----------|-----------|-----------|
| GO:009964GO:009964signal re2/69 | 175/18866 | 0.134454 | 0.464946  | 0.4523023 |
| GO:005081GO:005081coagulati3/69 | 349/18866 | 0.135632 | 0.4653757 | 0.4527204 |
| GO:00439CGO:004390positive 1/69 | 40/18866  | 0.13646  | 0.4653757 | 0.4527204 |
| GO:009735GO:009735autophagc1/69 | 40/18866  | 0.13646  | 0.4653757 | 0.4527204 |
| GO:190138GO:190138positive 1/69 | 40/18866  | 0.13646  | 0.4653757 | 0.4527204 |
| GO:001908GO:001908viral tra2/69 | 178/18866 | 0.138177 | 0.4696128 | 0.4568422 |
| GO:190179GO:190179regulatic2/69 | 180/18866 | 0.140673 | 0.4764559 | 0.4634992 |
| GO:00065CGO:000650membrane 1/69 | 42/18866  | 0.142779 | 0.4800091 | 0.4669558 |
| GO:009027GO:009027regulatic1/69 | 42/18866  | 0.142779 | 0.4800091 | 0.4669558 |
| GO:009031GO:009031positive 2/69 | 182/18866 | 0.143178 | 0.4800091 | 0.4669558 |
| GO:000698GO:000698response 2/69 | 183/18866 | 0.144434 | 0.4810521 | 0.4679704 |
| GO:000661GO:000661protein e2/69 | 184/18866 | 0.145692 | 0.4810521 | 0.4679704 |
| GO:00063CGO:000630DNA catab1/69 | 43/18866  | 0.145921 | 0.4810521 | 0.4679704 |
| GO:003052GO:003052androgen 1/69 | 43/18866  | 0.145921 | 0.4810521 | 0.4679704 |
| GO:005085GO:005085positive 1/69 | 43/18866  | 0.145921 | 0.4810521 | 0.4679704 |
| GO:003167GO:003167cellular 1/69 | 44/18866  | 0.149052 | 0.4828692 | 0.4697381 |
| GO:003317GO:003317calcineur1/69 | 44/18866  | 0.149052 | 0.4828692 | 0.4697381 |
| GO:004848GO:004848synaptic 1/69 | 44/18866  | 0.149052 | 0.4828692 | 0.4697381 |
| GO:00905CGO:009050RNA phosp1/69 | 44/18866  | 0.149052 | 0.4828692 | 0.4697381 |
| GO:190198GO:190198positive 1/69 | 44/18866  | 0.149052 | 0.4828692 | 0.4697381 |
| GO:003134GO:003134negative 2/69 | 188/18866 | 0.15075  | 0.4828692 | 0.4697381 |
| GO:003009GO:003009lymphocyt3/69 | 368/18866 | 0.15176  | 0.4828692 | 0.4697381 |
| GO:003419GO:003419cellular 1/69 | 45/18866  | 0.152171 | 0.4828692 | 0.4697381 |
| GO:004561GO:004561regulatic1/69 | 45/18866  | 0.152171 | 0.4828692 | 0.4697381 |
| GO:00512CGO:005120protein il/69 | 45/18866  | 0.152171 | 0.4828692 | 0.4697381 |
| GO:00705CGO:007050regulatic2/69 | 190/18866 | 0.153292 | 0.4828692 | 0.4697381 |
| GO:009911GO:009911microtubu2/69 | 190/18866 | 0.153292 | 0.4828692 | 0.4697381 |
| GO:004586GO:004586positive 3/69 | 370/18866 | 0.153493 | 0.4828692 | 0.4697381 |
| GO:000175GO:000175eye photc1/69 | 46/18866  | 0.155279 | 0.4828692 | 0.4697381 |
| GO:000701GO:000701microtubul/69 | 46/18866  | 0.155279 | 0.4828692 | 0.4697381 |
| GO:00320CGO:003200negative 1/69 | 46/18866  | 0.155279 | 0.4828692 | 0.4697381 |
| GO:004333GO:004333response 1/69 | 46/18866  | 0.155279 | 0.4828692 | 0.4697381 |
| GO:000641GO:000641translati2/69 | 192/18866 | 0.155842 | 0.4828692 | 0.4697381 |
| GO:003057GO:003057collagen 1/69 | 47/18866  | 0.158376 | 0.4828692 | 0.4697381 |
| GO:004257GO:004257retinol n1/69 | 47/18866  | 0.158376 | 0.4828692 | 0.4697381 |
| GO:004326GO:004326positive 1/69 | 47/18866  | 0.158376 | 0.4828692 | 0.4697381 |
| GO:000808GO:000808anterogral/69 | 48/18866  | 0.161462 | 0.4828692 | 0.4697381 |
| GO:003278GO:003278regulatic1/69 | 48/18866  | 0.161462 | 0.4828692 | 0.4697381 |
| GO:003362GO:003362regulatic1/69 | 48/18866  | 0.161462 | 0.4828692 | 0.4697381 |
| GO:004246GO:004246photorecel/69 | 48/18866  | 0.161462 | 0.4828692 | 0.4697381 |
| GO:005197GO:005197regulatic1/69 | 48/18866  | 0.161462 | 0.4828692 | 0.4697381 |
| GO:006063GO:006063regulatic1/69 | 48/18866  | 0.161462 | 0.4828692 | 0.4697381 |
| GO:190403GO:190403negative 1/69 | 48/18866  | 0.161462 | 0.4828692 | 0.4697381 |
| GO:199092GO:199092response 1/69 | 48/18866  | 0.161462 | 0.4828692 | 0.4697381 |
| GO:000762GO:000762locomotor2/69 | 198/18866 | 0.163543 | 0.4828692 | 0.4697381 |
| GO:003252GO:003252protein e1/69 | 49/18866  | 0.164537 | 0.4828692 | 0.4697381 |
| GO:003266GO:003266regulatic1/69 | 49/18866  | 0.164537 | 0.4828692 | 0.4697381 |
| GO:004749GO:004749vesicle t1/69 | 49/18866  | 0.164537 | 0.4828692 | 0.4697381 |
| GO:009015GO:009015establish1/69 | 49/18866  | 0.164537 | 0.4828692 | 0.4697381 |
| GO:009772GO:009772calcineur1/69 | 49/18866  | 0.164537 | 0.4828692 | 0.4697381 |
| GO:012017GO:012017steroid h1/69 | 49/18866  | 0.164537 | 0.4828692 | 0.4697381 |

|                                 |           |          |           |           |
|---------------------------------|-----------|----------|-----------|-----------|
| GO:199009GO:199009cellular 1/69 | 49/18866  | 0.164537 | 0.4828692 | 0.4697381 |
| GO:000165GO:000165eye devel3/69 | 384/18866 | 0.165798 | 0.4832559 | 0.4701143 |
| GO:003070GO:003070cytoskele2/69 | 200/18866 | 0.166126 | 0.4832559 | 0.4701143 |
| GO:000906GO:000906aspartate1/69 | 50/18866  | 0.1676   | 0.4832559 | 0.4701143 |
| GO:002169GO:002169cerebella1/69 | 50/18866  | 0.1676   | 0.4832559 | 0.4701143 |
| GO:003019GO:003019negative 1/69 | 50/18866  | 0.1676   | 0.4832559 | 0.4701143 |
| GO:004361GO:004361keratinoc1/69 | 50/18866  | 0.1676   | 0.4832559 | 0.4701143 |
| GO:015006GO:015006visual sy3/69 | 388/18866 | 0.169368 | 0.4841574 | 0.4709913 |
| GO:000698GO:000698ER-nucleu1/69 | 51/18866  | 0.170653 | 0.4841574 | 0.4709913 |
| GO:003220GO:003220positive 1/69 | 51/18866  | 0.170653 | 0.4841574 | 0.4709913 |
| GO:190004GO:190004negative 1/69 | 51/18866  | 0.170653 | 0.4841574 | 0.4709913 |
| GO:003133GO:003133positive 3/69 | 390/18866 | 0.171161 | 0.4841574 | 0.4709913 |
| GO:005116GO:005116nuclear e2/69 | 204/18866 | 0.171312 | 0.4841574 | 0.4709913 |
| GO:003596GO:003596response 2/69 | 205/18866 | 0.172613 | 0.4841574 | 0.4709913 |
| GO:001088GO:001088regulatic1/69 | 52/18866  | 0.173694 | 0.4841574 | 0.4709913 |
| GO:003305GO:003305cellular 1/69 | 52/18866  | 0.173694 | 0.4841574 | 0.4709913 |
| GO:006042GO:006042lung morpl/69 | 52/18866  | 0.173694 | 0.4841574 | 0.4709913 |
| GO:199008GO:199008response 1/69 | 52/18866  | 0.173694 | 0.4841574 | 0.4709913 |
| GO:004888GO:004888sensory s3/69 | 394/18866 | 0.174764 | 0.4841574 | 0.4709913 |
| GO:000833GO:000833endosome 1/69 | 53/18866  | 0.176725 | 0.4841574 | 0.4709913 |
| GO:003221GO:003221regulatic1/69 | 53/18866  | 0.176725 | 0.4841574 | 0.4709913 |
| GO:004333GO:004333response 1/69 | 53/18866  | 0.176725 | 0.4841574 | 0.4709913 |
| GO:004816GO:004816regulatic1/69 | 53/18866  | 0.176725 | 0.4841574 | 0.4709913 |
| GO:009917GO:009917presynaps1/69 | 53/18866  | 0.176725 | 0.4841574 | 0.4709913 |
| GO:190002GO:190002regulatic1/69 | 53/18866  | 0.176725 | 0.4841574 | 0.4709913 |
| GO:000095GO:000095nuclear-t2/69 | 210/18866 | 0.179143 | 0.4870332 | 0.4737889 |
| GO:000661GO:000661protein t2/69 | 210/18866 | 0.179143 | 0.4870332 | 0.4737889 |
| GO:003085GO:003085negative 1/69 | 54/18866  | 0.179744 | 0.4870332 | 0.4737889 |
| GO:003262GO:003262interleuk1/69 | 54/18866  | 0.179744 | 0.4870332 | 0.4737889 |
| GO:000195GO:000195positive 1/69 | 55/18866  | 0.182753 | 0.4884935 | 0.4752095 |
| GO:000713GO:000713reciprocal/69 | 55/18866  | 0.182753 | 0.4884935 | 0.4752095 |
| GO:001623GO:001623telomere 1/69 | 55/18866  | 0.182753 | 0.4884935 | 0.4752095 |
| GO:005081GO:005081negative 1/69 | 55/18866  | 0.182753 | 0.4884935 | 0.4752095 |
| GO:005145GO:005145intracell1/69 | 55/18866  | 0.182753 | 0.4884935 | 0.4752095 |
| GO:001066GO:001066regulatic1/69 | 56/18866  | 0.185751 | 0.4910175 | 0.4776648 |
| GO:003582GO:003582homologou1/69 | 56/18866  | 0.185751 | 0.4910175 | 0.4776648 |
| GO:001974GO:001974secondary1/69 | 57/18866  | 0.188737 | 0.4910175 | 0.4776648 |
| GO:004584GO:004584positive 1/69 | 57/18866  | 0.188737 | 0.4910175 | 0.4776648 |
| GO:004685GO:004685phosphatil/69 | 57/18866  | 0.188737 | 0.4910175 | 0.4776648 |
| GO:004801GO:004801inositol 1/69 | 57/18866  | 0.188737 | 0.4910175 | 0.4776648 |
| GO:007093GO:007093protein K1/69 | 57/18866  | 0.188737 | 0.4910175 | 0.4776648 |
| GO:007139GO:007139cellular 1/69 | 57/18866  | 0.188737 | 0.4910175 | 0.4776648 |
| GO:009747GO:009747synaptic 1/69 | 57/18866  | 0.188737 | 0.4910175 | 0.4776648 |
| GO:000760GO:000760visual pe2/69 | 218/18866 | 0.189669 | 0.4910175 | 0.4776648 |
| GO:001066GO:001066regulatic1/69 | 58/18866  | 0.191714 | 0.4910175 | 0.4776648 |
| GO:003163GO:003163zymogen al/69 | 58/18866  | 0.191714 | 0.4910175 | 0.4776648 |
| GO:004585GO:004585pH reduct1/69 | 58/18866  | 0.191714 | 0.4910175 | 0.4776648 |
| GO:004612GO:004612purine ril/69 | 58/18866  | 0.191714 | 0.4910175 | 0.4776648 |
| GO:003166GO:003166cellular 2/69 | 221/18866 | 0.193638 | 0.4910175 | 0.4776648 |
| GO:000910GO:000910glycoprot3/69 | 415/18866 | 0.194027 | 0.4910175 | 0.4776648 |
| GO:001065GO:001065cardiac m1/69 | 59/18866  | 0.194679 | 0.4910175 | 0.4776648 |

|                                 |           |          |           |           |
|---------------------------------|-----------|----------|-----------|-----------|
| GO:001973GO:001973antibactel/69 | 59/18866  | 0.194679 | 0.4910175 | 0.4776648 |
| GO:004666GO:004666regulaticl/69 | 59/18866  | 0.194679 | 0.4910175 | 0.4776648 |
| GO:009893GO:009893axonal trl/69 | 59/18866  | 0.194679 | 0.4910175 | 0.4776648 |
| GO:003238GO:003238positive 2/69 | 222/18866 | 0.194964 | 0.4910175 | 0.4776648 |
| GO:005095GO:005095sensory p2/69 | 222/18866 | 0.194964 | 0.4910175 | 0.4776648 |
| GO:00076CGO:00076Cphototranl/69 | 60/18866  | 0.197633 | 0.4910175 | 0.4776648 |
| GO:00718CGO:00718Cprotein tl/69 | 60/18866  | 0.197633 | 0.4910175 | 0.4776648 |
| GO:200024GO:200024negative 1/69 | 60/18866  | 0.197633 | 0.4910175 | 0.4776648 |
| GO:004566GO:004566negative 2/69 | 225/18866 | 0.198949 | 0.4910175 | 0.4776648 |
| GO:004573GO:004573positive 2/69 | 225/18866 | 0.198949 | 0.4910175 | 0.4776648 |
| GO:001065GO:001065striated 1/69 | 61/18866  | 0.200577 | 0.4910175 | 0.4776648 |
| GO:003361GO:003361membrane 1/69 | 61/18866  | 0.200577 | 0.4910175 | 0.4776648 |
| GO:004227GO:004227purine nul/69 | 61/18866  | 0.200577 | 0.4910175 | 0.4776648 |
| GO:004688GO:004688negative 1/69 | 61/18866  | 0.200577 | 0.4910175 | 0.4776648 |
| GO:00903CGO:00903Cpositive 1/69 | 61/18866  | 0.200577 | 0.4910175 | 0.4776648 |
| GO:190307GO:190307positive 1/69 | 61/18866  | 0.200577 | 0.4910175 | 0.4776648 |
| GO:190435GO:190435regulaticl/69 | 61/18866  | 0.200577 | 0.4910175 | 0.4776648 |
| GO:004316GO:004316proteasom3/69 | 424/18866 | 0.202444 | 0.4943634 | 0.4809197 |
| GO:000683GO:000683neurotran2/69 | 229/18866 | 0.204277 | 0.4976108 | 0.4840788 |
| GO:003112GO:003112cytoplasm1/69 | 63/18866  | 0.206433 | 0.499175  | 0.4856005 |
| GO:004653GO:004653photorecel/69 | 63/18866  | 0.206433 | 0.499175  | 0.4856005 |
| GO:004662GO:004662positive 1/69 | 63/18866  | 0.206433 | 0.499175  | 0.4856005 |
| GO:004432GO:004432endoplasm2/73 | 24/19559  | 0.003596 | 0.3005535 | 0.2827907 |
| GO:003612GO:003612sperm fla3/73 | 115/19559 | 0.009136 | 0.3005535 | 0.2827907 |
| GO:001623GO:001623aggresome2/73 | 39/19559  | 0.009312 | 0.3005535 | 0.2827907 |
| GO:009772GO:0097729+2 motil3/73 | 120/19559 | 0.010255 | 0.3005535 | 0.2827907 |
| GO:00313CGO:00313Cintrinsic5/73 | 398/19559 | 0.016519 | 0.3005535 | 0.2827907 |
| GO:003122GO:003122intrinsic3/73 | 166/19559 | 0.024221 | 0.3005535 | 0.2827907 |
| GO:003509GO:003509histone n2/73 | 77/19559  | 0.033583 | 0.3005535 | 0.2827907 |
| GO:001623GO:001623inclusion2/73 | 78/19559  | 0.034385 | 0.3005535 | 0.2827907 |
| GO:003042GO:003042site of p3/73 | 191/19559 | 0.03464  | 0.3005535 | 0.2827907 |
| GO:000568GO:000568spliceosc3/73 | 192/19559 | 0.035098 | 0.3005535 | 0.2827907 |
| GO:003151GO:003151motile ci3/73 | 199/19559 | 0.038393 | 0.3005535 | 0.2827907 |
| GO:007101GO:007101catalytic2/73 | 87/19559  | 0.041931 | 0.3005535 | 0.2827907 |
| GO:000081GO:000081Swr1 comp1/73 | 12/19559  | 0.043892 | 0.3005535 | 0.2827907 |
| GO:000568GO:000568U2-type s2/73 | 93/19559  | 0.047274 | 0.3005535 | 0.2827907 |
| GO:000825GO:000825oligosacc1/73 | 13/19559  | 0.047462 | 0.3005535 | 0.2827907 |
| GO:003012GO:003012COPI vesil/73 | 13/19559  | 0.047462 | 0.3005535 | 0.2827907 |
| GO:004466GO:004466MLL3/4 cc1/73 | 13/19559  | 0.047462 | 0.3005535 | 0.2827907 |
| GO:00313CGO:00313Cintegral 4/73 | 367/19559 | 0.048361 | 0.3005535 | 0.2827907 |
| GO:00347CGO:00347Ccation ch3/73 | 221/19559 | 0.049734 | 0.3005535 | 0.2827907 |
| GO:009752GO:009752spliceosc2/73 | 96/19559  | 0.050035 | 0.3005535 | 0.2827907 |
| GO:000034GO:000034transcrip1/73 | 14/19559  | 0.05102  | 0.3005535 | 0.2827907 |
| GO:003108GO:003108platelet 1/73 | 14/19559  | 0.05102  | 0.3005535 | 0.2827907 |
| GO:004324GO:004324Fanconi a1/73 | 14/19559  | 0.05102  | 0.3005535 | 0.2827907 |
| GO:003108GO:003108BLOC-1 cc1/73 | 15/19559  | 0.054564 | 0.3005535 | 0.2827907 |
| GO:003053GO:003053small nuc2/73 | 102/19559 | 0.055725 | 0.3005535 | 0.2827907 |
| GO:003067GO:003067synaptic 2/73 | 104/19559 | 0.057671 | 0.3005535 | 0.2827907 |
| GO:00995CGO:00995Cexocytic 2/73 | 104/19559 | 0.057671 | 0.3005535 | 0.2827907 |
| GO:004512GO:004512pronucleu1/73 | 16/19559  | 0.058096 | 0.3005535 | 0.2827907 |
| GO:00347CGO:00347Cmethyltra2/73 | 105/19559 | 0.058652 | 0.3005535 | 0.2827907 |

|                                  |           |          |           |           |
|----------------------------------|-----------|----------|-----------|-----------|
| GO:00710CGO:00710CU2-type p1/73  | 17/19559  | 0.061614 | 0.3005535 | 0.2827907 |
| GO:007101GO:007101presplice1/73  | 17/19559  | 0.061614 | 0.3005535 | 0.2827907 |
| GO:003577GO:003577ribonucle3/73  | 243/19559 | 0.062526 | 0.3005535 | 0.2827907 |
| GO:00166CGO:001660nuclear s4/73  | 401/19559 | 0.062917 | 0.3005535 | 0.2827907 |
| GO:003066GO:003066COPI-coat1/73  | 18/19559  | 0.065119 | 0.3005535 | 0.2827907 |
| GO:003243GO:003243filopodiul/73  | 18/19559  | 0.065119 | 0.3005535 | 0.2827907 |
| GO:003013GO:003013transport4/73  | 410/19559 | 0.067119 | 0.3005535 | 0.2827907 |
| GO:012011GO:012011Sm-like p2/73  | 114/19559 | 0.067741 | 0.3005535 | 0.2827907 |
| GO:003108GO:003108BLOC compl/73  | 20/19559  | 0.072091 | 0.3005535 | 0.2827907 |
| GO:003514GO:003514exon-exon1/73  | 20/19559  | 0.072091 | 0.3005535 | 0.2827907 |
| GO:004318GO:004318P granule1/73  | 20/19559  | 0.072091 | 0.3005535 | 0.2827907 |
| GO:006029GO:006029germ plas1/73  | 20/19559  | 0.072091 | 0.3005535 | 0.2827907 |
| GO:003526GO:003526NuA4 hist1/73  | 21/19559  | 0.075558 | 0.3005535 | 0.2827907 |
| GO:004282GO:004282platelet 1/73  | 21/19559  | 0.075558 | 0.3005535 | 0.2827907 |
| GO:004318GO:004318H4/H2A hil/73  | 21/19559  | 0.075558 | 0.3005535 | 0.2827907 |
| GO:004549GO:004549pole plas1/73  | 21/19559  | 0.075558 | 0.3005535 | 0.2827907 |
| GO:000568GO:000568U5 snRNP 1/73  | 22/19559  | 0.079012 | 0.3074603 | 0.2892893 |
| GO:009738GO:009738photorecel/73  | 24/19559  | 0.085882 | 0.3202683 | 0.3013404 |
| GO:009879GO:009879outer mit1/73  | 24/19559  | 0.085882 | 0.3202683 | 0.3013404 |
| GO:009734GO:009734IN080-typ1/73  | 25/19559  | 0.089298 | 0.3262109 | 0.3069317 |
| GO:003228GO:003228AMPA glut1/73  | 26/19559  | 0.092701 | 0.3318707 | 0.3122571 |
| GO:004423GO:004423organelle1/73  | 27/19559  | 0.096092 | 0.3334731 | 0.3137648 |
| GO:003013GO:003013COPI-coat1/73  | 28/19559  | 0.09947  | 0.3334731 | 0.3137648 |
| GO:00347CGO:00347Cion chann3/73  | 299/19559 | 0.101077 | 0.3334731 | 0.3137648 |
| GO:000594GO:000594phosphatil/73  | 29/19559  | 0.102836 | 0.3334731 | 0.3137648 |
| GO:009722GO:009722sperm mid1/73  | 29/19559  | 0.102836 | 0.3334731 | 0.3137648 |
| GO:000573GO:000573small nucl1/73 | 30/19559  | 0.10619  | 0.3334731 | 0.3137648 |
| GO:00710CGO:00710CU2-type c1/73  | 30/19559  | 0.10619  | 0.3334731 | 0.3137648 |
| GO:003014GO:003014trans-Goll1/73 | 32/19559  | 0.11286  | 0.3483082 | 0.327723  |
| GO:003017GO:003017integral 2/73  | 158/19559 | 0.117718 | 0.3506064 | 0.3298855 |
| GO:190249GO:190249transmemb3/73  | 322/19559 | 0.119122 | 0.3506064 | 0.3298855 |
| GO:003028GO:003028integral 1/73  | 34/19559  | 0.11948  | 0.3506064 | 0.3298855 |
| GO:199035GO:199035transport3/73  | 330/19559 | 0.125664 | 0.3628052 | 0.3413633 |
| GO:000568GO:000568U1 snRNP 1/73  | 37/19559  | 0.12932  | 0.3674338 | 0.3457183 |
| GO:000579GO:000579Golgi-ass2/73  | 181/19559 | 0.146612 | 0.4081301 | 0.3840095 |
| GO:000589GO:000589voltage-g1/73  | 43/19559  | 0.148676 | 0.4081301 | 0.3840095 |
| GO:003042GO:003042growth cc2/73  | 184/19559 | 0.150484 | 0.4081301 | 0.3840095 |
| GO:190256GO:190256H4 histon1/73  | 46/19559  | 0.158194 | 0.4125772 | 0.3881938 |
| GO:009879GO:009879Golgi app3/73  | 368/19559 | 0.158405 | 0.4125772 | 0.3881938 |
| GO:002262GO:002262cytosolic1/73  | 47/19559  | 0.161343 | 0.4125772 | 0.3881938 |
| GO:009856GO:009856intrinsic1/73  | 47/19559  | 0.161343 | 0.4125772 | 0.3881938 |
| GO:000832GO:000832ionotropil/73  | 49/19559  | 0.167607 | 0.4225579 | 0.3975846 |
| GO:009887GO:009887neurotran1/73  | 51/19559  | 0.173824 | 0.4321467 | 0.4066067 |
| GO:000802GO:000802synaptic 2/73  | 205/19559 | 0.178118 | 0.4361668 | 0.4103892 |
| GO:003198GO:003198organelle3/73  | 392/19559 | 0.180315 | 0.4361668 | 0.4103892 |
| GO:003065GO:003065transport2/73  | 209/19559 | 0.183472 | 0.437886  | 0.4120068 |
| GO:003012GO:003012vesicle c1/73  | 56/19559  | 0.189169 | 0.4455419 | 0.4192103 |
| GO:190411GO:190411axon cytc1/73  | 57/19559  | 0.192204 | 0.4468109 | 0.4204043 |
| GO:007038GO:007038exocytic 2/73  | 223/19559 | 0.202387 | 0.462753  | 0.4354042 |
| GO:003017GO:003017integral 1/73  | 61/19559  | 0.204232 | 0.462753  | 0.4354042 |
| GO:003646GO:003646cytoplasm2/73  | 233/19559 | 0.216035 | 0.4791605 | 0.450842  |

|                                 |           |          |           |           |
|---------------------------------|-----------|----------|-----------|-----------|
| GO:003122GO:003122intrinsic1/73 | 66/19559  | 0.219019 | 0.4791605 | 0.450842  |
| GO:003470GO:003470calcium c1/73 | 67/19559  | 0.221944 | 0.4791605 | 0.450842  |
| GO:000172GO:000172stress fil/73 | 68/19559  | 0.224857 | 0.4791605 | 0.450842  |
| GO:009751GO:009751contractil/73 | 68/19559  | 0.224857 | 0.4791605 | 0.450842  |
| GO:000584GO:000584polysome 1/73 | 69/19559  | 0.227761 | 0.4796371 | 0.4512904 |
| GO:000580GO:000580trans-Gol2/73 | 245/19559 | 0.232524 | 0.4839738 | 0.4553708 |
| GO:001593GO:001593small rib1/73 | 74/19559  | 0.242116 | 0.4924866 | 0.4633805 |
| GO:007060GO:007060SWI/SNF s1/73 | 74/19559  | 0.242116 | 0.4924866 | 0.4633805 |
| GO:003243GO:003243actin fill/73 | 76/19559  | 0.247785 | 0.4983533 | 0.4689005 |
| GO:000011GO:000011histone d1/73 | 77/19559  | 0.250603 | 0.4984216 | 0.4689647 |
| GO:190494GO:190494ATPase cc1/73 | 78/19559  | 0.253411 | 0.4984679 | 0.4690083 |
| GO:004264GO:004264actomyosil/73 | 79/19559  | 0.256209 | 0.498493  | 0.469032  |
| GO:000993GO:000993calcium-d2/73 | 23/18352  | 0.003741 | 0.2383567 | 0.2288317 |
| GO:001085GO:001085calcium-d2/73 | 24/18352  | 0.00407  | 0.2383567 | 0.2288317 |
| GO:000468GO:000468calmoduli2/73 | 28/18352  | 0.005518 | 0.2383567 | 0.2288317 |
| GO:003245GO:003245histone d2/73 | 28/18352  | 0.005518 | 0.2383567 | 0.2288317 |
| GO:014045GO:014045protein d2/73 | 28/18352  | 0.005518 | 0.2383567 | 0.2288317 |
| GO:003245GO:003245demethyla2/73 | 38/18352  | 0.010002 | 0.360073  | 0.3456841 |
| GO:000202GO:000202protease 3/73 | 137/18352 | 0.017312 | 0.3805189 | 0.365313  |
| GO:000498GO:000498olfactory5/73 | 427/18352 | 0.02753  | 0.3805189 | 0.365313  |
| GO:003600GO:003600pre-mRNA 2/73 | 65/18352  | 0.027627 | 0.3805189 | 0.365313  |
| GO:000495GO:000495prostagla1/73 | 10/18352  | 0.039083 | 0.3805189 | 0.365313  |
| GO:001592GO:001592mannosyl-1/73 | 10/18352  | 0.039083 | 0.3805189 | 0.365313  |
| GO:001630GO:0016301-phospha1/73 | 10/18352  | 0.039083 | 0.3805189 | 0.365313  |
| GO:001845GO:001845alcohol d1/73 | 10/18352  | 0.039083 | 0.3805189 | 0.365313  |
| GO:000554GO:000554phosphati2/73 | 82/18352  | 0.042254 | 0.3805189 | 0.365313  |
| GO:000495GO:000495prostanoil/73 | 11/18352  | 0.042907 | 0.3805189 | 0.365313  |
| GO:001675GO:001675transfera3/73 | 201/18352 | 0.04606  | 0.3805189 | 0.365313  |
| GO:000430GO:000430estradiol1/73 | 12/18352  | 0.046716 | 0.3805189 | 0.365313  |
| GO:003500GO:003500phosphatil/73 | 12/18352  | 0.046716 | 0.3805189 | 0.365313  |
| GO:009715GO:009715pre-mRNA 1/73 | 12/18352  | 0.046716 | 0.3805189 | 0.365313  |
| GO:003445GO:003445ubiquitin1/73 | 13/18352  | 0.050511 | 0.3805189 | 0.365313  |
| GO:005121GO:005121dioxygena2/73 | 91/18352  | 0.050934 | 0.3805189 | 0.365313  |
| GO:000455GO:000455alpha-man1/73 | 15/18352  | 0.058055 | 0.3805189 | 0.365313  |
| GO:000495GO:000495icosanoid1/73 | 15/18352  | 0.058055 | 0.3805189 | 0.365313  |
| GO:009884GO:009884sequence-1/73 | 15/18352  | 0.058055 | 0.3805189 | 0.365313  |
| GO:000509GO:000509GDP-dissc1/73 | 16/18352  | 0.061805 | 0.3805189 | 0.365313  |
| GO:001592GO:001592mannosidal/73 | 16/18352  | 0.061805 | 0.3805189 | 0.365313  |
| GO:001630GO:001630phosphatil/73 | 16/18352  | 0.061805 | 0.3805189 | 0.365313  |
| GO:005274GO:005274phosphatil/73 | 16/18352  | 0.061805 | 0.3805189 | 0.365313  |
| GO:000554GO:000554odorant b2/73 | 103/18352 | 0.063397 | 0.3805189 | 0.365313  |
| GO:000513GO:000513type I in1/73 | 17/18352  | 0.06554  | 0.3805189 | 0.365313  |
| GO:000470GO:000470MAP kinas1/73 | 18/18352  | 0.069261 | 0.3805189 | 0.365313  |
| GO:000840GO:0008405'-3' exc1/73 | 19/18352  | 0.072966 | 0.3805189 | 0.365313  |
| GO:000474GO:000474retinol d1/73 | 20/18352  | 0.076658 | 0.3805189 | 0.365313  |
| GO:000832GO:000832protein t1/73 | 20/18352  | 0.076658 | 0.3805189 | 0.365313  |
| GO:014031GO:014031protein t1/73 | 20/18352  | 0.076658 | 0.3805189 | 0.365313  |
| GO:199038GO:199038ubiquitin1/73 | 20/18352  | 0.076658 | 0.3805189 | 0.365313  |
| GO:000014GO:000014SNARE bin2/73 | 115/18352 | 0.076771 | 0.3805189 | 0.365313  |
| GO:000460GO:000460glutathic1/73 | 21/18352  | 0.080335 | 0.3805189 | 0.365313  |
| GO:004349GO:004349protein-n1/73 | 21/18352  | 0.080335 | 0.3805189 | 0.365313  |



|                                 |           |          |           |           |
|---------------------------------|-----------|----------|-----------|-----------|
| GO:190293GO:190293phosphati2/73 | 119/18352 | 0.081412 | 0.3805189 | 0.365313  |
| GO:001661GO:001661oxidoredu2/73 | 120/18352 | 0.082586 | 0.3805189 | 0.365313  |
| GO:002288GO:002288macromole1/73 | 22/18352  | 0.083997 | 0.3805189 | 0.365313  |
| GO:003369GO:003369sialic ac1/73 | 22/18352  | 0.083997 | 0.3805189 | 0.365313  |
| GO:000517GO:000517hormone a2/73 | 122/18352 | 0.084949 | 0.3805189 | 0.365313  |
| GO:003509GO:003509phosphati3/73 | 262/18352 | 0.086524 | 0.3805189 | 0.365313  |
| GO:01401CGO:01401Ccatalytic1/73 | 23/18352  | 0.087645 | 0.3805189 | 0.365313  |
| GO:001661GO:001661oxidoredu2/73 | 130/18352 | 0.094602 | 0.3805189 | 0.365313  |
| GO:001675GO:001675transfera3/73 | 275/18352 | 0.096608 | 0.3805189 | 0.365313  |
| GO:004432GO:004432ion chann2/73 | 132/18352 | 0.097064 | 0.3805189 | 0.365313  |
| GO:000534GO:000534ATP trans1/73 | 26/18352  | 0.098503 | 0.3805189 | 0.365313  |
| GO:001707GO:001707syntaxin-1/73 | 26/18352  | 0.098503 | 0.3805189 | 0.365313  |
| GO:000806GO:000806glutamatel/73 | 27/18352  | 0.102094 | 0.3805189 | 0.365313  |
| GO:005178GO:005178misfolded1/73 | 27/18352  | 0.102094 | 0.3805189 | 0.365313  |
| GO:005068GO:005068androgen 1/73 | 28/18352  | 0.105671 | 0.3805189 | 0.365313  |
| GO:008002GO:008002phosphatil/73 | 28/18352  | 0.105671 | 0.3805189 | 0.365313  |
| GO:002284GO:002284voltage-g2/73 | 140/18352 | 0.107087 | 0.3805189 | 0.365313  |
| GO:004342GO:004342bHLH tran1/73 | 29/18352  | 0.109234 | 0.3805189 | 0.365313  |
| GO:000819GO:000819UDP-glycc2/73 | 144/18352 | 0.1122   | 0.3805189 | 0.365313  |
| GO:000029GO:000029adenine n1/73 | 30/18352  | 0.112783 | 0.3805189 | 0.365313  |
| GO:000518GO:000518neuropept1/73 | 30/18352  | 0.112783 | 0.3805189 | 0.365313  |
| GO:000534GO:000534purine ril/73 | 30/18352  | 0.112783 | 0.3805189 | 0.365313  |
| GO:003376GO:003376steroid d1/73 | 30/18352  | 0.112783 | 0.3805189 | 0.365313  |
| GO:004332GO:004332phosphatil/73 | 30/18352  | 0.112783 | 0.3805189 | 0.365313  |
| GO:001521GO:001521purine nu1/73 | 31/18352  | 0.116318 | 0.3805189 | 0.365313  |
| GO:003029GO:003029protein s1/73 | 31/18352  | 0.116318 | 0.3805189 | 0.365313  |
| GO:190468GO:190468peptide t1/73 | 31/18352  | 0.116318 | 0.3805189 | 0.365313  |
| GO:001502GO:001502glucuronc1/73 | 32/18352  | 0.119839 | 0.3805189 | 0.365313  |
| GO:001521GO:001521nucleotid1/73 | 33/18352  | 0.123346 | 0.3805189 | 0.365313  |
| GO:005101GO:005101mitogen-a1/73 | 33/18352  | 0.123346 | 0.3805189 | 0.365313  |
| GO:000499GO:000499G protein1/73 | 34/18352  | 0.12684  | 0.3805189 | 0.365313  |
| GO:001622GO:001622steroid d1/73 | 34/18352  | 0.12684  | 0.3805189 | 0.365313  |
| GO:009958GO:009958serotonin1/73 | 34/18352  | 0.12684  | 0.3805189 | 0.365313  |
| GO:004801GO:004801receptor 4/73 | 487/18352 | 0.128821 | 0.3811683 | 0.3659364 |
| GO:003054GO:003054signaling4/73 | 492/18352 | 0.132308 | 0.3853017 | 0.3699046 |
| GO:000017GO:0000173'-5'-exc1/73 | 36/18352  | 0.133785 | 0.3853017 | 0.3699046 |
| GO:00156CGO:00156Corganophc1/73 | 38/18352  | 0.140676 | 0.3939998 | 0.3782551 |
| GO:001689GO:001689exoribonu1/73 | 38/18352  | 0.140676 | 0.3939998 | 0.3782551 |
| GO:000531GO:000531dicarboxyl/73 | 39/18352  | 0.144102 | 0.3939998 | 0.3782551 |
| GO:000554GO:000554phosphatil/73 | 39/18352  | 0.144102 | 0.3939998 | 0.3782551 |
| GO:000453GO:000453exoribonu1/73 | 40/18352  | 0.147514 | 0.3975242 | 0.3816388 |
| GO:000853GO:000853Ran GTPas1/73 | 41/18352  | 0.150912 | 0.3975242 | 0.3816388 |
| GO:004216GO:004216SH2 domail/73 | 41/18352  | 0.150912 | 0.3975242 | 0.3816388 |
| GO:190198GO:190198phosphati2/73 | 179/18352 | 0.159287 | 0.4091986 | 0.3928466 |
| GO:014029GO:014029DNA-bindi3/73 | 347/18352 | 0.160018 | 0.4091986 | 0.3928466 |
| GO:000524GO:000524voltage-g1/73 | 44/18352  | 0.161027 | 0.4091986 | 0.3928466 |
| GO:000471GO:000471protein s1/73 | 45/18352  | 0.164372 | 0.4128425 | 0.3963449 |
| GO:003525GO:003525glutamatel/73 | 46/18352  | 0.167705 | 0.41637   | 0.3997314 |
| GO:000837GO:000837acetylga11/73 | 47/18352  | 0.171024 | 0.4197851 | 0.4030101 |
| GO:000374GO:000374translatil/73 | 51/18352  | 0.18417  | 0.4283924 | 0.4112734 |
| GO:000822GO:000822G protein1/73 | 51/18352  | 0.18417  | 0.4283924 | 0.4112734 |

|                                         |           |          |           |           |
|-----------------------------------------|-----------|----------|-----------|-----------|
| GO:004288GO:004288amide tra1/73         | 51/18352  | 0.18417  | 0.4283924 | 0.4112734 |
| GO:000524GO:000524voltage-g2/73         | 197/18352 | 0.184746 | 0.4283924 | 0.4112734 |
| GO:002283GO:002283voltage-g2/73         | 197/18352 | 0.184746 | 0.4283924 | 0.4112734 |
| GO:000460GO:000460peroxidase1/73        | 52/18352  | 0.187424 | 0.4283924 | 0.4112734 |
| GO:000551GO:000551calmodulin2/73        | 200/18352 | 0.189047 | 0.4283924 | 0.4112734 |
| GO:001545GO:001545potassium1/73         | 53/18352  | 0.190665 | 0.4283924 | 0.4112734 |
| GO:001593GO:001593nucleobase1/73        | 54/18352  | 0.193894 | 0.4283924 | 0.4112734 |
| GO:000440GO:000440histone a1/73         | 55/18352  | 0.19711  | 0.4283924 | 0.4112734 |
| GO:000508GO:000508protein k1/73         | 55/18352  | 0.19711  | 0.4283924 | 0.4112734 |
| GO:000840GO:0008403'-5' exonuclease1/73 | 56/18352  | 0.200313 | 0.4283924 | 0.4112734 |
| GO:001668GO:001668oxidoreductase1/73    | 56/18352  | 0.200313 | 0.4283924 | 0.4112734 |
| GO:006173GO:006173peptide-l1/73         | 57/18352  | 0.203504 | 0.4309493 | 0.4137281 |
| GO:001679GO:001679exonuclease1/73       | 58/18352  | 0.206682 | 0.4334302 | 0.4161099 |
| GO:190150GO:190150carbohydrate1/73      | 61/18352  | 0.216142 | 0.4489094 | 0.4309705 |
| GO:001984GO:001984rRNA binding1/73      | 64/18352  | 0.22549  | 0.4614355 | 0.4429961 |
| GO:000486GO:000486protein k1/73         | 65/18352  | 0.228581 | 0.4614355 | 0.4429961 |
| GO:003421GO:003421peptide N1/73         | 65/18352  | 0.228581 | 0.4614355 | 0.4429961 |
| GO:000203GO:000203p53 binding1/73       | 66/18352  | 0.231661 | 0.4633218 | 0.444807  |
| GO:000512GO:000512cytokine 2/73         | 235/18352 | 0.240046 | 0.4644514 | 0.4458914 |
| GO:001921GO:001921kinase in1/73         | 69/18352  | 0.240827 | 0.4644514 | 0.4458914 |
| GO:003506GO:003506methylase1/73         | 69/18352  | 0.240827 | 0.4644514 | 0.4458914 |
| GO:014003GO:014003methylase1/73         | 69/18352  | 0.240827 | 0.4644514 | 0.4458914 |
| GO:004239GO:004239histone b2/73         | 238/18352 | 0.244463 | 0.4672918 | 0.4486184 |
| GO:000467GO:000467protein s3/73         | 435/18352 | 0.249768 | 0.4732453 | 0.454334  |
| GO:003067GO:003067protein-n2/73         | 244/18352 | 0.253308 | 0.4757779 | 0.4567653 |
| GO:007049GO:007049repressin1/73         | 74/18352  | 0.255864 | 0.476436  | 0.4573972 |
| GO:000372GO:000372RNA helicase1/73      | 77/18352  | 0.264745 | 0.4887594 | 0.4692281 |
| GO:001990GO:001990syntaxin 1/73         | 78/18352  | 0.267682 | 0.4899936 | 0.4704129 |
| GO:000554GO:000554phospholipase3/73     | 454/18352 | 0.270171 | 0.4903952 | 0.4707985 |
| GO:003525GO:003525steroid hormone1/73   | 81/18352  | 0.276423 | 0.4975621 | 0.4776791 |

```

size      DB      enrichmenrep("Up", nrow(up.result$Enrich_tab))
IRF7/TNFS 4 pathway_K 0.14814815 Up
LHB/CACNA 3 pathway_K 0.11111111 Up
CACNA1S/I 3 pathway_K 0.11111111 Up
CACNA1S/C 3 pathway_K 0.11111111 Up
LHB/ADCY5 2 pathway_K 0.07407407 Up
DVL1/CACN 3 pathway_K 0.11111111 Up
IRF7/OAS1 3 pathway_K 0.11111111 Up
LHB/CACNA 2 pathway_K 0.07407407 Up
CACNA1S/A 2 pathway_K 0.07407407 Up
CACNA1S/A 2 pathway_K 0.07407407 Up
DVL1/ITGA 4 pathway_K 0.14814815 Up
CACNA1S/I 2 pathway_K 0.07407407 Up
CACNA1S/A 2 pathway_K 0.07407407 Up
LHB/CACNA 3 pathway_K 0.11111111 Up
CACNA1S/A 2 pathway_K 0.07407407 Up
CACNA1S/I 2 pathway_K 0.07407407 Up
CACNA1S/A 2 pathway_K 0.07407407 Up
DVL1/ADCY 2 pathway_K 0.07407407 Up
MYL12B/TH 2 pathway_K 0.07407407 Up
CACNA1S/A 2 pathway_K 0.07407407 Up
CACNA1S/A 2 pathway_K 0.07407407 Up
MYL12B/AC 2 pathway_K 0.07407407 Up
CACNA1S/A 2 pathway_K 0.07407407 Up
IRF7/OAS1 2 pathway_K 0.07407407 Up
ITGA8/SIG 2 pathway_K 0.07407407 Up
CACNA1S/A 2 pathway_K 0.07407407 Up
CACNA1S/A 2 pathway_K 0.07407407 Up
CACNA1S/A 2 pathway_K 0.07407407 Up
IL13      1 pathway_K 0.03703704 Up
CACNA1S/A 2 pathway_K 0.07407407 Up
IRF7/OAS1 2 pathway_K 0.07407407 Up
B4GALNT4 1 pathway_K 0.03703704 Up
CHRN2     1 pathway_K 0.03703704 Up
MYL12B/IT 2 pathway_K 0.07407407 Up
IRF7/OAS1 2 pathway_K 0.07407407 Up
ADCY5     1 pathway_K 0.03703704 Up
PYCR3     1 pathway_K 0.03703704 Up
MYL12B/IT 2 pathway_K 0.07407407 Up
MYL12B/TN 2 pathway_K 0.07407407 Up
DVL1      1 pathway_K 0.03703704 Up
ADCY5     1 pathway_K 0.03703704 Up
CMPK2     1 pathway_K 0.03703704 Up
AKR1C1    1 pathway_K 0.03703704 Up
ADCY5     1 pathway_K 0.03703704 Up
IRF7      1 pathway_K 0.03703704 Up
DVL1      1 pathway_K 0.03703704 Up
IL13      1 pathway_K 0.03703704 Up
IL13      1 pathway_K 0.03703704 Up
ADCY5     1 pathway_K 0.03703704 Up

```

|           |             |            |    |
|-----------|-------------|------------|----|
| SC02      | 1 pathway_K | 0.03703704 | Up |
| IRF7      | 1 pathway_K | 0.03703704 | Up |
| LHB       | 1 pathway_K | 0.03703704 | Up |
| ADCY5     | 1 pathway_K | 0.03703704 | Up |
| ADCY5     | 1 pathway_K | 0.03703704 | Up |
| PYCR3     | 1 pathway_K | 0.03703704 | Up |
| ADCY5     | 1 pathway_K | 0.03703704 | Up |
| AKR1C1    | 1 pathway_K | 0.03703704 | Up |
| FABP3     | 1 pathway_K | 0.03703704 | Up |
| SERPING1  | 1 pathway_K | 0.03703704 | Up |
| SERPING1  | 1 pathway_K | 0.03703704 | Up |
| CACNA1S   | 1 pathway_K | 0.03703704 | Up |
| ITGA8     | 1 pathway_K | 0.03703704 | Up |
| ADCY5     | 1 pathway_K | 0.03703704 | Up |
| ADCY5     | 1 pathway_K | 0.03703704 | Up |
| BATF2     | 1 pathway_K | 0.03703704 | Up |
| IL13/TNFS | 2 pathway_K | 0.07407407 | Up |
| ADCY5     | 1 pathway_K | 0.03703704 | Up |
| ADCY5     | 1 pathway_K | 0.03703704 | Up |
| IL13      | 1 pathway_K | 0.03703704 | Up |
| IL13      | 1 pathway_K | 0.03703704 | Up |
| ADCY5     | 1 pathway_K | 0.03703704 | Up |
| ADCY5     | 1 pathway_K | 0.03703704 | Up |
| ADCY5     | 1 pathway_K | 0.03703704 | Up |
| TNFSF10   | 1 pathway_K | 0.03703704 | Up |
| ADCY5     | 1 pathway_K | 0.03703704 | Up |
| ADCY5     | 1 pathway_K | 0.03703704 | Up |
| IRF7      | 1 pathway_K | 0.03703704 | Up |
| ADCY5     | 1 pathway_K | 0.03703704 | Up |
| LHB/CHRNE | 2 pathway_K | 0.07407407 | Up |
| ADCY5     | 1 pathway_K | 0.03703704 | Up |
| BTBD17/OA | 5 geneontol | 0.07692308 | Up |
| BTBD17/OA | 5 geneontol | 0.07692308 | Up |
| BTBD17/LA | 6 geneontol | 0.09230769 | Up |
| IRF7/OAS1 | 5 geneontol | 0.07692308 | Up |
| IRF7/OAS1 | 5 geneontol | 0.07692308 | Up |
| IRF7/OAS1 | 5 geneontol | 0.07692308 | Up |
| BTBD17/OA | 5 geneontol | 0.07692308 | Up |
| BTBD17/IR | 8 geneontol | 0.12307692 | Up |
| BTBD17/OA | 5 geneontol | 0.07692308 | Up |
| BTBD17/OA | 5 geneontol | 0.07692308 | Up |
| BTBD17/LA | 6 geneontol | 0.09230769 | Up |
| BTBD17/LA | 6 geneontol | 0.09230769 | Up |
| BTBD17/LA | 7 geneontol | 0.10769231 | Up |
| IRF7/OAS1 | 6 geneontol | 0.09230769 | Up |
| PARP14/IR | 4 geneontol | 0.06153846 | Up |
| DVL1/IGFN | 6 geneontol | 0.09230769 | Up |
| IRF7/DDX6 | 2 geneontol | 0.03076923 | Up |
| SOX1/DMRT | 2 geneontol | 0.03076923 | Up |
| SOX1/DMRT | 2 geneontol | 0.03076923 | Up |
| SOX1/DMRT | 2 geneontol | 0.03076923 | Up |

|           |   |           |            |    |
|-----------|---|-----------|------------|----|
| SOX1/DMRT | 2 | geneontol | 0.03076923 | Up |
| SOX1/DMRT | 2 | geneontol | 0.03076923 | Up |
| LHB/AKR1C | 2 | geneontol | 0.03076923 | Up |
| NME9/CMPK | 2 | geneontol | 0.03076923 | Up |
| IGFN1/TUL | 6 | geneontol | 0.09230769 | Up |
| IGFN1/TUL | 4 | geneontol | 0.06153846 | Up |
| IGFN1/TUL | 6 | geneontol | 0.09230769 | Up |
| IGFN1/TUL | 6 | geneontol | 0.09230769 | Up |
| SOX1/DMRT | 2 | geneontol | 0.03076923 | Up |
| OAS1/OASL | 2 | geneontol | 0.03076923 | Up |
| NME9/CMPK | 2 | geneontol | 0.03076923 | Up |
| SOX1/DMRT | 2 | geneontol | 0.03076923 | Up |
| PARP14/IR | 4 | geneontol | 0.06153846 | Up |
| PARP14/IR | 4 | geneontol | 0.06153846 | Up |
| DVL1/REEF | 3 | geneontol | 0.04615385 | Up |
| PARP14/IR | 4 | geneontol | 0.06153846 | Up |
| IRF7/RSAC | 3 | geneontol | 0.04615385 | Up |
| NME9/CMPK | 2 | geneontol | 0.03076923 | Up |
| IRF7/DDX6 | 2 | geneontol | 0.03076923 | Up |
| PARP14/IR | 4 | geneontol | 0.06153846 | Up |
| IGFN1/TUL | 5 | geneontol | 0.07692308 | Up |
| SOX1/DMRT | 2 | geneontol | 0.03076923 | Up |
| TULP1/THY | 2 | geneontol | 0.03076923 | Up |
| IRF7/USP1 | 2 | geneontol | 0.03076923 | Up |
| RSAD2/DDX | 2 | geneontol | 0.03076923 | Up |
| CDX4/SOX1 | 5 | geneontol | 0.07692308 | Up |
| LHB/AKR1C | 2 | geneontol | 0.03076923 | Up |
| IL13/THY1 | 2 | geneontol | 0.03076923 | Up |
| CHRN2/IL  | 2 | geneontol | 0.03076923 | Up |
| NME9/CMPK | 2 | geneontol | 0.03076923 | Up |
| IGFN1/SOX | 3 | geneontol | 0.04615385 | Up |
| PIM3/OAS1 | 4 | geneontol | 0.06153846 | Up |
| PIM3/OAS1 | 4 | geneontol | 0.06153846 | Up |
| CHRN2/IL  | 2 | geneontol | 0.03076923 | Up |
| TULP1/THY | 2 | geneontol | 0.03076923 | Up |
| NME9/CMPK | 2 | geneontol | 0.03076923 | Up |
| TULP1/THY | 2 | geneontol | 0.03076923 | Up |
| SOX1/DMRT | 2 | geneontol | 0.03076923 | Up |
| CHRN2/GF  | 2 | geneontol | 0.03076923 | Up |
| PARP14/IR | 2 | geneontol | 0.03076923 | Up |
| CHRN2/GF  | 2 | geneontol | 0.03076923 | Up |
| PARP14/IR | 5 | geneontol | 0.07692308 | Up |
| DVL1/CHRN | 2 | geneontol | 0.03076923 | Up |
| DVL1/CHRN | 2 | geneontol | 0.03076923 | Up |
| IL13/THY1 | 2 | geneontol | 0.03076923 | Up |
| IGFN1/TUL | 3 | geneontol | 0.04615385 | Up |
| DVL1/THY1 | 2 | geneontol | 0.03076923 | Up |
| PARP14/TH | 2 | geneontol | 0.03076923 | Up |
| SOX1/DMRT | 2 | geneontol | 0.03076923 | Up |
| PARP14/IR | 2 | geneontol | 0.03076923 | Up |
| PIM3/ADCY | 2 | geneontol | 0.03076923 | Up |

|           |   |           |            |    |
|-----------|---|-----------|------------|----|
| CHRN2/IL  | 4 | geneontol | 0.06153846 | Up |
| IGFN1/THY | 2 | geneontol | 0.03076923 | Up |
| DVL1/CHRN | 3 | geneontol | 0.04615385 | Up |
| NDRG1/IL1 | 2 | geneontol | 0.03076923 | Up |
| LHB/TNFSF | 3 | geneontol | 0.04615385 | Up |
| CHRN2/IL  | 2 | geneontol | 0.03076923 | Up |
| PARP14/SE | 2 | geneontol | 0.03076923 | Up |
| TULP1/THY | 2 | geneontol | 0.03076923 | Up |
| CDX4/SOX1 | 5 | geneontol | 0.07692308 | Up |
| IL13/THY1 | 5 | geneontol | 0.07692308 | Up |
| PIM3/ADCY | 2 | geneontol | 0.03076923 | Up |
| IRF7/DDX6 | 2 | geneontol | 0.03076923 | Up |
| PARP14/IR | 4 | geneontol | 0.06153846 | Up |
| CACNA1S/C | 5 | geneontol | 0.07692308 | Up |
| SOX1/DMRT | 2 | geneontol | 0.03076923 | Up |
| IL13/THY1 | 5 | geneontol | 0.07692308 | Up |
| IRF7/DDX6 | 2 | geneontol | 0.03076923 | Up |
| PARP14/IL | 2 | geneontol | 0.03076923 | Up |
| IL13/THY1 | 4 | geneontol | 0.06153846 | Up |
| IGFN1/THY | 2 | geneontol | 0.03076923 | Up |
| IL13/THY1 | 2 | geneontol | 0.03076923 | Up |
| DVL1/IGFN | 3 | geneontol | 0.04615385 | Up |
| IRF7/RSAC | 2 | geneontol | 0.03076923 | Up |
| IL13/THY1 | 5 | geneontol | 0.07692308 | Up |
| CHRN2/SC  | 3 | geneontol | 0.04615385 | Up |
| NDRG1/ETV | 2 | geneontol | 0.03076923 | Up |
| CHRN2/DM  | 3 | geneontol | 0.04615385 | Up |
| DVL1/CHRN | 2 | geneontol | 0.03076923 | Up |
| PARP14/PA | 2 | geneontol | 0.03076923 | Up |
| IL13/THY1 | 2 | geneontol | 0.03076923 | Up |
| IRF7/RSAC | 3 | geneontol | 0.04615385 | Up |
| NME9/CMPK | 2 | geneontol | 0.03076923 | Up |
| CHRN2/SC  | 2 | geneontol | 0.03076923 | Up |
| PIM3/IL13 | 4 | geneontol | 0.06153846 | Up |
| SOX1/CRYE | 2 | geneontol | 0.03076923 | Up |
| DVL1      | 1 | geneontol | 0.01538462 | Up |
| ADCY5     | 1 | geneontol | 0.01538462 | Up |
| NME9      | 1 | geneontol | 0.01538462 | Up |
| PYCR3     | 1 | geneontol | 0.01538462 | Up |
| CMPK2     | 1 | geneontol | 0.01538462 | Up |
| RHBG      | 1 | geneontol | 0.01538462 | Up |
| CHRN2     | 1 | geneontol | 0.01538462 | Up |
| AKR1C1    | 1 | geneontol | 0.01538462 | Up |
| RSAD2     | 1 | geneontol | 0.01538462 | Up |
| RSAD2     | 1 | geneontol | 0.01538462 | Up |
| IL13      | 1 | geneontol | 0.01538462 | Up |
| CACNA1S   | 1 | geneontol | 0.01538462 | Up |
| RHBG      | 1 | geneontol | 0.01538462 | Up |
| IL13      | 1 | geneontol | 0.01538462 | Up |
| IRF7      | 1 | geneontol | 0.01538462 | Up |
| IL13/THY1 | 4 | geneontol | 0.06153846 | Up |

|           |   |           |            |    |
|-----------|---|-----------|------------|----|
| NME9/CMPK | 2 | geneontol | 0.03076923 | Up |
| ETV1/IL13 | 3 | geneontol | 0.04615385 | Up |
| PARP14/IL | 2 | geneontol | 0.03076923 | Up |
| CACNA1S/C | 4 | geneontol | 0.06153846 | Up |
| PARP14/PA | 2 | geneontol | 0.03076923 | Up |
| NME9      | 1 | geneontol | 0.01538462 | Up |
| ADCY5     | 1 | geneontol | 0.01538462 | Up |
| IRF7      | 1 | geneontol | 0.01538462 | Up |
| SLC26A8   | 1 | geneontol | 0.01538462 | Up |
| IL13      | 1 | geneontol | 0.01538462 | Up |
| THY1      | 1 | geneontol | 0.01538462 | Up |
| NME9      | 1 | geneontol | 0.01538462 | Up |
| THY1      | 1 | geneontol | 0.01538462 | Up |
| IL13      | 1 | geneontol | 0.01538462 | Up |
| DVL1      | 1 | geneontol | 0.01538462 | Up |
| ADCY5     | 1 | geneontol | 0.01538462 | Up |
| ADCY5     | 1 | geneontol | 0.01538462 | Up |
| DVL1      | 1 | geneontol | 0.01538462 | Up |
| RSAD2     | 1 | geneontol | 0.01538462 | Up |
| PARP14/IL | 2 | geneontol | 0.03076923 | Up |
| PARP14/IL | 2 | geneontol | 0.03076923 | Up |
| DVL1/ALX1 | 2 | geneontol | 0.03076923 | Up |
| CHRN2/TU  | 3 | geneontol | 0.04615385 | Up |
| CDX4/HES7 | 3 | geneontol | 0.04615385 | Up |
| SOX1/DMRT | 2 | geneontol | 0.03076923 | Up |
| DVL1/ALX1 | 2 | geneontol | 0.03076923 | Up |
| SERPING1  | 1 | geneontol | 0.01538462 | Up |
| GPR157    | 1 | geneontol | 0.01538462 | Up |
| FABP3     | 1 | geneontol | 0.01538462 | Up |
| DVL1      | 1 | geneontol | 0.01538462 | Up |
| IRF7      | 1 | geneontol | 0.01538462 | Up |
| CEP97     | 1 | geneontol | 0.01538462 | Up |
| PARP14/IL | 2 | geneontol | 0.03076923 | Up |
| DVL1/CHRN | 3 | geneontol | 0.04615385 | Up |
| CHRN2/TU  | 3 | geneontol | 0.04615385 | Up |
| IL13/RSAC | 3 | geneontol | 0.04615385 | Up |
| PIM3/IL13 | 4 | geneontol | 0.06153846 | Up |
| PIM3/RSAC | 2 | geneontol | 0.03076923 | Up |
| ADCY5     | 1 | geneontol | 0.01538462 | Up |
| SERPING1  | 1 | geneontol | 0.01538462 | Up |
| CMPK2     | 1 | geneontol | 0.01538462 | Up |
| CHRN2     | 1 | geneontol | 0.01538462 | Up |
| CHRN2     | 1 | geneontol | 0.01538462 | Up |
| CHRN2     | 1 | geneontol | 0.01538462 | Up |
| ADCY5     | 1 | geneontol | 0.01538462 | Up |
| CHRN2     | 1 | geneontol | 0.01538462 | Up |
| CMPK2     | 1 | geneontol | 0.01538462 | Up |
| ETV1      | 1 | geneontol | 0.01538462 | Up |
| ETV1      | 1 | geneontol | 0.01538462 | Up |
| FABP3     | 1 | geneontol | 0.01538462 | Up |
| IRF7      | 1 | geneontol | 0.01538462 | Up |

|           |   |           |            |    |
|-----------|---|-----------|------------|----|
| CACNA1S   | 1 | geneontol | 0.01538462 | Up |
| DVL1      | 1 | geneontol | 0.01538462 | Up |
| TULP1     | 1 | geneontol | 0.01538462 | Up |
| CHRNA2/IL | 2 | geneontol | 0.03076923 | Up |
| PARP14/SE | 2 | geneontol | 0.03076923 | Up |
| DVL1/ALX1 | 2 | geneontol | 0.03076923 | Up |
| ITGA8/SIG | 3 | geneontol | 0.04615385 | Up |
| IL13/RSAC | 2 | geneontol | 0.03076923 | Up |
| CHRNA2/IL | 3 | geneontol | 0.04615385 | Up |
| NME9      | 1 | geneontol | 0.01538462 | Up |
| SCO2      | 1 | geneontol | 0.01538462 | Up |
| HR        | 1 | geneontol | 0.01538462 | Up |
| NME9      | 1 | geneontol | 0.01538462 | Up |
| CMPK2     | 1 | geneontol | 0.01538462 | Up |
| DVL1      | 1 | geneontol | 0.01538462 | Up |
| DVL1      | 1 | geneontol | 0.01538462 | Up |
| NME9      | 1 | geneontol | 0.01538462 | Up |
| SOX1/DMRT | 2 | geneontol | 0.03076923 | Up |
| PIM3/RSAC | 2 | geneontol | 0.03076923 | Up |
| IL13/THY1 | 2 | geneontol | 0.03076923 | Up |
| AKR1C1/FA | 2 | geneontol | 0.03076923 | Up |
| AKR1C1/FA | 2 | geneontol | 0.03076923 | Up |
| DVL1/ITGA | 2 | geneontol | 0.03076923 | Up |
| DVL1/CHRN | 2 | geneontol | 0.03076923 | Up |
| CACNA1S/C | 2 | geneontol | 0.03076923 | Up |
| ETV1      | 1 | geneontol | 0.01538462 | Up |
| NME9      | 1 | geneontol | 0.01538462 | Up |
| RSAD2     | 1 | geneontol | 0.01538462 | Up |
| AKR1C1    | 1 | geneontol | 0.01538462 | Up |
| DVL1      | 1 | geneontol | 0.01538462 | Up |
| DVL1      | 1 | geneontol | 0.01538462 | Up |
| THY1      | 1 | geneontol | 0.01538462 | Up |
| DVL1      | 1 | geneontol | 0.01538462 | Up |
| DVL1/ALX1 | 2 | geneontol | 0.03076923 | Up |
| DVL1/CHRN | 2 | geneontol | 0.03076923 | Up |
| DVL1/ADCY | 2 | geneontol | 0.03076923 | Up |
| ITGA8/THY | 2 | geneontol | 0.03076923 | Up |
| DVL1/CHRN | 3 | geneontol | 0.04615385 | Up |
| RSAD2     | 1 | geneontol | 0.01538462 | Up |
| NME9      | 1 | geneontol | 0.01538462 | Up |
| CMPK2     | 1 | geneontol | 0.01538462 | Up |
| CHRNA2    | 1 | geneontol | 0.01538462 | Up |
| IL13      | 1 | geneontol | 0.01538462 | Up |
| IRF7      | 1 | geneontol | 0.01538462 | Up |
| THY1      | 1 | geneontol | 0.01538462 | Up |
| DMRT3     | 1 | geneontol | 0.01538462 | Up |
| PARP14    | 1 | geneontol | 0.01538462 | Up |
| IL13      | 1 | geneontol | 0.01538462 | Up |
| CMTR1     | 1 | geneontol | 0.01538462 | Up |
| SOX1/DMRT | 2 | geneontol | 0.03076923 | Up |
| NME9/CMPK | 2 | geneontol | 0.03076923 | Up |



|           |             |            |    |
|-----------|-------------|------------|----|
| PYCR3     | 1 geneontol | 0.01538462 | Up |
| AKR1C1    | 1 geneontol | 0.01538462 | Up |
| CACNA1S   | 1 geneontol | 0.01538462 | Up |
| DVL1      | 1 geneontol | 0.01538462 | Up |
| FABP3     | 1 geneontol | 0.01538462 | Up |
| SIGLEC1   | 1 geneontol | 0.01538462 | Up |
| SCO2      | 1 geneontol | 0.01538462 | Up |
| FABP3     | 1 geneontol | 0.01538462 | Up |
| CEP97     | 1 geneontol | 0.01538462 | Up |
| SLC26A8   | 1 geneontol | 0.01538462 | Up |
| DVL1/CHRN | 2 geneontol | 0.03076923 | Up |
| NDRG1/CSR | 2 geneontol | 0.03076923 | Up |
| DVL1/CHRN | 2 geneontol | 0.03076923 | Up |
| CACNA1S/C | 4 geneontol | 0.06153846 | Up |
| SCO2      | 1 geneontol | 0.01538462 | Up |
| SERPING1  | 1 geneontol | 0.01538462 | Up |
| SLC26A8   | 1 geneontol | 0.01538462 | Up |
| CMPK2     | 1 geneontol | 0.01538462 | Up |
| ADCY5     | 1 geneontol | 0.01538462 | Up |
| DVL1      | 1 geneontol | 0.01538462 | Up |
| CSRP3     | 1 geneontol | 0.01538462 | Up |
| BATF2     | 1 geneontol | 0.01538462 | Up |
| NDRG1     | 1 geneontol | 0.01538462 | Up |
| CHRN2     | 1 geneontol | 0.01538462 | Up |
| REEP2     | 1 geneontol | 0.01538462 | Up |
| DVL1      | 1 geneontol | 0.01538462 | Up |
| LHB/AKR1C | 3 geneontol | 0.04615385 | Up |
| DVL1/PARF | 4 geneontol | 0.06153846 | Up |
| DVL1/NDRG | 4 geneontol | 0.06153846 | Up |
| PARP14/IL | 3 geneontol | 0.04615385 | Up |
| IL13/THY1 | 2 geneontol | 0.03076923 | Up |
| DVL1/IGFN | 4 geneontol | 0.06153846 | Up |
| IL13/THY1 | 2 geneontol | 0.03076923 | Up |
| CMPK2     | 1 geneontol | 0.01538462 | Up |
| HES7      | 1 geneontol | 0.01538462 | Up |
| DDX60     | 1 geneontol | 0.01538462 | Up |
| CHRN2     | 1 geneontol | 0.01538462 | Up |
| CHRN2     | 1 geneontol | 0.01538462 | Up |
| TULP1     | 1 geneontol | 0.01538462 | Up |
| TULP1     | 1 geneontol | 0.01538462 | Up |
| CSRP3     | 1 geneontol | 0.01538462 | Up |
| AKR1C1    | 1 geneontol | 0.01538462 | Up |
| NME9/CMPK | 3 geneontol | 0.04615385 | Up |
| DVL1/CHRN | 2 geneontol | 0.03076923 | Up |
| CHRN2/IT  | 2 geneontol | 0.03076923 | Up |
| DVL1/CHRN | 2 geneontol | 0.03076923 | Up |
| IL13/THY1 | 2 geneontol | 0.03076923 | Up |
| LHB/AKR1C | 2 geneontol | 0.03076923 | Up |
| PARP14/IL | 3 geneontol | 0.04615385 | Up |
| NME9/CMPK | 3 geneontol | 0.04615385 | Up |
| CHRN2/IL  | 2 geneontol | 0.03076923 | Up |

|           |   |           |            |    |
|-----------|---|-----------|------------|----|
| IL13/THY1 | 2 | geneontol | 0.03076923 | Up |
| RSAD2     | 1 | geneontol | 0.01538462 | Up |
| IRF7      | 1 | geneontol | 0.01538462 | Up |
| FABP3     | 1 | geneontol | 0.01538462 | Up |
| AKR1C1    | 1 | geneontol | 0.01538462 | Up |
| FABP3     | 1 | geneontol | 0.01538462 | Up |
| DVL1/ITGA | 2 | geneontol | 0.03076923 | Up |
| IRF7/IL13 | 4 | geneontol | 0.06153846 | Up |
| TNFSF10/A | 4 | geneontol | 0.06153846 | Up |
| IL13/THY1 | 2 | geneontol | 0.03076923 | Up |
| DVL1/ALX1 | 2 | geneontol | 0.03076923 | Up |
| CHRN2/AC  | 2 | geneontol | 0.03076923 | Up |
| DVL1/CDX4 | 4 | geneontol | 0.06153846 | Up |
| THY1      | 1 | geneontol | 0.01538462 | Up |
| AKR1C1    | 1 | geneontol | 0.01538462 | Up |
| LAMP3     | 1 | geneontol | 0.01538462 | Up |
| AKR1C1    | 1 | geneontol | 0.01538462 | Up |
| DVL1      | 1 | geneontol | 0.01538462 | Up |
| LHB/TNFSF | 3 | geneontol | 0.04615385 | Up |
| NME9/AKR1 | 2 | geneontol | 0.03076923 | Up |
| SOX1      | 1 | geneontol | 0.01538462 | Up |
| IRF7      | 1 | geneontol | 0.01538462 | Up |
| ADCY5     | 1 | geneontol | 0.01538462 | Up |
| NME9      | 1 | geneontol | 0.01538462 | Up |
| IL13      | 1 | geneontol | 0.01538462 | Up |
| SCO2      | 1 | geneontol | 0.01538462 | Up |
| DDX60     | 1 | geneontol | 0.01538462 | Up |
| CHRN2     | 1 | geneontol | 0.01538462 | Up |
| IRF7      | 1 | geneontol | 0.01538462 | Up |
| ADCY5     | 1 | geneontol | 0.01538462 | Up |
| CHRN2     | 1 | geneontol | 0.01538462 | Up |
| ADCY5     | 1 | geneontol | 0.01538462 | Up |
| IL13      | 1 | geneontol | 0.01538462 | Up |
| TNFSF10/C | 3 | geneontol | 0.04615385 | Up |
| PIM3/IL13 | 4 | geneontol | 0.06153846 | Up |
| PIM3/IL13 | 4 | geneontol | 0.06153846 | Up |
| CHRN2     | 1 | geneontol | 0.01538462 | Up |
| IL13      | 1 | geneontol | 0.01538462 | Up |
| RSAD2     | 1 | geneontol | 0.01538462 | Up |
| NME9      | 1 | geneontol | 0.01538462 | Up |
| NME9      | 1 | geneontol | 0.01538462 | Up |
| NME9      | 1 | geneontol | 0.01538462 | Up |
| THY1      | 1 | geneontol | 0.01538462 | Up |
| IL13      | 1 | geneontol | 0.01538462 | Up |
| NME9/CMPK | 2 | geneontol | 0.03076923 | Up |
| DVL1/ALX1 | 2 | geneontol | 0.03076923 | Up |
| ITGA8/HES | 2 | geneontol | 0.03076923 | Up |
| LHB/AKR1C | 2 | geneontol | 0.03076923 | Up |
| PIM3/ADCY | 2 | geneontol | 0.03076923 | Up |
| IL13/RSAC | 4 | geneontol | 0.06153846 | Up |
| PIM3/IL13 | 4 | geneontol | 0.06153846 | Up |

|           |   |           |            |    |
|-----------|---|-----------|------------|----|
| NME9/CMPK | 2 | geneontol | 0.03076923 | Up |
| CACNA1S/C | 4 | geneontol | 0.06153846 | Up |
| NME9      | 1 | geneontol | 0.01538462 | Up |
| CMTR1     | 1 | geneontol | 0.01538462 | Up |
| IL13      | 1 | geneontol | 0.01538462 | Up |
| RSAD2     | 1 | geneontol | 0.01538462 | Up |
| ITGA8     | 1 | geneontol | 0.01538462 | Up |
| DVL1      | 1 | geneontol | 0.01538462 | Up |
| CEP97     | 1 | geneontol | 0.01538462 | Up |
| CHRNA2/IL | 2 | geneontol | 0.03076923 | Up |
| PIM3/ADCY | 2 | geneontol | 0.03076923 | Up |
| CHRNA2/DM | 2 | geneontol | 0.03076923 | Up |
| CHRNA2/IL | 2 | geneontol | 0.03076923 | Up |
| PIM3/ADCY | 2 | geneontol | 0.03076923 | Up |
| IL13/RSAC | 2 | geneontol | 0.03076923 | Up |
| CACNA1S/C | 4 | geneontol | 0.06153846 | Up |
| IGFN1     | 1 | geneontol | 0.01538462 | Up |
| CHRNA2    | 1 | geneontol | 0.01538462 | Up |
| IRF7      | 1 | geneontol | 0.01538462 | Up |
| RSAD2     | 1 | geneontol | 0.01538462 | Up |
| DDX60     | 1 | geneontol | 0.01538462 | Up |
| IL13      | 1 | geneontol | 0.01538462 | Up |
| NME9      | 1 | geneontol | 0.01538462 | Up |
| THY1      | 1 | geneontol | 0.01538462 | Up |
| PARP14    | 1 | geneontol | 0.01538462 | Up |
| PARP14    | 1 | geneontol | 0.01538462 | Up |
| IL13/THY1 | 2 | geneontol | 0.03076923 | Up |
| DVL1/CHRN | 4 | geneontol | 0.06153846 | Up |
| LHB/TNFSF | 2 | geneontol | 0.03076923 | Up |
| TULP1/CSR | 2 | geneontol | 0.03076923 | Up |
| LHB       | 1 | geneontol | 0.01538462 | Up |
| SCO2      | 1 | geneontol | 0.01538462 | Up |
| SOX1      | 1 | geneontol | 0.01538462 | Up |
| CHRNA2    | 1 | geneontol | 0.01538462 | Up |
| THY1      | 1 | geneontol | 0.01538462 | Up |
| SERPING1  | 1 | geneontol | 0.01538462 | Up |
| BATF2     | 1 | geneontol | 0.01538462 | Up |
| THY1      | 1 | geneontol | 0.01538462 | Up |
| RHBG      | 1 | geneontol | 0.01538462 | Up |
| ADCY5     | 1 | geneontol | 0.01538462 | Up |
| DVL1      | 1 | geneontol | 0.01538462 | Up |
| DVL1/ITGA | 3 | geneontol | 0.04615385 | Up |
| PARP14/IL | 2 | geneontol | 0.03076923 | Up |
| LHB/TNFSF | 2 | geneontol | 0.03076923 | Up |
| CACNA1S/C | 3 | geneontol | 0.04615385 | Up |
| CACNA1S/K | 4 | geneontol | 0.06153846 | Up |
| CHRNA2/HE | 3 | geneontol | 0.04615385 | Up |
| IL13/RSAC | 2 | geneontol | 0.03076923 | Up |
| TULP1/CSR | 2 | geneontol | 0.03076923 | Up |
| DVL1/CHRN | 2 | geneontol | 0.03076923 | Up |
| BATF2     | 1 | geneontol | 0.01538462 | Up |

|            |   |           |            |    |
|------------|---|-----------|------------|----|
| CHRNA2     | 1 | geneontol | 0.01538462 | Up |
| CSRP3      | 1 | geneontol | 0.01538462 | Up |
| FBXO6      | 1 | geneontol | 0.01538462 | Up |
| DMRT3      | 1 | geneontol | 0.01538462 | Up |
| IRF7       | 1 | geneontol | 0.01538462 | Up |
| DMRT3      | 1 | geneontol | 0.01538462 | Up |
| PARP14     | 1 | geneontol | 0.01538462 | Up |
| DVL1       | 1 | geneontol | 0.01538462 | Up |
| DVL1       | 1 | geneontol | 0.01538462 | Up |
| PIM3/ADCY  | 2 | geneontol | 0.03076923 | Up |
| DVL1/CHRNA | 2 | geneontol | 0.03076923 | Up |
| IL13/THY1  | 2 | geneontol | 0.03076923 | Up |
| DVL1       | 1 | geneontol | 0.01538462 | Up |
| NDRG1      | 1 | geneontol | 0.01538462 | Up |
| NDRG1      | 1 | geneontol | 0.01538462 | Up |
| CHRNA2     | 1 | geneontol | 0.01538462 | Up |
| SERPING1   | 1 | geneontol | 0.01538462 | Up |
| SERPING1   | 1 | geneontol | 0.01538462 | Up |
| TNFSF10    | 1 | geneontol | 0.01538462 | Up |
| CHRNA2     | 1 | geneontol | 0.01538462 | Up |
| FABP3      | 1 | geneontol | 0.01538462 | Up |
| DVL1       | 1 | geneontol | 0.01538462 | Up |
| CACNA1S/I  | 3 | geneontol | 0.04615385 | Up |
| DVL1/CHRNA | 4 | geneontol | 0.06153846 | Up |
| DVL1/ALX1  | 2 | geneontol | 0.03076923 | Up |
| CHRNA2/IL  | 2 | geneontol | 0.03076923 | Up |
| BATF2      | 1 | geneontol | 0.01538462 | Up |
| AKR1C1     | 1 | geneontol | 0.01538462 | Up |
| CHRNA2     | 1 | geneontol | 0.01538462 | Up |
| IRF7       | 1 | geneontol | 0.01538462 | Up |
| IL13       | 1 | geneontol | 0.01538462 | Up |
| SLC26A8    | 1 | geneontol | 0.01538462 | Up |
| THY1       | 1 | geneontol | 0.01538462 | Up |
| HR         | 1 | geneontol | 0.01538462 | Up |
| DMRT3      | 1 | geneontol | 0.01538462 | Up |
| THY1       | 1 | geneontol | 0.01538462 | Up |
| DVL1/ALX1  | 2 | geneontol | 0.03076923 | Up |
| CHRNA2/IL  | 2 | geneontol | 0.03076923 | Up |
| PIM3/RSAC  | 2 | geneontol | 0.03076923 | Up |
| PARP14/IL  | 2 | geneontol | 0.03076923 | Up |
| IRF7/RSAC  | 2 | geneontol | 0.03076923 | Up |
| IL13/THY1  | 2 | geneontol | 0.03076923 | Up |
| PIM3/ADCY  | 2 | geneontol | 0.03076923 | Up |
| CHRNA2     | 1 | geneontol | 0.01538462 | Up |
| HR         | 1 | geneontol | 0.01538462 | Up |
| ITGA8      | 1 | geneontol | 0.01538462 | Up |
| IRF7       | 1 | geneontol | 0.01538462 | Up |
| IRF7       | 1 | geneontol | 0.01538462 | Up |
| CEP97      | 1 | geneontol | 0.01538462 | Up |
| ITGA8      | 1 | geneontol | 0.01538462 | Up |
| CHRNA2     | 1 | geneontol | 0.01538462 | Up |

|           |   |           |            |    |
|-----------|---|-----------|------------|----|
| CHRNA2    | 1 | geneontol | 0.01538462 | Up |
| NME9/CMPK | 2 | geneontol | 0.03076923 | Up |
| PIM3/RSAC | 2 | geneontol | 0.03076923 | Up |
| RSAD2     | 1 | geneontol | 0.01538462 | Up |
| CMPK2     | 1 | geneontol | 0.01538462 | Up |
| NDRG1     | 1 | geneontol | 0.01538462 | Up |
| THY1      | 1 | geneontol | 0.01538462 | Up |
| IL13/THY1 | 2 | geneontol | 0.03076923 | Up |
| PARP14/SE | 2 | geneontol | 0.03076923 | Up |
| RSAD2     | 1 | geneontol | 0.01538462 | Up |
| HR        | 1 | geneontol | 0.01538462 | Up |
| HR        | 1 | geneontol | 0.01538462 | Up |
| IL13      | 1 | geneontol | 0.01538462 | Up |
| FABP3     | 1 | geneontol | 0.01538462 | Up |
| CSR3P3    | 1 | geneontol | 0.01538462 | Up |
| THY1      | 1 | geneontol | 0.01538462 | Up |
| PARP14    | 1 | geneontol | 0.01538462 | Up |
| IL13/THY1 | 2 | geneontol | 0.03076923 | Up |
| THY1      | 1 | geneontol | 0.01538462 | Up |
| CMTR1     | 1 | geneontol | 0.01538462 | Up |
| CMPK2     | 1 | geneontol | 0.01538462 | Up |
| IL13      | 1 | geneontol | 0.01538462 | Up |
| IRF7      | 1 | geneontol | 0.01538462 | Up |
| ADCY5     | 1 | geneontol | 0.01538462 | Up |
| LHB       | 1 | geneontol | 0.01538462 | Up |
| PARP14    | 1 | geneontol | 0.01538462 | Up |
| IL13/CMPK | 3 | geneontol | 0.04615385 | Up |
| DVL1/ALX1 | 2 | geneontol | 0.03076923 | Up |
| AKR1C1/FA | 2 | geneontol | 0.03076923 | Up |
| PARP14/IL | 2 | geneontol | 0.03076923 | Up |
| IRF7      | 1 | geneontol | 0.01538462 | Up |
| IL13      | 1 | geneontol | 0.01538462 | Up |
| CMTR1     | 1 | geneontol | 0.01538462 | Up |
| CHRNA2    | 1 | geneontol | 0.01538462 | Up |
| CMTR1     | 1 | geneontol | 0.01538462 | Up |
| SMTNL2    | 1 | geneontol | 0.01538462 | Up |
| GPR157    | 1 | geneontol | 0.01538462 | Up |
| CEP97     | 1 | geneontol | 0.01538462 | Up |
| IL13      | 1 | geneontol | 0.01538462 | Up |
| PIM3/RSAC | 2 | geneontol | 0.03076923 | Up |
| PARP14    | 1 | geneontol | 0.01538462 | Up |
| CMPK2     | 1 | geneontol | 0.01538462 | Up |
| CHRNA2    | 1 | geneontol | 0.01538462 | Up |
| CHRNA2    | 1 | geneontol | 0.01538462 | Up |
| LHB       | 1 | geneontol | 0.01538462 | Up |
| ITGA8     | 1 | geneontol | 0.01538462 | Up |
| PARP14    | 1 | geneontol | 0.01538462 | Up |
| CACNA1S   | 1 | geneontol | 0.01538462 | Up |
| LHB       | 1 | geneontol | 0.01538462 | Up |
| IRF7/RSAC | 2 | geneontol | 0.03076923 | Up |
| IGFN1/PCC | 2 | geneontol | 0.03076923 | Up |

|            |             |            |    |
|------------|-------------|------------|----|
| IRF7       | 1 geneontol | 0.01538462 | Up |
| CHRNA2     | 1 geneontol | 0.01538462 | Up |
| ADCY5      | 1 geneontol | 0.01538462 | Up |
| PIM3       | 1 geneontol | 0.01538462 | Up |
| IL13       | 1 geneontol | 0.01538462 | Up |
| AKR1C1     | 1 geneontol | 0.01538462 | Up |
| DVL1/CHRNA | 2 geneontol | 0.03076923 | Up |
| NME9/ADCY  | 2 geneontol | 0.03076923 | Up |
| DVL1/NDRG  | 2 geneontol | 0.03076923 | Up |
| SLC26A8/A  | 3 geneontol | 0.04615385 | Up |
| ADCY5      | 1 geneontol | 0.01538462 | Up |
| SCO2       | 1 geneontol | 0.01538462 | Up |
| IL13       | 1 geneontol | 0.01538462 | Up |
| CHRNA2     | 1 geneontol | 0.01538462 | Up |
| AKR1C1/FA  | 2 geneontol | 0.03076923 | Up |
| PARP14/IL  | 2 geneontol | 0.03076923 | Up |
| DVL1/CHRNA | 2 geneontol | 0.03076923 | Up |
| DVL1/CHRNA | 2 geneontol | 0.03076923 | Up |
| SLC26A8/A  | 3 geneontol | 0.04615385 | Up |
| FABP3      | 1 geneontol | 0.01538462 | Up |
| IRF7       | 1 geneontol | 0.01538462 | Up |
| IL13       | 1 geneontol | 0.01538462 | Up |
| CHRNA2     | 1 geneontol | 0.01538462 | Up |
| IL13       | 1 geneontol | 0.01538462 | Up |
| CEP97      | 1 geneontol | 0.01538462 | Up |
| IRF7       | 1 geneontol | 0.01538462 | Up |
| IL13/CMPK  | 3 geneontol | 0.04615385 | Up |
| CHRNA2/IL  | 3 geneontol | 0.04615385 | Up |
| IL13/THY1  | 2 geneontol | 0.03076923 | Up |
| FABP3      | 1 geneontol | 0.01538462 | Up |
| ADCY5      | 1 geneontol | 0.01538462 | Up |
| NME9       | 1 geneontol | 0.01538462 | Up |
| NDRG1      | 1 geneontol | 0.01538462 | Up |
| RSAD2      | 1 geneontol | 0.01538462 | Up |
| NME9       | 1 geneontol | 0.01538462 | Up |
| CEP97      | 1 geneontol | 0.01538462 | Up |
| ITGA8/SIG  | 3 geneontol | 0.04615385 | Up |
| PIM3/ADCY  | 2 geneontol | 0.03076923 | Up |
| ADCY5      | 1 geneontol | 0.01538462 | Up |
| FABP3      | 1 geneontol | 0.01538462 | Up |
| CHRNA2     | 1 geneontol | 0.01538462 | Up |
| AKR1C1     | 1 geneontol | 0.01538462 | Up |
| IRF7/RSAD  | 3 geneontol | 0.04615385 | Up |
| DVL1       | 1 geneontol | 0.01538462 | Up |
| ADCY5      | 1 geneontol | 0.01538462 | Up |
| TULP1      | 1 geneontol | 0.01538462 | Up |
| REEP2      | 1 geneontol | 0.01538462 | Up |
| IL13       | 1 geneontol | 0.01538462 | Up |
| TNFSF10    | 1 geneontol | 0.01538462 | Up |
| NME9/ADCY  | 2 geneontol | 0.03076923 | Up |
| PIM3       | 1 geneontol | 0.01538462 | Up |

|           |   |           |            |    |
|-----------|---|-----------|------------|----|
| IRF7/RSAC | 3 | geneontol | 0.04615385 | Up |
| THY1/CEP9 | 2 | geneontol | 0.03076923 | Up |
| TNFSF10/I | 2 | geneontol | 0.03076923 | Up |
| RSAD2     | 1 | geneontol | 0.01538462 | Up |
| SLC26A8   | 1 | geneontol | 0.01538462 | Up |
| THY1      | 1 | geneontol | 0.01538462 | Up |
| NME9      | 1 | geneontol | 0.01538462 | Up |
| DVL1/ITGA | 2 | geneontol | 0.03076923 | Up |
| PARP14/IL | 3 | geneontol | 0.04615385 | Up |
| PIM3/RSAC | 2 | geneontol | 0.03076923 | Up |
| PARP14/IL | 3 | geneontol | 0.04615385 | Up |
| IL13      | 1 | geneontol | 0.01538462 | Up |
| LHB       | 1 | geneontol | 0.01538462 | Up |
| BATF2     | 1 | geneontol | 0.01538462 | Up |
| DVL1/LAMP | 2 | geneontol | 0.03076923 | Up |
| IL13      | 1 | geneontol | 0.01538462 | Up |
| FABP3     | 1 | geneontol | 0.01538462 | Up |
| CSRP3     | 1 | geneontol | 0.01538462 | Up |
| SIGLEC1   | 1 | geneontol | 0.01538462 | Up |
| DVL1      | 1 | geneontol | 0.01538462 | Up |
| NME9/ADCY | 2 | geneontol | 0.03076923 | Up |
| PARP14/IL | 2 | geneontol | 0.03076923 | Up |
| CHRN2/IL  | 2 | geneontol | 0.03076923 | Up |
| CDX4/TENT | 3 | geneontol | 0.04615385 | Up |
| CSRP3     | 1 | geneontol | 0.01538462 | Up |
| NME9/ADCY | 2 | geneontol | 0.03076923 | Up |
| PIM3/ADCY | 2 | geneontol | 0.03076923 | Up |
| DVL1/ITGA | 2 | geneontol | 0.03076923 | Up |
| CHRN2     | 1 | geneontol | 0.01538462 | Up |
| IL13      | 1 | geneontol | 0.01538462 | Up |
| IL13      | 1 | geneontol | 0.01538462 | Up |
| DVL1/CHRN | 2 | geneontol | 0.03076923 | Up |
| CHRN2/TH  | 2 | geneontol | 0.03076923 | Up |
| IL13      | 1 | geneontol | 0.01538462 | Up |
| AKR1C1    | 1 | geneontol | 0.01538462 | Up |
| IRF7      | 1 | geneontol | 0.01538462 | Up |
| CHRN2     | 1 | geneontol | 0.01538462 | Up |
| FABP3     | 1 | geneontol | 0.01538462 | Up |
| FABP3     | 1 | geneontol | 0.01538462 | Up |
| IL13      | 1 | geneontol | 0.01538462 | Up |
| APOL6/AKR | 3 | geneontol | 0.04615385 | Up |
| PIM3/ADCY | 2 | geneontol | 0.03076923 | Up |
| IL13      | 1 | geneontol | 0.01538462 | Up |
| IL13      | 1 | geneontol | 0.01538462 | Up |
| AKR1C1    | 1 | geneontol | 0.01538462 | Up |
| AKR1C1    | 1 | geneontol | 0.01538462 | Up |
| CHRN2     | 1 | geneontol | 0.01538462 | Up |
| CDX4      | 1 | geneontol | 0.01538462 | Up |
| SLC26A8   | 1 | geneontol | 0.01538462 | Up |
| TNFSF10   | 1 | geneontol | 0.01538462 | Up |
| LHB       | 1 | geneontol | 0.01538462 | Up |

|           |             |            |    |
|-----------|-------------|------------|----|
| IRF7      | 1 geneontol | 0.01538462 | Up |
| CACNA1S/E | 2 geneontol | 0.03076923 | Up |
| IL13      | 1 geneontol | 0.01538462 | Up |
| IL13      | 1 geneontol | 0.01538462 | Up |
| RSAD2     | 1 geneontol | 0.01538462 | Up |
| DVL1      | 1 geneontol | 0.01538462 | Up |
| ALX1      | 1 geneontol | 0.01538462 | Up |
| SERPING1  | 1 geneontol | 0.01538462 | Up |
| IRF7      | 1 geneontol | 0.01538462 | Up |
| FABP3     | 1 geneontol | 0.01538462 | Up |
| DVL1      | 1 geneontol | 0.01538462 | Up |
| FABP3     | 1 geneontol | 0.01538462 | Up |
| PIM3/ADCY | 2 geneontol | 0.03076923 | Up |
| NME9/ADCY | 2 geneontol | 0.03076923 | Up |
| CHRNA2    | 1 geneontol | 0.01538462 | Up |
| SOX1      | 1 geneontol | 0.01538462 | Up |
| IL13      | 1 geneontol | 0.01538462 | Up |
| TENT5C    | 1 geneontol | 0.01538462 | Up |
| ADCY5     | 1 geneontol | 0.01538462 | Up |
| DVL1      | 1 geneontol | 0.01538462 | Up |
| SERPING1  | 1 geneontol | 0.01538462 | Up |
| IRF7/BATF | 2 geneontol | 0.03076923 | Up |
| IL13/THY1 | 2 geneontol | 0.03076923 | Up |
| CHRNA2/IL | 3 geneontol | 0.04615385 | Up |
| CDX4      | 1 geneontol | 0.01538462 | Up |
| TNFSF10   | 1 geneontol | 0.01538462 | Up |
| IL13/RSAC | 2 geneontol | 0.03076923 | Up |
| PIM3/ADCY | 2 geneontol | 0.03076923 | Up |
| PIM3/ADCY | 2 geneontol | 0.03076923 | Up |
| CHRNA2    | 1 geneontol | 0.01538462 | Up |
| DVL1      | 1 geneontol | 0.01538462 | Up |
| DVL1      | 1 geneontol | 0.01538462 | Up |
| LAMP3/TNF | 2 geneontol | 0.03076923 | Up |
| CHRNA2    | 1 geneontol | 0.01538462 | Up |
| CHRNA2    | 1 geneontol | 0.01538462 | Up |
| IL13      | 1 geneontol | 0.01538462 | Up |
| IL13/THY1 | 2 geneontol | 0.03076923 | Up |
| CHRNA2/GF | 2 geneontol | 0.03076923 | Up |
| THY1      | 1 geneontol | 0.01538462 | Up |
| RSAD2     | 1 geneontol | 0.01538462 | Up |
| CHRNA2    | 1 geneontol | 0.01538462 | Up |
| SERPING1  | 1 geneontol | 0.01538462 | Up |
| ZWINT/FBX | 2 geneontol | 0.03076923 | Up |
| CHRNA2/IL | 2 geneontol | 0.03076923 | Up |
| DVL1/CHRN | 2 geneontol | 0.03076923 | Up |
| ALX1      | 1 geneontol | 0.01538462 | Up |
| CEP97     | 1 geneontol | 0.01538462 | Up |
| IL13      | 1 geneontol | 0.01538462 | Up |
| CHRNA2/IL | 2 geneontol | 0.03076923 | Up |
| LHB/AKR1C | 2 geneontol | 0.03076923 | Up |
| CHRNA2/IL | 3 geneontol | 0.04615385 | Up |



|           |             |            |    |
|-----------|-------------|------------|----|
| AKR1C1    | 1 geneontol | 0.01538462 | Up |
| DVL1      | 1 geneontol | 0.01538462 | Up |
| CHRNA2    | 1 geneontol | 0.01538462 | Up |
| CHRNA2    | 1 geneontol | 0.01538462 | Up |
| LHB/TNFSF | 2 geneontol | 0.03076923 | Up |
| DVL1/ITGA | 2 geneontol | 0.03076923 | Up |
| DVL1      | 1 geneontol | 0.01538462 | Up |
| IL13      | 1 geneontol | 0.01538462 | Up |
| TENT5C    | 1 geneontol | 0.01538462 | Up |
| NME9      | 1 geneontol | 0.01538462 | Up |
| TENT5C    | 1 geneontol | 0.01538462 | Up |
| FABP3     | 1 geneontol | 0.01538462 | Up |
| DVL1/LAMP | 2 geneontol | 0.03076923 | Up |
| IRF7/SERF | 2 geneontol | 0.03076923 | Up |
| THY1      | 1 geneontol | 0.01538462 | Up |
| IL13      | 1 geneontol | 0.01538462 | Up |
| NME9      | 1 geneontol | 0.01538462 | Up |
| LAMP3     | 1 geneontol | 0.01538462 | Up |
| DVL1/CHRN | 2 geneontol | 0.03076923 | Up |
| LHB/TNFSF | 2 geneontol | 0.03076923 | Up |
| TNFSF10   | 1 geneontol | 0.01538462 | Up |
| SMTNL2    | 1 geneontol | 0.01538462 | Up |
| IL13      | 1 geneontol | 0.01538462 | Up |
| IL13      | 1 geneontol | 0.01538462 | Up |
| NDRG1/GPR | 2 geneontol | 0.03076923 | Up |
| IRF7/SERF | 2 geneontol | 0.03076923 | Up |
| LAMP3/TNF | 3 geneontol | 0.04615385 | Up |
| SOX1      | 1 geneontol | 0.01538462 | Up |
| NME9      | 1 geneontol | 0.01538462 | Up |
| PIM3      | 1 geneontol | 0.01538462 | Up |
| TULP1     | 1 geneontol | 0.01538462 | Up |
| TNFSF10   | 1 geneontol | 0.01538462 | Up |
| PIM3/ADCY | 2 geneontol | 0.03076923 | Up |
| THY1      | 1 geneontol | 0.01538462 | Up |
| CHRNA2    | 1 geneontol | 0.01538462 | Up |
| FABP3     | 1 geneontol | 0.01538462 | Up |
| DVL1      | 1 geneontol | 0.01538462 | Up |
| IL13      | 1 geneontol | 0.01538462 | Up |
| APOL6/AKR | 3 geneontol | 0.04615385 | Up |
| DVL1/CHRN | 2 geneontol | 0.03076923 | Up |
| AKR1C1    | 1 geneontol | 0.01538462 | Up |
| DVL1      | 1 geneontol | 0.01538462 | Up |
| IL13      | 1 geneontol | 0.01538462 | Up |
| THY1      | 1 geneontol | 0.01538462 | Up |
| THY1      | 1 geneontol | 0.01538462 | Up |
| LHB/CDX4/ | 3 geneontol | 0.04615385 | Up |
| PIM3/THY1 | 2 geneontol | 0.03076923 | Up |
| DVL1/PARF | 3 geneontol | 0.04615385 | Up |
| TULP1     | 1 geneontol | 0.01538462 | Up |
| SIGLEC1   | 1 geneontol | 0.01538462 | Up |
| REEP2     | 1 geneontol | 0.01538462 | Up |

|           |   |           |            |    |
|-----------|---|-----------|------------|----|
| LAMP3/TNF | 2 | geneontol | 0.03076923 | Up |
| LHB/CDX4/ | 3 | geneontol | 0.04615385 | Up |
| CHRN2/IL  | 2 | geneontol | 0.03076923 | Up |
| CHRN2     | 1 | geneontol | 0.01538462 | Up |
| NME9      | 1 | geneontol | 0.01538462 | Up |
| DVL1      | 1 | geneontol | 0.01538462 | Up |
| CEP97     | 1 | geneontol | 0.01538462 | Up |
| NME9      | 1 | geneontol | 0.01538462 | Up |
| SIGLEC1   | 1 | geneontol | 0.01538462 | Up |
| THY1      | 1 | geneontol | 0.01538462 | Up |
| PYCR3     | 1 | geneontol | 0.01538462 | Up |
| SIGLEC1   | 1 | geneontol | 0.01538462 | Up |
| CSRP3     | 1 | geneontol | 0.01538462 | Up |
| FABP3     | 1 | geneontol | 0.01538462 | Up |
| THY1      | 1 | geneontol | 0.01538462 | Up |
| DVL1/THY1 | 2 | geneontol | 0.03076923 | Up |
| IL13      | 1 | geneontol | 0.01538462 | Up |
| LHB       | 1 | geneontol | 0.01538462 | Up |
| TULP1     | 1 | geneontol | 0.01538462 | Up |
| IL13      | 1 | geneontol | 0.01538462 | Up |
| TENT5C    | 1 | geneontol | 0.01538462 | Up |
| THY1      | 1 | geneontol | 0.01538462 | Up |
| PARP14/SE | 3 | geneontol | 0.04615385 | Up |
| IRF7/DDX6 | 2 | geneontol | 0.03076923 | Up |
| HES7      | 1 | geneontol | 0.01538462 | Up |
| FABP3     | 1 | geneontol | 0.01538462 | Up |
| THY1      | 1 | geneontol | 0.01538462 | Up |
| CHRN2     | 1 | geneontol | 0.01538462 | Up |
| TNFSF10/I | 2 | geneontol | 0.03076923 | Up |
| LAMP3/TNF | 3 | geneontol | 0.04615385 | Up |
| IL13/THY1 | 2 | geneontol | 0.03076923 | Up |
| REEP2     | 1 | geneontol | 0.01538462 | Up |
| NME9      | 1 | geneontol | 0.01538462 | Up |
| SCO2      | 1 | geneontol | 0.01538462 | Up |
| ADCY5     | 1 | geneontol | 0.01538462 | Up |
| DVL1/DMRT | 2 | geneontol | 0.03076923 | Up |
| NDRG1/REE | 3 | geneontol | 0.04615385 | Up |
| NME9      | 1 | geneontol | 0.01538462 | Up |
| CMPK2     | 1 | geneontol | 0.01538462 | Up |
| DMRT3     | 1 | geneontol | 0.01538462 | Up |
| CHRN2     | 1 | geneontol | 0.01538462 | Up |
| HR        | 1 | geneontol | 0.01538462 | Up |
| CACNA1S/C | 2 | geneontol | 0.03076923 | Up |
| PIM3/ADCY | 2 | geneontol | 0.03076923 | Up |
| RSAD2     | 1 | geneontol | 0.01538462 | Up |
| ITGA8     | 1 | geneontol | 0.01538462 | Up |
| LAMP3/SER | 2 | geneontol | 0.03076923 | Up |
| CHRN2/IT  | 2 | geneontol | 0.03076923 | Up |
| DVL1/LAMP | 2 | geneontol | 0.03076923 | Up |
| CHRN2     | 1 | geneontol | 0.01538462 | Up |
| IRF7      | 1 | geneontol | 0.01538462 | Up |

|           |             |            |    |
|-----------|-------------|------------|----|
| FABP3     | 1 geneontol | 0.01538462 | Up |
| LAMP3     | 1 geneontol | 0.01538462 | Up |
| ITGA8     | 1 geneontol | 0.01538462 | Up |
| DMRT3     | 1 geneontol | 0.01538462 | Up |
| PYCR3     | 1 geneontol | 0.01538462 | Up |
| FABP3     | 1 geneontol | 0.01538462 | Up |
| IL13      | 1 geneontol | 0.01538462 | Up |
| IL13      | 1 geneontol | 0.01538462 | Up |
| CHRNA2    | 1 geneontol | 0.01538462 | Up |
| TULP1     | 1 geneontol | 0.01538462 | Up |
| SMTNL2    | 1 geneontol | 0.01538462 | Up |
| IRF7/DDX6 | 2 geneontol | 0.03076923 | Up |
| TENT5C/LA | 2 geneontol | 0.03076923 | Up |
| DVL1/FBXC | 3 geneontol | 0.04615385 | Up |
| DVL1/PARF | 3 geneontol | 0.04615385 | Up |
| ITGA8     | 1 geneontol | 0.01538462 | Up |
| IL13      | 1 geneontol | 0.01538462 | Up |
| PIM3/ADCY | 2 geneontol | 0.03076923 | Up |
| CHRNA2/AK | 2 geneontol | 0.03076923 | Up |
| DVL1/THY1 | 2 geneontol | 0.03076923 | Up |
| TULP1     | 1 geneontol | 0.01538462 | Up |
| FBXO6     | 1 geneontol | 0.01538462 | Up |
| SMTNL2    | 1 geneontol | 0.01538462 | Up |
| RSAD2     | 1 geneontol | 0.01538462 | Up |
| DDX60     | 1 geneontol | 0.01538462 | Up |
| SERPING1  | 1 geneontol | 0.01538462 | Up |
| NME9      | 1 geneontol | 0.01538462 | Up |
| CHRNA2    | 1 geneontol | 0.01538462 | Up |
| ADCY5     | 1 geneontol | 0.01538462 | Up |
| IL13      | 1 geneontol | 0.01538462 | Up |
| LAMP3/SER | 2 geneontol | 0.03076923 | Up |
| ALX1      | 1 geneontol | 0.01538462 | Up |
| CHRNA2    | 1 geneontol | 0.01538462 | Up |
| SERPING1  | 1 geneontol | 0.01538462 | Up |
| IGFN1/PCE | 2 geneontol | 0.03076923 | Up |
| SOX1/DMRT | 2 geneontol | 0.03076923 | Up |
| RSAD2     | 1 geneontol | 0.01538462 | Up |
| THY1      | 1 geneontol | 0.01538462 | Up |
| IL13      | 1 geneontol | 0.01538462 | Up |
| CSRP3     | 1 geneontol | 0.01538462 | Up |
| SERPING1  | 1 geneontol | 0.01538462 | Up |
| CMTR1     | 1 geneontol | 0.01538462 | Up |
| PYCR3     | 1 geneontol | 0.01538462 | Up |
| ALX1      | 1 geneontol | 0.01538462 | Up |
| CHRNA2    | 1 geneontol | 0.01538462 | Up |
| IL13      | 1 geneontol | 0.01538462 | Up |
| ALX1      | 1 geneontol | 0.01538462 | Up |
| DVL1      | 1 geneontol | 0.01538462 | Up |
| NME9      | 1 geneontol | 0.01538462 | Up |
| DVL1      | 1 geneontol | 0.01538462 | Up |
| LAMP3     | 1 geneontol | 0.01538462 | Up |

|           |             |            |    |
|-----------|-------------|------------|----|
| CACNA1S   | 1 geneontol | 0.01538462 | Up |
| CHRNA2/IL | 2 geneontol | 0.03076923 | Up |
| DVL1/ETV1 | 2 geneontol | 0.03076923 | Up |
| TNFSF10   | 1 geneontol | 0.01538462 | Up |
| ADCY5     | 1 geneontol | 0.01538462 | Up |
| SMTNL2    | 1 geneontol | 0.01538462 | Up |
| IRF7      | 1 geneontol | 0.01538462 | Up |
| DVL1/ETV1 | 2 geneontol | 0.03076923 | Up |
| TNFSF10/I | 2 geneontol | 0.03076923 | Up |
| CHRNA2/IL | 2 geneontol | 0.03076923 | Up |
| ZWINT/CEF | 2 geneontol | 0.03076923 | Up |
| NME9      | 1 geneontol | 0.01538462 | Up |
| DVL1      | 1 geneontol | 0.01538462 | Up |
| LAMP3     | 1 geneontol | 0.01538462 | Up |
| CACNA1S/C | 2 geneontol | 0.03076923 | Up |
| TULP1     | 1 geneontol | 0.01538462 | Up |
| CDX4      | 1 geneontol | 0.01538462 | Up |
| FABP3     | 1 geneontol | 0.01538462 | Up |
| FABP3     | 1 geneontol | 0.01538462 | Up |
| SERPING1  | 1 geneontol | 0.01538462 | Up |
| TENT5C    | 1 geneontol | 0.01538462 | Up |
| CDX4      | 1 geneontol | 0.01538462 | Up |
| TNFSF10   | 1 geneontol | 0.01538462 | Up |
| ALX1      | 1 geneontol | 0.01538462 | Up |
| CSRP3     | 1 geneontol | 0.01538462 | Up |
| HES7      | 1 geneontol | 0.01538462 | Up |
| FABP3     | 1 geneontol | 0.01538462 | Up |
| ADCY5     | 1 geneontol | 0.01538462 | Up |
| ITGA8     | 1 geneontol | 0.01538462 | Up |
| DMRT3     | 1 geneontol | 0.01538462 | Up |
| IL13      | 1 geneontol | 0.01538462 | Up |
| CHRNA2    | 1 geneontol | 0.01538462 | Up |
| CHRNA2    | 1 geneontol | 0.01538462 | Up |
| ALX1      | 1 geneontol | 0.01538462 | Up |
| ADCY5     | 1 geneontol | 0.01538462 | Up |
| ADCY5     | 1 geneontol | 0.01538462 | Up |
| DVL1/THY1 | 2 geneontol | 0.03076923 | Up |
| IL13      | 1 geneontol | 0.01538462 | Up |
| DVL1      | 1 geneontol | 0.01538462 | Up |
| CACNA1S/C | 2 geneontol | 0.03076923 | Up |
| FBXO6     | 1 geneontol | 0.01538462 | Up |
| THY1      | 1 geneontol | 0.01538462 | Up |
| SERPING1  | 1 geneontol | 0.01538462 | Up |
| LAMP3     | 1 geneontol | 0.01538462 | Up |
| AKR1C1    | 1 geneontol | 0.01538462 | Up |
| IL13      | 1 geneontol | 0.01538462 | Up |
| FABP3     | 1 geneontol | 0.01538462 | Up |
| CHRNA2/IT | 2 geneontol | 0.03076923 | Up |
| CHRNA2    | 1 geneontol | 0.01538462 | Up |
| CEP97     | 1 geneontol | 0.01538462 | Up |
| FABP3     | 1 geneontol | 0.01538462 | Up |

|           |   |           |            |    |
|-----------|---|-----------|------------|----|
| SLC26A8   | 1 | geneontol | 0.01538462 | Up |
| SLC26A8   | 1 | geneontol | 0.01538462 | Up |
| IL13/RSAC | 2 | geneontol | 0.03076923 | Up |
| RSAD2     | 1 | geneontol | 0.01538462 | Up |
| ALX1      | 1 | geneontol | 0.01538462 | Up |
| TULP1     | 1 | geneontol | 0.01538462 | Up |
| IL13      | 1 | geneontol | 0.01538462 | Up |
| ADCY5     | 1 | geneontol | 0.01538462 | Up |
| SLC26A8   | 1 | geneontol | 0.01538462 | Up |
| SOX1      | 1 | geneontol | 0.01538462 | Up |
| SOX1      | 1 | geneontol | 0.01538462 | Up |
| NDRG1/GPR | 2 | geneontol | 0.03076923 | Up |
| SLC26A8   | 1 | geneontol | 0.01538462 | Up |
| THY1      | 1 | geneontol | 0.01538462 | Up |
| CHRN2/TH  | 2 | geneontol | 0.03076923 | Up |
| THY1      | 1 | geneontol | 0.01538462 | Up |
| ALX1      | 1 | geneontol | 0.01538462 | Up |
| CHRN2     | 1 | geneontol | 0.01538462 | Up |
| HES7      | 1 | geneontol | 0.01538462 | Up |
| FBX06     | 1 | geneontol | 0.01538462 | Up |
| CHRN2/IL  | 2 | geneontol | 0.03076923 | Up |
| CHRN2/IL  | 2 | geneontol | 0.03076923 | Up |
| PIM3/ADCY | 2 | geneontol | 0.03076923 | Up |
| FABP3     | 1 | geneontol | 0.01538462 | Up |
| FABP3     | 1 | geneontol | 0.01538462 | Up |
| IL13      | 1 | geneontol | 0.01538462 | Up |
| AKR1C1    | 1 | geneontol | 0.01538462 | Up |
| SCO2      | 1 | geneontol | 0.01538462 | Up |
| DVL1      | 1 | geneontol | 0.01538462 | Up |
| THY1      | 1 | geneontol | 0.01538462 | Up |
| CSRP3     | 1 | geneontol | 0.01538462 | Up |
| DVL1      | 1 | geneontol | 0.01538462 | Up |
| IL13      | 1 | geneontol | 0.01538462 | Up |
| THY1      | 1 | geneontol | 0.01538462 | Up |
| CHRN2/TU  | 2 | geneontol | 0.03076923 | Up |
| RSAD2     | 1 | geneontol | 0.01538462 | Up |
| RSAD2     | 1 | geneontol | 0.01538462 | Up |
| CSRP3     | 1 | geneontol | 0.01538462 | Up |
| GPR157    | 1 | geneontol | 0.01538462 | Up |
| NME9      | 1 | geneontol | 0.01538462 | Up |
| RSAD2     | 1 | geneontol | 0.01538462 | Up |
| CHRN2     | 1 | geneontol | 0.01538462 | Up |
| AKR1C1    | 1 | geneontol | 0.01538462 | Up |
| FABP3     | 1 | geneontol | 0.01538462 | Up |
| DVL1      | 1 | geneontol | 0.01538462 | Up |
| TENT5C/LA | 2 | geneontol | 0.03076923 | Up |
| PIM3/ADCY | 2 | geneontol | 0.03076923 | Up |
| RSAD2     | 1 | geneontol | 0.01538462 | Up |
| CHRN2     | 1 | geneontol | 0.01538462 | Up |
| FABP3     | 1 | geneontol | 0.01538462 | Up |
| DVL1      | 1 | geneontol | 0.01538462 | Up |

|           |   |           |            |    |
|-----------|---|-----------|------------|----|
| ITGA8     | 1 | geneontol | 0.01538462 | Up |
| RSAD2     | 1 | geneontol | 0.01538462 | Up |
| ADCY5     | 1 | geneontol | 0.01538462 | Up |
| ADCY5     | 1 | geneontol | 0.01538462 | Up |
| IL13/THY1 | 2 | geneontol | 0.03076923 | Up |
| CSRP3     | 1 | geneontol | 0.01538462 | Up |
| NDRG1     | 1 | geneontol | 0.01538462 | Up |
| NME9      | 1 | geneontol | 0.01538462 | Up |
| CHRNA2    | 1 | geneontol | 0.01538462 | Up |
| TNFSF10   | 1 | geneontol | 0.01538462 | Up |
| AKR1C1    | 1 | geneontol | 0.01538462 | Up |
| DVL1      | 1 | geneontol | 0.01538462 | Up |
| IRF7      | 1 | geneontol | 0.01538462 | Up |
| CHRNA2/IL | 2 | geneontol | 0.03076923 | Up |
| CHRNA2    | 1 | geneontol | 0.01538462 | Up |
| CSRP3     | 1 | geneontol | 0.01538462 | Up |
| CHRNA2    | 1 | geneontol | 0.01538462 | Up |
| ADCY5/CSR | 2 | geneontol | 0.03076923 | Up |
| DVL1/ALX1 | 2 | geneontol | 0.03076923 | Up |
| RSAD2     | 1 | geneontol | 0.01538462 | Up |
| FABP3     | 1 | geneontol | 0.01538462 | Up |
| ADCY5     | 1 | geneontol | 0.01538462 | Up |
| ADCY5     | 1 | geneontol | 0.01538462 | Up |
| ITGA8     | 1 | geneontol | 0.01538462 | Up |
| DVL1      | 1 | geneontol | 0.01538462 | Up |
| DVL1      | 1 | geneontol | 0.01538462 | Up |
| LHB/AKR1C | 2 | geneontol | 0.03076923 | Up |
| SLC26A8   | 1 | geneontol | 0.01538462 | Up |
| FABP3     | 1 | geneontol | 0.01538462 | Up |
| SLC26A8   | 1 | geneontol | 0.01538462 | Up |
| CSRP3     | 1 | geneontol | 0.01538462 | Up |
| AKR1C1    | 1 | geneontol | 0.01538462 | Up |
| CHRNA2/IL | 2 | geneontol | 0.03076923 | Up |
| SERPINC1  | 1 | geneontol | 0.01538462 | Up |
| CEP97     | 1 | geneontol | 0.01538462 | Up |
| SCO2      | 1 | geneontol | 0.01538462 | Up |
| SCO2      | 1 | geneontol | 0.01538462 | Up |
| IL13      | 1 | geneontol | 0.01538462 | Up |
| IL13      | 1 | geneontol | 0.01538462 | Up |
| AKR1C1    | 1 | geneontol | 0.01538462 | Up |
| CEP97     | 1 | geneontol | 0.01538462 | Up |
| AKR1C1    | 1 | geneontol | 0.01538462 | Up |
| AKR1C1    | 1 | geneontol | 0.01538462 | Up |
| TNFSF10   | 1 | geneontol | 0.01538462 | Up |
| IL13/THY1 | 2 | geneontol | 0.03076923 | Up |
| IL13      | 1 | geneontol | 0.01538462 | Up |
| SLC26A8   | 1 | geneontol | 0.01538462 | Up |
| SLC26A8   | 1 | geneontol | 0.01538462 | Up |
| AKR1C1    | 1 | geneontol | 0.01538462 | Up |
| THY1      | 1 | geneontol | 0.01538462 | Up |
| NDRG1     | 1 | geneontol | 0.01538462 | Up |

|           |             |            |    |
|-----------|-------------|------------|----|
| CHRN2     | 1 geneontol | 0.01538462 | Up |
| SLC26A8   | 1 geneontol | 0.01538462 | Up |
| IRF7      | 1 geneontol | 0.01538462 | Up |
| DVL1      | 1 geneontol | 0.01538462 | Up |
| AKR1C1    | 1 geneontol | 0.01538462 | Up |
| CSRP3     | 1 geneontol | 0.01538462 | Up |
| DVL1      | 1 geneontol | 0.01538462 | Up |
| SERPING1  | 1 geneontol | 0.01538462 | Up |
| AKR1C1    | 1 geneontol | 0.01538462 | Up |
| DVL1      | 1 geneontol | 0.01538462 | Up |
| THY1      | 1 geneontol | 0.01538462 | Up |
| TNFSF10   | 1 geneontol | 0.01538462 | Up |
| IRF7      | 1 geneontol | 0.01538462 | Up |
| NDRG1/CHR | 2 geneontol | 0.03076923 | Up |
| FAM83G/IT | 2 geneontol | 0.03076923 | Up |
| CSRP3     | 1 geneontol | 0.01538462 | Up |
| ITGA8     | 1 geneontol | 0.01538462 | Up |
| ITGA8     | 1 geneontol | 0.01538462 | Up |
| ALX1      | 1 geneontol | 0.01538462 | Up |
| IRF7      | 1 geneontol | 0.01538462 | Up |
| ALX1      | 1 geneontol | 0.01538462 | Up |
| DVL1      | 1 geneontol | 0.01538462 | Up |
| BPIFB2/FE | 2 geneontol | 0.03076923 | Up |
| SCO2      | 1 geneontol | 0.01538462 | Up |
| SERPING1  | 1 geneontol | 0.01538462 | Up |
| ITGA8     | 1 geneontol | 0.01538462 | Up |
| AKR1C1    | 1 geneontol | 0.01538462 | Up |
| ALX1      | 1 geneontol | 0.01538462 | Up |
| LAMP3/SER | 2 geneontol | 0.03076923 | Up |
| DVL1      | 1 geneontol | 0.01538462 | Up |
| CHRN2     | 1 geneontol | 0.01538462 | Up |
| DVL1/TNFS | 2 geneontol | 0.03076923 | Up |
| NDRG1/CHR | 2 geneontol | 0.03076923 | Up |
| DMRT3     | 1 geneontol | 0.01538462 | Up |
| LAMP3     | 1 geneontol | 0.01538462 | Up |
| NDRG1     | 1 geneontol | 0.01538462 | Up |
| SERPING1  | 1 geneontol | 0.01538462 | Up |
| TNFSF10   | 1 geneontol | 0.01538462 | Up |
| DVL1      | 1 geneontol | 0.01538462 | Up |
| AKR1C1    | 1 geneontol | 0.01538462 | Up |
| SIGLEC1   | 1 geneontol | 0.01538462 | Up |
| IGFN1/CAC | 5 geneontol | 0.07462687 | Up |
| IGFN1/CAC | 6 geneontol | 0.08955224 | Up |
| IGFN1/CAC | 6 geneontol | 0.08955224 | Up |
| IGFN1/CAC | 5 geneontol | 0.07462687 | Up |
| ITGA8/THY | 2 geneontol | 0.02985075 | Up |
| IGFN1/MYL | 3 geneontol | 0.04477612 | Up |
| RHBG/THY1 | 2 geneontol | 0.02985075 | Up |
| ITGA8/THY | 2 geneontol | 0.02985075 | Up |
| DVL1/TULF | 4 geneontol | 0.05970149 | Up |
| ITGA8/IFI | 3 geneontol | 0.04477612 | Up |

|            |   |           |            |    |
|------------|---|-----------|------------|----|
| DVL1/GPRI  | 3 | geneontol | 0.04477612 | Up |
| DVL1/GPRI  | 3 | geneontol | 0.04477612 | Up |
| ITGA8/IFI  | 4 | geneontol | 0.05970149 | Up |
| CHRNA1S    | 1 | geneontol | 0.01492537 | Up |
| DVL1       | 1 | geneontol | 0.01492537 | Up |
| CHRNA1S    | 1 | geneontol | 0.01492537 | Up |
| THY1       | 1 | geneontol | 0.01492537 | Up |
| ITGA8      | 1 | geneontol | 0.01492537 | Up |
| CHRNA1S    | 1 | geneontol | 0.01492537 | Up |
| KRTAP5-8/  | 3 | geneontol | 0.04477612 | Up |
| LAMP3      | 1 | geneontol | 0.01492537 | Up |
| MYL12B/IT  | 4 | geneontol | 0.05970149 | Up |
| THY1       | 1 | geneontol | 0.01492537 | Up |
| MYL12B     | 1 | geneontol | 0.01492537 | Up |
| REEP2      | 1 | geneontol | 0.01492537 | Up |
| THY1       | 1 | geneontol | 0.01492537 | Up |
| FBXO6      | 1 | geneontol | 0.01492537 | Up |
| SMTNL2     | 1 | geneontol | 0.01492537 | Up |
| CACNA1S/C  | 3 | geneontol | 0.04477612 | Up |
| TMEM190    | 1 | geneontol | 0.01492537 | Up |
| REEP2      | 1 | geneontol | 0.01492537 | Up |
| THY1       | 1 | geneontol | 0.01492537 | Up |
| CACNA1S/C  | 3 | geneontol | 0.04477612 | Up |
| ITGA8      | 1 | geneontol | 0.01492537 | Up |
| THY1       | 1 | geneontol | 0.01492537 | Up |
| CACNA1S/C  | 3 | geneontol | 0.04477612 | Up |
| SMTNL2     | 1 | geneontol | 0.01492537 | Up |
| CHRNA1S/TM | 3 | geneontol | 0.04477612 | Up |
| ITGA8      | 1 | geneontol | 0.01492537 | Up |
| RHBG/THY1  | 2 | geneontol | 0.02985075 | Up |
| SMTNL2     | 1 | geneontol | 0.01492537 | Up |
| DVL1/CHRN  | 3 | geneontol | 0.04477612 | Up |
| NME9/CMPK  | 2 | geneontol | 0.02941176 | Up |
| OAS1/OASL  | 3 | geneontol | 0.04411765 | Up |
| TENT5C/OA  | 2 | geneontol | 0.02941176 | Up |
| NME9/CMPK  | 2 | geneontol | 0.02941176 | Up |
| NME9/CMPK  | 2 | geneontol | 0.02941176 | Up |
| TMEM190/R  | 2 | geneontol | 0.02941176 | Up |
| AKR1C1/FA  | 2 | geneontol | 0.02941176 | Up |
| ADCY5      | 1 | geneontol | 0.01470588 | Up |
| CACNA1S    | 1 | geneontol | 0.01470588 | Up |
| RHBG       | 1 | geneontol | 0.01470588 | Up |
| SLC26A8    | 1 | geneontol | 0.01470588 | Up |
| AKR1C1     | 1 | geneontol | 0.01470588 | Up |
| KCNA10     | 1 | geneontol | 0.01470588 | Up |
| KCNA10     | 1 | geneontol | 0.01470588 | Up |
| AKR1C1     | 1 | geneontol | 0.01470588 | Up |
| CMTR1      | 1 | geneontol | 0.01470588 | Up |
| SIGLEC1    | 1 | geneontol | 0.01470588 | Up |
| IFIT5/DDX  | 2 | geneontol | 0.02941176 | Up |



|           |             |            |    |
|-----------|-------------|------------|----|
| TM4SF5/AK | 3 geneontol | 0.04411765 | Up |
| ADCY5     | 1 geneontol | 0.01470588 | Up |
| SLC26A8   | 1 geneontol | 0.01470588 | Up |
| MYL12B    | 1 geneontol | 0.01470588 | Up |
| HR        | 1 geneontol | 0.01470588 | Up |
| CHRN2     | 1 geneontol | 0.01470588 | Up |
| TM4SF5/AK | 3 geneontol | 0.04411765 | Up |
| KRTAP5-8  | 1 geneontol | 0.01470588 | Up |
| TENT5C    | 1 geneontol | 0.01470588 | Up |
| FABP3     | 1 geneontol | 0.01470588 | Up |
| SMTNL2    | 1 geneontol | 0.01470588 | Up |
| CHRN2     | 1 geneontol | 0.01470588 | Up |
| PARP14    | 1 geneontol | 0.01470588 | Up |
| CHRN2/KC  | 2 geneontol | 0.02941176 | Up |
| FABP3     | 1 geneontol | 0.01470588 | Up |
| SLC26A8   | 1 geneontol | 0.01470588 | Up |
| PYCR3     | 1 geneontol | 0.01470588 | Up |
| IFIT5     | 1 geneontol | 0.01470588 | Up |
| RHBG      | 1 geneontol | 0.01470588 | Up |
| TULP1/ZCC | 3 geneontol | 0.04411765 | Up |
| AKR1C1    | 1 geneontol | 0.01470588 | Up |
| SLC26A8   | 1 geneontol | 0.01470588 | Up |
| CHRN2     | 1 geneontol | 0.01470588 | Up |
| CMPK2     | 1 geneontol | 0.01470588 | Up |
| CACNA1S/C | 4 geneontol | 0.05882353 | Up |
| ADCY5     | 1 geneontol | 0.01470588 | Up |
| SCO2      | 1 geneontol | 0.01470588 | Up |
| CHRN2     | 1 geneontol | 0.01470588 | Up |
| ADCY5     | 1 geneontol | 0.01470588 | Up |
| CMTR1     | 1 geneontol | 0.01470588 | Up |
| B4GALNT4  | 1 geneontol | 0.01470588 | Up |
| PARP14    | 1 geneontol | 0.01470588 | Up |
| CRYBB3    | 1 geneontol | 0.01470588 | Up |
| TENT5C/OA | 2 geneontol | 0.02941176 | Up |
| THY1      | 1 geneontol | 0.01470588 | Up |
| IFIT5     | 1 geneontol | 0.01470588 | Up |
| AKR1C1    | 1 geneontol | 0.01470588 | Up |
| CHRN2/KC  | 2 geneontol | 0.02941176 | Up |
| CHRN2/KC  | 2 geneontol | 0.02941176 | Up |
| CACNA1S/K | 2 geneontol | 0.02941176 | Up |
| AKR1C1    | 1 geneontol | 0.01470588 | Up |
| SLC26A8   | 1 geneontol | 0.01470588 | Up |
| PYCR3     | 1 geneontol | 0.01470588 | Up |
| HR        | 1 geneontol | 0.01470588 | Up |
| NDRG1     | 1 geneontol | 0.01470588 | Up |
| SLC26A8   | 1 geneontol | 0.01470588 | Up |
| HR        | 1 geneontol | 0.01470588 | Up |
| CACNA1S/C | 4 geneontol | 0.05882353 | Up |
| KCNA10    | 1 geneontol | 0.01470588 | Up |
| IFIT5     | 1 geneontol | 0.01470588 | Up |
| CACNA1S/C | 4 geneontol | 0.05882353 | Up |

|           |   |           |            |    |
|-----------|---|-----------|------------|----|
| CHRNA1    | 1 | geneontol | 0.01470588 | Up |
| CHRNA1    | 1 | geneontol | 0.01470588 | Up |
| CHRNA1    | 1 | geneontol | 0.01470588 | Up |
| CHRNA1    | 1 | geneontol | 0.01470588 | Up |
| CHRNA1    | 1 | geneontol | 0.01470588 | Up |
| CHRNA1    | 1 | geneontol | 0.01470588 | Up |
| CHRNA1    | 1 | geneontol | 0.01470588 | Up |
| CHRNA1/C  | 3 | geneontol | 0.04411765 | Up |
| CHRNA1/C  | 3 | geneontol | 0.04411765 | Up |
| DVL1      | 1 | geneontol | 0.01470588 | Up |
| HR        | 1 | geneontol | 0.01470588 | Up |
| SLC26A8   | 1 | geneontol | 0.01470588 | Up |
| FABP3     | 1 | geneontol | 0.01470588 | Up |
| SCO2      | 1 | geneontol | 0.01470588 | Up |
| RSAD2     | 1 | geneontol | 0.01470588 | Up |
| SLC26A8   | 1 | geneontol | 0.01470588 | Up |
| CSR3P     | 1 | geneontol | 0.01470588 | Up |
| CHRNA1S   | 1 | geneontol | 0.01470588 | Up |
| AKR1C1    | 1 | geneontol | 0.01470588 | Up |
| B4GALNT4  | 1 | geneontol | 0.01470588 | Up |
| CHRNA1    | 1 | geneontol | 0.01470588 | Up |
| PARP14/HR | 2 | geneontol | 0.02941176 | Up |
| TNFSF10   | 1 | geneontol | 0.01470588 | Up |
| CHRNA1S/K | 2 | geneontol | 0.02941176 | Up |
| CHRNA1S/K | 2 | geneontol | 0.02941176 | Up |
| CHRNA1S/C | 2 | geneontol | 0.02941176 | Up |
| PARP14    | 1 | geneontol | 0.01470588 | Up |
| CHRNA1    | 1 | geneontol | 0.01470588 | Up |
| TM4SF5    | 1 | geneontol | 0.01470588 | Up |
| AKR1C1    | 1 | geneontol | 0.01470588 | Up |
| SCO2      | 1 | geneontol | 0.01470588 | Up |
| SCO2      | 1 | geneontol | 0.01470588 | Up |
| CHRNA1    | 1 | geneontol | 0.01470588 | Up |
| CHRNA1    | 1 | geneontol | 0.01470588 | Up |
| ADCY5     | 1 | geneontol | 0.01470588 | Up |
| AKR1C1    | 1 | geneontol | 0.01470588 | Up |
| CHRNA1    | 1 | geneontol | 0.01470588 | Up |
| IL13/TNFS | 2 | geneontol | 0.02941176 | Up |
| IFIT5     | 1 | geneontol | 0.01470588 | Up |
| RSAD2     | 1 | geneontol | 0.01470588 | Up |
| RSAD2     | 1 | geneontol | 0.01470588 | Up |
| CMTR1     | 1 | geneontol | 0.01470588 | Up |
| MYL12B    | 1 | geneontol | 0.01470588 | Up |
| TULP1/ZCC | 3 | geneontol | 0.04411765 | Up |
| DVL1      | 1 | geneontol | 0.01470588 | Up |
| CHRNA1    | 1 | geneontol | 0.01470588 | Up |
| SLC26A8   | 1 | geneontol | 0.01470588 | Up |
| DDX60     | 1 | geneontol | 0.01470588 | Up |
| NDRG1/REE | 2 | geneontol | 0.02941176 | Up |
| TULP1     | 1 | geneontol | 0.01470588 | Up |

|           |             |            |      |
|-----------|-------------|------------|------|
| SLC26A8   | 1 geneontol | 0.01470588 | Up   |
| IL13/TNFS | 2 geneontol | 0.02941176 | Up   |
| LHB/IL13/ | 3 geneontol | 0.04411765 | Up   |
| DVL1      | 1 geneontol | 0.01470588 | Up   |
| GPRIN1    | 1 geneontol | 0.01470588 | Up   |
| PARP14/B4 | 2 geneontol | 0.02941176 | Up   |
| LHB/IL13/ | 3 geneontol | 0.04411765 | Up   |
| SLC26A8   | 1 geneontol | 0.01470588 | Up   |
| KCNA10    | 1 geneontol | 0.01470588 | Up   |
| FBX06/RNF | 2 geneontol | 0.02941176 | Up   |
| DVL1/REEF | 2 geneontol | 0.02941176 | Up   |
| SERPING1  | 1 geneontol | 0.01470588 | Up   |
| FBX06/RNF | 2 geneontol | 0.02941176 | Up   |
| AKR1C1    | 1 geneontol | 0.01470588 | Up   |
| SLC26A8   | 1 geneontol | 0.01470588 | Up   |
| CHRN2     | 1 geneontol | 0.01470588 | Up   |
| AKR1C1    | 1 geneontol | 0.01470588 | Up   |
| HR        | 1 geneontol | 0.01470588 | Up   |
| ZWINT     | 1 geneontol | 0.01470588 | Up   |
| AKR1C1    | 1 geneontol | 0.01470588 | Up   |
| CHRN2     | 1 geneontol | 0.01470588 | Up   |
| AMFR/EDEM | 2 geneontol | 0.02898551 | Down |
| AMFR/EDEM | 2 geneontol | 0.02898551 | Down |
| AMFR/EDEM | 2 geneontol | 0.02898551 | Down |
| HNRNPL/SR | 2 geneontol | 0.02898551 | Down |
| HNRNPL/AL | 6 geneontol | 0.08695652 | Down |
| HNRNPL/AL | 6 geneontol | 0.08695652 | Down |
| HNRNPL/AL | 6 geneontol | 0.08695652 | Down |
| HNRNPL/SR | 2 geneontol | 0.02898551 | Down |
| AMFR/EDEM | 2 geneontol | 0.02898551 | Down |
| UTY/KDM5C | 2 geneontol | 0.02898551 | Down |
| UTY/KDM5C | 2 geneontol | 0.02898551 | Down |
| HNRNPL/SR | 2 geneontol | 0.02898551 | Down |
| UTY/KDM5C | 2 geneontol | 0.02898551 | Down |
| UTY/KDM5C | 2 geneontol | 0.02898551 | Down |
| OR51E1/OR | 6 geneontol | 0.08695652 | Down |
| ALYREF/CC | 2 geneontol | 0.02898551 | Down |
| PCBP1/PIK | 2 geneontol | 0.02898551 | Down |
| HNRNPL/AL | 6 geneontol | 0.08695652 | Down |
| ALYREF/CC | 2 geneontol | 0.02898551 | Down |
| CAMK2A/UN | 2 geneontol | 0.02898551 | Down |
| RAG2/IFNA | 3 geneontol | 0.04347826 | Down |
| ALYREF/SR | 4 geneontol | 0.05797101 | Down |
| PRPF39/SR | 2 geneontol | 0.02898551 | Down |
| CIB1/CAMK | 2 geneontol | 0.02898551 | Down |
| ALYREF/SR | 3 geneontol | 0.04347826 | Down |
| PRPF39/SR | 2 geneontol | 0.02898551 | Down |
| OR51E1/OR | 5 geneontol | 0.07246377 | Down |
| GRM6/GRK7 | 2 geneontol | 0.02898551 | Down |
| MAPKAPK5/ | 4 geneontol | 0.05797101 | Down |
| UTY/KDM5C | 2 geneontol | 0.02898551 | Down |

|                        |   |           |            |      |
|------------------------|---|-----------|------------|------|
| OR51E1/OR              | 5 | geneontol | 0.07246377 | Down |
| USF1/SRSF              | 3 | geneontol | 0.04347826 | Down |
| HNRNPL/SR              | 2 | geneontol | 0.02898551 | Down |
| GRM6/GRK7              | 2 | geneontol | 0.02898551 | Down |
| AMFR/EDEM              | 2 | geneontol | 0.02898551 | Down |
| MAPKAPK5/<br>USF1/FURI | 4 | geneontol | 0.05797101 | Down |
| RAG2                   | 3 | geneontol | 0.04347826 | Down |
| UNC5D                  | 1 | geneontol | 0.01449275 | Down |
| FURIN                  | 1 | geneontol | 0.01449275 | Down |
| USF1                   | 1 | geneontol | 0.01449275 | Down |
| SRSF6                  | 1 | geneontol | 0.01449275 | Down |
| SRSF6                  | 1 | geneontol | 0.01449275 | Down |
| HNRNPL                 | 1 | geneontol | 0.01449275 | Down |
| FURIN                  | 1 | geneontol | 0.01449275 | Down |
| ALYREF/SR              | 3 | geneontol | 0.04347826 | Down |
| ALYREF/SR              | 3 | geneontol | 0.04347826 | Down |
| ALYREF/SR              | 3 | geneontol | 0.04347826 | Down |
| PRPF39/SR              | 2 | geneontol | 0.02898551 | Down |
| COPG1/SNA              | 2 | geneontol | 0.02898551 | Down |
| FURIN                  | 1 | geneontol | 0.01449275 | Down |
| RANBP1                 | 1 | geneontol | 0.01449275 | Down |
| UGT1A10                | 1 | geneontol | 0.01449275 | Down |
| SEM2                   | 1 | geneontol | 0.01449275 | Down |
| SEM2                   | 1 | geneontol | 0.01449275 | Down |
| CORT/GRM6              | 2 | geneontol | 0.02898551 | Down |
| HNRNPL/SR              | 2 | geneontol | 0.02898551 | Down |
| HNRNPL/SR              | 2 | geneontol | 0.02898551 | Down |
| AMFR/SNAF              | 3 | geneontol | 0.04347826 | Down |
| ADH1C                  | 1 | geneontol | 0.01449275 | Down |
| FURIN                  | 1 | geneontol | 0.01449275 | Down |
| SLC25A21               | 1 | geneontol | 0.01449275 | Down |
| SNAPIN                 | 1 | geneontol | 0.01449275 | Down |
| FURIN                  | 1 | geneontol | 0.01449275 | Down |
| HNRNPL                 | 1 | geneontol | 0.01449275 | Down |
| HNRNPL/AM              | 4 | geneontol | 0.05797101 | Down |
| USF1/SIGL              | 2 | geneontol | 0.02898551 | Down |
| COPG1/SNA              | 4 | geneontol | 0.05797101 | Down |
| SLC25A21               | 1 | geneontol | 0.01449275 | Down |
| HSD17B2                | 1 | geneontol | 0.01449275 | Down |
| UNC5D                  | 1 | geneontol | 0.01449275 | Down |
| FURIN/HSC              | 3 | geneontol | 0.04347826 | Down |
| SEM2/TCT               | 2 | geneontol | 0.02898551 | Down |
| SEM2/TCT               | 2 | geneontol | 0.02898551 | Down |
| RAG2/IFNA              | 2 | geneontol | 0.02898551 | Down |
| RANBP1                 | 1 | geneontol | 0.01449275 | Down |
| FURIN                  | 1 | geneontol | 0.01449275 | Down |
| AMFR                   | 1 | geneontol | 0.01449275 | Down |
| SNAPIN                 | 1 | geneontol | 0.01449275 | Down |
| PIK3C2G                | 1 | geneontol | 0.01449275 | Down |
| CAMK2A                 | 1 | geneontol | 0.01449275 | Down |

|           |   |           |            |      |
|-----------|---|-----------|------------|------|
| SRSF6     | 1 | geneontol | 0.01449275 | Down |
| COPG1     | 1 | geneontol | 0.01449275 | Down |
| USF1      | 1 | geneontol | 0.01449275 | Down |
| EDEM1     | 1 | geneontol | 0.01449275 | Down |
| CIB1/IL11 | 2 | geneontol | 0.02898551 | Down |
| AMFR/EDEM | 2 | geneontol | 0.02898551 | Down |
| ALYREF/SR | 2 | geneontol | 0.02898551 | Down |
| GRM6      | 1 | geneontol | 0.01449275 | Down |
| AS3MT     | 1 | geneontol | 0.01449275 | Down |
| PTGDR     | 1 | geneontol | 0.01449275 | Down |
| RAG2      | 1 | geneontol | 0.01449275 | Down |
| FURIN     | 1 | geneontol | 0.01449275 | Down |
| RANBP1    | 1 | geneontol | 0.01449275 | Down |
| AMFR      | 1 | geneontol | 0.01449275 | Down |
| SIGLEC10  | 1 | geneontol | 0.01449275 | Down |
| GRAMD2A   | 1 | geneontol | 0.01449275 | Down |
| ALYREF/SR | 3 | geneontol | 0.04347826 | Down |
| MAPKAPK5/ | 3 | geneontol | 0.04347826 | Down |
| UGT1A10   | 1 | geneontol | 0.01449275 | Down |
| EDEM1     | 1 | geneontol | 0.01449275 | Down |
| CIB1      | 1 | geneontol | 0.01449275 | Down |
| CIB1      | 1 | geneontol | 0.01449275 | Down |
| EDEM1     | 1 | geneontol | 0.01449275 | Down |
| GRM6/CAMK | 4 | geneontol | 0.05797101 | Down |
| SNAPIN/CA | 2 | geneontol | 0.02898551 | Down |
| RANBP1/CI | 3 | geneontol | 0.04347826 | Down |
| KAT5      | 1 | geneontol | 0.01449275 | Down |
| AMFR      | 1 | geneontol | 0.01449275 | Down |
| OBP2B     | 1 | geneontol | 0.01449275 | Down |
| SEM2      | 1 | geneontol | 0.01449275 | Down |
| LRRC52    | 1 | geneontol | 0.01449275 | Down |
| MAPKAPK5  | 1 | geneontol | 0.01449275 | Down |
| IFNA17/IL | 2 | geneontol | 0.02898551 | Down |
| SEM2/TCT  | 2 | geneontol | 0.02898551 | Down |
| CORT      | 1 | geneontol | 0.01449275 | Down |
| KAT5      | 1 | geneontol | 0.01449275 | Down |
| CIB1      | 1 | geneontol | 0.01449275 | Down |
| UGT1A10   | 1 | geneontol | 0.01449275 | Down |
| SEZ6L     | 1 | geneontol | 0.01449275 | Down |
| ALYREF/SR | 2 | geneontol | 0.02898551 | Down |
| HNRNPL/SR | 2 | geneontol | 0.02898551 | Down |
| ALYREF/SR | 2 | geneontol | 0.02898551 | Down |
| GRM6/CAMK | 3 | geneontol | 0.04347826 | Down |
| CAMK2A    | 1 | geneontol | 0.01449275 | Down |
| CAMK2A    | 1 | geneontol | 0.01449275 | Down |
| SRSF6     | 1 | geneontol | 0.01449275 | Down |
| SNAPIN    | 1 | geneontol | 0.01449275 | Down |
| GRM6      | 1 | geneontol | 0.01449275 | Down |
| GRM6      | 1 | geneontol | 0.01449275 | Down |
| SNAPIN    | 1 | geneontol | 0.01449275 | Down |
| SNAPIN    | 1 | geneontol | 0.01449275 | Down |

|           |   |           |            |      |
|-----------|---|-----------|------------|------|
| AS3MT/UGT | 2 | geneontol | 0.02898551 | Down |
| CACNA2D3/ | 4 | geneontol | 0.05797101 | Down |
| SNAPIN    | 1 | geneontol | 0.01449275 | Down |
| IFNA17    | 1 | geneontol | 0.01449275 | Down |
| FURIN     | 1 | geneontol | 0.01449275 | Down |
| SNAPIN/CA | 2 | geneontol | 0.02898551 | Down |
| CORT/GRM6 | 3 | geneontol | 0.04347826 | Down |
| SEMG2/TCT | 2 | geneontol | 0.02898551 | Down |
| GRM6/CAMK | 2 | geneontol | 0.02898551 | Down |
| SEMG2/TCT | 2 | geneontol | 0.02898551 | Down |
| GRAMD2A   | 1 | geneontol | 0.01449275 | Down |
| CIB1      | 1 | geneontol | 0.01449275 | Down |
| CIB1      | 1 | geneontol | 0.01449275 | Down |
| MCAM      | 1 | geneontol | 0.01449275 | Down |
| GRM6      | 1 | geneontol | 0.01449275 | Down |
| AS3MT/UGT | 2 | geneontol | 0.02898551 | Down |
| AMFR/EDEM | 2 | geneontol | 0.02898551 | Down |
| ADH1C     | 1 | geneontol | 0.01449275 | Down |
| CIB1      | 1 | geneontol | 0.01449275 | Down |
| PTGDR     | 1 | geneontol | 0.01449275 | Down |
| ALYREF/KA | 3 | geneontol | 0.04347826 | Down |
| PCBP1/PIK | 2 | geneontol | 0.02898551 | Down |
| UGT1A10   | 1 | geneontol | 0.01449275 | Down |
| SNAPIN    | 1 | geneontol | 0.01449275 | Down |
| SLC25A21  | 1 | geneontol | 0.01449275 | Down |
| UGT1A10   | 1 | geneontol | 0.01449275 | Down |
| SNAPIN    | 1 | geneontol | 0.01449275 | Down |
| KAT5      | 1 | geneontol | 0.01449275 | Down |
| FURIN     | 1 | geneontol | 0.01449275 | Down |
| IFNA17    | 1 | geneontol | 0.01449275 | Down |
| FURIN     | 1 | geneontol | 0.01449275 | Down |
| USF1/KAT5 | 4 | geneontol | 0.05797101 | Down |
| AS3MT/UGT | 2 | geneontol | 0.02898551 | Down |
| ALYREF/SR | 2 | geneontol | 0.02898551 | Down |
| ALYREF/SR | 2 | geneontol | 0.02898551 | Down |
| MCAM      | 1 | geneontol | 0.01449275 | Down |
| FURIN     | 1 | geneontol | 0.01449275 | Down |
| SNAPIN    | 1 | geneontol | 0.01449275 | Down |
| FURIN     | 1 | geneontol | 0.01449275 | Down |
| SEMG2     | 1 | geneontol | 0.01449275 | Down |
| SNAPIN    | 1 | geneontol | 0.01449275 | Down |
| SEMG2     | 1 | geneontol | 0.01449275 | Down |
| GRM6/CAMK | 3 | geneontol | 0.04347826 | Down |
| HSD17B2/A | 2 | geneontol | 0.02898551 | Down |
| KAT5      | 1 | geneontol | 0.01449275 | Down |
| PTGDR     | 1 | geneontol | 0.01449275 | Down |
| CORT      | 1 | geneontol | 0.01449275 | Down |
| MCAM      | 1 | geneontol | 0.01449275 | Down |
| CAMK2A    | 1 | geneontol | 0.01449275 | Down |
| SNAPIN/SE | 3 | geneontol | 0.04347826 | Down |
| ALYREF/SR | 3 | geneontol | 0.04347826 | Down |

|                        |   |           |            |      |
|------------------------|---|-----------|------------|------|
| USF1                   | 1 | geneontol | 0.01449275 | Down |
| SEZ6L                  | 1 | geneontol | 0.01449275 | Down |
| KDM5D                  | 1 | geneontol | 0.01449275 | Down |
| LRRC52                 | 1 | geneontol | 0.01449275 | Down |
| MAPKAPK5               | 1 | geneontol | 0.01449275 | Down |
| CACNA2D3/<br>GRM6/GRK7 | 4 | geneontol | 0.05797101 | Down |
| EDEM1                  | 2 | geneontol | 0.02898551 | Down |
| EDEM1                  | 1 | geneontol | 0.01449275 | Down |
| CIB1                   | 1 | geneontol | 0.01449275 | Down |
| GRK7                   | 1 | geneontol | 0.01449275 | Down |
| SNAPIN                 | 1 | geneontol | 0.01449275 | Down |
| ALYREF                 | 1 | geneontol | 0.01449275 | Down |
| IFNA17                 | 1 | geneontol | 0.01449275 | Down |
| TOMM22/CA              | 2 | geneontol | 0.02898551 | Down |
| ALYREF/CC              | 3 | geneontol | 0.04347826 | Down |
| ALYREF/SR              | 2 | geneontol | 0.02898551 | Down |
| GRM6/GRK7              | 2 | geneontol | 0.02898551 | Down |
| PRPF39                 | 1 | geneontol | 0.01449275 | Down |
| RAG2                   | 1 | geneontol | 0.01449275 | Down |
| SLC25A21               | 1 | geneontol | 0.01449275 | Down |
| SEZ6L                  | 1 | geneontol | 0.01449275 | Down |
| USF1                   | 1 | geneontol | 0.01449275 | Down |
| FURIN                  | 1 | geneontol | 0.01449275 | Down |
| SNAPIN                 | 1 | geneontol | 0.01449275 | Down |
| USF1                   | 1 | geneontol | 0.01449275 | Down |
| CAMK2A                 | 1 | geneontol | 0.01449275 | Down |
| CACNA2D3/<br>IFNA17/IL | 4 | geneontol | 0.05797101 | Down |
| AMFR/EDEM              | 2 | geneontol | 0.02898551 | Down |
| EDEM1                  | 1 | geneontol | 0.01449275 | Down |
| SEMG2                  | 1 | geneontol | 0.01449275 | Down |
| USF1                   | 1 | geneontol | 0.01449275 | Down |
| EDEM1                  | 1 | geneontol | 0.01449275 | Down |
| EDEM1                  | 1 | geneontol | 0.01449275 | Down |
| CAMK2A/GR              | 2 | geneontol | 0.02898551 | Down |
| GRK7                   | 1 | geneontol | 0.01449275 | Down |
| STT3A                  | 1 | geneontol | 0.01449275 | Down |
| MCAM                   | 1 | geneontol | 0.01449275 | Down |
| CIB1                   | 1 | geneontol | 0.01449275 | Down |
| KAT5                   | 1 | geneontol | 0.01449275 | Down |
| XRN2/GRM6              | 2 | geneontol | 0.02898551 | Down |
| ALYREF/CC              | 2 | geneontol | 0.02898551 | Down |
| USF1/SRSF              | 2 | geneontol | 0.02898551 | Down |
| HNRNPL/SR              | 2 | geneontol | 0.02898551 | Down |
| IFNA17                 | 1 | geneontol | 0.01449275 | Down |
| STT3A                  | 1 | geneontol | 0.01449275 | Down |
| CIB1                   | 1 | geneontol | 0.01449275 | Down |
| EDEM1                  | 1 | geneontol | 0.01449275 | Down |
| ALYREF/SR              | 2 | geneontol | 0.02898551 | Down |
| SNAPIN/CI              | 2 | geneontol | 0.02898551 | Down |
| HSD17B2                | 1 | geneontol | 0.01449275 | Down |

|           |   |           |            |      |
|-----------|---|-----------|------------|------|
| PTGDR     | 1 | geneontol | 0.01449275 | Down |
| SLC25A21  | 1 | geneontol | 0.01449275 | Down |
| SEZ6L     | 1 | geneontol | 0.01449275 | Down |
| SEMG2/TCT | 2 | geneontol | 0.02898551 | Down |
| HNRNPL/SR | 2 | geneontol | 0.02898551 | Down |
| USF1/GRM6 | 3 | geneontol | 0.04347826 | Down |
| SEMG2     | 1 | geneontol | 0.01449275 | Down |
| SLC25A21  | 1 | geneontol | 0.01449275 | Down |
| ADH1C     | 1 | geneontol | 0.01449275 | Down |
| CIB1/CAMK | 2 | geneontol | 0.02898551 | Down |
| CIB1/SEMG | 2 | geneontol | 0.02898551 | Down |
| COPG1     | 1 | geneontol | 0.01449275 | Down |
| SLC25A21  | 1 | geneontol | 0.01449275 | Down |
| PTGDR     | 1 | geneontol | 0.01449275 | Down |
| MAPKAPK5  | 1 | geneontol | 0.01449275 | Down |
| OR10H2    | 1 | geneontol | 0.01449275 | Down |
| COPG1/SNA | 2 | geneontol | 0.02898551 | Down |
| RAG2/IFNA | 3 | geneontol | 0.04347826 | Down |
| GRK7      | 1 | geneontol | 0.01449275 | Down |
| FURIN     | 1 | geneontol | 0.01449275 | Down |
| FURIN     | 1 | geneontol | 0.01449275 | Down |
| OLFM3     | 1 | geneontol | 0.01449275 | Down |
| CIB1      | 1 | geneontol | 0.01449275 | Down |
| FURIN     | 1 | geneontol | 0.01449275 | Down |
| CAMK2A/UN | 2 | geneontol | 0.02898551 | Down |
| AMFR/EDEM | 2 | geneontol | 0.02898551 | Down |
| CIB1/SEMG | 2 | geneontol | 0.02898551 | Down |
| MAPKAPK5  | 1 | geneontol | 0.01449275 | Down |
| FURIN     | 1 | geneontol | 0.01449275 | Down |
| CIB1      | 1 | geneontol | 0.01449275 | Down |
| CIB1      | 1 | geneontol | 0.01449275 | Down |
| SRSF6     | 1 | geneontol | 0.01449275 | Down |
| CIB1      | 1 | geneontol | 0.01449275 | Down |
| MAPKAPK5  | 1 | geneontol | 0.01449275 | Down |
| CIB1/SEMG | 2 | geneontol | 0.02898551 | Down |
| FURIN/PCE | 3 | geneontol | 0.04347826 | Down |
| TOMM22/RF | 3 | geneontol | 0.04347826 | Down |
| SLC25A21  | 1 | geneontol | 0.01449275 | Down |
| CAMK2A    | 1 | geneontol | 0.01449275 | Down |
| CAMK2A    | 1 | geneontol | 0.01449275 | Down |
| KAT5      | 1 | geneontol | 0.01449275 | Down |
| FURIN     | 1 | geneontol | 0.01449275 | Down |
| CIB1      | 1 | geneontol | 0.01449275 | Down |
| EDEM1     | 1 | geneontol | 0.01449275 | Down |
| HNRNPL/AM | 2 | geneontol | 0.02898551 | Down |
| FURIN     | 1 | geneontol | 0.01449275 | Down |
| OR10H2    | 1 | geneontol | 0.01449275 | Down |
| MROH2B    | 1 | geneontol | 0.01449275 | Down |
| SRSF6     | 1 | geneontol | 0.01449275 | Down |
| CIB1      | 1 | geneontol | 0.01449275 | Down |
| SNAPIN/CA | 2 | geneontol | 0.02898551 | Down |



|           |   |           |            |      |
|-----------|---|-----------|------------|------|
| SNAPIN/CA | 2 | geneontol | 0.02898551 | Down |
| USF1/SEMG | 3 | geneontol | 0.04347826 | Down |
| CIB1      | 1 | geneontol | 0.01449275 | Down |
| SNAPIN    | 1 | geneontol | 0.01449275 | Down |
| LRR52     | 1 | geneontol | 0.01449275 | Down |
| USF1/RPS4 | 2 | geneontol | 0.02898551 | Down |
| MAPKAPK5/ | 2 | geneontol | 0.02898551 | Down |
| FURIN     | 1 | geneontol | 0.01449275 | Down |
| GRM6      | 1 | geneontol | 0.01449275 | Down |
| EDEM1/CIE | 2 | geneontol | 0.02898551 | Down |
| AMFR/EDEM | 2 | geneontol | 0.02898551 | Down |
| ALYREF/SR | 2 | geneontol | 0.02898551 | Down |
| XRN2      | 1 | geneontol | 0.01449275 | Down |
| KDM5D     | 1 | geneontol | 0.01449275 | Down |
| CIB1      | 1 | geneontol | 0.01449275 | Down |
| USF1      | 1 | geneontol | 0.01449275 | Down |
| CIB1      | 1 | geneontol | 0.01449275 | Down |
| SNAPIN    | 1 | geneontol | 0.01449275 | Down |
| XRN2      | 1 | geneontol | 0.01449275 | Down |
| KAT5      | 1 | geneontol | 0.01449275 | Down |
| SNAPIN/CI | 2 | geneontol | 0.02898551 | Down |
| RAG2/IFNA | 3 | geneontol | 0.04347826 | Down |
| HNRNPL    | 1 | geneontol | 0.01449275 | Down |
| SRSF6     | 1 | geneontol | 0.01449275 | Down |
| TOMM22    | 1 | geneontol | 0.01449275 | Down |
| RANBP1/CI | 2 | geneontol | 0.02898551 | Down |
| COPG1/SNA | 2 | geneontol | 0.02898551 | Down |
| FURIN/EDE | 3 | geneontol | 0.04347826 | Down |
| OLFM3     | 1 | geneontol | 0.01449275 | Down |
| CIB1      | 1 | geneontol | 0.01449275 | Down |
| MAPKAPK5  | 1 | geneontol | 0.01449275 | Down |
| IFNA17    | 1 | geneontol | 0.01449275 | Down |
| RPS4Y1/EI | 2 | geneontol | 0.02898551 | Down |
| FURIN     | 1 | geneontol | 0.01449275 | Down |
| ADH1C     | 1 | geneontol | 0.01449275 | Down |
| LRR52     | 1 | geneontol | 0.01449275 | Down |
| SNAPIN    | 1 | geneontol | 0.01449275 | Down |
| ALYREF    | 1 | geneontol | 0.01449275 | Down |
| CIB1      | 1 | geneontol | 0.01449275 | Down |
| OLFM3     | 1 | geneontol | 0.01449275 | Down |
| MAPKAPK5  | 1 | geneontol | 0.01449275 | Down |
| SEMG2     | 1 | geneontol | 0.01449275 | Down |
| SRSF6     | 1 | geneontol | 0.01449275 | Down |
| HNRNPL    | 1 | geneontol | 0.01449275 | Down |
| SEZ6L/GRM | 2 | geneontol | 0.02898551 | Down |
| EDEM1     | 1 | geneontol | 0.01449275 | Down |
| KAT5      | 1 | geneontol | 0.01449275 | Down |
| SNAPIN    | 1 | geneontol | 0.01449275 | Down |
| TOMM22    | 1 | geneontol | 0.01449275 | Down |
| CIB1      | 1 | geneontol | 0.01449275 | Down |
| HSD17B2   | 1 | geneontol | 0.01449275 | Down |

|           |   |           |            |      |
|-----------|---|-----------|------------|------|
| CIB1      | 1 | geneontol | 0.01449275 | Down |
| XRN2/GRM6 | 3 | geneontol | 0.04347826 | Down |
| COPG1/SNA | 2 | geneontol | 0.02898551 | Down |
| SLC25A21  | 1 | geneontol | 0.01449275 | Down |
| SEZ6L     | 1 | geneontol | 0.01449275 | Down |
| USF1      | 1 | geneontol | 0.01449275 | Down |
| SRSF6     | 1 | geneontol | 0.01449275 | Down |
| XRN2/GRM6 | 3 | geneontol | 0.04347826 | Down |
| AMFR      | 1 | geneontol | 0.01449275 | Down |
| MAPKAPK5  | 1 | geneontol | 0.01449275 | Down |
| USF1      | 1 | geneontol | 0.01449275 | Down |
| FURIN/KAT | 3 | geneontol | 0.04347826 | Down |
| ALYREF/SR | 2 | geneontol | 0.02898551 | Down |
| AMFR/EDEM | 2 | geneontol | 0.02898551 | Down |
| MEST      | 1 | geneontol | 0.01449275 | Down |
| SNAPIN    | 1 | geneontol | 0.01449275 | Down |
| SRSF6     | 1 | geneontol | 0.01449275 | Down |
| CIB1      | 1 | geneontol | 0.01449275 | Down |
| XRN2/GRM6 | 3 | geneontol | 0.04347826 | Down |
| SNAPIN    | 1 | geneontol | 0.01449275 | Down |
| MAPKAPK5  | 1 | geneontol | 0.01449275 | Down |
| IFNA17    | 1 | geneontol | 0.01449275 | Down |
| CAMK2A    | 1 | geneontol | 0.01449275 | Down |
| SNAPIN    | 1 | geneontol | 0.01449275 | Down |
| CIB1      | 1 | geneontol | 0.01449275 | Down |
| XRN2/RPS4 | 2 | geneontol | 0.02898551 | Down |
| RPS4Y1/CI | 2 | geneontol | 0.02898551 | Down |
| SRSF6     | 1 | geneontol | 0.01449275 | Down |
| KAT5      | 1 | geneontol | 0.01449275 | Down |
| CIB1      | 1 | geneontol | 0.01449275 | Down |
| CORT      | 1 | geneontol | 0.01449275 | Down |
| MAPKAPK5  | 1 | geneontol | 0.01449275 | Down |
| USF1      | 1 | geneontol | 0.01449275 | Down |
| SNAPIN    | 1 | geneontol | 0.01449275 | Down |
| CAMK2A    | 1 | geneontol | 0.01449275 | Down |
| CORT      | 1 | geneontol | 0.01449275 | Down |
| AS3MT     | 1 | geneontol | 0.01449275 | Down |
| RANBP1    | 1 | geneontol | 0.01449275 | Down |
| PIK3C2G   | 1 | geneontol | 0.01449275 | Down |
| CIB1      | 1 | geneontol | 0.01449275 | Down |
| AMFR      | 1 | geneontol | 0.01449275 | Down |
| PTGDR     | 1 | geneontol | 0.01449275 | Down |
| SNAPIN    | 1 | geneontol | 0.01449275 | Down |
| GRM6/GRK7 | 2 | geneontol | 0.02898551 | Down |
| CAMK2A    | 1 | geneontol | 0.01449275 | Down |
| FURIN     | 1 | geneontol | 0.01449275 | Down |
| SNAPIN    | 1 | geneontol | 0.01449275 | Down |
| PTGDR     | 1 | geneontol | 0.01449275 | Down |
| HNRNPL/US | 2 | geneontol | 0.02898551 | Down |
| AMFR/STT3 | 3 | geneontol | 0.04347826 | Down |
| CAMK2A    | 1 | geneontol | 0.01449275 | Down |

|           |   |           |            |      |
|-----------|---|-----------|------------|------|
| SEMG2     | 1 | geneontol | 0.01449275 | Down |
| RANBP1    | 1 | geneontol | 0.01449275 | Down |
| SNAPIN    | 1 | geneontol | 0.01449275 | Down |
| EDEM1/CIE | 2 | geneontol | 0.02898551 | Down |
| GRM6/GRK7 | 2 | geneontol | 0.02898551 | Down |
| GRK7      | 1 | geneontol | 0.01449275 | Down |
| TOMM22    | 1 | geneontol | 0.01449275 | Down |
| SEMG2     | 1 | geneontol | 0.01449275 | Down |
| SNAPIN/CI | 2 | geneontol | 0.02898551 | Down |
| FURIN/EDE | 2 | geneontol | 0.02898551 | Down |
| CAMK2A    | 1 | geneontol | 0.01449275 | Down |
| FURIN     | 1 | geneontol | 0.01449275 | Down |
| PTGDR     | 1 | geneontol | 0.01449275 | Down |
| IL11      | 1 | geneontol | 0.01449275 | Down |
| USF1      | 1 | geneontol | 0.01449275 | Down |
| CIB1      | 1 | geneontol | 0.01449275 | Down |
| MAPKAPK5  | 1 | geneontol | 0.01449275 | Down |
| AMFR/KAT5 | 3 | geneontol | 0.04347826 | Down |
| SNAPIN/CA | 2 | geneontol | 0.02898551 | Down |
| CIB1      | 1 | geneontol | 0.01449275 | Down |
| OLFM3     | 1 | geneontol | 0.01449275 | Down |
| RAG2      | 1 | geneontol | 0.01449275 | Down |
| AMFR/EDEM | 2 | geneontol | 0.02739726 | Down |
| MROH2B/FL | 3 | geneontol | 0.04109589 | Down |
| XRN2/EDEM | 2 | geneontol | 0.02739726 | Down |
| MROH2B/FL | 3 | geneontol | 0.04109589 | Down |
| AMFR/FURI | 5 | geneontol | 0.06849315 | Down |
| AMFR/EDEM | 3 | geneontol | 0.04109589 | Down |
| UTY/KDM5C | 2 | geneontol | 0.02739726 | Down |
| XRN2/EDEM | 2 | geneontol | 0.02739726 | Down |
| AMFR/CIB1 | 3 | geneontol | 0.04109589 | Down |
| ALYREF/PR | 3 | geneontol | 0.04109589 | Down |
| MROH2B/FL | 3 | geneontol | 0.04109589 | Down |
| ALYREF/SN | 2 | geneontol | 0.02739726 | Down |
| KAT5      | 1 | geneontol | 0.01369863 | Down |
| PRPF39/SN | 2 | geneontol | 0.02739726 | Down |
| STT3A     | 1 | geneontol | 0.01369863 | Down |
| COPG1     | 1 | geneontol | 0.01369863 | Down |
| UTY       | 1 | geneontol | 0.01369863 | Down |
| AMFR/FURI | 4 | geneontol | 0.05479452 | Down |
| CACNA2D3/ | 3 | geneontol | 0.04109589 | Down |
| PRPF39/SN | 2 | geneontol | 0.02739726 | Down |
| ALYREF    | 1 | geneontol | 0.01369863 | Down |
| CTSW      | 1 | geneontol | 0.01369863 | Down |
| CORT      | 1 | geneontol | 0.01369863 | Down |
| SNAPIN    | 1 | geneontol | 0.01369863 | Down |
| PRPF39/SN | 2 | geneontol | 0.02739726 | Down |
| SNAPIN/SY | 2 | geneontol | 0.02739726 | Down |
| SNAPIN/SY | 2 | geneontol | 0.02739726 | Down |
| HNRNPL    | 1 | geneontol | 0.01369863 | Down |
| UTY/KDM5C | 2 | geneontol | 0.02739726 | Down |

|           |   |           |            |      |
|-----------|---|-----------|------------|------|
| PRPF39    | 1 | geneontol | 0.01369863 | Down |
| PRPF39    | 1 | geneontol | 0.01369863 | Down |
| HNRNPL/DC | 3 | geneontol | 0.04109589 | Down |
| ALYREF/SR | 4 | geneontol | 0.05479452 | Down |
| COPG1     | 1 | geneontol | 0.01369863 | Down |
| CIB1      | 1 | geneontol | 0.01369863 | Down |
| COPG1/FUR | 4 | geneontol | 0.05479452 | Down |
| PRPF39/SN | 2 | geneontol | 0.02739726 | Down |
| SNAPIN    | 1 | geneontol | 0.01369863 | Down |
| ALYREF    | 1 | geneontol | 0.01369863 | Down |
| DDX3Y     | 1 | geneontol | 0.01369863 | Down |
| DDX3Y     | 1 | geneontol | 0.01369863 | Down |
| KAT5      | 1 | geneontol | 0.01369863 | Down |
| CTSW      | 1 | geneontol | 0.01369863 | Down |
| KAT5      | 1 | geneontol | 0.01369863 | Down |
| DDX3Y     | 1 | geneontol | 0.01369863 | Down |
| SNRNP40   | 1 | geneontol | 0.01369863 | Down |
| GRK7      | 1 | geneontol | 0.01369863 | Down |
| TOMM22    | 1 | geneontol | 0.01369863 | Down |
| KAT5      | 1 | geneontol | 0.01369863 | Down |
| OLFM3     | 1 | geneontol | 0.01369863 | Down |
| GRAMD2A   | 1 | geneontol | 0.01369863 | Down |
| COPG1     | 1 | geneontol | 0.01369863 | Down |
| CACNA2D3/ | 3 | geneontol | 0.04109589 | Down |
| PIK3C2G   | 1 | geneontol | 0.01369863 | Down |
| MROH2B    | 1 | geneontol | 0.01369863 | Down |
| SNRNP40   | 1 | geneontol | 0.01369863 | Down |
| SNRNP40   | 1 | geneontol | 0.01369863 | Down |
| FURIN     | 1 | geneontol | 0.01369863 | Down |
| AMFR/EDEM | 2 | geneontol | 0.02739726 | Down |
| CACNA2D3/ | 3 | geneontol | 0.04109589 | Down |
| SYNPR     | 1 | geneontol | 0.01369863 | Down |
| CACNA2D3/ | 3 | geneontol | 0.04109589 | Down |
| PRPF39    | 1 | geneontol | 0.01369863 | Down |
| COPG1/FUR | 2 | geneontol | 0.02739726 | Down |
| CACNA2D3  | 1 | geneontol | 0.01369863 | Down |
| AMFR/CIB1 | 2 | geneontol | 0.02739726 | Down |
| KAT5      | 1 | geneontol | 0.01369863 | Down |
| FURIN/MLA | 3 | geneontol | 0.04109589 | Down |
| RPS4Y1    | 1 | geneontol | 0.01369863 | Down |
| SYNPR     | 1 | geneontol | 0.01369863 | Down |
| OLFM3     | 1 | geneontol | 0.01369863 | Down |
| OLFM3     | 1 | geneontol | 0.01369863 | Down |
| SNAPIN/SY | 2 | geneontol | 0.02739726 | Down |
| FURIN/MLA | 3 | geneontol | 0.04109589 | Down |
| SNAPIN/SY | 2 | geneontol | 0.02739726 | Down |
| COPG1     | 1 | geneontol | 0.01369863 | Down |
| SNAPIN    | 1 | geneontol | 0.01369863 | Down |
| SNAPIN/SY | 2 | geneontol | 0.02739726 | Down |
| FURIN     | 1 | geneontol | 0.01369863 | Down |
| DDX3Y/PCE | 2 | geneontol | 0.02739726 | Down |

|           |   |           |            |      |
|-----------|---|-----------|------------|------|
| FURIN     | 1 | geneontol | 0.01369863 | Down |
| CACNA2D3  | 1 | geneontol | 0.01369863 | Down |
| XIRP1     | 1 | geneontol | 0.01369863 | Down |
| XIRP1     | 1 | geneontol | 0.01369863 | Down |
| RPS4Y1    | 1 | geneontol | 0.01369863 | Down |
| FURIN/MLA | 2 | geneontol | 0.02739726 | Down |
| RPS4Y1    | 1 | geneontol | 0.01369863 | Down |
| KAT5      | 1 | geneontol | 0.01369863 | Down |
| XIRP1     | 1 | geneontol | 0.01369863 | Down |
| KAT5      | 1 | geneontol | 0.01369863 | Down |
| KAT5      | 1 | geneontol | 0.01369863 | Down |
| XIRP1     | 1 | geneontol | 0.01369863 | Down |
| MAPKAPK5/ | 2 | geneontol | 0.02739726 | Down |
| MAPKAPK5/ | 2 | geneontol | 0.02739726 | Down |
| MAPKAPK5/ | 2 | geneontol | 0.02739726 | Down |
| UTY/KDM5C | 2 | geneontol | 0.02739726 | Down |
| UTY/KDM5C | 2 | geneontol | 0.02739726 | Down |
| UTY/KDM5C | 2 | geneontol | 0.02739726 | Down |
| AMFR/FURI | 3 | geneontol | 0.04109589 | Down |
| OR51E1/OR | 5 | geneontol | 0.06849315 | Down |
| HNRNPL/SR | 2 | geneontol | 0.02739726 | Down |
| PTGDR     | 1 | geneontol | 0.01369863 | Down |
| EDEM1     | 1 | geneontol | 0.01369863 | Down |
| PIK3C2G   | 1 | geneontol | 0.01369863 | Down |
| ADH1C     | 1 | geneontol | 0.01369863 | Down |
| RAG2/GRAM | 2 | geneontol | 0.02739726 | Down |
| PTGDR     | 1 | geneontol | 0.01369863 | Down |
| STT3A/UGT | 3 | geneontol | 0.04109589 | Down |
| HSD17B2   | 1 | geneontol | 0.01369863 | Down |
| PIK3C2G   | 1 | geneontol | 0.01369863 | Down |
| HNRNPL    | 1 | geneontol | 0.01369863 | Down |
| AMFR      | 1 | geneontol | 0.01369863 | Down |
| UTY/KDM5C | 2 | geneontol | 0.02739726 | Down |
| EDEM1     | 1 | geneontol | 0.01369863 | Down |
| PTGDR     | 1 | geneontol | 0.01369863 | Down |
| PCBP1     | 1 | geneontol | 0.01369863 | Down |
| RANBP1    | 1 | geneontol | 0.01369863 | Down |
| EDEM1     | 1 | geneontol | 0.01369863 | Down |
| PIK3C2G   | 1 | geneontol | 0.01369863 | Down |
| PIK3C2G   | 1 | geneontol | 0.01369863 | Down |
| OBP2B/OR5 | 2 | geneontol | 0.02739726 | Down |
| IFNA17    | 1 | geneontol | 0.01369863 | Down |
| MAPKAPK5  | 1 | geneontol | 0.01369863 | Down |
| XRN2      | 1 | geneontol | 0.01369863 | Down |
| ADH1C     | 1 | geneontol | 0.01369863 | Down |
| TOMM22    | 1 | geneontol | 0.01369863 | Down |
| TOMM22    | 1 | geneontol | 0.01369863 | Down |
| AMFR      | 1 | geneontol | 0.01369863 | Down |
| SNAPIN/SY | 2 | geneontol | 0.02739726 | Down |
| GPX8      | 1 | geneontol | 0.01369863 | Down |
| CIB1      | 1 | geneontol | 0.01369863 | Down |

|           |   |           |            |      |
|-----------|---|-----------|------------|------|
| RAG2/GRAM | 2 | geneontol | 0.02739726 | Down |
| HSD17B2/A | 2 | geneontol | 0.02739726 | Down |
| TOMM22    | 1 | geneontol | 0.01369863 | Down |
| SIGLEC10  | 1 | geneontol | 0.01369863 | Down |
| CORT/C1QT | 2 | geneontol | 0.02739726 | Down |
| RAG2/GRAM | 3 | geneontol | 0.04109589 | Down |
| B4GALNT3  | 1 | geneontol | 0.01369863 | Down |
| HSD17B2/A | 2 | geneontol | 0.02739726 | Down |
| STT3A/UGT | 3 | geneontol | 0.04109589 | Down |
| CIB1/LRRC | 2 | geneontol | 0.02739726 | Down |
| SLC25A21  | 1 | geneontol | 0.01369863 | Down |
| SYNPR     | 1 | geneontol | 0.01369863 | Down |
| GRM6      | 1 | geneontol | 0.01369863 | Down |
| EDEM1     | 1 | geneontol | 0.01369863 | Down |
| KDM5D     | 1 | geneontol | 0.01369863 | Down |
| RAG2      | 1 | geneontol | 0.01369863 | Down |
| CACNA2D3/ | 2 | geneontol | 0.02739726 | Down |
| USF1      | 1 | geneontol | 0.01369863 | Down |
| UGT1A10/E | 2 | geneontol | 0.02739726 | Down |
| SLC25A21  | 1 | geneontol | 0.01369863 | Down |
| CORT      | 1 | geneontol | 0.01369863 | Down |
| SLC25A21  | 1 | geneontol | 0.01369863 | Down |
| HSD17B2   | 1 | geneontol | 0.01369863 | Down |
| RAG2      | 1 | geneontol | 0.01369863 | Down |
| SLC25A21  | 1 | geneontol | 0.01369863 | Down |
| CIB1      | 1 | geneontol | 0.01369863 | Down |
| TOMM22    | 1 | geneontol | 0.01369863 | Down |
| UGT1A10   | 1 | geneontol | 0.01369863 | Down |
| SLC25A21  | 1 | geneontol | 0.01369863 | Down |
| MAPKAPK5  | 1 | geneontol | 0.01369863 | Down |
| OR10H2    | 1 | geneontol | 0.01369863 | Down |
| HSD17B2   | 1 | geneontol | 0.01369863 | Down |
| OR10H2    | 1 | geneontol | 0.01369863 | Down |
| CORT/IFNA | 4 | geneontol | 0.05479452 | Down |
| CORT/IFNA | 4 | geneontol | 0.05479452 | Down |
| XRN2      | 1 | geneontol | 0.01369863 | Down |
| SLC25A21  | 1 | geneontol | 0.01369863 | Down |
| XRN2      | 1 | geneontol | 0.01369863 | Down |
| SLC25A21  | 1 | geneontol | 0.01369863 | Down |
| RAG2      | 1 | geneontol | 0.01369863 | Down |
| XRN2      | 1 | geneontol | 0.01369863 | Down |
| RANBP1    | 1 | geneontol | 0.01369863 | Down |
| SIGLEC10  | 1 | geneontol | 0.01369863 | Down |
| RAG2/GRAM | 2 | geneontol | 0.02739726 | Down |
| USF1/KAT5 | 3 | geneontol | 0.04109589 | Down |
| CACNA2D3  | 1 | geneontol | 0.01369863 | Down |
| MAPKAPK5  | 1 | geneontol | 0.01369863 | Down |
| CAMK2A    | 1 | geneontol | 0.01369863 | Down |
| B4GALNT3  | 1 | geneontol | 0.01369863 | Down |
| EIF1AY    | 1 | geneontol | 0.01369863 | Down |
| OR10H2    | 1 | geneontol | 0.01369863 | Down |

|           |   |           |            |      |
|-----------|---|-----------|------------|------|
| TOMM22    | 1 | geneontol | 0.01369863 | Down |
| CACNA2D3/ | 2 | geneontol | 0.02739726 | Down |
| CACNA2D3/ | 2 | geneontol | 0.02739726 | Down |
| GPX8      | 1 | geneontol | 0.01369863 | Down |
| MAPKAPK5/ | 2 | geneontol | 0.02739726 | Down |
| LRRC52    | 1 | geneontol | 0.01369863 | Down |
| SLC25A21  | 1 | geneontol | 0.01369863 | Down |
| KAT5      | 1 | geneontol | 0.01369863 | Down |
| UGT1A10   | 1 | geneontol | 0.01369863 | Down |
| XRN2      | 1 | geneontol | 0.01369863 | Down |
| GPX8      | 1 | geneontol | 0.01369863 | Down |
| KAT5      | 1 | geneontol | 0.01369863 | Down |
| XRN2      | 1 | geneontol | 0.01369863 | Down |
| SLC25A21  | 1 | geneontol | 0.01369863 | Down |
| RPS4Y1    | 1 | geneontol | 0.01369863 | Down |
| CIB1      | 1 | geneontol | 0.01369863 | Down |
| KAT5      | 1 | geneontol | 0.01369863 | Down |
| MAPKAPK5  | 1 | geneontol | 0.01369863 | Down |
| IFNA17/IL | 2 | geneontol | 0.02739726 | Down |
| CIB1      | 1 | geneontol | 0.01369863 | Down |
| RAG2      | 1 | geneontol | 0.01369863 | Down |
| RAG2      | 1 | geneontol | 0.01369863 | Down |
| KAT5/RAG2 | 2 | geneontol | 0.02739726 | Down |
| MAPKAPK5/ | 3 | geneontol | 0.04109589 | Down |
| AMFR/CIB1 | 2 | geneontol | 0.02739726 | Down |
| KAT5      | 1 | geneontol | 0.01369863 | Down |
| DDX3Y     | 1 | geneontol | 0.01369863 | Down |
| SYNPR     | 1 | geneontol | 0.01369863 | Down |
| RAG2/GRAM | 3 | geneontol | 0.04109589 | Down |
| KDM5D     | 1 | geneontol | 0.01369863 | Down |

**Supplementary Table S5: Immune cell enrichment of GSE45291.**

|           | GSM110086 | GSM110087 |
|-----------|-----------|-----------|-----------|-----------|-----------|-----------|-----------|-----------|
| Adipocyte | 0         | 0.0166    | 0.0255    | 0         | 0         | 0         | 0.0361    | 0.0061    |
| Astrocyte | 0         | 0         | 0         | 0         | 0         | 0         | 0         | 0         |
| B-cells   | 0.1035    | 0.1174    | 0.072     | 0.1202    | 0.1525    | 0.0719    | 0.1198    | 0.0658    |
| Basophils | 0         | 0         | 0         | 0         | 0         | 0         | 0.0108    | 0         |
| CD4+ T-ce | 0.128     | 0.174     | 0.0826    | 0.1762    | 0.1189    | 0.0725    | 0.2318    | 0.0595    |
| CD4+ Tcm  | 0.0521    | 0.0703    | 0.0075    | 0.05      | 0.1211    | 0.1012    | 0.0844    | 0.0538    |
| CD4+ Tem  | 0.0854    | 0.0877    | 0.0347    | 0.0711    | 0.0466    | 0.062     | 0.0931    | 0.0459    |
| CD4+ memc | 0.1912    | 0.2041    | 0.0837    | 0.2125    | 0.1509    | 0.0859    | 0.3048    | 0.0844    |
| CD4+ naiv | 0.0422    | 0.1079    | 0.0508    | 0.1001    | 0.0665    | 0.0507    | 0.0462    | 0.0319    |
| CD8+ T-ce | 0.0796    | 0.1459    | 0.0777    | 0.1393    | 0.0665    | 0.0098    | 0.1458    | 0.1143    |
| CD8+ Tcm  | 0.0542    | 0.0679    | 0         | 0.057     | 0.0153    | 0         | 0.0899    | 0.06      |
| CD8+ Tem  | 0.001     | 0.0299    | 0.0093    | 0.0284    | 0.0228    | 0         | 0.0214    | 0.0829    |
| CD8+ naiv | 0.0878    | 0.0535    | 0.0639    | 0.068     | 0.0779    | 0.0473    | 0.0748    | 0.0593    |
| CLP       | 0.1059    | 0.091     | 0.0653    | 0.1172    | 0.0445    | 0.0194    | 0.0765    | 0.0504    |
| CMP       | 0         | 0         | 0.0437    | 0         | 0         | 0.0406    | 0.0088    | 0         |
| Chondrocy | 0.0087    | 0         | 0         | 0.0427    | 0         | 0         | 0.003     | 0         |
| Class-swi | 0.1396    | 0.1187    | 0.0724    | 0.0699    | 0.1617    | 0.1444    | 0.1067    | 0.0636    |
| DC        | 0         | 0.007     | 0         | 0.0111    | 0         | 0         | 0         | 0         |
| Endotheli | 0.0255    | 0.0119    | 0.0023    | 0         | 0.0148    | 0         | 0.0206    | 0.0388    |
| Eosinophi | 0.1413    | 0.1637    | 0.3062    | 0.2803    | 0.1701    | 0.2938    | 0.2102    | 0.2562    |
| Epithelia | 0.0522    | 0.0476    | 0.0556    | 0.049     | 0.0608    | 0.0918    | 0.0367    | 0.0688    |
| Erythrocy | 0.0164    | 0         | 0         | 0.0837    | 0.0881    | 0.1205    | 0.0596    | 0.1202    |
| Fibroblas | 0.0168    | 0.002     | 0         | 0.0287    | 0.0262    | 0         | 0.0519    | 0         |
| GMP       | 0         | 0         | 0.0343    | 0         | 0         | 0         | 0.0303    | 0         |
| HSC       | 0         | 0         | 0         | 0         | 0         | 0         | 0.0179    | 0         |
| Hepatocyt | 0.011     | 0.0101    | 0.0031    | 0         | 0         | 0         | 9.00E-04  | 3.00E-04  |
| Keratinoc | 0.0096    | 0         | 0         | 0         | 0.0263    | 0.0428    | 0.009     | 0.0108    |
| MEP       | 0         | 0.0566    | 0         | 0.0042    | 0         | 0         | 0.0221    | 0         |
| MPP       | 0         | 0         | 0.2119    | 0.0433    | 0.0862    | 0.1445    | 0.0171    | 0.0578    |
| MSC       | 0.0427    | 0.1453    | 0.1334    | 0.13      | 0.1904    | 0.371     | 0.0943    | 0.2523    |
| Macrophag | 0.0367    | 0.0573    | 0.061     | 0.0331    | 0.0436    | 0.0321    | 0.0358    | 0.035     |
| Macrophag | 0.0038    | 0.0207    | 0.0068    | 0.0053    | 0.0134    | 0.0114    | 1.00E-04  | 0.0013    |
| Macrophag | 0.0132    | 0.0149    | 0.051     | 0.0083    | 0.0194    | 0.0217    | 0         | 0.0336    |
| Mast cell | 0         | 0         | 0.0094    | 0.008     | 0.0045    | 0.011     | 0.0215    | 0.01      |
| Megakaryc | 0.2407    | 0         | 0.0935    | 0.1009    | 0.1685    | 0.2465    | 0.1095    | 0.2628    |
| Melanocyt | 0         | 0.0046    | 0.0047    | 0.0013    | 0.0117    | 0.0097    | 0.0017    | 0.001     |
| Memory B- | 0.0243    | 0.0511    | 0.0284    | 0.0443    | 0.0728    | 0.0543    | 0.0381    | 0.0338    |
| Mesangial | 0         | 0         | 0         | 0         | 0.0247    | 0.0131    | 0         | 0.0017    |
| Monocytes | 0         | 0         | 0         | 0         | 0         | 0         | 0         | 0         |
| Myocytes  | 0.0027    | 0         | 0         | 0.0063    | 0         | 6.00E-04  | 0         | 0         |
| NK cells  | 0.0994    | 0         | 0         | 0.0496    | 0.0348    | 0         | 0.0688    | 0.0955    |
| NKT       | 0.2357    | 0.2546    | 0.3415    | 0.1798    | 0.3645    | 0.3715    | 0.0165    | 0.3253    |
| Neurons   | 0.0021    | 0         | 0         | 0         | 3.00E-04  | 0.0027    | 0.0076    | 0         |
| Neutroph  | 0.0575    | 0.0858    | 0.1255    | 0.0375    | 0.0738    | 0.0825    | 0.0574    | 0.0603    |
| Osteoblas | 0.2835    | 0.2926    | 0.2482    | 0.2335    | 0.2556    | 0.1893    | 0.2548    | 0.2467    |
| Pericytes | 0.0546    | 0.0601    | 0.0541    | 0.035     | 0.0629    | 0.0455    | 0.0401    | 0.0503    |
| Plasma ce | 0.029     | 0.0067    | 0         | 0         | 0         | 0         | 0         | 0         |
| Platelets | 0.1559    | 0         | 0.0791    | 0.0779    | 0.1309    | 0.164     | 0.0611    | 0.1749    |
| Preadipoc | 0.079     | 0.0661    | 0.046     | 0.0625    | 0.0312    | 0         | 0.0902    | 0.0291    |



|           |        |        |          |        |        |        |        |        |
|-----------|--------|--------|----------|--------|--------|--------|--------|--------|
| Sebocytes | 0.003  | 0      | 5.00E-04 | 0.0026 | 0.0081 | 0.0069 | 0.005  | 0.004  |
| Skeletal  | 0      | 0.0076 | 0.0023   | 0.006  | 0.0056 | 0.0135 | 0.0013 | 0.0046 |
| Smooth mu | 0.1359 | 0.1038 | 0        | 0.0554 | 0.0246 | 0      | 0.0508 | 0.0251 |
| Tgd cells | 0      | 0      | 0        | 0      | 0      | 0      | 0      | 0.0033 |
| Th1 cells | 0.1499 | 0.1638 | 0.1107   | 0.1284 | 0.1242 | 0.093  | 0.1216 | 0.1531 |
| Th2 cells | 0.0375 | 0.0081 | 0.0078   | 0.0072 | 0.0119 | 0      | 0.0443 | 0.0198 |
| Tregs     | 0.0259 | 0.0215 | 0.0482   | 0.0634 | 0.0491 | 0.0374 | 0.1146 | 0.0078 |
| aDC       | 0      | 0      | 0        | 0.0017 | 0.0179 | 0.0189 | 0.0024 | 0      |
| cDC       | 0.0436 | 0.0421 | 0        | 0.0317 | 0.001  | 0      | 0.0269 | 0.0317 |
| iDC       | 0      | 0.0201 | 0        | 0.042  | 0      | 0      | 0.0079 | 0.0248 |
| ly Endoth | 0.0589 | 0.0806 | 0.0553   | 0.0791 | 0.0694 | 0.0782 | 0.0886 | 0.1109 |
| mv Endoth | 0.0544 | 0.0854 | 0.0728   | 0.0643 | 0.0761 | 0.0743 | 0.0379 | 0.1146 |
| naive B-c | 0.0909 | 0.1015 | 0.0757   | 0.1032 | 0.1099 | 0.0371 | 0.1116 | 0.0656 |
| pDC       | 0.0085 | 0      | 0        | 0      | 0.0017 | 0      | 0      | 0      |
| pro B-cel | 0      | 0      | 0.0041   | 0      | 0.0065 | 0.0027 | 0      | 0      |
| ImmuneSc  | 0.4307 | 0.5007 | 0.4896   | 0.5702 | 0.4431 | 0.3824 | 0.5941 | 0.4644 |
| StromaSc  | 0.0212 | 0.0152 | 0.0139   | 0.0144 | 0.0205 | 0      | 0.0543 | 0.0224 |
| Microenvi | 0.4518 | 0.516  | 0.5035   | 0.5845 | 0.4636 | 0.3824 | 0.6484 | 0.4868 |

| GSM110087 |
|-----------|-----------|-----------|-----------|-----------|-----------|-----------|-----------|-----------|-----------|
| 0.0197    | 0.0073    | 0.0121    | 0         | 0.0094    | 0.0076    | 0.0053    | 0         | 0         |           |
| 0         | 0         | 0         | 0         | 0         | 0         | 0         | 0         | 0         |           |
| 0.1474    | 0.0463    | 0.2777    | 0.0958    | 0.0892    | 0.0862    | 0.0293    | 0.1341    | 0         |           |
| 0.0322    | 0.0825    | 0         | 0.0233    | 0         | 0.0408    | 0         | 0.1472    | 0.0176    |           |
| 0.1394    | 0         | 0.1954    | 0.1285    | 0.126     | 0.0777    | 0.1193    | 0         | 0.034     |           |
| 0.0683    | 0.0086    | 0.0767    | 0.0455    | 0.0314    | 0.1038    | 0.0962    | 0         | 0.0496    |           |
| 0.0358    | 0.0039    | 0.0833    | 0.0285    | 0.024     | 0.0123    | 0.0407    | 3.00E-04  | 0         |           |
| 0.1867    | 0.0117    | 0.2893    | 0.1718    | 0.1747    | 0.098     | 0.1899    | 0         | 0.0131    |           |
| 0.0901    | 0         | 0.0369    | 0.0689    | 0.0514    | 0.0485    | 0.0408    | 0         | 0         |           |
| 0.0911    | 0         | 0.1696    | 0.0939    | 0.1267    | 0.0135    | 0.1181    | 0.0541    | 0.0382    |           |
| 0.0201    | 0         | 0.1084    | 0.0226    | 0.0501    | 0         | 0.0476    | 0.0066    | 6.00E-04  |           |
| 0.012     | 0         | 0.1633    | 0.0346    | 0.0723    | 0         | 0         | 0.0452    | 0.052     |           |
| 0.083     | 0.032     | 0.0408    | 0.0713    | 0.0511    | 0.0479    | 0.1005    | 0.0304    | 0.0697    |           |
| 0.0633    | 0.0238    | 0.1497    | 0.0925    | 0.101     | 0.0473    | 0.088     | 0.0242    | 0         |           |
| 0         | 0.0711    | 0.0179    | 0.001     | 0.0134    | 0         | 0         | 0.2214    | 0.1247    |           |
| 0.0198    | 0.0154    | 0         | 0         | 0.0215    | 0.005     | 0.0043    | 0         | 0.0503    |           |
| 0.0857    | 0.134     | 0.168     | 0.0745    | 0.0991    | 0.0655    | 0.0849    | 0.0582    | 0.0399    |           |
| 0         | 0         | 0         | 0.0095    | 0         | 0         | 0         | 0         | 0         |           |
| 0.0279    | 0         | 0         | 0.0097    | 0.0027    | 0.0295    | 0         | 0         | 0         |           |
| 0.1017    | 0.2902    | 0         | 0.3358    | 0.213     | 0.2106    | 0.2743    | 0.2409    | 0.2472    |           |
| 0.0542    | 0.0697    | 0.022     | 0.05      | 0.0414    | 0.0649    | 0.0451    | 0.0109    | 0.0291    |           |
| 0.0997    | 0         | 0.0874    | 0.0745    | 0.1005    | 0.1642    | 0.0848    | 0.0199    | 0.0669    |           |
| 0         | 0.0082    | 0.027     | 0.0292    | 0.0386    | 0.0427    | 0         | 0         | 0         |           |
| 0         | 0.0036    | 0.0153    | 0         | 4.00E-04  | 0         | 0         | 0.0557    | 0.0076    |           |
| 0         | 0         | 0.026     | 0.0076    | 0.0378    | 0.0328    | 0.0447    | 0         | 0         |           |
| 0.0043    | 0         | 0         | 0.0011    | 0         | 0.0116    | 0.0014    | 0         | 0         |           |
| 0.0116    | 0.0176    | 0.0136    | 0.0021    | 0.0067    | 0.0058    | 0.0041    | 0         | 0.0081    |           |
| 0.022     | 0         | 0.0853    | 0         | 0         | 0         | 0         | 0         | 0         |           |
| 0.0113    | 0.3136    | 0.0341    | 0.0119    | 0         | 0.0715    | 0.0218    | 0.4472    | 0.2431    |           |
| 0.0751    | 0.0897    | 0.109     | 0.1319    | 0.1241    | 0.1969    | 0.0428    | 0.2346    | 0.1095    |           |
| 0.0144    | 0.0485    | 0.0365    | 0.0298    | 0.0421    | 0.0406    | 0.0561    | 0.1136    | 0.0357    |           |
| 0.0049    | 0.0069    | 0.0136    | 0.004     | 0.0181    | 9.00E-04  | 0.0026    | 0.0312    | 5.00E-04  |           |
| 0.015     | 0.0497    | 0         | 0.0112    | 0.0221    | 0.0331    | 0.0129    | 0         | 0.0352    |           |
| 0.0223    | 0.0088    | 0.0298    | 0.0178    | 0.0097    | 0.0175    | 0.0069    | 0.0207    | 0.0148    |           |
| 0.2365    | 0.3042    | 0.0852    | 0.2069    | 0.1211    | 0.2034    | 0.3186    | 0.2039    | 0.0962    |           |
| 0.0055    | 0.0096    | 9.00E-04  | 0.0085    | 0.0161    | 0.014     | 0.0023    | 0         | 0.0147    |           |
| 0.0655    | 0         | 0.1194    | 0.0206    | 0.0473    | 0.0508    | 0         | 0.0432    | 0         |           |
| 0.0035    | 0.0087    | 0         | 0         | 0         | 0.0051    | 0         | 0.0096    | 0         |           |
| 0         | 0         | 0         | 0         | 0         | 0         | 0         | 0         | 0         |           |
| 0.0042    | 0         | 0.0096    | 0.0018    | 0         | 0.0028    | 8.00E-04  | 0         | 0         |           |
| 0.0536    | 0         | 0.2561    | 0.0852    | 0.1136    | 0         | 0         | 0.0158    | 0.0767    |           |
| 0.2227    | 0.3682    | 0.0497    | 0.1748    | 0.1932    | 0.3405    | 0.2917    | 0.298     | 0.3712    |           |
| 0.0011    | 0         | 0.008     | 1.00E-04  | 0.0029    | 0         | 0.0049    | 0         | 0.0062    |           |
| 0.0665    | 0.1033    | 0         | 0.0562    | 0.0642    | 0.1148    | 0.0608    | 0.1137    | 0.1263    |           |
| 0.1494    | 0.123     | 0.2985    | 0.2395    | 0.2418    | 0.1999    | 0.1821    | 0.1352    | 0.1192    |           |
| 0.0602    | 0.0336    | 0.0068    | 0.0423    | 0.0494    | 0.0652    | 0.0428    | 0.0132    | 0.0469    |           |
| 0         | 0.0137    | 0.0258    | 0         | 0         | 0         | 0.0383    | 0.0034    | 0         |           |
| 0.173     | 0.1943    | 0.0863    | 0.1126    | 0.1221    | 0.1058    | 0.1852    | 0.1193    | 0.1111    |           |
| 0.0757    | 0.0189    | 0.1142    | 0.0671    | 0.0663    | 0.039     | 0.074     | 0.0054    | 0.0166    |           |

|        |          |        |        |        |        |        |        |        |
|--------|----------|--------|--------|--------|--------|--------|--------|--------|
| 0.0051 | 9.00E-04 | 0.0053 | 0.0037 | 0.0038 | 0.0054 | 0.005  | 0.0025 | 0.0038 |
| 0.0017 | 0.0222   | 0      | 0      | 0.0081 | 0.0025 | 0      | 0      | 0      |
| 0.1205 | 0        | 0.1939 | 0.115  | 0.1037 | 0.0152 | 0.1689 | 0      | 0      |
| 0      | 0        | 0.0063 | 0      | 0.0039 | 0      | 0      | 0      | 0      |
| 0.1274 | 0.0333   | 0.2238 | 0.1657 | 0.1289 | 0.0944 | 0.1164 | 0.146  | 0.0649 |
| 0.0183 | 0.0462   | 0.0433 | 0      | 0.0331 | 0      | 0.0701 | 0.0388 | 0.0516 |
| 0.0659 | 0.0398   | 0.0506 | 0.0508 | 0.0536 | 0.0516 | 0.0189 | 0      | 0.0517 |
| 0      | 0        | 0.0061 | 0      | 0      | 0      | 0      | 0      | 0      |
| 0.0459 | 0        | 0.0745 | 0.0265 | 0.0498 | 0.0142 | 0.0292 | 0      | 0      |
| 0.0145 | 0        | 0      | 0.0562 | 0.0203 | 0.0083 | 0.0028 | 0      | 0      |
| 0.0851 | 0.0891   | 0.0516 | 0.0857 | 0.0256 | 0.085  | 0.0309 | 0.0375 | 0.0527 |
| 0.091  | 0.0644   | 0.0551 | 0.0942 | 0.0603 | 0.0855 | 0.034  | 0.049  | 0.0322 |
| 0.1392 | 0.0153   | 0.2051 | 0.0992 | 0.081  | 0.0974 | 0.002  | 0.1074 | 0      |
| 0.0081 | 0        | 0.0356 | 0      | 0.0223 | 0      | 0      | 0      | 0      |
| 0      | 0.0036   | 0.0081 | 0      | 0      | 0      | 0      | 0.0763 | 0.029  |
| 0.4243 | 0.3314   | 0.6434 | 0.5683 | 0.523  | 0.3739 | 0.4432 | 0.4619 | 0.3819 |
| 0.0238 | 0.0078   | 0.0195 | 0.0195 | 0.0254 | 0.0399 | 0.0026 | 0      | 0      |
| 0.4481 | 0.3392   | 0.6629 | 0.5878 | 0.5484 | 0.4138 | 0.4458 | 0.4619 | 0.3819 |

| GSM110088 |
|-----------|-----------|-----------|-----------|-----------|-----------|-----------|-----------|-----------|
| 0.0191    | 0.0142    | 0         | 0.0013    | 0.0169    | 0.0146    | 0.009     | 0         | 0         |
| 0         | 0         | 0         | 0         | 0         | 0         | 0         | 0         | 0         |
| 0.0401    | 0.0783    | 0.1201    | 0.1708    | 0.1123    | 0.0194    | 0.1467    | 0.1418    | 0.1908    |
| 0         | 0.0062    | 0.0777    | 0         | 0.0384    | 0         | 0         | 0         | 0.0214    |
| 0.1385    | 0.1165    | 0.1234    | 0.1537    | 0.1165    | 0.0287    | 0.1655    | 0.1557    | 0.1814    |
| 0.0283    | 0.0934    | 0.0585    | 0.0793    | 0.0793    | 0         | 0.0853    | 0.0833    | 0.1016    |
| 0.0177    | 0.0626    | 0.0506    | 0.0713    | 0.0523    | 0         | 0         | 0.0478    | 0.0811    |
| 0.1904    | 0.139     | 0.1677    | 0.2287    | 0.109     | 0.0408    | 0.2151    | 0.2049    | 0.2515    |
| 0.0258    | 0.0518    | 0.0701    | 0.0797    | 0.0811    | 0         | 0.0975    | 0.0946    | 0.1035    |
| 0.106     | 0.1224    | 0.1556    | 0.1018    | 0.1181    | 0.0461    | 0.089     | 0.1204    | 0.1838    |
| 0.0419    | 0.0417    | 0.0776    | 0.0292    | 0.0246    | 0.0231    | 0.0115    | 0.0528    | 0.0939    |
| 0         | 0.1342    | 0.0662    | 0.0485    | 0.0756    | 0.0327    | 0.028     | 0.0044    | 0.0784    |
| 0.0778    | 0.053     | 0.1074    | 0.0648    | 0.0492    | 0.074     | 0.0758    | 0.1181    | 0.0778    |
| 0.0985    | 0.0666    | 0.0764    | 0.0758    | 0.0357    | 0.0859    | 0.0939    | 0.0835    | 0.113     |
| 0.0279    | 0         | 0         | 0.0036    | 0.0034    | 0         | 0.002     | 0.0032    | 0         |
| 0.0261    | 0         | 0.0302    | 0.005     | 0         | 0.0396    | 0         | 0         | 0.0189    |
| 0.0937    | 0.118     | 0.0807    | 0.0853    | 0.1213    | 0.0535    | 0.0851    | 0.0733    | 0.1214    |
| 0         | 0.0546    | 0         | 0         | 0         | 0         | 0         | 0.0034    | 0.0021    |
| 0         | 0.0158    | 0.0122    | 0.0095    | 0.0192    | 0.0208    | 0.0042    | 0.0067    | 0.0032    |
| 0.2947    | 0.227     | 0.1402    | 0.1669    | 0.2353    | 0.2885    | 0.1764    | 0.3564    | 0.185     |
| 0.0485    | 0.0465    | 0.048     | 0.0483    | 0.057     | 0.0507    | 0.054     | 0.0454    | 0.0318    |
| 0.0498    | 0.1693    | 0.1526    | 0.0998    | 0.1       | 0         | 0.0959    | 0.1002    | 0.0625    |
| 0.0139    | 0.0646    | 0.0088    | 0         | 0         | 0.0341    | 0.0565    | 0         | 0.0022    |
| 0.0033    | 0         | 0         | 0         | 0         | 0         | 0         | 0         | 0         |
| 0.0329    | 0.026     | 0.0174    | 0.0185    | 0         | 7.00E-04  | 0.0307    | 0         | 0.0223    |
| 0         | 0.0127    | 0         | 0.0099    | 0.0037    | 0.0044    | 0.0089    | 0.009     | 0.0107    |
| 0         | 0.0078    | 0.0046    | 0.005     | 0.0116    | 0         | 0.0057    | 0         | 0.0014    |
| 0         | 0         | 0         | 0.0367    | 0.0588    | 0         | 0         | 0         | 0.024     |
| 0         | 0.047     | 0.0206    | 0.0067    | 0.0584    | 0.1113    | 0.0218    | 0.0163    | 0         |
| 0         | 0.3064    | 0.1009    | 0.098     | 0.281     | 0.0388    | 0.0902    | 0.1373    | 0.1333    |
| 0.0643    | 0.0421    | 0.0261    | 0.0386    | 0.0351    | 0.0957    | 0.0254    | 0.0088    | 0.0121    |
| 0.008     | 0.0097    | 0.0103    | 0.0065    | 0.0061    | 0.0131    | 0.0098    | 0         | 7.00E-04  |
| 0.0155    | 0.0305    | 0.0103    | 0.0128    | 0.0175    | 0.0387    | 0.0103    | 0         | 0         |
| 0.0079    | 0.0212    | 0.0099    | 0.0077    | 0.0141    | 0         | 0.0109    | 0.0136    | 0.012     |
| 0.2245    | 0.1806    | 0.2374    | 0.1553    | 0.035     | 0.1913    | 0.2579    | 0.1481    | 0.1428    |
| 0.0046    | 0.0049    | 0         | 3.00E-04  | 0.0034    | 0.0016    | 0.0168    | 0.0156    | 0         |
| 0         | 0.0479    | 0.0356    | 0.0699    | 0.0555    | 0         | 0.0568    | 0.0268    | 0.0811    |
| 0         | 0.011     | 0         | 0         | 0.0201    | 0         | 0         | 0         | 0         |
| 0         | 0         | 0         | 0         | 0         | 0.0013    | 0         | 0         | 0         |
| 0.0194    | 0         | 0.0058    | 0.0114    | 0         | 0         | 0.005     | 0         | 1.00E-04  |
| 0.0369    | 0.068     | 0.1015    | 0.1162    | 0.0724    | 0.0692    | 0.1201    | 0.032     | 0.1318    |
| 0.184     | 0.2462    | 0.1787    | 0.1339    | 0.3176    | 0.3127    | 0.1709    | 0.2158    | 0.0775    |
| 0.002     | 0.001     | 0         | 0.0018    | 0.0011    | 0.0021    | 0.0029    | 0         | 0.0062    |
| 0.0561    | 0.0302    | 0.0423    | 0.0474    | 0.0991    | 0.1093    | 3.00E-04  | 0.0445    | 0.0144    |
| 0.1964    | 0.2417    | 0.175     | 0.237     | 0.3032    | 0.2458    | 0.25      | 0.2584    | 0.2757    |
| 0.0254    | 0.0391    | 0.0205    | 0.0207    | 0.0563    | 0.0603    | 0.0501    | 0.0568    | 0.0196    |
| 0         | 0.0146    | 0         | 0         | 0.0173    | 0         | 0         | 0         | 0         |
| 0.1336    | 0.1179    | 0.1346    | 0.1307    | 0.0254    | 0.1021    | 0.1579    | 0.0927    | 0.0772    |
| 0.0942    | 0.0397    | 0.0626    | 0.0864    | 0.0211    | 0.0606    | 0.1003    | 0.0559    | 0.0953    |

|        |        |        |          |        |        |        |        |        |
|--------|--------|--------|----------|--------|--------|--------|--------|--------|
| 0.0036 | 0.0054 | 0.0048 | 0.0051   | 0.005  | 0.0024 | 0.0045 | 0.0015 | 0.0067 |
| 0      | 0.0034 | 0.0029 | 1.00E-04 | 0.0043 | 0      | 0      | 0      | 0.0029 |
| 0.1616 | 0.0052 | 0.0765 | 0.1215   | 0      | 0.0554 | 0.1396 | 0.1184 | 0.1114 |
| 0      | 0      | 0      | 0        | 0      | 0      | 0      | 0      | 0      |
| 0.1083 | 0.1459 | 0.2006 | 0.1199   | 0.1789 | 0.126  | 0.1211 | 0.147  | 0.1759 |
| 0.0557 | 0.0091 | 0.0162 | 0.0201   | 0      | 0.0073 | 0.004  | 0.0184 | 0.0321 |
| 0.0549 | 0      | 0      | 0.0237   | 0      | 0.0357 | 0.0772 | 0.0169 | 0.0168 |
| 0      | 0.0314 | 0      | 1.00E-04 | 0      | 0      | 0.0238 | 0      | 0      |
| 0.0286 | 0.0772 | 0.0143 | 0.0626   | 0.0324 | 0.0192 | 0.0428 | 0      | 0.0594 |
| 0      | 0.0284 | 0.003  | 0.0136   | 0      | 0      | 0.0054 | 0.0479 | 0.0445 |
| 0.0465 | 0.1115 | 0.0733 | 0.0445   | 0.0779 | 0.0379 | 0.0875 | 0.0558 | 0.0839 |
| 0.0406 | 0.1151 | 0.0769 | 0.0548   | 0.1261 | 0.0601 | 0.0575 | 0.075  | 0.0807 |
| 0.0136 | 0.0544 | 0.1366 | 0.163    | 0.0941 | 0.0032 | 0.1266 | 0.1398 | 0.1584 |
| 0      | 0.0346 | 0.0083 | 0        | 0      | 0      | 0.009  | 0      | 0.0236 |
| 0      | 0      | 0      | 0        | 0.0093 | 0      | 0      | 0      | 0.0022 |
| 0.4963 | 0.5069 | 0.4794 | 0.5354   | 0.5353 | 0.4388 | 0.4895 | 0.5844 | 0.6089 |
| 0.0165 | 0.0473 | 0.0105 | 0.0054   | 0.018  | 0.0347 | 0.0348 | 0.0034 | 0.0027 |
| 0.5128 | 0.5542 | 0.4899 | 0.5408   | 0.5533 | 0.4736 | 0.5244 | 0.5878 | 0.6116 |

| GSM110088 | GSM110089 |
|-----------|-----------|-----------|-----------|-----------|-----------|-----------|-----------|-----------|
| 0.0242    | 0.0126    | 0.0136    | 0.0258    | 0         | 0         | 0.0174    | 0.0198    | 0.0037    |
| 0         | 0         | 0         | 0         | 0         | 0         | 0         | 0         | 0         |
| 0.0928    | 0.1292    | 0         | 0.1913    | 0.2321    | 0.1076    | 0         | 0.0207    | 0         |
| 0.0121    | 0         | 0         | 0         | 0.0358    | 0         | 0         | 0         | 0         |
| 0.1724    | 0.1029    | 0.0057    | 0.1733    | 0.0736    | 0.0939    | 0.0627    | 0.1239    | 0.1423    |
| 0.0936    | 0.0978    | 0         | 0.0909    | 0.0524    | 0.0816    | 0         | 0.0736    | 0.0698    |
| 0.0705    | 0.0838    | 0         | 0.0716    | 0.074     | 0.0645    | 0         | 0.0391    | 0.0447    |
| 0.2405    | 0.1641    | 0.0546    | 0.2153    | 0.137     | 0.1343    | 0.1198    | 0.169     | 0.1884    |
| 0.0233    | 0.0246    | 0         | 0.0884    | 0.0164    | 0.0239    | 0         | 0.0541    | 0.0764    |
| 0.0847    | 0.0925    | 0         | 0.1457    | 0.0747    | 0.0647    | 0.0897    | 0.12      | 0.0567    |
| 0.0088    | 0.0344    | 0         | 0.0537    | 0         | 0.0191    | 0.0494    | 0.0468    | 0         |
| 0.004     | 0.0355    | 0         | 0.0955    | 0         | 0.0692    | 0.077     | 0.0649    | 0         |
| 0.0912    | 0.0988    | 0.0672    | 0.0832    | 0.1022    | 0.0585    | 0.0706    | 0.0934    | 0.0426    |
| 0.0967    | 0.0555    | 0.0544    | 0.1113    | 0.0437    | 0.053     | 0.1222    | 0.0663    | 0.0749    |
| 0.0095    | 0.0945    | 0.1653    | 0         | 0         | 0         | 0.0747    | 0         | 0.0238    |
| 0         | 0         | 0.041     | 0         | 0.0704    | 0         | 0         | 0         | 0         |
| 0.0718    | 0.0847    | 0.036     | 0.0807    | 0.1388    | 0.0653    | 0.0248    | 0.056     | 0.0305    |
| 0         | 0         | 0         | 0.0102    | 0         | 0.0085    | 0         | 0.013     | 0         |
| 0.0194    | 0         | 0         | 0.0158    | 0         | 0.0093    | 0         | 0.0029    | 0.0152    |
| 0.3185    | 0.3588    | 0.3103    | 0.1293    | 0         | 0.2324    | 0.2855    | 0.306     | 0.3678    |
| 0.0486    | 0.0584    | 0.0416    | 0.0351    | 0.0483    | 0.0566    | 0.0317    | 0.0399    | 0.0453    |
| 0.0576    | 0.0369    | 0.0057    | 0.0817    | 0.0991    | 0.0694    | 0.0197    | 0.1412    | 0.0871    |
| 0.0075    | 0.0144    | 0         | 0         | 0         | 0.0308    | 0.0361    | 0.0301    | 0.0151    |
| 0.0174    | 0         | 0.0656    | 0.0024    | 0         | 0         | 0.0665    | 0         | 0.0495    |
| 0.0057    | 0         | 4.00E-04  | 0.0088    | 0.0355    | 0.0146    | 0.0011    | 0.0041    | 0.0117    |
| 0         | 0.0049    | 0         | 0.007     | 0.0074    | 0         | 0         | 0.0048    | 0.0066    |
| 0.0085    | 0         | 7.00E-04  | 0.0051    | 0.0074    | 0.0108    | 0         | 9.00E-04  | 2.00E-04  |
| 0.0031    | 0         | 0         | 0.0428    | 0         | 0         | 0         | 0         | 0.0368    |
| 0.0623    | 0.1182    | 0.3454    | 0.0014    | 0         | 0.0867    | 0.1662    | 0.0154    | 0.1091    |
| 0.0986    | 0.0149    | 0.0772    | 0.1387    | 0.0668    | 0.3307    | 0.0467    | 0.1183    | 0.2166    |
| 0.0489    | 0.0402    | 0.0971    | 0.0321    | 0.0736    | 0.0494    | 0.0996    | 0.0358    | 0.1033    |
| 0.0076    | 0.0105    | 0.0129    | 0.0059    | 0.0235    | 6.00E-04  | 0.0181    | 0         | 0.0174    |
| 0.0066    | 0.0094    | 0.0282    | 0         | 0.0051    | 0.0549    | 0.0546    | 0.0265    | 0.0495    |
| 0.0239    | 0.0082    | 0.0097    | 0.0096    | 4.00E-04  | 0.0067    | 0.0076    | 0.0104    | 0         |
| 0.1964    | 0.2287    | 0.2647    | 0.1482    | 0.1923    | 0.2045    | 0.2096    | 0.1312    | 0.1991    |
| 0         | 0.0023    | 0.0038    | 0.0026    | 0.0168    | 0.0131    | 0.0092    | 0.0121    | 0.01      |
| 0.0159    | 0.0271    | 0         | 0.0866    | 0.108     | 0.0773    | 0         | 0         | 0         |
| 0         | 0         | 0         | 0         | 0         | 0.0083    | 0         | 0         | 0         |
| 0         | 0         | 0         | 0         | 0.0016    | 0         | 3.00E-04  | 0         | 0         |
| 0         | 0.0145    | 0         | 0         | 0.0087    | 0         | 0.0025    | 0.0051    | 9.00E-04  |
| 0.0207    | 0.0876    | 0.0634    | 0.1512    | 0         | 0.0624    | 0.1198    | 0.1593    | 0         |
| 0.0688    | 0.2955    | 0.2422    | 0.1254    | 0.285     | 0.2903    | 0.1735    | 0.1684    | 0.0955    |
| 0.001     | 0         | 0         | 0.0056    | 0.0048    | 2.00E-04  | 0         | 0         | 0         |
| 0.0769    | 0.0407    | 0.107     | 0.0239    | 0.0944    | 0.0467    | 0.0494    | 0.0484    | 0.0572    |
| 0.2627    | 0.2155    | 0.1586    | 0.2476    | 0.1534    | 0.1565    | 0.2155    | 0.2373    | 0.2502    |
| 0.0411    | 0.0316    | 0.0286    | 0.05      | 0.0403    | 0.0491    | 0.045     | 0.0382    | 0.0489    |
| 0         | 0         | 0.0236    | 0         | 0.0343    | 0         | 0         | 0         | 0         |
| 0.1081    | 0.1595    | 0.1747    | 0.1027    | 0.121     | 0.1331    | 0.1356    | 0.0962    | 0.0795    |
| 0.075     | 0.0778    | 0.0406    | 0.0917    | 0.0594    | 0.0125    | 0.0757    | 0.0699    | 0.0511    |

|        |        |        |        |        |        |        |        |        |
|--------|--------|--------|--------|--------|--------|--------|--------|--------|
| 0.0044 | 0.0048 | 0.0033 | 0.0033 | 0.0047 | 0.0039 | 0.0032 | 0.0046 | 0.0055 |
| 0      | 0.0029 | 0.0037 | 0      | 0.0042 | 0      | 0.0016 | 0.0053 | 0.0026 |
| 0.1044 | 0.1061 | 0.0546 | 0.1136 | 0.1233 | 0      | 0.1421 | 0.1215 | 0.0512 |
| 0      | 0.0053 | 0      | 0.0072 | 0      | 0      | 0.0032 | 0      | 0      |
| 0.1001 | 0.0949 | 0.0893 | 0.1626 | 0.0737 | 0.122  | 0.1272 | 0.1236 | 0.1215 |
| 0.0404 | 0.054  | 0.0509 | 0.04   | 0.024  | 0.0483 | 0.0518 | 0.0365 | 0      |
| 0.0562 | 0.0082 | 0.0606 | 0.049  | 0.0221 | 0.0066 | 0.0197 | 0.0287 | 0.019  |
| 0      | 0      | 0      | 0.0247 | 0.0018 | 0      | 0      | 0      | 0      |
| 0.017  | 0.0316 | 0      | 0.0605 | 0.0115 | 0.0599 | 0.0208 | 0.0051 | 0.0371 |
| 0.0136 | 0.0162 | 0      | 0.0185 | 0.0109 | 0.0242 | 0      | 0.0438 | 0.0064 |
| 0.1064 | 0.0488 | 0.0687 | 0.0657 | 0.0562 | 0.0802 | 0.0452 | 0.0809 | 0.0406 |
| 0.0692 | 0.0495 | 0.0367 | 0.0779 | 0.0352 | 0.073  | 0.0489 | 0.0686 | 0.0743 |
| 0.0947 | 0.1185 | 0      | 0.1744 | 0.1783 | 0.1009 | 0      | 0.0223 | 0      |
| 0      | 0      | 0      | 0.0193 | 0.0198 | 0.0337 | 0.0072 | 0.0078 | 0      |
| 0      | 0      | 0.0185 | 0      | 0.0121 | 0      | 0      | 0      | 0      |
| 0.5592 | 0.5734 | 0.3955 | 0.5777 | 0.3669 | 0.4482 | 0.4764 | 0.5583 | 0.4849 |
| 0.0256 | 0.0135 | 0.0068 | 0.0208 | 0      | 0.02   | 0.0268 | 0.0264 | 0.017  |
| 0.5848 | 0.5869 | 0.4023 | 0.5985 | 0.3669 | 0.4682 | 0.5032 | 0.5847 | 0.5019 |

| GSM110089 | GSM110089 | GSM11009C |
|-----------|-----------|-----------|-----------|-----------|-----------|-----------|-----------|-----------|
| 0.0133    | 0         | 0         | 0.0305    | 0.0129    | 0.037     | 0.0183    | 0.0017    | 0.0472    |
| 0         | 0         | 0         | 0         | 0         | 0         | 0         | 0         | 0         |
| 0.108     | 0.1288    | 0.1075    | 0.1174    | 0.1539    | 0.0186    | 0.0866    | 0.2372    | 0.118     |
| 0.0126    | 0         | 0         | 0         | 0         | 0         | 0         | 0         | 0         |
| 0.1512    | 0.0187    | 0.16      | 0.1964    | 0.1918    | 0.2072    | 0.1152    | 0.1375    | 0.2045    |
| 0.0634    | 0.0464    | 0.0883    | 0.0674    | 0.069     | 0.1543    | 0.0687    | 0.094     | 0.0945    |
| 0.0165    | 0         | 0.0278    | 0         | 0.0737    | 0.0646    | 0.0628    | 0.076     | 0.0146    |
| 0.1714    | 0.051     | 0.1859    | 0.2668    | 0.2401    | 0.2879    | 0.1716    | 0.2379    | 0.2371    |
| 0.0833    | 0.0427    | 0.1134    | 0.0998    | 0.0422    | 0.1507    | 0.0533    | 0.0082    | 0.0734    |
| 0.1701    | 0.0886    | 0.1283    | 0.1537    | 0.1041    | 0.1164    | 0.1064    | 0.1777    | 0.1533    |
| 0.0871    | 0         | 0.0589    | 0.0853    | 0.051     | 0.019     | 0.0642    | 0.0885    | 0.0647    |
| 0.1463    | 0         | 0.0443    | 0         | 0.0215    | 0         | 0.0855    | 0.086     | 0.1223    |
| 0.0572    | 0.1082    | 0.0826    | 0.108     | 0.0931    | 0.1053    | 0.0654    | 0.1007    | 0.0318    |
| 0.0727    | 0.0542    | 0.0798    | 0.1016    | 0.1153    | 0.1062    | 0.1108    | 0.1285    | 0.1058    |
| 0.0343    | 0         | 0         | 0         | 0.0146    | 0         | 0         | 0.0324    | 0         |
| 0         | 0.093     | 0         | 0.0448    | 0         | 0         | 0         | 0         | 0.0261    |
| 0.1149    | 0.0556    | 0.1216    | 0.1034    | 0.1256    | 0.1187    | 0.0766    | 0.0921    | 0.0937    |
| 0.005     | 0         | 0         | 0.0026    | 0.0612    | 0         | 0         | 0.0228    | 0         |
| 0         | 0         | 0         | 0.0295    | 0.002     | 0.0291    | 0.0099    | 0         | 0         |
| 0.2926    | 0.2452    | 0.373     | 0.1447    | 0.2127    | 0.1068    | 0.3288    | 0.2181    | 0.1502    |
| 0.0379    | 0.0351    | 0.0543    | 0.0276    | 0.0249    | 0.0429    | 0.0337    | 0.0268    | 0.0283    |
| 0.0117    | 0.0376    | 0.1264    | 0.1103    | 0.0316    | 0.1894    | 0.1135    | 0.0441    | 0.0718    |
| 0.015     | 0         | 0.0409    | 0.0505    | 0.0488    | 0         | 0.0184    | 0.0078    | 0.021     |
| 0.0289    | 0         | 0         | 0         | 0.0479    | 0         | 0.0045    | 0.0034    | 0.0237    |
| 0         | 0         | 0         | 0.0259    | 0.0271    | 0.0363    | 0         | 0.0136    | 0.0296    |
| 0         | 0         | 0         | 0.0071    | 0.0154    | 0.0176    | 0.0036    | 0.0058    | 0.0134    |
| 0         | 0.0018    | 0         | 0.0071    | 0         | 0.0173    | 0         | 0         | 0.0169    |
| 0.099     | 0         | 0         | 0         | 0.0807    | 0         | 0.0167    | 0.1028    | 0.0649    |
| 0.0879    | 0.1698    | 0.0675    | 0         | 0.013     | 0         | 0.0496    | 0.0215    | 0.0347    |
| 0.1735    | 0.0264    | 0.1598    | 0.052     | 0.0771    | 0.083     | 0.1194    | 0.0677    | 0.1265    |
| 0.0354    | 0.0636    | 0.0165    | 0.0163    | 0.0402    | 0.0261    | 0.0502    | 0.0141    | 0.0252    |
| 0.0152    | 0.0118    | 0.0093    | 0         | 0.0083    | 0.0081    | 0.0131    | 0         | 0.0163    |
| 0.0103    | 0.035     | 0         | 0         | 0.0027    | 0         | 0.0088    | 0         | 0.0028    |
| 0.0321    | 0         | 0.0141    | 0.0175    | 0.0017    | 0         | 0.0162    | 0.0141    | 0.0255    |
| 0.1464    | 0.2367    | 0.1178    | 0.1272    | 0.1246    | 0.2611    | 0.2067    | 0.2091    | 0.1538    |
| 0.0085    | 0.0066    | 0.0097    | 0.0101    | 0.0106    | 0.0046    | 0.0088    | 0.001     | 0.0089    |
| 0.0323    | 0.0287    | 0.0245    | 0.0609    | 0.0743    | 0.0049    | 0.0102    | 0.0931    | 0.0392    |
| 0.0046    | 0         | 0.0022    | 0         | 0         | 0         | 0         | 0         | 0         |
| 0         | 0         | 0         | 0         | 0         | 0         | 0         | 0         | 0         |
| 0         | 0.0056    | 0         | 0.0035    | 0.0116    | 0.0101    | 0.0028    | 0         | 0.0074    |
| 0.1143    | 0.028     | 0.0518    | 0.0461    | 0.1236    | 0         | 0.1464    | 0.1533    | 0.172     |
| 0.2027    | 0.3477    | 0.185     | 0.1033    | 0.0898    | 0.0294    | 0.1124    | 0.0876    | 0         |
| 0         | 0.0037    | 0         | 0.011     | 0.0103    | 0.0052    | 0         | 0.0077    | 0.0068    |
| 0.0421    | 0.0914    | 0.0206    | 0.0698    | 0         | 0.0484    | 0.0176    | 0         | 0.0086    |
| 0.3407    | 0.1874    | 0.2378    | 0.2046    | 0.2474    | 0.1833    | 0.2213    | 0.3009    | 0.2049    |
| 0.0532    | 0.0356    | 0.0512    | 0.0396    | 0.0425    | 0.0438    | 0.0406    | 0.0478    | 0.0487    |
| 0.0261    | 0         | 0         | 0         | 0.0114    | 0.0358    | 0.0392    | 0.0382    | 8.00E-04  |
| 0.0719    | 0.1429    | 0.1197    | 0.0942    | 0.0861    | 0.1722    | 0.1449    | 0.13      | 0.0999    |
| 0.068     | 0.0426    | 0.0634    | 0.0882    | 0.0885    | 0.1033    | 0.089     | 0.1108    | 0.0976    |



|        |        |        |        |        |        |        |        |        |
|--------|--------|--------|--------|--------|--------|--------|--------|--------|
| 0.0031 | 0.0028 | 0.0049 | 0.0051 | 0.002  | 0.0054 | 0.0045 | 0.0021 | 0.0037 |
| 0      | 0.0022 | 0      | 0      | 0      | 0.0069 | 0      | 0      | 0.0062 |
| 0.0358 | 0.0285 | 0.0567 | 0.0762 | 0.2112 | 0.1741 | 0.1423 | 0.1929 | 0.0852 |
| 0.0172 | 0      | 0      | 0      | 0      | 0      | 0.0084 | 0.0087 | 0.0245 |
| 0.2128 | 0.0436 | 0.1797 | 0.0497 | 0.1537 | 0.1174 | 0.1416 | 0.2109 | 0.1421 |
| 0.0362 | 0      | 0.0051 | 0.0482 | 0.0061 | 0.0217 | 0.0345 | 0.039  | 0.0247 |
| 0.0372 | 0.0047 | 0.015  | 0.0685 | 0.0732 | 0.0075 | 0      | 0.0284 | 0.0704 |
| 0.004  | 0      | 0      | 0.0012 | 0      | 0      | 0      | 0      | 0.0161 |
| 0.055  | 0.0077 | 0.0227 | 0.0481 | 0.0978 | 0.0485 | 0.0301 | 0.0786 | 0.059  |
| 0.0096 | 0      | 0.0231 | 0.0016 | 0.0808 | 0      | 0.0359 | 0.0711 | 0      |
| 0.0487 | 0.0612 | 0.0696 | 0.0882 | 0.033  | 0.0851 | 0.0819 | 0.0702 | 0.0733 |
| 0.0845 | 0.0582 | 0.0654 | 0.0479 | 0.0195 | 0.0716 | 0.1017 | 0.0743 | 0.031  |
| 0.0809 | 0.1171 | 0.1032 | 0.0936 | 0.1172 | 0.0036 | 0.0729 | 0.1906 | 0.0972 |
| 0      | 0.003  | 0      | 0.0326 | 0.0135 | 0      | 0      | 0.0081 | 0.0432 |
| 0      | 0.025  | 0      | 0      | 0      | 0      | 0      | 0      | 0      |
| 0.6339 | 0.4429 | 0.5812 | 0.5097 | 0.5928 | 0.349  | 0.5783 | 0.6499 | 0.5715 |
| 0.0142 | 0      | 0.0204 | 0.0552 | 0.0319 | 0.033  | 0.0233 | 0.0048 | 0.0341 |
| 0.648  | 0.4429 | 0.6016 | 0.5649 | 0.6246 | 0.382  | 0.6016 | 0.6546 | 0.6056 |

| GSM11009C |
|-----------|-----------|-----------|-----------|-----------|-----------|-----------|-----------|-----------|-----------|
| 0         | 0.0234    | 0         | 0         | 0.0309    | 0         | 0         | 0         | 0.022     |           |
| 0         | 0         | 0         | 0         | 0         | 0         | 0         | 0         | 0         |           |
| 0.0892    | 0.1264    | 0.267     | 0.1631    | 0.0614    | 0.1066    | 0.1561    | 0.0585    | 0.2534    |           |
| 0         | 0         | 0         | 0         | 0         | 0.0117    | 0         | 0         | 0.0092    |           |
| 0.165     | 0.1845    | 0.1483    | 0.1877    | 0.1565    | 0         | 0.1725    | 0.0636    | 0.1956    |           |
| 0.1206    | 0.0724    | 0.0752    | 0.0928    | 0.0267    | 0         | 0.1531    | 0.0458    | 0.0754    |           |
| 0.0591    | 0.0534    | 0.0683    | 0.0687    | 0.0486    | 0.0078    | 0.1465    | 0.0404    | 0.0937    |           |
| 0.2284    | 0.2322    | 0.1957    | 0.2843    | 0.2386    | 0         | 0.2495    | 0.0637    | 0.2958    |           |
| 0.061     | 0.1137    | 0.0575    | 0.026     | 0.0487    | 0.0438    | 0.0299    | 0.0492    | 0.0581    |           |
| 0.0567    | 0.2029    | 0.1248    | 0.1366    | 0.0856    | 0         | 0.1331    | 0.1175    | 0.1218    |           |
| 0.0366    | 0.098     | 0.0642    | 0.1058    | 0.045     | 0         | 0.0798    | 0.0536    | 0.0408    |           |
| 0.0416    | 0.0618    | 0.0588    | 0.092     | 0         | 0         | 0.084     | 0.0346    | 0.1076    |           |
| 0.0739    | 0.0877    | 0.0565    | 0.0558    | 0.0678    | 0.0177    | 0.0698    | 0.0758    | 0.0532    |           |
| 0.051     | 0.12      | 0.093     | 0.1228    | 0.1019    | 0.0182    | 0.0741    | 0.0596    | 0.136     |           |
| 0         | 0         | 0         | 0.0178    | 0         | 0         | 0         | 0.0244    | 0         |           |
| 0         | 0.0108    | 0.0074    | 0         | 0         | 0.0123    | 0         | 0         | 0         |           |
| 0.116     | 0.0798    | 0.1653    | 0.1485    | 0.0455    | 0.0875    | 0.1327    | 0.0553    | 0.1357    |           |
| 0.0035    | 0         | 0.0125    | 0         | 0         | 0         | 0         | 0         | 0         |           |
| 0.0179    | 0.0172    | 0.0052    | 0         | 0         | 0.0274    | 0         | 0.0235    | 0         |           |
| 0.1526    | 0.0764    | 0.1853    | 0.2491    | 0.3443    | 0.293     | 0.1299    | 0.3566    | 0.0769    |           |
| 0.0585    | 0.0314    | 0.0273    | 0.0403    | 0.0517    | 0.0732    | 0.0435    | 0.0677    | 0.0257    |           |
| 0.1344    | 0.0173    | 0.0641    | 0.1518    | 0.0771    | 0.022     | 0.1354    | 0.0596    | 0.1247    |           |
| 0.0467    | 0.0484    | 0.0295    | 0.0144    | 0.0037    | 0.0151    | 0.0892    | 0         | 0.0268    |           |
| 0         | 0         | 0         | 0         | 0.0092    | 0         | 0         | 0         | 0.0094    |           |
| 0         | 0         | 0.0207    | 0.053     | 0.0606    | 0         | 0.0649    | 0         | 0.0504    |           |
| 0.014     | 0.0094    | 0.0034    | 0         | 0.0037    | 0.0012    | 0.0094    | 0         | 0.0032    |           |
| 0.0062    | 0         | 0         | 0.006     | 0.0083    | 0.005     | 0         | 0         | 3.00E-04  |           |
| 0.0043    | 0.0267    | 0         | 0         | 0         | 0         | 0.0262    | 0         | 0.0489    |           |
| 0         | 0         | 0         | 0         | 0.0157    | 0.0502    | 0         | 0.092     | 0.0259    |           |
| 0.1932    | 0.0154    | 0.0844    | 0.1815    | 0         | 0.2155    | 0.2596    | 0.2419    | 0.0697    |           |
| 0.0499    | 0.0363    | 0.0548    | 0.0146    | 0.0336    | 0.0877    | 0.0429    | 0.0432    | 0.0165    |           |
| 0.0162    | 0.0033    | 0.0177    | 0         | 0.0076    | 0.019     | 0.0192    | 0         | 0.0052    |           |
| 0.0136    | 0         | 0.0088    | 0         | 0.0107    | 0.0356    | 0.0518    | 0.0216    | 0         |           |
| 0         | 9.00E-04  | 0.0045    | 0.0211    | 0.0155    | 0         | 0.0034    | 0.0153    | 0.0246    |           |
| 0.1352    | 0.1       | 0.0303    | 0.1752    | 0.2402    | 0.1559    | 0.21      | 0.2294    | 0.229     |           |
| 0.0079    | 0.0156    | 0.005     | 0.0107    | 0         | 0.0173    | 0.0062    | 0.0139    | 0.005     |           |
| 0.0372    | 0.0659    | 0.1188    | 0.0589    | 0         | 0.0452    | 0.0561    | 0.0327    | 0.0911    |           |
| 0         | 0         | 0         | 0         | 0         | 0.0047    | 0         | 0         | 0         |           |
| 0         | 0         | 0         | 0         | 0         | 0         | 0         | 0         | 0         |           |
| 0.0067    | 0.0071    | 0.0038    | 0.0038    | 0.0183    | 0         | 0.0067    | 0         | 0.0091    |           |
| 0.1183    | 0.1255    | 0.0907    | 0.168     | 0.0529    | 0         | 0.1235    | 0.0036    | 0.182     |           |
| 0.1702    | 0.1359    | 0.1886    | 0.0129    | 0.1196    | 0.4626    | 0.1406    | 0.3539    | 0         |           |
| 0.0058    | 0.0076    | 0.0043    | 0.0078    | 0.0012    | 0         | 1.00E-04  | 0         | 0.0037    |           |
| 0.0364    | 0.0479    | 0.075     | 0         | 0.0646    | 0.1299    | 0         | 0.0705    | 0         |           |
| 0.1889    | 0.2587    | 0.2704    | 0.1857    | 0.1601    | 0.2242    | 0.2022    | 0.2498    | 0.2508    |           |
| 0.0541    | 0.0402    | 0.0514    | 0.0211    | 0.0263    | 0.0613    | 0.0734    | 0.0712    | 0.0259    |           |
| 0.0353    | 0         | 0         | 0.0162    | 0         | 0.0101    | 0.0245    | 0         | 0.0562    |           |
| 0.1016    | 0.0712    | 0         | 0.1093    | 0.1579    | 0.0829    | 0.1336    | 0.144     | 0.1621    |           |
| 0.0656    | 0.1027    | 0.0699    | 0.0962    | 0.0887    | 0.0126    | 0.0885    | 0.0222    | 0.1259    |           |

|        |        |        |        |          |        |        |        |        |
|--------|--------|--------|--------|----------|--------|--------|--------|--------|
| 0.0035 | 0.0011 | 0.0025 | 0.0058 | 0.0037   | 0.0024 | 0.0034 | 0.0043 | 0.005  |
| 0.0071 | 0      | 0      | 0.0038 | 0        | 0.0082 | 0.0014 | 0.0131 | 0      |
| 0.1031 | 0.1675 | 0.1155 | 0.1609 | 0.1768   | 0      | 0.0901 | 0.008  | 0.1965 |
| 0.0122 | 0.0109 | 0      | 0.0162 | 0.002    | 0      | 0      | 0      | 0      |
| 0.0875 | 0.1437 | 0.1365 | 0.1321 | 0.1039   | 0.1059 | 0.1942 | 0.187  | 0.167  |
| 0.0283 | 0.0193 | 0.0169 | 0.0764 | 0.0537   | 0      | 0.0236 | 0      | 0.0692 |
| 0.0443 | 0.0239 | 0.018  | 0.0184 | 0.0619   | 0.0234 | 0.0031 | 0      | 0.0649 |
| 0      | 0      | 0      | 0      | 0        | 0      | 0.0136 | 0      | 0.0224 |
| 0.04   | 0.0958 | 0.033  | 0.0301 | 6.00E-04 | 0.0086 | 0.0076 | 0.013  | 0.0581 |
| 0.0189 | 0      | 0.0293 | 0.0372 | 0        | 0      | 0.0184 | 0      | 0.0012 |
| 0.085  | 0.0616 | 0.0642 | 0.0638 | 0.0308   | 0.0711 | 0.0065 | 0.09   | 0.0607 |
| 0.0787 | 0.0604 | 0.0579 | 0.0631 | 0.0267   | 0.102  | 0.0504 | 0.1026 | 0.0428 |
| 0.0746 | 0.0993 | 0.2142 | 0.1193 | 0.0845   | 0.0986 | 0.1097 | 0.0518 | 0.1997 |
| 0.0247 | 0.024  | 0.022  | 0.0077 | 0        | 0      | 0.0248 | 0      | 0.037  |
| 0      | 0      | 0.0025 | 0      | 0        | 0      | 0      | 0      | 0.0273 |
| 0.4477 | 0.5339 | 0.6419 | 0.6268 | 0.5429   | 0.4115 | 0.5076 | 0.4859 | 0.5805 |
| 0.0323 | 0.0445 | 0.0173 | 0.0072 | 0.0173   | 0.0213 | 0.0446 | 0.0118 | 0.0244 |
| 0.48   | 0.5784 | 0.6593 | 0.634  | 0.5602   | 0.4327 | 0.5522 | 0.4976 | 0.6049 |

| GSM110091 | GSM110091 | GSM110091 | GSM110091 | GSM110092 | GSM110092 | GSM110092 | GSM110092 | GSM110092 |
|-----------|-----------|-----------|-----------|-----------|-----------|-----------|-----------|-----------|
| 0.0345    | 0.0141    | 0.0255    | 0         | 0.0034    | 0.0203    | 0.0036    | 0         | 0         |
| 0         | 0         | 0         | 0         | 0         | 0         | 0         | 0         | 0         |
| 0.1366    | 0.0623    | 0.043     | 0.2236    | 0.2678    | 0.0847    | 0         | 0         | 0.1848    |
| 0         | 0.0802    | 0.0065    | 0         | 0.0181    | 0         | 0.0333    | 0.0412    | 0         |
| 0.2332    | 0.0975    | 0.166     | 0.1305    | 0.0995    | 0.1643    | 0         | 0.0386    | 0.1601    |
| 0.1421    | 0         | 0.1368    | 0.1193    | 0.0797    | 0.0902    | 0         | 0         | 0.0954    |
| 0.0944    | 0.0344    | 0.0772    | 0.0839    | 0.0914    | 0.0204    | 0         | 0         | 0.0291    |
| 0.3045    | 0.1209    | 0.2324    | 0.2024    | 0.1747    | 0.1964    | 0.0056    | 0.0679    | 0.1996    |
| 0.0618    | 0.0514    | 0.08      | 0.0115    | 0.0042    | 0.0784    | 0         | 0         | 0.0667    |
| 0.1438    | 0.0919    | 0.1309    | 0.1132    | 0.1699    | 0.1736    | 0.0031    | 0.051     | 0.116     |
| 0.0879    | 0.0369    | 0.0094    | 0.0649    | 0.0926    | 0.0853    | 0.0161    | 0         | 0.043     |
| 0.0465    | 0         | 0         | 0.0609    | 0.1163    | 0.1436    | 0.0326    | 0.0184    | 0.0332    |
| 0.0971    | 0.0713    | 0.1095    | 0.0605    | 0.066     | 0.0477    | 0.1054    | 0.045     | 0.0492    |
| 0.1263    | 0.0772    | 0.0734    | 0.0931    | 0.0675    | 0.1027    | 0.0443    | 0.0327    | 0.0917    |
| 0.0209    | 0         | 0.0354    | 0         | 0         | 0         | 0.1572    | 0         | 0.0297    |
| 0         | 0.0128    | 0.0272    | 0         | 0         | 0         | 0.0597    | 0.0107    | 0         |
| 0.1006    | 0.0672    | 0.1164    | 0.1534    | 0.1076    | 0.0695    | 0.018     | 0.0557    | 0.137     |
| 0         | 0         | 0         | 0.0076    | 0.0275    | 0         | 0         | 0         | 0         |
| 0.0056    | 0         | 0.0151    | 0.0076    | 0.0342    | 0.0222    | 0         | 0.0368    | 0.0102    |
| 0.1901    | 0.2786    | 0.2511    | 0.1565    | 0.0969    | 0.1319    | 0.3006    | 0.2487    | 0.2382    |
| 0.0475    | 0.051     | 0.0587    | 0.0432    | 0.0331    | 0.0438    | 0.0531    | 0.0519    | 0.0481    |
| 0.0727    | 0.0311    | 0.2114    | 0.0962    | 0.1309    | 0.1227    | 0         | 0.0771    | 0.0478    |
| 0.0506    | 0         | 0.0154    | 0         | 0         | 0.0145    | 0         | 0.0219    | 0         |
| 0.0182    | 0         | 0         | 0         | 0         | 0         | 0.0709    | 0         | 0         |
| 0.0103    | 0         | 0.0081    | 0.0255    | 0.0085    | 0.005     | 0         | 0         | 0.0449    |
| 0.0064    | 5.00E-04  | 0.0059    | 0.0089    | 0.012     | 0.0095    | 0         | 0.0015    | 0.0074    |
| 0.0029    | 0         | 0.0161    | 0         | 0         | 0.0014    | 0.0096    | 0.0124    | 0.0075    |
| 0         | 0         | 0         | 0.0329    | 0.0501    | 0.0134    | 0         | 0         | 0.0372    |
| 0.0064    | 0         | 0.0606    | 0.048     | 0.0281    | 0.0263    | 0.3733    | 0.1027    | 0.0371    |
| 0.0407    | 0.0765    | 0.1       | 0.1589    | 0.1622    | 0.1359    | 0.0506    | 0.1976    | 0.2244    |
| 0.0032    | 0.0394    | 0.0727    | 0.03      | 0.052     | 0.0644    | 0.0796    | 0.0425    | 0.038     |
| 0         | 0.0017    | 0.0133    | 0.0013    | 0.0127    | 0.0208    | 0.0109    | 0.0086    | 0.0142    |
| 0         | 0.0366    | 0.0195    | 0         | 0         | 2.00E-04  | 0.0375    | 0.0347    | 0.0106    |
| 0.0076    | 0.0013    | 0         | 0.0193    | 0.012     | 0.0101    | 0.0059    | 0.0017    | 0.0173    |
| 0.0528    | 0.1544    | 0.1633    | 0.1315    | 0.0477    | 0.1601    | 0.1931    | 0.2207    | 0.1531    |
| 0.0213    | 8.00E-04  | 0         | 0.0185    | 0.0035    | 0.0067    | 0.0016    | 0.0205    | 0.012     |
| 0.0437    | 0.0078    | 0.0139    | 0.1057    | 0.1316    | 0.0302    | 0         | 0.0051    | 0.0789    |
| 0         | 0         | 0.0053    | 0         | 0         | 0         | 0.0032    | 0.0089    | 0         |
| 0         | 0         | 0         | 0         | 0         | 0         | 0         | 0         | 0         |
| 0.0144    | 0.0045    | 0.0204    | 0         | 0         | 0         | 0.0026    | 0         | 0         |
| 0.1088    | 0         | 0         | 0.0831    | 0.1529    | 0.1392    | 0.1415    | 0.0537    | 0.0686    |
| 0.092     | 0.3006    | 0.2017    | 0.2642    | 0.1794    | 0.1489    | 0.2447    | 0.2877    | 0.1646    |
| 0.008     | 0         | 0         | 0.0033    | 0         | 1.00E-04  | 0.003     | 0         | 0         |
| 0.047     | 0.086     | 0.0874    | 0.0646    | 0.061     | 0.0332    | 0.0781    | 0.1147    | 0.0444    |
| 0.2178    | 0.2313    | 0.1436    | 0.2495    | 0.2556    | 0.2416    | 0.2083    | 0.1779    | 0.1729    |
| 0.0345    | 0.0306    | 0.0428    | 0.0514    | 0.0608    | 0.058     | 0.0325    | 0.0717    | 0.0511    |
| 0.006     | 0         | 0.0436    | 0.0253    | 0.0148    | 0.0047    | 0         | 0         | 0         |
| 0.0455    | 0.0984    | 0.0565    | 0.0722    | 0.0408    | 0.0968    | 0.1266    | 0.1293    | 0.0898    |
| 0.1062    | 0.0535    | 0.0326    | 0.0709    | 0.0663    | 0.0709    | 0.0472    | 0.0374    | 0.0667    |

|        |        |        |          |        |        |        |        |        |
|--------|--------|--------|----------|--------|--------|--------|--------|--------|
| 0.0011 | 0.0047 | 0.0068 | 0.0031   | 0.0026 | 0.0052 | 0.0026 | 0.0036 | 0.0042 |
| 0      | 0.0026 | 0.025  | 0        | 0      | 0      | 0.0092 | 0.0073 | 0      |
| 0.1787 | 0.1016 | 0.0868 | 0.088    | 0.0904 | 0.1356 | 0.041  | 0      | 0.0648 |
| 0.0083 | 0      | 0      | 0        | 0      | 0.016  | 0      | 0      | 0      |
| 0.0966 | 0.1286 | 0.1155 | 0.1934   | 0.2262 | 0.2246 | 0.0255 | 0.0975 | 0.1431 |
| 0.0608 | 0.0124 | 0.0141 | 0.0112   | 0.0132 | 0.0196 | 0.0791 | 0.0029 | 0.0228 |
| 0.0603 | 0.023  | 0      | 2.00E-04 | 0      | 0.0349 | 0      | 0.059  | 0.054  |
| 0      | 0      | 0.006  | 0        | 0      | 0.0115 | 0      | 0      | 0      |
| 0.0374 | 0      | 0      | 0.0746   | 0.0917 | 0.0407 | 0      | 0.0282 | 0.0532 |
| 0.0107 | 0      | 0      | 0.0164   | 0.0346 | 0      | 0      | 0.0146 | 0.0323 |
| 0.0528 | 0.0509 | 0.0711 | 0.0555   | 0.0815 | 0.0714 | 0.0551 | 0.0849 | 0.071  |
| 0.049  | 0.0783 | 0.0707 | 0.0771   | 0.1053 | 0.0918 | 0.0396 | 0.1012 | 0.0669 |
| 0.1157 | 0.0562 | 0.0106 | 0.1641   | 0.2047 | 0.0802 | 0      | 0.0012 | 0.157  |
| 0      | 0      | 0      | 0.0079   | 0.0264 | 0.0057 | 0      | 0.0051 | 0.0057 |
| 0      | 0      | 0      | 0        | 0      | 0      | 0      | 0.0165 | 0.009  |
| 0.5802 | 0.438  | 0.5007 | 0.5523   | 0.6263 | 0.5343 | 0.4059 | 0.3673 | 0.5783 |
| 0.0454 | 0.007  | 0.028  | 0.0038   | 0.0188 | 0.0285 | 0.0018 | 0.0294 | 0.0051 |
| 0.6255 | 0.445  | 0.5287 | 0.5561   | 0.6451 | 0.5628 | 0.4077 | 0.3966 | 0.5834 |

| GSM110092 | GSM110092 | GSM110092 | GSM110092 | GSM110092 | GSM110092 | GSM110093 | GSM110093 | GSM110093 | GSM110093 |
|-----------|-----------|-----------|-----------|-----------|-----------|-----------|-----------|-----------|-----------|
| 0.0185    | 0.0443    | 0.0258    | 0.0203    | 0.0072    | 0.0097    | 0.007     | 0.0098    | 0.0207    |           |
| 0         | 0         | 0         | 0         | 0         | 0         | 0         | 0         | 0         |           |
| 0.0676    | 0.1053    | 0.1859    | 0.1334    | 0.1364    | 0.0737    | 0.1582    | 0.2041    | 0.0365    |           |
| 0         | 0.0154    | 0.07      | 0         | 0.0364    | 0.0475    | 0.1015    | 0.0399    | 0.0637    |           |
| 0.1401    | 0.142     | 0.1648    | 0.0775    | 0.1585    | 0.1556    | 0.0787    | 0.1486    | 0.0412    |           |
| 0.1134    | 0.0602    | 0.1286    | 0.1063    | 0.0664    | 0.0262    | 0.06      | 0.015     | 0.0477    |           |
| 0.0643    | 0.0615    | 0.041     | 0.0732    | 0.0078    | 0.0601    | 0.0523    | 0.0972    | 0         |           |
| 0.1882    | 0.1559    | 0.196     | 0.1014    | 0.2093    | 0.2009    | 0.0933    | 0.224     | 0.0639    |           |
| 0.0605    | 0.0842    | 0.06      | 0.0341    | 0.0782    | 0.0518    | 0.0391    | 0.0339    | 0         |           |
| 0.1133    | 0.1231    | 0.0789    | 0.0617    | 0.1466    | 0.1738    | 0.1664    | 0.1099    | 0.052     |           |
| 0         | 0.0603    | 0.0161    | 0.0129    | 0.0598    | 0.1239    | 0.0776    | 0.0587    | 0         |           |
| 0.121     | 0.0978    | 0         | 0.1116    | 0.0013    | 0.1304    | 0.0632    | 0.0442    | 0         |           |
| 0.0702    | 0.0292    | 0.0817    | 0.0137    | 0.1196    | 0.0327    | 0.0721    | 0.0774    | 0.0673    |           |
| 0.083     | 0.073     | 0.0452    | 0.0426    | 0.0837    | 0.1103    | 0.0802    | 0.1158    | 0.0489    |           |
| 0.0371    | 0         | 0.0137    | 0         | 0         | 0.0872    | 0.0209    | 0         | 0.0233    |           |
| 0         | 0         | 0         | 0         | 0         | 0         | 0         | 0         | 0         |           |
| 0.0388    | 0.106     | 0.1239    | 0.1456    | 0.088     | 0.1022    | 0.1036    | 0.101     | 0.0649    |           |
| 0.0045    | 0         | 0.0119    | 0.0011    | 0         | 0.0169    | 0         | 0         | 0         |           |
| 0.0055    | 0         | 0         | 0.0107    | 0         | 0         | 0         | 3.00E-04  | 0.0198    |           |
| 0.3493    | 0.1976    | 0.2372    | 0.2074    | 0.1933    | 0.2926    | 0.1337    | 0.1792    | 0.3012    |           |
| 0.0436    | 0.0588    | 0.0363    | 0.0698    | 0.0478    | 0.0244    | 0.0698    | 0.042     | 0.0468    |           |
| 0.1562    | 0.0618    | 0.1915    | 0.1114    | 0.0662    | 0.0719    | 0.0469    | 0.0351    | 0.1698    |           |
| 0.013     | 0.0149    | 0.0453    | 0.024     | 0         | 0.0205    | 0.0194    | 0         | 0         |           |
| 0         | 0         | 0         | 0         | 0         | 0.0633    | 0         | 0         | 0         |           |
| 0.006     | 0         | 0.0421    | 0         | 0.0104    | 0         | 0         | 0         | 0         |           |
| 0         | 0.011     | 0.0074    | 0.0015    | 0.0073    | 0         | 0.0298    | 0.0056    | 0.0024    |           |
| 0         | 0         | 0.0067    | 0.0227    | 0.0072    | 0         | 0.0055    | 6.00E-04  | 0         |           |
| 0         | 0.0254    | 0         | 0.0429    | 0         | 0         | 0.0042    | 0         | 0         |           |
| 0.0783    | 0.0863    | 0.0548    | 0.0575    | 0         | 0.1359    | 0.1353    | 0.0253    | 0.0651    |           |
| 0.2036    | 0.1425    | 0.2213    | 0.2314    | 0.1       | 0.145     | 0.177     | 0.0762    | 0.2793    |           |
| 0.0375    | 0.0567    | 0.0178    | 0.0239    | 0.0071    | 0.0724    | 0.0427    | 0.0332    | 0.0525    |           |
| 0.0129    | 0.0093    | 0.0016    | 0.0144    | 0         | 0.0184    | 0.0131    | 0.0185    | 0.0113    |           |
| 0.0069    | 0.0069    | 0         | 0.01      | 0         | 0.0055    | 0.0611    | 0.0053    | 0.0191    |           |
| 0.0212    | 0.005     | 0.0099    | 0.0113    | 0.0047    | 0.024     | 0         | 0         | 0.004     |           |
| 0.1311    | 0.0734    | 0.1223    | 0.1497    | 0.0924    | 0.0851    | 0.1944    | 0.1355    | 0.2252    |           |
| 0.0112    | 0.0163    | 0.0172    | 0.0193    | 0.0115    | 0.014     | 0.0079    | 0.0124    | 0.0064    |           |
| 0.0127    | 0.0658    | 0.0855    | 0.0804    | 0.0536    | 0.001     | 0.071     | 0.0827    | 0.0177    |           |
| 0         | 0         | 0         | 0.0371    | 0         | 0         | 0         | 0         | 0         |           |
| 0         | 0         | 0         | 0         | 0         | 0         | 0         | 0         | 0         |           |
| 6.00E-04  | 0         | 0         | 0.0072    | 0.0046    | 0.0068    | 0.0061    | 0         | 0         |           |
| 0.1417    | 0.0778    | 0         | 0.0717    | 0.0807    | 0.1268    | 0.0827    | 0.0889    | 0         |           |
| 0.1677    | 0.2671    | 0.1063    | 0.3845    | 0.1741    | 0.0854    | 0.3099    | 0.1161    | 0.2847    |           |
| 0         | 5.00E-04  | 0         | 0.0017    | 0.0069    | 0         | 0         | 0         | 0         |           |
| 0.0398    | 0.0766    | 0.0732    | 0.0577    | 0.074     | 0.0108    | 0.0502    | 0.0418    | 0.1114    |           |
| 0.2226    | 0.3121    | 0.1857    | 0.2077    | 0.2321    | 0.2797    | 0.3026    | 0.2719    | 0.1732    |           |
| 0.0599    | 0.0695    | 0.0464    | 0.0471    | 0.0356    | 0.0448    | 0.0368    | 0.0438    | 0.0423    |           |
| 0         | 0         | 0.0011    | 0         | 0         | 0.0429    | 0.0186    | 0.0032    | 0         |           |
| 0.096     | 0.0484    | 0.1216    | 0.1147    | 0.0778    | 0.0696    | 0.0961    | 0.1095    | 0.114     |           |
| 0.0319    | 0.0557    | 0.0579    | 0.0271    | 0.0831    | 0.1003    | 0.0535    | 0.077     | 0.0116    |           |

|          |          |          |        |        |          |        |        |        |
|----------|----------|----------|--------|--------|----------|--------|--------|--------|
| 0.0039   | 0.0029   | 0.0053   | 0.0076 | 0.0043 | 8.00E-04 | 0.0029 | 0.0037 | 0.0019 |
| 0.0055   | 0        | 2.00E-04 | 0.0101 | 0      | 6.00E-04 | 0.0142 | 0.0045 | 0.0036 |
| 0.0195   | 0.0412   | 0.0404   | 0      | 0.155  | 0.1162   | 0      | 0.1562 | 0      |
| 0        | 0        | 0        | 0      | 0      | 0.0257   | 0      | 0.0062 | 0      |
| 0.1935   | 0.1815   | 0.175    | 0.1636 | 0.1252 | 0.1733   | 0.2141 | 0.122  | 0.1412 |
| 0.0243   | 1.00E-04 | 0        | 0      | 0.0194 | 0.0625   | 0.0264 | 0.0321 | 0      |
| 5.00E-04 | 0.0299   | 0.0309   | 0.042  | 0.0604 | 0.0051   | 0.0017 | 0.0666 | 0.0157 |
| 0        | 0        | 0.0084   | 0.0045 | 0      | 0        | 0      | 0.0034 | 0      |
| 0.0123   | 0.0368   | 0.013    | 0.0547 | 0.0452 | 0.0096   | 0.0141 | 0.0355 | 0.0136 |
| 0.0475   | 0.0085   | 0.0267   | 0.0261 | 0.0054 | 0.0181   | 0.0029 | 0.0022 | 0      |
| 0.0779   | 0.0356   | 0.0473   | 0.0878 | 0.0582 | 0.0303   | 0.0637 | 0.0577 | 0.0374 |
| 0.0961   | 0.0672   | 0.0936   | 0.125  | 0.0485 | 0.0495   | 0.1103 | 0.063  | 0.061  |
| 0.0808   | 0.0835   | 0.1437   | 0.1028 | 0.1139 | 0.0572   | 0.1091 | 0.188  | 0.0088 |
| 0        | 0        | 0.006    | 0.0367 | 0.0174 | 0        | 0      | 0.0118 | 0      |
| 0        | 0        | 0.0321   | 0.0204 | 0      | 0        | 0      | 0.0034 | 0      |
| 0.61     | 0.5227   | 0.5197   | 0.4305 | 0.5342 | 0.6311   | 0.4751 | 0.5371 | 0.3992 |
| 0.0185   | 0.0296   | 0.0356   | 0.0275 | 0.0036 | 0.0151   | 0.0132 | 0.005  | 0.0202 |
| 0.6285   | 0.5523   | 0.5553   | 0.458  | 0.5378 | 0.6462   | 0.4883 | 0.5422 | 0.4194 |

| GSM110093 | GSM110093 | GSM110093 | GSM110093 | GSM110093 | GSM110093 | GSM110094 | GSM110094 | GSM110094 |
|-----------|-----------|-----------|-----------|-----------|-----------|-----------|-----------|-----------|
| 0         | 6.00E-04  | 0.0159    | 0.0026    | 0.0179    | 0         | 0.027     | 4.00E-04  | 0         |
| 0         | 0         | 0         | 0         | 0         | 0         | 0         | 0         | 0         |
| 0.1504    | 0.0974    | 0.183     | 0.1432    | 0.125     | 0.1259    | 0.2192    | 0.1229    | 0.0277    |
| 0         | 0         | 0         | 0.037     | 0         | 0.0595    | 0         | 0.0221    | 0         |
| 0.1606    | 0.1634    | 0.1945    | 0.1492    | 0.1994    | 0.1244    | 0.0981    | 0.1201    | 0.0614    |
| 0.1555    | 0.0552    | 0.1091    | 0.0589    | 0.1       | 0.0572    | 0.0126    | 0.0646    | 0.0331    |
| 0.1072    | 0.0631    | 0.0707    | 0.0522    | 0.0501    | 0.0217    | 0.0708    | 0.0201    | 0.0162    |
| 0.2542    | 0.2384    | 0.2503    | 0.2349    | 0.2422    | 0.1742    | 0.157     | 0.1515    | 0.0597    |
| 0.0378    | 0.0528    | 0.0817    | 0         | 0.1138    | 0.0533    | 0.03      | 0.089     | 0.0196    |
| 0.1471    | 0.0994    | 0.162     | 0.1076    | 0.1182    | 0.1124    | 0.1378    | 0.136     | 0.0939    |
| 0.1052    | 0.0502    | 0.1175    | 0.0606    | 0.0374    | 0.044     | 0.0776    | 0.0605    | 0.0345    |
| 0.147     | 0.0175    | 0         | 0.0461    | 0.0375    | 0.0144    | 0.0926    | 0.0464    | 0.0781    |
| 0.0325    | 0.0773    | 0.0776    | 0.0841    | 0.0702    | 0.0732    | 0.0518    | 0.0699    | 0.0563    |
| 0.0747    | 0.1162    | 0.0987    | 0.106     | 0.097     | 0.1074    | 0.0749    | 0.067     | 0.0547    |
| 0         | 0.0034    | 0         | 0.0019    | 0         | 0         | 0         | 0.0038    | 0.0404    |
| 0         | 0.0303    | 0         | 0.0076    | 0         | 0         | 0         | 0         | 0         |
| 0.1224    | 0.0745    | 0.0845    | 0.0589    | 0.0791    | 0.0825    | 0.1499    | 0.0906    | 0.0579    |
| 0.0045    | 0         | 0.0239    | 0         | 0         | 0         | 0         | 0         | 0.0025    |
| 0.0317    | 0.0027    | 0.0056    | 0         | 0.0127    | 0.0126    | 0.0061    | 0.009     | 0         |
| 0.1635    | 0.1917    | 0.08      | 0.1405    | 0.2225    | 0.2123    | 0.1303    | 0.2729    | 0.356     |
| 0.0526    | 0.0275    | 0.0363    | 0.0302    | 0.0517    | 0.0609    | 0.0506    | 0.0529    | 0.0513    |
| 0.1641    | 0.0783    | 0.0957    | 0.0879    | 0.0388    | 0.056     | 0.0347    | 0.1326    | 0.1331    |
| 0.0391    | 0.0304    | 0.0446    | 0.0289    | 0         | 0.0598    | 0         | 0         | 0.0365    |
| 0         | 0.0211    | 0         | 0.0237    | 0.0064    | 0         | 0         | 0.0033    | 0.0024    |
| 0.0166    | 0.0225    | 0.0409    | 0.0345    | 0         | 0.0134    | 0         | 0         | 0         |
| 0         | 0.0064    | 0.0162    | 0.0118    | 0.0102    | 0.0128    | 0.0144    | 0.0035    | 0.0038    |
| 0.0277    | 0.004     | 0.0022    | 0.0068    | 0.0014    | 0.0057    | 0         | 0.0033    | 0.0051    |
| 0.0678    | 0         | 0.0708    | 0         | 0.0074    | 0         | 0.0065    | 0         | 0.0461    |
| 0.0024    | 0         | 0         | 0.0318    | 0.0358    | 0.0039    | 0.042     | 0.0611    | 0.0961    |
| 0.2289    | 0.0121    | 0.1625    | 0.0422    | 0.1024    | 0.1538    | 0.1677    | 0.1469    | 0.2582    |
| 0         | 0.0325    | 0.0363    | 0.0419    | 0.0548    | 0.032     | 0.0439    | 0.0203    | 0.0643    |
| 3.00E-04  | 0.0064    | 0.0074    | 0.0148    | 0.0127    | 0.0068    | 0         | 0.0015    | 0.0078    |
| 0         | 0.0088    | 0.0256    | 0.015     | 0.0088    | 0.0162    | 0.0068    | 4.00E-04  | 0.0585    |
| 0.0015    | 0.0164    | 0.0069    | 0.0235    | 0         | 0.0136    | 0         | 0.0151    | 0.0197    |
| 0.1967    | 0.1997    | 0.0895    | 0.1933    | 0.1533    | 0.2676    | 0.0758    | 0.199     | 0.1428    |
| 0.0095    | 0.0124    | 0.0111    | 0.0113    | 0.012     | 0.026     | 0.0109    | 0.0205    | 0.0133    |
| 0.0708    | 0.0215    | 0.0984    | 0.0289    | 0.0456    | 0.0494    | 0.0951    | 0.0549    | 0         |
| 0.0065    | 0         | 0         | 0         | 0         | 0.0153    | 0         | 0         | 0         |
| 0         | 0         | 0         | 0         | 0         | 0         | 0         | 0         | 0         |
| 0         | 0.0172    | 0.0062    | 0.0116    | 0.0054    | 0.002     | 0         | 0         | 0         |
| 0.1407    | 0.0972    | 0.0503    | 0.1246    | 0.0715    | 0.0451    | 0.0947    | 0.0456    | 0.0802    |
| 0.1066    | 0.1534    | 0.1346    | 0.0525    | 0.1408    | 0.2409    | 0.2529    | 0.2392    | 0.307     |
| 0         | 0.0031    | 0.0094    | 0.0035    | 0.0019    | 0         | 0.0024    | 0         | 0         |
| 0.0109    | 0.0711    | 0.047     | 0.0292    | 0.0463    | 0.0447    | 0.0833    | 0.0559    | 0.0316    |
| 0.2095    | 0.1562    | 0.2231    | 0.1653    | 0.2154    | 0.192     | 0.2513    | 0.2728    | 0.2889    |
| 0.0624    | 0.0442    | 0.0399    | 0.016     | 0.0488    | 0.0404    | 0.0648    | 0.0523    | 0.071     |
| 0.0077    | 0         | 0.0182    | 0         | 0         | 0.0092    | 0.0354    | 0.0119    | 0         |
| 0.1482    | 0.1126    | 0.0487    | 0.1611    | 0.0918    | 0.1445    | 0.0479    | 0.1229    | 0.0988    |
| 0.0771    | 0.0916    | 0.0772    | 0.0979    | 0.0882    | 0.055     | 0.0549    | 0.0451    | 0.0189    |



|        |        |        |        |        |          |        |        |        |
|--------|--------|--------|--------|--------|----------|--------|--------|--------|
| 0.0052 | 0.0034 | 0.0043 | 0.0039 | 0.0042 | 0.0047   | 0      | 0.0055 | 0.0064 |
| 0      | 0      | 0      | 0      | 0.0045 | 9.00E-04 | 0      | 0.0028 | 0.0083 |
| 0.0818 | 0.1732 | 0.1613 | 0.1968 | 0.132  | 0.0807   | 0.053  | 0.0643 | 0.0488 |
| 0.01   | 0.0043 | 0      | 0.0123 | 0      | 0        | 0      | 0      | 0      |
| 0.2308 | 0.0855 | 0.1423 | 0.1251 | 0.1222 | 0.1421   | 0.1704 | 0.178  | 0.1995 |
| 0      | 0.031  | 0.0175 | 0.037  | 0.0396 | 0.0139   | 0.035  | 0.0144 | 0      |
| 0      | 0.0546 | 0.0378 | 0.0304 | 0.0358 | 0.0267   | 0.0264 | 0.0394 | 0.0488 |
| 0.0496 | 0      | 0.013  | 0      | 0.004  | 0        | 0.0083 | 0      | 0      |
| 0.0523 | 0.0376 | 0.085  | 0.0529 | 0.0347 | 0.0194   | 0.0498 | 0.012  | 0.0311 |
| 0.0036 | 0      | 0.0059 | 0.0036 | 0.0029 | 0.0209   | 0.0043 | 0.021  | 0.0387 |
| 0.0738 | 0.0709 | 0.0568 | 0.0368 | 0.0746 | 0.0872   | 0.0595 | 0.0552 | 0.0566 |
| 0.1137 | 0.051  | 0.0286 | 0.0219 | 0.0764 | 0.0899   | 0.0657 | 0.0896 | 0.0913 |
| 0.1235 | 0.095  | 0.1626 | 0.131  | 0.1204 | 0.1051   | 0.1639 | 0.099  | 0.0221 |
| 0.0087 | 0      | 0.027  | 0.0196 | 0.0023 | 0.004    | 0.0313 | 0      | 0      |
| 0.0135 | 0      | 0      | 0      | 0      | 0        | 0.0142 | 0      | 0      |
| 0.5195 | 0.5127 | 0.5226 | 0.5065 | 0.5585 | 0.4736   | 0.5382 | 0.5259 | 0.4915 |
| 0.0354 | 0.0168 | 0.0331 | 0.0158 | 0.0153 | 0.0362   | 0.0166 | 0.0047 | 0.0182 |
| 0.5549 | 0.5296 | 0.5557 | 0.5222 | 0.5738 | 0.5098   | 0.5548 | 0.5306 | 0.5098 |

| GSM110094 | GSM110095 | GSM110095 |
|-----------|-----------|-----------|-----------|-----------|-----------|-----------|-----------|-----------|
| 0         | 0.0332    | 0         | 0.0123    | 0.018     | 0         | 0         | 0         | 0.0219    |
| 0         | 0         | 0         | 0         | 0         | 0         | 0         | 0         | 0         |
| 0.2339    | 0.1134    | 0.2324    | 0.1175    | 0.1357    | 0.0723    | 0.1237    | 0.1113    | 0.1237    |
| 0         | 0         | 0         | 0         | 0.002     | 0         | 0         | 0         | 0         |
| 0.1807    | 0.1478    | 0.1698    | 0.1995    | 0.1919    | 0.1337    | 0.1123    | 0.1118    | 0.1113    |
| 0.0968    | 0.0961    | 0.133     | 0.1029    | 0.1307    | 0.1231    | 0.1072    | 0.0821    | 0.0452    |
| 0.079     | 0.0889    | 0.0795    | 0.0524    | 0.1026    | 0.0551    | 0.0782    | 0.0409    | 0.0279    |
| 0.2781    | 0.2596    | 0.2353    | 0.2648    | 0.2345    | 0.167     | 0.1617    | 0.1616    | 0.1439    |
| 0.0757    | 0.0259    | 0.0681    | 0.0848    | 0.0547    | 0.0634    | 0.0201    | 0.0586    | 0.0335    |
| 0.205     | 0.1682    | 0.1575    | 0.1773    | 0.1156    | 0.1423    | 0.0982    | 0.1232    | 0.0503    |
| 0.1142    | 0.0806    | 0.0634    | 0.1111    | 0.022     | 0.0514    | 0.0339    | 0.0466    | 0.0371    |
| 0.0918    | 0.1532    | 0.1474    | 0.0457    | 0.1201    | 0.0604    | 0.0351    | 0.0224    | 0.0069    |
| 0.0735    | 0.0529    | 0.0532    | 0.102     | 0.0458    | 0.1108    | 0.1064    | 0.0892    | 0.0419    |
| 0.0888    | 0.1231    | 0.0858    | 0.1173    | 0.0613    | 0.0867    | 0.0512    | 0.1059    | 0.0973    |
| 0         | 0.0134    | 0         | 0         | 0.0061    | 0         | 0         | 0         | 0.0158    |
| 0.0228    | 0         | 0         | 0.0034    | 0         | 0         | 0         | 0         | 0         |
| 0.1849    | 0.0909    | 0.0849    | 0.1087    | 0.179     | 0.0889    | 0.0327    | 0.1235    | 0.0691    |
| 0         | 0.0039    | 0.0098    | 0.0076    | 0         | 0         | 0         | 0         | 0.0277    |
| 0.0022    | 0.0078    | 2.00E-04  | 0.0165    | 0         | 0.0095    | 0         | 0         | 0.0032    |
| 0         | 0.0903    | 0.0674    | 0.0226    | 0.2117    | 0.2477    | 0.2225    | 0.3114    | 0.2311    |
| 0.0278    | 0.0353    | 0.0428    | 0.0246    | 0.0478    | 0.0518    | 0.0591    | 0.0487    | 0.0478    |
| 0.0646    | 0.1092    | 0.1303    | 0.0752    | 0.1607    | 0.1731    | 0.0992    | 0.1446    | 0.0836    |
| 0.0126    | 0.0173    | 0         | 0.0237    | 0         | 0         | 0         | 0         | 0.0343    |
| 0         | 0         | 0         | 0         | 0         | 0         | 0         | 0         | 0.0051    |
| 0.0045    | 0.0264    | 0.0441    | 0.0302    | 0.0561    | 0.0276    | 0         | 0.0375    | 0.013     |
| 0.0128    | 0.0053    | 0.0084    | 0.016     | 0.0039    | 0         | 0.0209    | 0.0058    | 0.0022    |
| 0.0142    | 0.0079    | 0.0132    | 0.0086    | 0.0291    | 0.0106    | 8.00E-04  | 0         | 0         |
| 0.0168    | 0.0038    | 0.0538    | 0         | 0         | 0.0522    | 0.0036    | 0         | 0.015     |
| 0         | 0.0383    | 0.0132    | 0         | 0.0461    | 0.0194    | 0.059     | 0         | 0.0376    |
| 0.1411    | 0.1015    | 0.1786    | 0.0523    | 0.2631    | 0.3325    | 0.2123    | 0.1026    | 0.131     |
| 0.0015    | 0.0494    | 0.0225    | 0.0352    | 0.0253    | 0.0293    | 0.0584    | 0.0208    | 0.0462    |
| 0         | 0.0183    | 0.0087    | 0.0094    | 0         | 0.0181    | 0.0123    | 0.0145    | 0.0128    |
| 0         | 0         | 0         | 0.0041    | 0         | 0         | 0.0561    | 0.0276    | 0         |
| 0         | 0.0034    | 0.0043    | 7.00E-04  | 0.0185    | 0.0061    | 0.0022    | 0         | 0.0126    |
| 0.0951    | 0.1627    | 0.1519    | 0.1491    | 0.123     | 0.2712    | 0.1689    | 0.1161    | 0.2656    |
| 0.0111    | 0.0155    | 0.0051    | 0.0228    | 0.0191    | 0.0172    | 0.0019    | 0.0107    | 0.0125    |
| 0.1189    | 0.046     | 0.1031    | 0.0535    | 0.0618    | 0.026     | 0.0603    | 0.0422    | 0.0433    |
| 0         | 0         | 0         | 0         | 0.0019    | 0         | 0         | 0         | 0         |
| 0         | 0         | 0         | 0         | 0         | 0         | 0         | 0         | 0         |
| 0.0122    | 0.0051    | 0         | 0.0177    | 0.0035    | 0         | 0         | 0.007     | 0         |
| 0.1011    | 0.2034    | 0.2189    | 0.0927    | 0.1069    | 0.1368    | 0.0425    | 0.0642    | 0.0145    |
| 0.1093    | 0.1042    | 0.0474    | 0.0573    | 0.147     | 0.1919    | 0.3599    | 0.2576    | 0.2096    |
| 0.0069    | 0.0084    | 0.0091    | 0.0096    | 0         | 0         | 0         | 0         | 0         |
| 0.0179    | 0.0365    | 0.0067    | 0.0802    | 0.0661    | 0         | 0.0762    | 0.0152    | 0.0598    |
| 0.1914    | 0.254     | 0.3103    | 0.1996    | 0.2427    | 0.1969    | 0.2516    | 0.275     | 0.2836    |
| 0.0299    | 0.0444    | 0.0334    | 0.0444    | 0.0579    | 0.0479    | 0.0724    | 0.0454    | 0.0669    |
| 0.051     | 0.0681    | 0.0413    | 0.0271    | 0.0048    | 0.0575    | 0         | 0.0345    | 0         |
| 0.0765    | 0.0824    | 0.1172    | 0.107     | 0.0546    | 0.1527    | 0.0887    | 0.08      | 0.1728    |
| 0.0893    | 0.1058    | 0.0873    | 0.0958    | 0.0416    | 0.0604    | 0.0293    | 0.0718    | 0.0662    |

|        |        |          |        |        |          |          |        |        |
|--------|--------|----------|--------|--------|----------|----------|--------|--------|
| 0.0038 | 0.0034 | 0.0057   | 0.0058 | 0.007  | 0.0048   | 0.0052   | 0.0022 | 0.0065 |
| 0      | 0      | 0        | 0      | 0.0136 | 0.0034   | 4.00E-04 | 0.0102 | 0      |
| 0.1484 | 0.1482 | 0.1383   | 0.2    | 0.0166 | 0.0761   | 0.0815   | 0.1404 | 0.0221 |
| 0      | 0.0039 | 0.0046   | 0.0152 | 0      | 0.009    | 0        | 0.0031 | 0      |
| 0.2322 | 0.1761 | 0.2071   | 0.1135 | 0.1904 | 0.2227   | 0.1946   | 0.1929 | 0.1622 |
| 0.0143 | 0.0729 | 0.0263   | 0.0532 | 0      | 1.00E-04 | 0        | 0      | 0.0232 |
| 0.0435 | 0      | 0        | 0.0262 | 0.0251 | 0        | 0        | 0      | 0.0444 |
| 0.0215 | 0.0227 | 0        | 0      | 0      | 0.0142   | 0        | 0      | 0.0245 |
| 0.0776 | 0.0723 | 0.0718   | 0.0439 | 0.0345 | 0.0426   | 0.0381   | 0.0116 | 0.0509 |
| 0.0305 | 0      | 0.032    | 0.0035 | 0.0247 | 0.0148   | 0        | 0.0017 | 0.0199 |
| 0.082  | 0.0603 | 0.0342   | 0.0449 | 0.0941 | 0.0455   | 0.0071   | 0.0464 | 0.0579 |
| 0.0565 | 0.0667 | 0.0466   | 0.0324 | 0.0863 | 0.0927   | 0.0847   | 0.0589 | 0.062  |
| 0.1695 | 0.0778 | 0.2016   | 0.097  | 0.0948 | 0.0162   | 0.1002   | 0.058  | 0.1293 |
| 0.0511 | 0.042  | 0.0165   | 0.0598 | 0.008  | 0        | 0.003    | 0.0182 | 0      |
| 0.0197 | 0      | 0.0268   | 0.0015 | 0.0119 | 0.0026   | 0        | 0      | 0      |
| 0.4934 | 0.5442 | 0.5929   | 0.4889 | 0.5811 | 0.5121   | 0.4907   | 0.5053 | 0.4515 |
| 0.0074 | 0.0292 | 1.00E-04 | 0.0262 | 0.009  | 0.0048   | 0        | 0      | 0.0297 |
| 0.5008 | 0.5734 | 0.593    | 0.5151 | 0.5901 | 0.5169   | 0.4907   | 0.5053 | 0.4812 |

| GSM110095 |
|-----------|-----------|-----------|-----------|-----------|-----------|-----------|-----------|-----------|-----------|
| 0         | 0         | 0.007     | 0.0304    | 0         | 0.0208    | 0         | 0.0272    | 0         |           |
| 0         | 0         | 0         | 0         | 0         | 0         | 0         | 0         | 0         |           |
| 0.0868    | 0.026     | 0.1947    | 0.1163    | 0.116     | 0.1703    | 0.0608    | 0.1113    | 0         |           |
| 0         | 0.0123    | 0.0084    | 0         | 0         | 0.0096    | 0.0101    | 0         | 0         |           |
| 0.1008    | 0.1663    | 0.145     | 0.1847    | 0.0835    | 0.184     | 0.0901    | 0.0851    | 0         |           |
| 0.035     | 0.0622    | 0.0575    | 0.1319    | 0.0628    | 0.0651    | 0.078     | 0.0017    | 0.0104    |           |
| 0.0084    | 0.0283    | 0.1029    | 0.1104    | 0.0091    | 0.1107    | 0.0344    | 0.034     | 0         |           |
| 0.1322    | 0.2081    | 0.2172    | 0.2345    | 0.1203    | 0.2628    | 0.1654    | 0.153     | 0         |           |
| 0.047     | 0.0707    | 0.0127    | 0.0375    | 0.0098    | 0.0598    | 0.0143    | 0.0135    | 0         |           |
| 0.0995    | 0.1568    | 0.1555    | 0.1108    | 0.1478    | 0.1914    | 0.1052    | 0.1184    | 0         |           |
| 0.0359    | 0.0756    | 0.0786    | 0.074     | 0.0534    | 0.1179    | 0.0681    | 0.0679    | 0         |           |
| 0         | 0.0461    | 0.1248    | 0.0029    | 0.0784    | 0.1655    | 0.0457    | 0.0708    | 0         |           |
| 0.0776    | 0.0667    | 0.0344    | 0.0688    | 0.086     | 0.0436    | 0.0829    | 0.0259    | 3.00E-04  |           |
| 0.1071    | 0.0845    | 0.1172    | 0.0689    | 0.0851    | 0.12      | 0.0804    | 0.0964    | 0.0112    |           |
| 0.0256    | 0.0182    | 0         | 0         | 0.0108    | 0         | 0         | 0.0871    | 0.0273    |           |
| 0         | 0         | 0         | 0.0047    | 0         | 0.0125    | 0         | 0         | 0.033     |           |
| 0.1039    | 0.0378    | 0.1122    | 0.1376    | 0.0881    | 0.0426    | 0.0803    | 0.1315    | 0.0493    |           |
| 0         | 0.0092    | 0         | 0.0139    | 0         | 0.0271    | 0         | 0.0133    | 0         |           |
| 0.0011    | 0         | 0         | 0.0184    | 0.003     | 0.0118    | 0.0079    | 0.0101    | 0.0022    |           |
| 0.2571    | 0.3117    | 0.2054    | 0.0317    | 0.301     | 0.1321    | 0.1679    | 0.2822    | 0.3868    |           |
| 0.0558    | 0.0483    | 0.0413    | 0.0461    | 0.0475    | 0.0228    | 0.0466    | 0.0281    | 0.0611    |           |
| 0.092     | 0.1004    | 0.0559    | 0.1381    | 0.1525    | 0.0658    | 0.1388    | 0.0388    | 0         |           |
| 0.0425    | 0         | 0         | 0.0512    | 0         | 0         | 0         | 0.0439    | 0.0384    |           |
| 0.0365    | 0.0168    | 0.0151    | 0         | 0         | 0.0137    | 0         | 0.0188    | 0         |           |
| 0.0026    | 0         | 0         | 0.0035    | 0.0165    | 0         | 0.0043    | 0         | 0         |           |
| 0.0056    | 0.0093    | 0.011     | 0.0052    | 0.001     | 0.006     | 0.0029    | 0.0065    | 0         |           |
| 0.0036    | 0         | 0         | 0.0053    | 0         | 0         | 0.002     | 0         | 0.0159    |           |
| 0         | 0.028     | 0.0328    | 0.0362    | 0.0139    | 0.0428    | 0         | 0.038     | 0         |           |
| 0.071     | 0.0633    | 0.0416    | 0.0274    | 0.0758    | 0.0359    | 0.0508    | 0.0375    | 0.1004    |           |
| 0.1122    | 0.1884    | 0.3076    | 0.203     | 0.2404    | 0.0768    | 0.1778    | 0.1377    | 0.2784    |           |
| 0.058     | 0.0354    | 0.017     | 0.0545    | 0.0744    | 0.0346    | 0.0427    | 0.0677    | 0.0905    |           |
| 0.0143    | 0.0082    | 0.009     | 0.0157    | 0.0252    | 0.01      | 0.0121    | 0.0215    | 0.0149    |           |
| 0.0242    | 5.00E-04  | 0         | 0.0121    | 0.0141    | 0.0031    | 0.0066    | 0.0166    | 0.0649    |           |
| 0.0172    | 0.0182    | 0.0149    | 0         | 0.0114    | 0.0149    | 0.0068    | 0.0035    | 0         |           |
| 0.2535    | 0.13      | 0.1285    | 0.1169    | 0.2232    | 0.0694    | 0.2687    | 0.1291    | 0.2101    |           |
| 0.0186    | 0.0157    | 0.0145    | 0.0226    | 0.0128    | 0.0162    | 0.0136    | 0.0161    | 0.0235    |           |
| 0.0328    | 0         | 0.0881    | 0.0726    | 0.0409    | 0.0816    | 0.0114    | 0.0339    | 0         |           |
| 0         | 0         | 0         | 0.0053    | 0         | 0         | 0         | 0         | 0.009     |           |
| 0         | 0         | 0         | 0         | 0         | 0         | 0         | 0         | 0.0223    |           |
| 5.00E-04  | 0.007     | 0         | 0.0064    | 0         | 0.0063    | 0         | 0.0059    | 0         |           |
| 0.0356    | 0.097     | 0.1505    | 0         | 0.0943    | 0.2178    | 0.0816    | 0.0603    | 0         |           |
| 0.3128    | 0.1533    | 0.09      | 0.2579    | 0.2428    | 0.038     | 0.2679    | 0.2209    | 0.4033    |           |
| 0         | 5.00E-04  | 0.0028    | 0.003     | 0.003     | 0.0062    | 0         | 5.00E-04  | 0         |           |
| 0.0197    | 0.0319    | 0.0437    | 0.0723    | 0.037     | 0.0045    | 0.0503    | 0.0547    | 0.1549    |           |
| 0.1991    | 0.1868    | 0.2567    | 0.1819    | 0.1545    | 0.3043    | 0.193     | 0.2178    | 0.2296    |           |
| 0.0452    | 0.0535    | 0.0273    | 0.0745    | 0.0575    | 0.0385    | 0.0365    | 0.0566    | 0.0785    |           |
| 0.0246    | 0.0033    | 0.019     | 0.0273    | 0.009     | 0         | 0.0519    | 0.0279    | 0         |           |
| 0.1693    | 0.0864    | 0.0888    | 0.0525    | 0.138     | 0.0758    | 0.1712    | 0.0954    | 0         |           |
| 0.0705    | 0.0747    | 0.0661    | 0.0663    | 0.0457    | 0.0886    | 0.0605    | 0.0732    | 0         |           |

|        |        |        |        |        |        |        |        |        |
|--------|--------|--------|--------|--------|--------|--------|--------|--------|
| 0.0049 | 0.0032 | 0.0024 | 0.0042 | 0.0016 | 0.0046 | 0.0033 | 0.0028 | 0.004  |
| 0      | 0.0037 | 0.0041 | 0      | 0      | 0      | 0      | 0      | 0.0125 |
| 0.1037 | 0.1252 | 0.1004 | 0.0472 | 0.062  | 0.1818 | 0.1272 | 0.1026 | 0      |
| 0      | 0      | 0      | 0      | 0      | 0.0325 | 0.0022 | 0.0056 | 0      |
| 0.129  | 0.1267 | 0.1985 | 0.1779 | 0.2138 | 0.1897 | 0.1892 | 0.2033 | 0.0861 |
| 0.0509 | 0.0238 | 0.0247 | 0      | 0.0129 | 0.029  | 0.0036 | 0.0309 | 0      |
| 0.0397 | 0.0616 | 0.0128 | 0.0537 | 0      | 0      | 0.0172 | 0.0351 | 0.041  |
| 0      | 0      | 0      | 0.0433 | 0.0024 | 0.0147 | 0.007  | 0      | 0      |
| 0.0431 | 0.0419 | 0.0363 | 0.0664 | 0.0449 | 0.0999 | 0.0444 | 0.061  | 0      |
| 0.0109 | 0.0463 | 0      | 0.0145 | 0.0156 | 0.0236 | 0      | 0.0308 | 0      |
| 0.075  | 0.0346 | 0.0674 | 0.0779 | 0.023  | 0.0314 | 0.0648 | 0.0679 | 0.0698 |
| 0.08   | 0.0373 | 0.07   | 0.0853 | 0.0643 | 0.0667 | 0.066  | 0.076  | 0.0988 |
| 0.0569 | 0.034  | 0.1455 | 0.0749 | 0.1035 | 0.1732 | 0.0372 | 0.0722 | 0      |
| 0.019  | 0.033  | 0.0047 | 0.0872 | 0      | 0.0194 | 0.0224 | 0.0035 | 0      |
| 0      | 0      | 0.01   | 0.0045 | 0      | 0      | 0      | 0      | 0      |
| 0.4498 | 0.5683 | 0.6178 | 0.3895 | 0.5769 | 0.6511 | 0.4036 | 0.531  | 0.4363 |
| 0.0218 | 0      | 0.0035 | 0.05   | 0.0015 | 0.0163 | 0.004  | 0.0406 | 0.0203 |
| 0.4716 | 0.5683 | 0.6213 | 0.4395 | 0.5784 | 0.6674 | 0.4076 | 0.5716 | 0.4566 |

| GSM11009€ |
|-----------|-----------|-----------|-----------|-----------|-----------|-----------|-----------|-----------|-----------|
| 0.0283    | 0         | 0.0186    | 0         | 0.0109    | 0         | 0         | 0.002     | 0         |           |
| 0         | 0         | 0         | 0         | 0         | 0         | 0         | 0         | 0         |           |
| 0.1125    | 0.0915    | 0         | 0.205     | 0         | 0.0773    | 0.1234    | 0.0665    | 0.1567    |           |
| 0         | 0         | 0         | 0.0133    | 0.0398    | 0         | 0         | 0.0343    | 0.0044    |           |
| 0.0921    | 0.0362    | 0.0632    | 0.128     | 0.0699    | 0.1304    | 0.1996    | 0.0595    | 0.145     |           |
| 0.0151    | 0.0588    | 0.0409    | 0.0675    | 0.0548    | 0.0716    | 0.1303    | 0.0437    | 0.0927    |           |
| 0.0349    | 0         | 0.0373    | 0.0395    | 0.0235    | 0.0674    | 0.0807    | 0.0775    | 0.0571    |           |
| 0.142     | 0.0894    | 0.1443    | 0.206     | 0.1082    | 0.1816    | 0.2728    | 0.1       | 0.1779    |           |
| 0.0358    | 0         | 0         | 0.044     | 0         | 0.0572    | 0.111     | 0.0206    | 0.0851    |           |
| 0.1149    | 0.0585    | 0.0442    | 0.1015    | 0.0206    | 0.1528    | 0.179     | 0.1089    | 0.1338    |           |
| 0.0408    | 0.0108    | 0         | 0.0393    | 0         | 0.0812    | 0.082     | 0.0238    | 0.0561    |           |
| 0         | 0         | 0         | 0.0699    | 0.0081    | 0.0851    | 0.0856    | 0.103     | 0.0606    |           |
| 0.0953    | 0.0941    | 0.0651    | 0.064     | 0.1027    | 0.0749    | 0.0631    | 0.0669    | 0.0753    |           |
| 0.0974    | 0.0321    | 0.0961    | 0.0874    | 0.0532    | 0.0788    | 0.1067    | 0.0686    | 0.082     |           |
| 0.0398    | 0.1025    | 0.1551    | 0         | 0.0435    | 0         | 0.0188    | 0         | 0         |           |
| 0.0215    | 0.0334    | 0.0041    | 0         | 0         | 0         | 0.0353    | 0         | 0         |           |
| 0.0685    | 0.1217    | 0         | 0.1367    | 0.0552    | 0.0615    | 0.1401    | 0.074     | 0.0987    |           |
| 0         | 0         | 0         | 0         | 0         | 0.0076    | 5.00E-04  | 0         | 0         |           |
| 0         | 0         | 0         | 0         | 0.0108    | 0         | 0.0247    | 0.0374    | 7.00E-04  |           |
| 0.2897    | 0.2799    | 0.2961    | 0.1353    | 0.2892    | 0.3991    | 0.0495    | 0.2479    | 0.1245    |           |
| 0.0352    | 0.0462    | 0.0462    | 0.0416    | 0.0565    | 0.0547    | 0.0443    | 0.0629    | 0.0443    |           |
| 0.0948    | 0         | 0.0623    | 0.1304    | 0.0729    | 0.1006    | 0.009     | 0.1107    | 0.0729    |           |
| 0         | 0         | 0.0266    | 0         | 0.0064    | 0         | 0         | 1.00E-04  | 0         |           |
| 0.018     | 0         | 0.0593    | 0         | 0.012     | 0         | 0         | 0         | 0         |           |
| 0.0282    | 0         | 0         | 0.059     | 0         | 0         | 0         | 0         | 0.0103    |           |
| 0.0046    | 0         | 0.006     | 0.006     | 0.0014    | 8.00E-04  | 0.0043    | 0.0133    | 0.0112    |           |
| 0.0032    | 0         | 0         | 0.0106    | 0.0184    | 0         | 0.0034    | 0         | 0.0123    |           |
| 0         | 0         | 0         | 0         | 0         | 0         | 0.0501    | 0.0179    | 0         |           |
| 0.0624    | 0.189     | 0.2309    | 0.0161    | 0.1852    | 0.0506    | 0         | 0.0602    | 0.0248    |           |
| 0.1034    | 0.1577    | 0.0015    | 0.1216    | 0.2803    | 0.1923    | 0.1789    | 0.131     | 0.2448    |           |
| 0.0534    | 0.0474    | 0.102     | 0.0425    | 0.0533    | 0.0263    | 0.0282    | 0.0902    | 0.0393    |           |
| 0.0063    | 0.007     | 0.012     | 0.0135    | 0.009     | 0.0056    | 0.0039    | 0.0131    | 0.0179    |           |
| 0.0216    | 0.0095    | 0.0465    | 0         | 0.0646    | 0         | 0.0065    | 0.042     | 0.0073    |           |
| 0.0128    | 0.0024    | 0.0126    | 0.0171    | 0.0161    | 0.0053    | 0         | 0.0127    | 0.0039    |           |
| 0.1958    | 0.2669    | 0.1387    | 0.1989    | 0.3275    | 0.1154    | 0.0776    | 0.1825    | 0.2074    |           |
| 0.0076    | 0.0157    | 0.0124    | 0.0188    | 0.0164    | 0.0145    | 0.0106    | 0.0124    | 0.0066    |           |
| 0.0492    | 0.0136    | 0         | 0.0916    | 0         | 0.0069    | 0.0553    | 0.0169    | 0.0829    |           |
| 0         | 0         | 0         | 0         | 0         | 0         | 0         | 0         | 0         |           |
| 0         | 0         | 0         | 0         | 0         | 0         | 0         | 0         | 0         |           |
| 0.0038    | 0         | 0.0039    | 0.0019    | 0         | 0         | 0         | 0         | 0         |           |
| 0.0623    | 0.0227    | 0.0271    | 0.1486    | 0.0801    | 0.1003    | 0.1053    | 0.0822    | 0.0774    |           |
| 0.1511    | 0.3696    | 0.2699    | 0.1182    | 0.2317    | 0.1864    | 0.2623    | 0.3136    | 0.2417    |           |
| 0         | 7.00E-04  | 0.0012    | 0.0062    | 0         | 0         | 0.0086    | 0         | 0.0041    |           |
| 0.0626    | 0.0799    | 0.1034    | 0.0279    | 0.0692    | 0.0338    | 0.0649    | 0.07      | 0.0624    |           |
| 0.2066    | 0.1335    | 0.2184    | 0.2529    | 0.1979    | 0.2385    | 0.2912    | 0.2824    | 0.2494    |           |
| 0.0406    | 0.0467    | 0.0338    | 0.0361    | 0.0416    | 0.0458    | 0.0642    | 0.0741    | 0.0404    |           |
| 0         | 0.0405    | 0         | 0.0091    | 0         | 0         | 0         | 0.0066    | 0.0146    |           |
| 0.1281    | 0.1703    | 0.0785    | 0.1437    | 0.1792    | 0.085     | 0.0213    | 0.1248    | 0.1259    |           |
| 0.0579    | 0.0328    | 0.0652    | 0.0853    | 0.0262    | 0.056     | 0.0745    | 0.0412    | 0.0477    |           |

|        |          |        |        |        |        |        |        |          |
|--------|----------|--------|--------|--------|--------|--------|--------|----------|
| 0.0034 | 4.00E-04 | 0      | 0.0054 | 0.0045 | 0.0037 | 0.004  | 0.0041 | 0.0043   |
| 0.0031 | 0        | 0.0074 | 0      | 0.0132 | 0      | 0      | 0.0017 | 0.0065   |
| 0.1413 | 0.0206   | 0.1023 | 0.1422 | 0.0132 | 0.0865 | 0.123  | 0.0707 | 0.0772   |
| 0      | 0        | 0      | 0      | 0      | 0.0049 | 0      | 0      | 0        |
| 0.0998 | 0.0879   | 0.0904 | 0.1139 | 0.1398 | 0.1694 | 0.2157 | 0.1997 | 0.1907   |
| 0.0282 | 0.0489   | 0.0598 | 0.033  | 0      | 0.0215 | 0.0075 | 0.0175 | 0.0098   |
| 0.0181 | 0.04     | 0.0245 | 0.0197 | 0.0482 | 0.0126 | 0.0418 | 0      | 0        |
| 0      | 0        | 0      | 0      | 0      | 0      | 0.0164 | 0      | 0        |
| 0.0378 | 0        | 0.0051 | 0.0544 | 0.0331 | 0.0114 | 0.0824 | 0      | 0.0454   |
| 0.014  | 0        | 0      | 0.0228 | 0.0232 | 0.0649 | 0      | 0      | 0.0058   |
| 0.0423 | 0.0563   | 0.0666 | 0.0725 | 0.0477 | 0.0665 | 0.068  | 0.0731 | 0.0492   |
| 0.0529 | 0.0365   | 0.0416 | 0.0544 | 0.0535 | 0.0871 | 0.0791 | 0.1239 | 0.058    |
| 0.0912 | 0.0775   | 0      | 0.1619 | 0      | 0.0938 | 0.0886 | 0.0582 | 0.1397   |
| 0      | 0        | 0      | 0.0175 | 0.0219 | 0      | 0.0227 | 0      | 0.0436   |
| 0      | 0.0088   | 0      | 0.0087 | 0.0143 | 0      | 0      | 0      | 0.0052   |
| 0.5335 | 0.4123   | 0.4324 | 0.5373 | 0.3989 | 0.6219 | 0.5003 | 0.4919 | 0.4953   |
| 0.0142 | 0        | 0.0226 | 0      | 0.014  | 0      | 0.0124 | 0.0198 | 4.00E-04 |
| 0.5477 | 0.4123   | 0.455  | 0.5373 | 0.413  | 0.6219 | 0.5126 | 0.5117 | 0.4957   |

| GSM110097 |
|-----------|-----------|-----------|-----------|-----------|-----------|-----------|-----------|-----------|
| 0.0034    | 0         | 0.0154    | 0.0017    | 0         | 0         | 0.0012    | 0         | 0         |
| 0         | 0         | 0         | 0         | 0         | 0         | 0         | 0         | 0         |
| 0.1314    | 0.1323    | 0.1988    | 0.1394    | 0         | 0.2136    | 0.1111    | 0.0948    | 0.111     |
| 0         | 0         | 0.0497    | 0         | 0         | 0.0083    | 0         | 0         | 0         |
| 0.0881    | 0.1807    | 0.0829    | 0.2155    | 0.053     | 0.083     | 0.1067    | 0.2025    | 0.128     |
| 0.0176    | 0.0565    | 0.074     | 0.1141    | 0.0644    | 0.0512    | 0.0735    | 0.113     | 0.0626    |
| 0.02      | 0.0756    | 0.0338    | 0.0566    | 0         | 0.0341    | 0.0761    | 0.1209    | 0.0438    |
| 0.1362    | 0.2601    | 0.1356    | 0.2477    | 0.0808    | 0.1318    | 0.1775    | 0.2737    | 0.1811    |
| 0.0074    | 0.0412    | 0         | 0.1359    | 0         | 0.0321    | 0         | 0.08      | 0.0465    |
| 0.088     | 0.1738    | 0.0634    | 0.2295    | 0.0179    | 0.0308    | 0.0646    | 0.1519    | 0.1219    |
| 0.0472    | 0.0986    | 0         | 0.1178    | 0         | 0         | 0.0107    | 0.0837    | 0.0674    |
| 0.0034    | 0.2033    | 0         | 0.1951    | 0         | 0.017     | 0.0488    | 0.1036    | 0.0867    |
| 0.0663    | 0.0169    | 0.065     | 0.031     | 0.0379    | 0.08      | 0.0441    | 0.0537    | 0.0703    |
| 0.0991    | 0.1236    | 0.068     | 0.0937    | 0.0493    | 0.0804    | 0.1033    | 0.1243    | 0.1022    |
| 0         | 0         | 0.0214    | 0         | 0.0045    | 0         | 4.00E-04  | 0         | 0.011     |
| 0         | 0         | 0         | 0         | 0.0119    | 0         | 0         | 0.002     | 0         |
| 0.082     | 0.1273    | 0.1244    | 0.0596    | 0.0412    | 0.1317    | 0.128     | 0.1222    | 0.076     |
| 0         | 0.0139    | 0         | 0.0245    | 0         | 0         | 0         | 0         | 0         |
| 0         | 0         | 0.0362    | 0.0166    | 0.0344    | 0.0103    | 0         | 0.0192    | 0         |
| 0.238     | 0.0712    | 0.2415    | 0.2748    | 0.3306    | 0.2805    | 0.1866    | 0.1142    | 0.2823    |
| 0.0464    | 0.0346    | 0.0385    | 0.0276    | 0.0458    | 0.0504    | 0.0456    | 0.049     | 0.0505    |
| 0.0643    | 0.0655    | 0.1142    | 0.1019    | 0.0885    | 0.0921    | 0.1275    | 0         | 0.0732    |
| 0.024     | 0.0706    | 0         | 0         | 0.0369    | 0.0252    | 0.0788    | 0.0117    | 0.0262    |
| 0         | 0         | 0         | 0         | 0         | 0         | 0         | 0         | 0.0118    |
| 0.0094    | 0         | 0.0306    | 0         | 0.0055    | 0         | 0.0241    | 0         | 0         |
| 0.0162    | 0.0103    | 0.0016    | 0.0051    | 0         | 0         | 0.0039    | 0.0099    | 0.0014    |
| 0         | 0         | 0.0052    | 0         | 0.0037    | 0         | 0.0036    | 0.0207    | 0.0048    |
| 0         | 0.1061    | 0         | 0.0656    | 0         | 0         | 0         | 0.0422    | 0         |
| 0.0298    | 0         | 0.0497    | 0         | 0.1054    | 0.0658    | 0.007     | 0         | 0.0355    |
| 0.1514    | 0.1207    | 0.1079    | 0.2867    | 0.1683    | 0.1266    | 0.0897    | 0.1655    | 0.0878    |
| 0.0606    | 0.0547    | 0.0485    | 0.011     | 0.0644    | 0.0248    | 0.0505    | 0.0473    | 0.0456    |
| 0.0146    | 0.0185    | 0.0133    | 0         | 0.014     | 0.0026    | 0.0147    | 0.0196    | 0.0182    |
| 0.0395    | 0.0097    | 0.0074    | 0         | 0.023     | 0         | 0.0372    | 0         | 0.0233    |
| 8.00E-04  | 0.0098    | 0.0039    | 0.0079    | 0.0018    | 0.0203    | 0         | 0         | 0.0129    |
| 0.1991    | 0.048     | 0.2746    | 0.0767    | 0.2634    | 0.2856    | 0.1326    | 0.1314    | 0.204     |
| 0.0139    | 0.0092    | 0.0075    | 0.0064    | 0.0167    | 0.0157    | 0.0152    | 0.014     | 0.0197    |
| 0.0495    | 0.0513    | 0.0843    | 0.0498    | 0         | 0.0732    | 0.0269    | 0.0401    | 0.0334    |
| 0         | 0         | 0         | 0         | 0         | 0         | 0         | 0         | 0         |
| 0         | 0         | 0         | 0         | 0         | 0         | 0         | 0         | 0         |
| 0.0031    | 0         | 0.0061    | 0         | 0         | 0         | 0.0019    | 0         | 0         |
| 0.0592    | 0.2134    | 0.0603    | 0.1626    | 0         | 0.1062    | 0.1056    | 0.1346    | 0.1124    |
| 0.2496    | 0.0999    | 0.1767    | 0.0627    | 0.2914    | 0.2723    | 0.2132    | 0.1131    | 0.1731    |
| 0         | 0.0057    | 0         | 0         | 0         | 0         | 0.0044    | 0.0067    | 0         |
| 0.0625    | 0.0117    | 0.0621    | 0         | 0.135     | 0.0361    | 0.0613    | 0.032     | 0.0267    |
| 0.2134    | 0.2948    | 0.1676    | 0.3132    | 0.1982    | 0.2821    | 0.1902    | 0.2646    | 0.2328    |
| 0.0514    | 0.0511    | 0.0324    | 0.0523    | 0.0617    | 0.0676    | 0.0536    | 0.0469    | 0.0512    |
| 0.0034    | 0.048     | 0.0173    | 0         | 0.0244    | 0.0219    | 0.03      | 0.0193    | 0.0112    |
| 0.1107    | 0.0373    | 0.1726    | 0.0368    | 0.1219    | 0.1624    | 0.099     | 0.093     | 0.1315    |
| 0.059     | 0.1053    | 0.0467    | 0.0675    | 0.024     | 0.0549    | 0.0693    | 0.0943    | 0.0999    |



|        |        |        |        |        |        |        |          |        |
|--------|--------|--------|--------|--------|--------|--------|----------|--------|
| 0.0034 | 0.0037 | 0.0041 | 0.0043 | 0.0032 | 0.0028 | 0.0046 | 0.0044   | 0.0042 |
| 0      | 0.0042 | 0.0088 | 0      | 0.0042 | 0      | 0      | 3.00E-04 | 0.0015 |
| 0.0886 | 0.1447 | 0.0708 | 0.0678 | 0.0082 | 0.0963 | 0.1141 | 0.1555   | 0.1081 |
| 0      | 0.0333 | 0      | 0.0095 | 0      | 0      | 0      | 0.018    | 0      |
| 0.1375 | 0.2632 | 0.0865 | 0.261  | 0.0868 | 0.1692 | 0.0904 | 0.1975   | 0.1689 |
| 0.0135 | 0.0938 | 0.0469 | 0.0386 | 0.0038 | 0.0074 | 0.0589 | 0.0112   | 0.0224 |
| 0.0698 | 0.0257 | 0.0302 | 0      | 0.0452 | 0.0222 | 0.0327 | 0.0129   | 0.0399 |
| 0      | 0      | 0      | 0.0101 | 0      | 0      | 0.0011 | 0.0112   | 0      |
| 0.0343 | 0.0701 | 0.0017 | 0.0157 | 0.0098 | 0.0081 | 0.0263 | 0.0701   | 0.0353 |
| 0.0286 | 0      | 0      | 0.0704 | 0      | 0.0222 | 0.0059 | 0.0147   | 0.0424 |
| 0.0091 | 0.0436 | 0.056  | 0.0834 | 0.1084 | 0.0699 | 0.0126 | 0.0667   | 0.0591 |
| 0.0468 | 0.069  | 0.0893 | 0.1294 | 0.1033 | 0.0733 | 0.0166 | 0.083    | 0.0585 |
| 0.1202 | 0.1173 | 0.1509 | 0.1401 | 0      | 0.1691 | 0.0855 | 0.0846   | 0.1069 |
| 0.0182 | 0.0268 | 0.0096 | 0.0031 | 0      | 0      | 0.0336 | 0.0245   | 0      |
| 0      | 0      | 0.0084 | 0      | 0      | 0.0065 | 0      | 0        | 0      |
| 0.4857 | 0.5743 | 0.5076 | 0.7101 | 0.4018 | 0.5302 | 0.4576 | 0.5182   | 0.5605 |
| 0.0137 | 0.0353 | 0.0258 | 0.0092 | 0.0356 | 0.0178 | 0.04   | 0.0154   | 0.0131 |
| 0.4994 | 0.6096 | 0.5334 | 0.7193 | 0.4374 | 0.548  | 0.4976 | 0.5336   | 0.5736 |

| GSM110097 | GSM110098 |
|-----------|-----------|-----------|-----------|-----------|-----------|-----------|-----------|-----------|
| 0         | 0.0104    | 0         | 7.00E-04  | 0.0011    | 0.0221    | 0.0143    | 0         | 0.0118    |
| 0         | 0         | 0         | 0         | 0         | 0         | 0         | 0         | 0         |
| 0.2093    | 0.143     | 0.1585    | 0.0569    | 0.0905    | 0.0929    | 0         | 0.0304    | 0.1257    |
| 0.0174    | 0         | 0         | 0         | 0         | 0         | 0         | 0         | 0.0134    |
| 0.0572    | 0.166     | 0.1035    | 0.1026    | 0.1071    | 0.1274    | 0.2253    | 0.2138    | 0.1411    |
| 0.0071    | 0.095     | 0.097     | 0.0944    | 0.058     | 0.0276    | 0.1193    | 0.1636    | 0.0666    |
| 0.0349    | 0.0793    | 0.0626    | 0.0561    | 0.045     | 0.0358    | 0.0632    | 0.032     | 0.0196    |
| 0.1531    | 0.2371    | 0.1719    | 0.1857    | 0.1832    | 0.1708    | 0.3053    | 0.2407    | 0.1629    |
| 0         | 0.1008    | 0.0456    | 0         | 0         | 0.0464    | 0.0736    | 0.1527    | 0.0598    |
| 0.0831    | 0.14      | 0.1312    | 0.1008    | 0.064     | 0.1514    | 0.1573    | 0.2006    | 0.1397    |
| 0.0289    | 0.0707    | 0.0391    | 0.0305    | 0.0197    | 0.0798    | 0.0932    | 0.085     | 0.0729    |
| 0.1014    | 0.08      | 0         | 0.0915    | 0.0685    | 0.0981    | 0.1171    | 0.0443    | 0.005     |
| 0.0574    | 0.0423    | 0.1012    | 0.064     | 0.08      | 0.0282    | 0.0922    | 0.0919    | 0.0786    |
| 0.085     | 0.0852    | 0.0847    | 0.0945    | 0.0963    | 0.0793    | 0.1437    | 0.1066    | 0.1234    |
| 0         | 0         | 0         | 0.0081    | 0.0167    | 0.0257    | 0         | 0         | 0.0188    |
| 0         | 0         | 0         | 0         | 0         | 0         | 0         | 0         | 0         |
| 0.1476    | 0.0857    | 0.1467    | 0.0421    | 0.0653    | 0.1119    | 0         | 0.0503    | 0.0501    |
| 0.0274    | 0         | 0         | 0         | 0.0019    | 0         | 0.0168    | 0         | 0         |
| 0.0098    | 0.0286    | 0.0043    | 0         | 0         | 0.0136    | 0         | 0.0332    | 0         |
| 0.273     | 0.2202    | 0.2266    | 0.2771    | 0.3094    | 0.291     | 0.1202    | 0.0296    | 0.1525    |
| 0.0396    | 0.0353    | 0.0495    | 0.05      | 0.0568    | 0.0441    | 0.0296    | 0.0439    | 0.0387    |
| 0.0904    | 0.0433    | 0.1047    | 0.114     | 0.0366    | 0.0119    | 0.1776    | 0.1691    | 0.0448    |
| 0.0582    | 0         | 0         | 0.0023    | 0.0132    | 0.0128    | 0.0391    | 0.0163    | 0.0167    |
| 0         | 0         | 0         | 0         | 0.0328    | 0.0143    | 0         | 0         | 0.019     |
| 0.0013    | 0         | 0         | 0.0274    | 0.0015    | 0         | 0.0614    | 0.0087    | 0.0272    |
| 0         | 0.0125    | 0         | 8.00E-04  | 0         | 0.0063    | 0.0145    | 0.0049    | 0.0186    |
| 0         | 0         | 0.0066    | 0         | 0.009     | 0.0118    | 0.0013    | 0.0121    | 0         |
| 0.0129    | 0.0444    | 0         | 0         | 0         | 0.0309    | 0.049     | 0.0784    | 0.0095    |
| 0.0678    | 0         | 0.0663    | 0.0426    | 0.0561    | 0.0584    | 0.0092    | 0.0251    | 0.017     |
| 0.0875    | 0.1651    | 0.1681    | 0.1141    | 0.1197    | 0.1646    | 0.1118    | 0.2323    | 0.0465    |
| 0.0429    | 0.0392    | 0.0125    | 0.0283    | 0.0514    | 0.0549    | 0.0333    | 0.0891    | 0.0397    |
| 0.0086    | 0.0099    | 0.0076    | 0.0091    | 0.0098    | 0.014     | 0.0195    | 0.0306    | 0.0054    |
| 0         | 0         | 0.0031    | 0         | 0.0249    | 0         | 0.012     | 0.0182    | 0.0131    |
| 0.0232    | 0.0089    | 0.0088    | 0.0155    | 0.0192    | 0.0109    | 0.0222    | 0         | 0.0164    |
| 0.2058    | 0.2065    | 0.2344    | 0.249     | 0.1863    | 0.1789    | 0.2277    | 0.2058    | 0.1119    |
| 0.0275    | 0.0186    | 0.0162    | 0.0221    | 0.0156    | 0.0179    | 0.0073    | 0.0214    | 0.0115    |
| 0.0819    | 0.0391    | 0.0521    | 0.0086    | 0.0024    | 0.0249    | 0         | 0.032     | 0.0435    |
| 0         | 0         | 0         | 0         | 0         | 0         | 0         | 0         | 0         |
| 0         | 0         | 0         | 0         | 0         | 0         | 0         | 0         | 0         |
| 0.0061    | 0         | 0         | 0.0018    | 0.0053    | 0         | 0.0228    | 0.0016    | 0.0159    |
| 0.153     | 0.1108    | 0.0518    | 0.1424    | 0.1264    | 0.1281    | 0.1578    | 5.00E-04  | 0.0335    |
| 0.1913    | 0.1203    | 0.3088    | 0.2581    | 0.1909    | 0.1628    | 0         | 0.1864    | 0.2051    |
| 0         | 0         | 0.0011    | 0         | 0.0087    | 0.0015    | 0.0045    | 0.0052    | 0.0076    |
| 0.0195    | 0.036     | 0.0106    | 0.0374    | 0.0271    | 0.052     | 0         | 0.0054    | 0.0904    |
| 0.2202    | 0.244     | 0.1799    | 0.1975    | 0.202     | 0.2981    | 0.1752    | 0.2703    | 0.2003    |
| 0.0531    | 0.0457    | 0.0331    | 0.0588    | 0.0537    | 0.0517    | 0.0282    | 0.027     | 0.0429    |
| 0.0348    | 0.0624    | 0.0335    | 0.0159    | 0         | 0.0203    | 0         | 0.0603    | 0.0055    |
| 0.1254    | 0.1221    | 0.1945    | 0.1537    | 0.1522    | 0.1051    | 0.1623    | 0.1447    | 0.0677    |
| 0.0852    | 0.0843    | 0.0675    | 0.0725    | 0.0704    | 0.0582    | 0.1101    | 0.0829    | 0.0713    |

|        |        |        |        |        |        |          |          |        |
|--------|--------|--------|--------|--------|--------|----------|----------|--------|
| 0.0021 | 0.0039 | 0.0067 | 0.0035 | 0.0042 | 0.0044 | 0.0064   | 0.0065   | 0.0012 |
| 0      | 0      | 0      | 0      | 0.0051 | 0.001  | 5.00E-04 | 7.00E-04 | 0      |
| 0.097  | 0.1235 | 0.1407 | 0.1346 | 0.139  | 0.0869 | 0.2254   | 0.1184   | 0.1798 |
| 0      | 0      | 0      | 0      | 0.0014 | 0.0029 | 0.0196   | 0        | 0      |
| 0.1689 | 0.174  | 0.196  | 0.2205 | 0.1394 | 0.1779 | 0.249    | 0.2122   | 0.1514 |
| 0.0506 | 0.0453 | 0.0058 | 0.0225 | 0.0269 | 0.0169 | 0        | 0        | 0.0314 |
| 0.0274 | 0      | 0.0425 | 0.0229 | 0.0403 | 0.0644 | 0        | 0.0045   | 0.0468 |
| 0.0286 | 0.0034 | 0.002  | 0.0029 | 0      | 0.0103 | 0.0414   | 0.0114   | 0      |
| 0.1009 | 0.0292 | 0.0174 | 0.0244 | 0.0221 | 0.0497 | 0.0641   | 0.0712   | 0.047  |
| 0.0326 | 0.0199 | 0.0172 | 0.0064 | 0.0512 | 0.0037 | 0.0055   | 0.004    | 0.0027 |
| 0.0598 | 0.1049 | 0.0633 | 0.0549 | 0.0401 | 0.0536 | 0.0357   | 0.0875   | 0      |
| 0.0616 | 0.1146 | 0.0793 | 0.0603 | 0.05   | 0.086  | 0.0278   | 0.0933   | 0.0135 |
| 0.1479 | 0.108  | 0.108  | 0.0595 | 0.0972 | 0.0339 | 0        | 0.005    | 0.1229 |
| 0      | 0      | 0.004  | 0      | 0      | 0.0098 | 0.0197   | 0.056    | 0.0105 |
| 0      | 0      | 0      | 0      | 0      | 0      | 0        | 0.003    | 0      |
| 0.5924 | 0.5761 | 0.469  | 0.5073 | 0.5313 | 0.6057 | 0.4886   | 0.3796   | 0.4927 |
| 0.034  | 0.0195 | 0.0022 | 0.0015 | 0.0072 | 0.0242 | 0.0267   | 0.0248   | 0.0142 |
| 0.6264 | 0.5956 | 0.4712 | 0.5088 | 0.5385 | 0.63   | 0.5153   | 0.4044   | 0.5069 |

| GSM110098 | GSM110098 | GSM110099 |
|-----------|-----------|-----------|-----------|-----------|-----------|-----------|-----------|-----------|
| 0.011     | 0.0306    | 0.0134    | 0.0117    | 0.0131    | 0.0017    | 0         | 0.0095    | 0         |
| 0         | 0         | 0         | 0         | 0         | 0         | 0         | 0         | 0         |
| 0.0582    | 0.0779    | 0.191     | 0.1043    | 0.1214    | 0         | 0.1055    | 0.185     | 0.1093    |
| 0         | 0.0411    | 0         | 0.0099    | 0.0305    | 0         | 0         | 0.0284    | 0         |
| 0.124     | 0.159     | 0.1889    | 0.1515    | 0.1284    | 0.0884    | 0.1014    | 0.1289    | 0.169     |
| 0.0205    | 0.0702    | 0.1503    | 0.1563    | 0.0185    | 0.0567    | 0.0251    | 0.0762    | 0.1006    |
| 0.0419    | 0.0581    | 0.0762    | 0.0934    | 0.0676    | 0.0299    | 0.0479    | 0.0323    | 0.0816    |
| 0.1886    | 0.2114    | 0.2573    | 0.2133    | 0.1553    | 0.1328    | 0.1148    | 0.2117    | 0.2185    |
| 0         | 0.0275    | 0.0604    | 0.0438    | 0.0724    | 0         | 0.0389    | 0.0041    | 0.0662    |
| 0.1233    | 0.1129    | 0.1177    | 0.0827    | 0.189     | 0.1065    | 0.1806    | 0.1171    | 0.1628    |
| 0.0738    | 0.0571    | 0.0594    | 0.0204    | 0.0958    | 0.0493    | 0.1079    | 0.0567    | 0.0779    |
| 0.0783    | 0.0377    | 0.0136    | 0.0294    | 0.1902    | 0.0341    | 0.0248    | 0         | 0         |
| 0.0609    | 0.0676    | 0.0656    | 0.0842    | 0.0385    | 0.0847    | 0.0692    | 0.1137    | 0.1302    |
| 0.1153    | 0.1019    | 0.1406    | 0.0908    | 0.0832    | 0.0806    | 0.058     | 0.0977    | 0.1012    |
| 0         | 0.021     | 0.0136    | 0.008     | 0         | 0.0366    | 0         | 0         | 0         |
| 0         | 0         | 0         | 0         | 0         | 0         | 0         | 0         | 0.0156    |
| 0.0276    | 0.0738    | 0.072     | 0.0796    | 0.1102    | 0         | 0.1048    | 0.0751    | 0.0684    |
| 0.0368    | 0         | 0.0028    | 0         | 0.0143    | 0         | 0         | 0.0187    | 0         |
| 0.0109    | 0         | 0         | 0.0193    | 0.0022    | 0.0093    | 0         | 0         | 0.0047    |
| 0.3712    | 0.3002    | 0.2272    | 0.1936    | 0.2479    | 0.2448    | 0.2329    | 0.0898    | 0.0955    |
| 0.0605    | 0.0349    | 0.0317    | 0.071     | 0.0566    | 0.048     | 0.0574    | 0.0307    | 0.0353    |
| 0.122     | 0.1305    | 0.1066    | 0.1261    | 0.0154    | 0.1369    | 0         | 0.2001    | 0.1646    |
| 0.0813    | 0.005     | 0         | 0.0668    | 0         | 0         | 0         | 0.0577    | 0.0104    |
| 0         | 0.0281    | 0.014     | 0.0088    | 0         | 0.0019    | 0         | 0         | 0         |
| 0.0268    | 0.0217    | 0         | 0         | 0         | 0         | 0.0408    | 0.0438    | 0.0023    |
| 0.0053    | 0.0122    | 0.0114    | 0.0086    | 0.0091    | 0.0109    | 0.0028    | 0.0101    | 0.0108    |
| 0.005     | 0         | 0         | 0.016     | 0.0064    | 0         | 0.0014    | 0         | 0.0027    |
| 0         | 0         | 0.011     | 0.0026    | 0.0742    | 0         | 0         | 0         | 0         |
| 0         | 0.0378    | 0.0148    | 0.055     | 0.0684    | 0.1115    | 0.0218    | 0         | 0.0235    |
| 0         | 0.0779    | 0.1603    | 0.227     | 0.2529    | 0.0916    | 0.1992    | 0         | 0.0871    |
| 0.0349    | 0.0352    | 0.0599    | 0.0445    | 0.0318    | 0.0618    | 0.048     | 0.0136    | 0.0472    |
| 0.0046    | 0.0147    | 0.0147    | 0.0182    | 0.0033    | 0.0204    | 0.0236    | 0.0062    | 0.0188    |
| 0.0067    | 0.0045    | 0.0139    | 0.0301    | 0         | 0.0273    | 0.0428    | 0         | 0.0172    |
| 0.0095    | 0.0176    | 0         | 0.0209    | 0.0104    | 0.0188    | 0         | 0.0112    | 0.0108    |
| 0.0691    | 0.1869    | 0.2138    | 0.2734    | 0.1637    | 0.2492    | 0.1873    | 0.2731    | 0.179     |
| 0.0195    | 0.0229    | 0.0169    | 0.0198    | 0.018     | 0.0167    | 0.0123    | 0.0196    | 0.0211    |
| 0.0041    | 0.0181    | 0.0765    | 0.0746    | 0.0427    | 0         | 0.0235    | 0.0645    | 0.0523    |
| 0         | 0         | 0         | 0         | 0         | 0         | 0         | 0         | 0         |
| 0         | 0         | 0         | 0         | 0         | 0         | 0         | 0         | 0         |
| 0.0092    | 0         | 0.0059    | 0.0111    | 0         | 0.0128    | 0         | 0.0168    | 0.0093    |
| 0.1468    | 0.0818    | 0.0488    | 0.0616    | 0.1461    | 0.0771    | 0.0461    | 0.075     | 0         |
| 0.1547    | 0.0805    | 0.0784    | 0.2901    | 0.1494    | 0.2634    | 0.2395    | 0.1388    | 0.1846    |
| 0.0036    | 9.00E-04  | 0.0011    | 0         | 0         | 0         | 0         | 0.007     | 4.00E-04  |
| 0.0336    | 0.0392    | 0.0036    | 0.0099    | 0.0325    | 0.0666    | 0.0791    | 0.0213    | 0.0155    |
| 0.2396    | 0.2602    | 0.231     | 0.2787    | 0.2751    | 0.1974    | 0.1982    | 0.1609    | 0.2664    |
| 0.042     | 0.0428    | 0.0357    | 0.0599    | 0.0542    | 0.0462    | 0.0675    | 0.0133    | 0.0289    |
| 0.0144    | 0.0059    | 0.0114    | 0.0233    | 0.038     | 0         | 0.0151    | 0.0699    | 0         |
| 0.0463    | 0.1165    | 0.1369    | 0.1779    | 0.1059    | 0.1182    | 0.097     | 0.1673    | 0.1256    |
| 0.0724    | 0.075     | 0.0782    | 0.0435    | 0.0483    | 0.0466    | 0.0503    | 0.09      | 0.0717    |

|          |        |          |        |          |        |          |        |        |
|----------|--------|----------|--------|----------|--------|----------|--------|--------|
| 0.0039   | 0.0041 | 6.00E-04 | 0.006  | 0.005    | 0.0029 | 8.00E-04 | 0.0024 | 0.0051 |
| 6.00E-04 | 0.0022 | 0        | 0.0115 | 0        | 0.0169 | 6.00E-04 | 0.0039 | 0.0107 |
| 0.1558   | 0.1535 | 0.1893   | 0.0702 | 0.0496   | 0.1061 | 0.0854   | 0.2259 | 0.1523 |
| 0.0083   | 0      | 0        | 0      | 0.0161   | 0      | 0.0018   | 0      | 0      |
| 0.1673   | 0.1784 | 0.1438   | 0.2292 | 0.2186   | 0.1553 | 0.1099   | 0.134  | 0.1565 |
| 0.0153   | 0.025  | 0.0456   | 0      | 0.0168   | 0.0216 | 0.0411   | 0.0419 | 0      |
| 0.0703   | 0.0513 | 0.0285   | 0      | 0.0094   | 0.0103 | 0.0671   | 0.0219 | 0.0036 |
| 0.0207   | 0.0216 | 0.0158   | 0.0163 | 0.016    | 0      | 0        | 0.0383 | 0.0254 |
| 0.0168   | 0.0075 | 0.0569   | 0.0427 | 0.0639   | 0.0184 | 3.00E-04 | 0.031  | 0.0391 |
| 0.0728   | 0.0024 | 0.0092   | 0.0139 | 0.0394   | 0      | 0        | 0.0266 | 0.0189 |
| 0.0285   | 0.0305 | 0.0856   | 0.102  | 0.0935   | 0.0174 | 0.0451   | 0.018  | 0.0752 |
| 0.0538   | 0.0378 | 0.0384   | 0.1373 | 0.1081   | 0.0525 | 0.0342   | 0.0132 | 0.0656 |
| 0.0746   | 0.0921 | 0.1634   | 0.0692 | 0.1006   | 0      | 0.0824   | 0.1552 | 0.108  |
| 0        | 0      | 0.0057   | 0.0191 | 0        | 0      | 0        | 0.0346 | 0.0169 |
| 0        | 0      | 0        | 0      | 2.00E-04 | 0      | 0.02     | 0      | 0      |
| 0.6255   | 0.5492 | 0.5599   | 0.446  | 0.6145   | 0.4427 | 0.5291   | 0.4404 | 0.4067 |
| 0.0516   | 0.0178 | 0.0067   | 0.0489 | 0.0076   | 0.0055 | 0        | 0.0336 | 0.0076 |
| 0.6771   | 0.567  | 0.5666   | 0.4949 | 0.6222   | 0.4482 | 0.5291   | 0.474  | 0.4143 |

| GSM110099 | GSM110099 | GSM110099 | GSM110100 |
|-----------|-----------|-----------|-----------|-----------|-----------|-----------|-----------|-----------|-----------|
| 0.0118    | 0.0256    | 0.0202    | 0         | 0         | 0.0157    | 0         | 0.0022    | 0.0236    |           |
| 0         | 0         | 0         | 0         | 0         | 0         | 0         | 0         | 0         |           |
| 0.0795    | 0.0874    | 0.038     | 0.158     | 0.2279    | 0.1785    | 0.1661    | 0.1966    | 0.1808    |           |
| 0         | 0         | 0.0363    | 0.0067    | 0         | 0         | 0.0377    | 0.0266    | 0         |           |
| 0.1122    | 0.1993    | 0.0701    | 0.1466    | 0.0904    | 0.1766    | 0.0737    | 0.129     | 0.2065    |           |
| 0.0551    | 0.1013    | 0.0661    | 0.1063    | 0.0733    | 0.0897    | 0.0243    | 0.0758    | 0.0332    |           |
| 0.0514    | 0.0657    | 0.0392    | 0.023     | 0.06      | 0.0664    | 0.0483    | 0.0695    | 0.0107    |           |
| 0.1736    | 0.2217    | 0.1032    | 0.1914    | 0.1666    | 0.2361    | 0.1387    | 0.2042    | 0.2546    |           |
| 0.0573    | 0.055     | 0.0173    | 0.0805    | 0         | 0.0454    | 0         | 0.0434    | 0.1297    |           |
| 0.148     | 0.0784    | 0.0935    | 0.2019    | 0.0744    | 0.1347    | 0.1481    | 0.1274    | 0.2076    |           |
| 0.0838    | 0.0235    | 0.0312    | 0.1179    | 0.0286    | 0.0852    | 0.0542    | 0.0946    | 0.1119    |           |
| 0.0904    | 0         | 0.0558    | 0.1648    | 0.018     | 0.0032    | 0.114     | 0.1108    | 0.0212    |           |
| 0.0651    | 0.0621    | 0.0765    | 0.0445    | 0.0975    | 0.0749    | 0.0463    | 0.0261    | 0.0855    |           |
| 0.099     | 0.1043    | 0.0615    | 0.0812    | 0.0526    | 0.0976    | 0.0774    | 0.1011    | 0.1119    |           |
| 0.0241    | 0         | 0         | 0         | 0         | 0         | 0         | 0         | 0         |           |
| 0         | 0.0407    | 0         | 0         | 0.0198    | 0.0175    | 0         | 0.0196    | 0.0465    |           |
| 0.0551    | 0.0584    | 0.0435    | 0.0971    | 0.1626    | 0.1049    | 0.1103    | 0.191     | 0.1086    |           |
| 0         | 0         | 0         | 0.013     | 0         | 0         | 0         | 0         | 0         |           |
| 0.0191    | 0         | 0         | 0         | 0.0211    | 0         | 0.0108    | 0.0087    | 0.0331    |           |
| 0.0889    | 0.1585    | 0.308     | 0.1674    | 0.2549    | 0.1905    | 0.1531    | 0.1363    | 0.0058    |           |
| 0.0328    | 0.0455    | 0.0632    | 0.0461    | 0.0495    | 0.033     | 0.0421    | 0.0522    | 0.0255    |           |
| 0         | 0.1119    | 0.1757    | 0.1384    | 0.0747    | 0.108     | 0.0798    | 0.1361    | 0         |           |
| 0.0133    | 0.0241    | 0         | 0.0282    | 0         | 0.0109    | 0         | 0.0252    | 0         |           |
| 0.0374    | 0         | 0         | 0         | 0         | 0         | 0         | 0         | 0         |           |
| 3.00E-04  | 0.0465    | 0         | 5.00E-04  | 0.0163    | 0.0377    | 0.0207    | 0.0121    | 0.0299    |           |
| 0.0053    | 0.0107    | 0.0134    | 0.0142    | 0.0173    | 0         | 0.0158    | 0.0029    | 0.0169    |           |
| 0         | 0.0046    | 0.0014    | 0.0054    | 0         | 0         | 0         | 0.0177    | 0.0092    |           |
| 0.094     | 0         | 0         | 0.0572    | 0         | 0.0313    | 0         | 0         | 0         |           |
| 0.0373    | 0         | 0.059     | 0.063     | 0.0802    | 0.0018    | 0.0293    | 0.0387    | 0         |           |
| 0.1254    | 0         | 0.1252    | 0.2528    | 0.0403    | 0.0906    | 0.1677    | 0.2683    | 0         |           |
| 0.0848    | 0.0563    | 0.0355    | 0.04      | 0.0376    | 0.0391    | 0.0701    | 0.039     | 0.0025    |           |
| 0.0238    | 0.0172    | 0.0062    | 0.0221    | 0.0225    | 0.0137    | 0.0332    | 0.022     | 0         |           |
| 0.0222    | 0.0232    | 0.0182    | 0         | 0.0068    | 8.00E-04  | 0.0149    | 0         | 0         |           |
| 0.0146    | 0.0056    | 0.0169    | 0.0211    | 0         | 0.0174    | 0.0027    | 0.022     | 0.007     |           |
| 0.1838    | 0.1666    | 0.2406    | 0.1756    | 0.1116    | 0.1264    | 0.22      | 0.2451    | 0.2087    |           |
| 0.0231    | 0.0189    | 0.0201    | 0.0244    | 0.0239    | 0.0128    | 0.0255    | 0.0234    | 0.0244    |           |
| 0.032     | 0.0296    | 0         | 0.0674    | 0.0712    | 0.0528    | 0.0574    | 0.0814    | 0.065     |           |
| 0         | 0         | 0         | 0         | 0         | 0         | 0         | 0.0151    | 0         |           |
| 0.0148    | 0         | 0         | 0         | 0         | 0         | 0         | 0         | 0         |           |
| 0.0019    | 0.0141    | 0         | 0         | 0.02      | 0.0089    | 0         | 0         | 0.0131    |           |
| 0.1189    | 0.0064    | 0.0642    | 0.1254    | 0.0302    | 0         | 0.0999    | 0.1367    | 0.1082    |           |
| 0.1931    | 0.1523    | 0.2871    | 0.1308    | 0.3556    | 0.1665    | 0.3039    | 0.1611    | 0.0225    |           |
| 0.0013    | 0.0039    | 0         | 0.001     | 0         | 0.0022    | 0         | 0         | 0.0144    |           |
| 0.0382    | 0.0866    | 0.0607    | 0         | 0.0493    | 0.0621    | 0.0554    | 0         | 0.0657    |           |
| 0.2827    | 0.1805    | 0.2223    | 0.2381    | 0.177     | 0.2251    | 0.2083    | 0.1872    | 0.1804    |           |
| 0.0414    | 0.0445    | 0.0401    | 0.0663    | 0.0388    | 0.0367    | 0.0463    | 0.0396    | 0.0048    |           |
| 0         | 0.0275    | 0.007     | 0.0444    | 0.054     | 0.0399    | 0.0517    | 0.0764    | 0.0358    |           |
| 0.1447    | 0.1119    | 0.1743    | 0.132     | 0.062     | 0.0942    | 0.1276    | 0.163     | 0.1075    |           |
| 0.076     | 0.0716    | 0.0429    | 0.0716    | 0.0425    | 0.0715    | 0.0453    | 0.087     | 0.1216    |           |

|        |        |        |        |        |        |        |        |        |
|--------|--------|--------|--------|--------|--------|--------|--------|--------|
| 0.0027 | 0.0054 | 0.0047 | 0.0043 | 0.0024 | 0.0038 | 0.0026 | 0.0062 | 0.0013 |
| 0      | 0.0035 | 0.0033 | 0      | 0.0126 | 0.0017 | 0      | 0      | 0      |
| 0.1201 | 0.1284 | 0.0908 | 0.0398 | 0.1231 | 0.1114 | 0.1203 | 0.0774 | 0.1645 |
| 0.0189 | 0      | 0      | 0      | 0      | 0      | 0.0013 | 0      | 0.0284 |
| 0.1836 | 0      | 0.197  | 0.2554 | 0.1992 | 0.1287 | 0.2366 | 0.1879 | 0.0222 |
| 0.0152 | 0.0386 | 0      | 0.0245 | 0.0241 | 0.0499 | 0.0294 | 0.0208 | 0.0674 |
| 0.0111 | 0.0897 | 0      | 0.0334 | 0.023  | 0.0208 | 0.0285 | 0.0144 | 0.0672 |
| 0      | 0.0095 | 0      | 0.0292 | 0      | 0.0179 | 0      | 0.0371 | 0.0275 |
| 0.0866 | 0.0178 | 0      | 0.034  | 0      | 0.015  | 0.0293 | 0.0153 | 0.0553 |
| 0.0063 | 0      | 0      | 0.0344 | 0      | 0      | 0.0144 | 0.001  | 0      |
| 0.0654 | 0.0338 | 0.0532 | 0.0615 | 0.064  | 0.0324 | 0.0738 | 0.0781 | 0.0771 |
| 0.0719 | 0.024  | 0.1015 | 0.0975 | 0.1164 | 0.0501 | 0.0894 | 0.0857 | 0.0242 |
| 0.0674 | 0.098  | 0.0442 | 0.1463 | 0.148  | 0.1541 | 0.1017 | 0.1037 | 0.1624 |
| 0.0059 | 0.0161 | 0      | 0.0229 | 0      | 0.0085 | 0.0224 | 0.0484 | 0.0479 |
| 0      | 0      | 0      | 0.0026 | 0      | 0      | 0      | 0.0132 | 0      |
| 0.4666 | 0.4523 | 0.4579 | 0.5823 | 0.5098 | 0.5326 | 0.5127 | 0.5247 | 0.5227 |
| 0.0221 | 0.0248 | 0.0101 | 0.0141 | 0.0106 | 0.0133 | 0.0054 | 0.018  | 0.0284 |
| 0.4887 | 0.4772 | 0.468  | 0.5964 | 0.5204 | 0.5459 | 0.5181 | 0.5427 | 0.5511 |

| GSM11010CGSM11010CGSM11010CGSM11010CGSM110101GSM110101GSM110101GSM110101GSM110101 |          |        |          |          |        |        |          |          |  |
|-----------------------------------------------------------------------------------|----------|--------|----------|----------|--------|--------|----------|----------|--|
| 0.0268                                                                            | 0.0147   | 0.0121 | 0        | 0        | 0.0152 | 0.0105 | 0.0025   | 0.0388   |  |
| 0                                                                                 | 0        | 0      | 0        | 0        | 0      | 0      | 0        | 0        |  |
| 0.3468                                                                            | 0.1029   | 0.0843 | 0.1397   | 0.1964   | 0.0732 | 0.1261 | 0.1315   | 0.2166   |  |
| 0.0297                                                                            | 0.1081   | 0      | 0        | 0        | 0.0331 | 0      | 0        | 0        |  |
| 0.1563                                                                            | 0.0562   | 0.1178 | 0.168    | 0.0846   | 0.1648 | 0.1449 | 0.2365   | 0.173    |  |
| 0.0399                                                                            | 0.033    | 0.0853 | 0.0513   | 0.0512   | 0.0928 | 0.079  | 0.0834   | 0.068    |  |
| 0.0796                                                                            | 0.0438   | 0.018  | 0.0535   | 0.0475   | 0.055  | 0.0509 | 0.053    | 0.0537   |  |
| 0.2507                                                                            | 0.1164   | 0.147  | 0.243    | 0.1549   | 0.2276 | 0.2001 | 0.3061   | 0.2458   |  |
| 0                                                                                 | 0.0089   | 0.0709 | 0.036    | 0.045    | 0.0183 | 0.0362 | 0.1262   | 0        |  |
| 0.1097                                                                            | 0.0722   | 0.1328 | 0.1094   | 0.1328   | 0.109  | 0.1299 | 0.2054   | 0.0797   |  |
| 0.0784                                                                            | 0.023    | 0.0669 | 0.0556   | 0.0767   | 0.0466 | 0.0875 | 0.1439   | 0.0445   |  |
| 0.0859                                                                            | 0        | 0      | 0.055    | 0.0535   | 0.0218 | 0.0145 | 0.1368   | 0.0382   |  |
| 0.0419                                                                            | 0.0749   | 0.1076 | 0.04     | 0.0129   | 0.1062 | 0.0813 | 0.0899   | 0.0721   |  |
| 0.115                                                                             | 0.0639   | 0.0769 | 0.1166   | 0.0924   | 0.0915 | 0.0885 | 0.1228   | 0.1118   |  |
| 0                                                                                 | 0        | 0      | 0        | 0.0025   | 0      | 0.0015 | 0        | 0.013    |  |
| 0                                                                                 | 0.1166   | 0      | 0.0104   | 0.0098   | 0.0067 | 0      | 0.0135   | 3.00E-04 |  |
| 0.1615                                                                            | 0.0771   | 0.0381 | 0.1221   | 0.0969   | 0.0555 | 0.0841 | 0.076    | 0.0693   |  |
| 0                                                                                 | 0        | 0      | 0.0068   | 0        | 0.0107 | 0      | 0        | 0        |  |
| 0                                                                                 | 0.0083   | 0.0221 | 0.0131   | 0.0188   | 0.0067 | 0.0303 | 0.0135   | 0.0037   |  |
| 0                                                                                 | 0.194    | 0.1478 | 0.1022   | 0.2444   | 0.1655 | 0.1317 | 0.103    | 0.2122   |  |
| 0.0308                                                                            | 0.0433   | 0.0638 | 0.0388   | 0.0393   | 0.031  | 0.0379 | 0.014    | 0.0348   |  |
| 0.0247                                                                            | 0.0154   | 0.0968 | 0        | 0.0838   | 0.0958 | 0.0877 | 0.032    | 0.0932   |  |
| 0.0054                                                                            | 0        | 0.0109 | 0.011    | 0.0085   | 0.0756 | 0.0132 | 0.0306   | 0.0037   |  |
| 0                                                                                 | 0        | 0      | 0        | 0        | 0.0547 | 0      | 0        | 0        |  |
| 0.0338                                                                            | 0        | 0      | 9.00E-04 | 0        | 0.0637 | 0.0302 | 0        | 0.0456   |  |
| 0.0127                                                                            | 0.0101   | 0.0102 | 0.0061   | 0.0162   | 0.0134 | 0.0206 | 0.0127   | 0        |  |
| 0                                                                                 | 0.0187   | 0.0089 | 0        | 4.00E-04 | 0.0101 | 0      | 0.0151   | 0.0101   |  |
| 0                                                                                 | 0        | 0      | 0        | 0.0347   | 0.0393 | 0.0518 | 0        | 0        |  |
| 0.0493                                                                            | 0.0385   | 0.0409 | 0        | 0.0884   | 0.0042 | 0      | 0        | 0        |  |
| 0.0444                                                                            | 0        | 0.1174 | 0.126    | 0.3123   | 0.0832 | 0.1208 | 0.1003   | 0.0367   |  |
| 0.0571                                                                            | 0.0546   | 0.0145 | 0.067    | 0.0441   | 0.05   | 0.0962 | 0.0169   | 0.0398   |  |
| 0.0206                                                                            | 0.0191   | 0      | 0.0159   | 0.0229   | 0.0234 | 0.024  | 0.0053   | 0.0231   |  |
| 0                                                                                 | 0.0347   | 0      | 0.0451   | 0.0443   | 0      | 0.0309 | 0        | 0        |  |
| 0.0048                                                                            | 0.0065   | 0      | 0        | 0.0015   | 0.025  | 0      | 0        | 0.0158   |  |
| 0.2101                                                                            | 0.1787   | 0.1976 | 0.1836   | 0.1138   | 0.223  | 0.1655 | 0.1593   | 0.1034   |  |
| 0.0132                                                                            | 0.0194   | 0.0238 | 0.0131   | 0.0241   | 0.0235 | 0.0186 | 0.0217   | 0.0203   |  |
| 0.1242                                                                            | 0.0176   | 0.0378 | 0.0307   | 0.1104   | 0.0241 | 0.0415 | 0.0379   | 0.0871   |  |
| 0                                                                                 | 0.0027   | 0      | 0        | 0.0067   | 0      | 0      | 0        | 0        |  |
| 0                                                                                 | 0        | 0      | 0        | 0        | 0      | 0      | 0        | 0        |  |
| 0.012                                                                             | 0.0118   | 0      | 0.0112   | 0.0113   | 0.008  | 0.0028 | 0.0041   | 0.0066   |  |
| 0.1357                                                                            | 0.048    | 0      | 0.0981   | 0.0868   | 0.0479 | 0.0436 | 0.133    | 0.127    |  |
| 0.0836                                                                            | 0.2424   | 0.2372 | 0.1208   | 0.2465   | 0.0394 | 0.2175 | 2.00E-04 | 0        |  |
| 0.0051                                                                            | 5.00E-04 | 0.0042 | 0.0035   | 0.0072   | 0.0042 | 0.004  | 0.0055   | 0.0033   |  |
| 0.0241                                                                            | 0.0972   | 0.0861 | 0.0531   | 0.0217   | 0.0162 | 0.0536 | 0        | 0.0322   |  |
| 0.2191                                                                            | 0.1439   | 0.2204 | 0.2304   | 0.1859   | 0.1613 | 0.2624 | 0.2267   | 0.1972   |  |
| 0.0235                                                                            | 0.027    | 0.0483 | 0.0325   | 0.0702   | 0.0262 | 0.0577 | 0.0414   | 0.0193   |  |
| 0.0772                                                                            | 0        | 0      | 0.0563   | 0.0624   | 0      | 0.0698 | 0.0437   | 0.0104   |  |
| 0.1384                                                                            | 0.1105   | 0.1516 | 0.1206   | 0.091    | 0.1739 | 0.0874 | 0.1201   | 0.1091   |  |
| 0.1051                                                                            | 0.0416   | 0.0672 | 0.0897   | 0.0226   | 0.0868 | 0.0658 | 0.1135   | 0.1211   |  |



|        |        |        |        |        |        |        |        |        |
|--------|--------|--------|--------|--------|--------|--------|--------|--------|
| 0      | 0.0029 | 0.0062 | 0.0019 | 0.0041 | 0.0068 | 0.0036 | 0.0039 | 0.0045 |
| 0      | 0.0046 | 0      | 0.0083 | 0.0198 | 0      | 0      | 0.0056 | 0      |
| 0.1616 | 0.0569 | 0.0787 | 0.1243 | 0.0158 | 0.1163 | 0.1145 | 0.1592 | 0.1817 |
| 0      | 0      | 0      | 0      | 0      | 0.0068 | 0      | 0.0345 | 0.0066 |
| 0.1776 | 0.0812 | 0.1297 | 0.164  | 0.1165 | 0.061  | 0.1705 | 0.246  | 0.0834 |
| 0.1222 | 0.0389 | 0.009  | 0.0285 | 0.0409 | 0.0625 | 0.0085 | 0.0214 | 0.0766 |
| 0.0465 | 0.005  | 0.0114 | 0.086  | 0      | 0.0553 | 0.038  | 0.0548 | 0.0891 |
| 0.0387 | 0      | 0.0154 | 0.0121 | 0      | 0.0434 | 0      | 0.0067 | 0.0059 |
| 0.0017 | 0      | 0.0246 | 0.0717 | 0.0607 | 0.0487 | 0.0587 | 0      | 0.0529 |
| 0      | 0      | 0.0095 | 0.0172 | 0.0375 | 0.0104 | 0      | 0.0219 | 0.0069 |
| 0.0292 | 0.0655 | 0.0667 | 0.0539 | 0.1181 | 0.0376 | 0.0389 | 0.0858 | 0.0618 |
| 0.0299 | 0.0434 | 0.0498 | 0.0647 | 0.0912 | 0.0139 | 0.0485 | 0.08   | 0.0518 |
| 0.2331 | 0.1005 | 0.0962 | 0.1008 | 0.1295 | 0.0728 | 0.0917 | 0.1293 | 0.1995 |
| 0.0586 | 0.0033 | 0      | 0.0292 | 0.0342 | 0.0141 | 0.0229 | 0.0454 | 0      |
| 0.0425 | 0      | 0      | 0      | 0      | 0      | 0      | 0      | 0      |
| 0.5563 | 0.4211 | 0.3889 | 0.4962 | 0.5415 | 0.4415 | 0.484  | 0.5509 | 0.5975 |
| 0.0161 | 0.0115 | 0.0226 | 0.012  | 0.0136 | 0.0488 | 0.027  | 0.0233 | 0.0231 |
| 0.5724 | 0.4326 | 0.4114 | 0.5082 | 0.5552 | 0.4903 | 0.511  | 0.5742 | 0.6206 |

| GSM110101 | GSM110101 | GSM110101 | GSM110101 | GSM110101 | GSM110102 | GSM110102 | GSM110102 | GSM110102 |
|-----------|-----------|-----------|-----------|-----------|-----------|-----------|-----------|-----------|
| 0.0069    | 0         | 0         | 0.0042    | 0.016     | 0         | 0.0139    | 0.011     | 0.0178    |
| 0         | 0         | 0         | 0         | 0         | 0         | 0         | 0         | 0         |
| 0.1916    | 0.1479    | 0.1036    | 0.0704    | 0.3643    | 0.2133    | 0.1845    | 0.2021    | 0.2344    |
| 0         | 0         | 0         | 0.013     | 0.0104    | 0.0089    | 0.0819    | 0         | 0.0364    |
| 0.2256    | 0.1128    | 0.0973    | 0.1466    | 0.1163    | 0.1418    | 0.1385    | 0.1631    | 0.1603    |
| 0.0494    | 0.0626    | 0.0938    | 0.0793    | 0.0088    | 0.1005    | 0.025     | 0.0069    | 0.0442    |
| 0.1185    | 0.0107    | 0.1365    | 0.0568    | 0.089     | 0.0281    | 0.0461    | 0.023     | 0.0431    |
| 0.2957    | 0.1684    | 0.1905    | 0.2069    | 0.201     | 0.1976    | 0.1996    | 0.222     | 0.2363    |
| 0.0411    | 0.0547    | 0.0108    | 0.0552    | 0         | 0.0889    | 0.0632    | 0.0789    | 0         |
| 0.1454    | 0.1224    | 0.0939    | 0.1276    | 0.0654    | 0.1452    | 0.1917    | 0.199     | 0.1372    |
| 0.1161    | 0.0466    | 0.0324    | 0.0797    | 0.0139    | 0.0958    | 0.1538    | 0.0924    | 0.0624    |
| 0.1563    | 0         | 0         | 0.0037    | 0.0564    | 0.0715    | 0.1123    | 0.1553    | 0.1252    |
| 0.0213    | 0.0754    | 0.0455    | 0.0999    | 0.076     | 0.059     | 0.0109    | 0.0321    | 0.06      |
| 0.1042    | 0.0755    | 0.1033    | 0.0982    | 0.0963    | 0.0953    | 0.1083    | 0.1259    | 0.11      |
| 0         | 0         | 0.0146    | 0         | 0         | 0         | 0.0111    | 0         | 0.0178    |
| 0         | 0         | 0         | 0.016     | 0         | 0         | 0         | 0         | 0         |
| 0.1419    | 0.1319    | 0.0762    | 0.1115    | 0.1539    | 0.114     | 0.0927    | 0.1315    | 0.0751    |
| 0.0539    | 0         | 0         | 0         | 0.045     | 0.0125    | 0.0017    | 0         | 0.0216    |
| 0.0075    | 0         | 0.0016    | 0.0159    | 0         | 0         | 0.0036    | 0         | 0         |
| 0.0464    | 0.1638    | 0.2396    | 0.1931    | 0.0589    | 0.0426    | 0.1254    | 0.042     | 0.1366    |
| 0.0268    | 0.0472    | 0.0516    | 0.0449    | 0.0299    | 0.0331    | 0.0159    | 0.0274    | 0.0192    |
| 0.0753    | 0.1358    | 0.0447    | 0.166     | 0.0473    | 0.1291    | 0.0327    | 0         | 0.0567    |
| 0.0705    | 0.0426    | 0.0487    | 0.0377    | 0         | 0.0844    | 0         | 0.0263    | 0.0328    |
| 0         | 0         | 0         | 0         | 0         | 0         | 0.0432    | 0         | 0.062     |
| 0         | 0.0064    | 0.0193    | 0.007     | 0.0201    | 0.0277    | 0.0114    | 0         | 0         |
| 0.0268    | 0.009     | 0.0174    | 0         | 0.0078    | 0.0127    | 0.0249    | 0.0132    | 0.0099    |
| 0.0047    | 0.001     | 0.0116    | 0.0054    | 0.0034    | 0         | 0         | 0.0076    | 0.003     |
| 0         | 0         | 0         | 0         | 0         | 0.0666    | 0         | 0         | 0.0337    |
| 0         | 0.0198    | 0.0721    | 0.0104    | 0.0381    | 0.0322    | 0.0625    | 0         | 0.0658    |
| 0.2284    | 0.1378    | 0.1116    | 0.1172    | 0.0323    | 0.146     | 0.1758    | 0.1829    | 0.1434    |
| 0.0424    | 0.0355    | 0.0523    | 0.0334    | 0.0412    | 0.0088    | 0.0963    | 0.0449    | 0.081     |
| 0.0296    | 0.0074    | 0.0264    | 0.015     | 0.0251    | 0.02      | 0.0485    | 0.0255    | 0.038     |
| 0.0227    | 0.0428    | 0.0144    | 0.002     | 0.012     | 0         | 0.0358    | 0.019     | 0.0252    |
| 0.0099    | 0         | 0         | 0.0136    | 0.0205    | 0.0276    | 0.0096    | 0.0031    | 0.029     |
| 0         | 0.1995    | 0.291     | 0.2432    | 0.188     | 0.1626    | 0.2212    | 0.1527    | 0.1487    |
| 0.0289    | 0.0193    | 0.0157    | 0.0245    | 0.0078    | 0.0281    | 0.0236    | 0.0266    | 0.0174    |
| 0.0909    | 0.0475    | 0.047     | 0.0244    | 0.1465    | 0.1202    | 0.0679    | 0.0859    | 0.0999    |
| 0.0124    | 0         | 0.0021    | 0.0016    | 0         | 0.0048    | 0         | 0.0112    | 0         |
| 0         | 0         | 0         | 0         | 0         | 0         | 0         | 0         | 0         |
| 0.0109    | 0         | 0.0074    | 0.0069    | 0.0106    | 0.0052    | 0         | 0         | 0         |
| 0.2183    | 0         | 0         | 0         | 0.1874    | 0.1056    | 0.0964    | 0.1822    | 0.1927    |
| 0         | 0.2654    | 0.2654    | 0.2551    | 0         | 0.2433    | 0.0513    | 0.105     | 0         |
| 0.0064    | 0.0044    | 0         | 0         | 0.0046    | 0.0078    | 0         | 0.0029    | 0.0041    |
| 0         | 0.0568    | 0.0669    | 0.0283    | 0.0212    | 0.0396    | 0         | 0         | 0         |
| 0.2923    | 0.2207    | 0.2181    | 0.1729    | 0.1953    | 0.1952    | 0.288     | 0.2477    | 0.2212    |
| 0.063     | 0.0594    | 0.0643    | 0.0448    | 0         | 0.0495    | 0.0381    | 0.0388    | 0.0238    |
| 0.0633    | 0.0688    | 0.066     | 0.0498    | 0.0593    | 0.0342    | 0.005     | 0.0709    | 0.044     |
| 0.0063    | 0.1171    | 0.1408    | 0.1614    | 0.126     | 0.0997    | 0.1328    | 0.1111    | 0.1032    |
| 0.079     | 0.0467    | 0.0467    | 0.0779    | 0.1207    | 0.0685    | 0.0682    | 0.0831    | 0.1023    |

|        |        |        |        |        |        |        |        |        |
|--------|--------|--------|--------|--------|--------|--------|--------|--------|
| 0.0055 | 0.0049 | 0.0038 | 0.0047 | 0.0022 | 0.0043 | 0      | 0.0013 | 0.0051 |
| 0.0145 | 0      | 0.0059 | 0.0061 | 0      | 0      | 0.0026 | 0.0075 | 0      |
| 0.1063 | 0.1034 | 0.0733 | 0.1216 | 0.142  | 0.0713 | 0.1078 | 0.1209 | 0.1419 |
| 0.0018 | 0      | 0      | 0      | 0      | 0      | 0.0111 | 0.0444 | 0.0157 |
| 0.1682 | 0.1371 | 0.1904 | 0.1219 | 0.1424 | 0.1998 | 0.2259 | 0.1902 | 0.1335 |
| 0.0381 | 0      | 0      | 0.0397 | 0.0615 | 0.0394 | 0.0263 | 0.038  | 0.0513 |
| 0.0591 | 0.0281 | 0      | 0.0282 | 0.0379 | 0.0149 | 0.0065 | 0.0733 | 0.0877 |
| 0.0331 | 0.0145 | 0.0271 | 0.0243 | 0.0239 | 0.0315 | 0.0272 | 0.014  | 0.0397 |
| 0.1072 | 0.0525 | 0.0338 | 0.0213 | 0.0727 | 0.0767 | 0.0395 | 0.0191 | 0.0322 |
| 0.0258 | 0.0055 | 0      | 0      | 0.0208 | 0.0334 | 0.027  | 0.007  | 0.0076 |
| 0.0582 | 0.0302 | 0.0617 | 0.09   | 0.0385 | 0.053  | 0.0651 | 0.0586 | 0.0265 |
| 0.0564 | 0.0401 | 0.0741 | 0.0775 | 0.0087 | 0.043  | 0.0812 | 0.0706 | 0.0414 |
| 0.1229 | 0.0982 | 0.0731 | 0.0349 | 0.2649 | 0.1677 | 0.152  | 0.1381 | 0.1954 |
| 0.0933 | 0.0102 | 0.0387 | 0.0347 | 0.066  | 0.0707 | 0.0589 | 0.0513 | 0.0206 |
| 0      | 0      | 0      | 0      | 0.0515 | 0      | 0.0063 | 0.0017 | 0.0165 |
| 0.6223 | 0.4261 | 0.4357 | 0.4087 | 0.6135 | 0.4913 | 0.5627 | 0.5576 | 0.6619 |
| 0.0424 | 0.0213 | 0.0252 | 0.0289 | 0.008  | 0.0422 | 0.0087 | 0.0186 | 0.0253 |
| 0.6648 | 0.4474 | 0.4609 | 0.4376 | 0.6215 | 0.5335 | 0.5715 | 0.5762 | 0.6872 |

| GSM110102 | GSM110102 | GSM110102 | GSM110102 | GSM110102 | GSM110102 | GSM110103 | GSM110103 | GSM110103 |
|-----------|-----------|-----------|-----------|-----------|-----------|-----------|-----------|-----------|
| 0         | 0         | 0         | 0.0154    | 0         | 0         | 0         | 0.0029    | 0         |
| 0         | 0         | 0         | 0         | 0         | 0         | 0         | 0         | 0         |
| 0.1708    | 0.1837    | 0.08      | 0.1192    | 0.1651    | 0.1896    | 0.1722    | 0.1368    | 0.3759    |
| 0.0958    | 0         | 0         | 0.0076    | 0.0205    | 0         | 0.0215    | 0         | 0         |
| 0.1542    | 0.1627    | 0.0471    | 0.1334    | 0.1797    | 0.125     | 0.1218    | 0.1452    | 0.1308    |
| 0.0829    | 0.1221    | 0.0185    | 0.0838    | 0.0154    | 0.1044    | 0.0581    | 0.0704    | 0.0721    |
| 0.0437    | 0.0816    | 0         | 0.0449    | 0.0417    | 0.0515    | 0.0604    | 0.1151    | 0.1148    |
| 0.1598    | 0.2001    | 0.0458    | 0.1891    | 0.2297    | 0.2003    | 0.1537    | 0.1931    | 0.2269    |
| 0.0609    | 0.085     | 0.0064    | 0.0232    | 0.0584    | 0.046     | 0.0796    | 0.0336    | 0.0114    |
| 0.1261    | 0.0964    | 0.0609    | 0.1371    | 0.1818    | 0.1328    | 0.1788    | 0.1121    | 0.1615    |
| 0.0738    | 0.0253    | 0.0172    | 0.0905    | 0.1127    | 0.0837    | 0.0811    | 0.0707    | 0.0997    |
| 0.0709    | 0.0462    | 0.0706    | 0.1117    | 0.1306    | 0.0795    | 0.0887    | 0.0935    | 0.1322    |
| 0.0461    | 0.0874    | 0.0457    | 0.0463    | 0.0079    | 0.0532    | 0.0387    | 0.0271    | 0.0528    |
| 0.0661    | 0.087     | 0.0435    | 0.09      | 0.122     | 0.0863    | 0.0445    | 0.0619    | 0.1197    |
| 0         | 0         | 0.0293    | 0         | 0.0466    | 0         | 0         | 0         | 0         |
| 0         | 0         | 0         | 0         | 0         | 0.0457    | 0         | 0.0014    | 0         |
| 0.1166    | 0.0831    | 0.0531    | 0.0688    | 0.141     | 0.0786    | 0.0699    | 0.1146    | 0.1596    |
| 0.0035    | 0         | 0.0159    | 0         | 0.0187    | 0.0045    | 0.0273    | 0         | 0.0245    |
| 0         | 2.00E-04  | 0.0113    | 0.0052    | 0         | 0.0124    | 0.0282    | 0.0022    | 0.0029    |
| 0.1704    | 0.1729    | 0.2188    | 0.1579    | 0.0526    | 0.0672    | 0.1298    | 0.1747    | 0.0121    |
| 0.0631    | 0.0425    | 0.0509    | 0.0373    | 0.0237    | 0.0593    | 0.0587    | 0.0669    | 0.03      |
| 0.1532    | 0.0842    | 0.1723    | 0.0879    | 0.0957    | 0.0643    | 0.1374    | 0.06      | 0.0653    |
| 0         | 0         | 0         | 0.0635    | 0.035     | 0.0442    | 0         | 0         | 0         |
| 0         | 0         | 0         | 0         | 0.0027    | 0         | 0         | 0         | 0         |
| 0         | 0.008     | 0         | 0         | 0.0149    | 0.0033    | 0         | 0         | 0.0168    |
| 0.0079    | 0.0093    | 0.0049    | 0.0179    | 0.0145    | 0.0061    | 0.0146    | 0         | 0.0196    |
| 0.0128    | 0         | 0.0115    | 0.0051    | 0.0069    | 0.016     | 0.0134    | 0.0034    | 0         |
| 0.0758    | 0.0354    | 0         | 0         | 0.0395    | 0         | 0         | 0         | 0.0079    |
| 0.111     | 0.0482    | 0.0549    | 0.0247    | 0         | 0         | 0         | 0.045     | 0.0331    |
| 0.4195    | 0.1849    | 0.3578    | 0.2007    | 0.2192    | 0.0772    | 0.3263    | 0.1767    | 0.1435    |
| 0.0595    | 0.049     | 0.0614    | 0.067     | 0.0611    | 0.0474    | 0.0244    | 0.035     | 0.0449    |
| 0.0124    | 0.0164    | 0.0238    | 0.0283    | 0.033     | 0.0296    | 0.0126    | 0.0122    | 0.0359    |
| 0.025     | 0.0028    | 0.0572    | 0.0301    | 0         | 0.011     | 0.0379    | 0.0108    | 0         |
| 0.0158    | 0.0057    | 0.003     | 0.0149    | 0.0164    | 0         | 0.0086    | 0.0033    | 0.0028    |
| 0.1705    | 0.1675    | 0.102     | 0.2493    | 0.0571    | 0.2229    | 0.006     | 0.1735    | 0.242     |
| 0.0336    | 0.0168    | 0.019     | 0.022     | 0.04      | 0.0275    | 0.0174    | 0.0272    | 0.0151    |
| 0.0637    | 0.0824    | 0.0569    | 0.0368    | 0.0637    | 0.0848    | 0.1146    | 0.0631    | 0.1444    |
| 0         | 0         | 0.0403    | 0         | 0.0059    | 0.004     | 0.0164    | 0         | 0         |
| 0         | 0         | 0         | 0         | 0         | 0         | 0         | 0         | 0         |
| 0         | 0         | 0         | 0         | 0.0031    | 0         | 0         | 0         | 0.0077    |
| 0.0783    | 0.0716    | 0.0827    | 0.1564    | 0.1492    | 0.1136    | 0.073     | 0.0974    | 0.202     |
| 0.2245    | 0.226     | 0.4345    | 0.1697    | 0.1312    | 0.2148    | 0.2121    | 0.2532    | 0         |
| 0         | 0.0061    | 0.0065    | 0         | 0.0015    | 0.0041    | 0.0018    | 0         | 0.0029    |
| 0.0113    | 0.0396    | 0.0715    | 0.0074    | 0.0124    | 0.0511    | 0.069     | 0.0741    | 0         |
| 0.2244    | 0.2784    | 0.158     | 0.265     | 0.2898    | 0.2647    | 0.2465    | 0.2569    | 0.2858    |
| 0.0382    | 0.0374    | 0.0494    | 0.0545    | 0.039     | 0.0389    | 0.0392    | 0.042     | 0.0357    |
| 0.0784    | 0.0365    | 0.0076    | 0.063     | 0.0688    | 0.0043    | 0         | 0.0283    | 0.0913    |
| 0.0949    | 0.1063    | 0.0773    | 0.1459    | 0.0363    | 0.1565    | 0.0268    | 0.0917    | 0.1447    |
| 0.0117    | 0.0552    | 0         | 0.084     | 0.0734    | 0.0701    | 0.0159    | 0.061     | 0.0979    |

|        |          |        |        |        |        |        |        |        |
|--------|----------|--------|--------|--------|--------|--------|--------|--------|
| 0.0055 | 0.0048   | 0.0062 | 0.0041 | 0.0044 | 0.0045 | 0.0054 | 0.0039 | 0.0058 |
| 0      | 0        | 0      | 0      | 0.0014 | 0.0016 | 0.0126 | 0      | 0      |
| 0      | 0.1062   | 0      | 0.1032 | 0.1142 | 0.1028 | 0      | 0.0541 | 0.1722 |
| 0      | 0        | 0      | 0.0043 | 0.0128 | 0      | 0      | 0      | 0.001  |
| 0.2169 | 0.2075   | 0.2023 | 0.2125 | 0.2309 | 0.2247 | 0.1955 | 0.1707 | 0.3017 |
| 0.0038 | 0        | 0      | 0.0203 | 0.0147 | 0.0059 | 0.018  | 0.0262 | 0.0237 |
| 0.0321 | 0        | 0.0243 | 0.0661 | 0.0759 | 0.0161 | 0.0113 | 0.0295 | 0      |
| 0.0378 | 0.0086   | 0.0346 | 0.0152 | 0.0317 | 0.0449 | 0.0252 | 0      | 0.042  |
| 0.0112 | 0.0332   | 0.0285 | 0.0328 | 0.0606 | 0.0403 | 0.0629 | 0.0435 | 0.0352 |
| 0.0093 | 0.0144   | 0      | 0      | 0.018  | 0.0067 | 0.0142 | 0      | 0.0093 |
| 0.0871 | 0.0575   | 0.096  | 0.0648 | 0.0743 | 0.0529 | 0.1046 | 0.0504 | 0.0417 |
| 0.1022 | 0.0807   | 0.1227 | 0.0664 | 0.0646 | 0.0608 | 0.0989 | 0.0799 | 0.089  |
| 0.1271 | 0.1549   | 0.0894 | 0.0878 | 0.1059 | 0.165  | 0.1518 | 0.1111 | 0.2568 |
| 0.0224 | 0.0073   | 0.0414 | 0.0264 | 0.0744 | 0.0671 | 0.0526 | 0.0039 | 0.0552 |
| 0.046  | 1.00E-04 | 0.0011 | 0      | 0.0018 | 0      | 0      | 0      | 0.0675 |
| 0.5266 | 0.5211   | 0.4275 | 0.5289 | 0.558  | 0.4875 | 0.5366 | 0.5191 | 0.6363 |
| 0      | 1.00E-04 | 0.0056 | 0.0421 | 0.0175 | 0.0283 | 0.0141 | 0.0026 | 0.0014 |
| 0.5266 | 0.5212   | 0.4332 | 0.5709 | 0.5755 | 0.5158 | 0.5507 | 0.5216 | 0.6378 |

| GSM110103 | GSM110104 | GSM110104 |
|-----------|-----------|-----------|-----------|-----------|-----------|-----------|-----------|-----------|-----------|
| 0.0054    | 0.0061    | 0.0067    | 0.0212    | 0         | 0         | 0         | 0.0252    | 0         |           |
| 0         | 0         | 0         | 0         | 0         | 0         | 0         | 0         | 0         |           |
| 0.1128    | 0.2202    | 0.1505    | 0.2218    | 0.0668    | 0.2122    | 0.2421    | 0.0781    | 0.0935    |           |
| 0.0475    | 0.0505    | 0         | 0         | 0         | 0.0468    | 0.0062    | 0.0503    | 0         |           |
| 0.016     | 0.1505    | 0.1189    | 0.1737    | 0.1915    | 0.1648    | 0.2388    | 0.0855    | 0.0528    |           |
| 0.0299    | 0.0706    | 0.0194    | 0.1271    | 0.1298    | 0.0415    | 0.1563    | 0.0474    | 0.0339    |           |
| 0.0196    | 0.0316    | 0.0293    | 0.0625    | 0.0912    | 0.0686    | 0.065     | 0.0218    | 0         |           |
| 0.0759    | 0.2189    | 0.1987    | 0.2847    | 0.2064    | 0.1651    | 0.2822    | 0.1312    | 0.1065    |           |
| 0         | 0.0529    | 0.0406    | 0.083     | 0.0985    | 0.0942    | 0.1472    | 0.0198    | 0.033     |           |
| 0.0649    | 0.1698    | 0.1149    | 0.1389    | 0.2098    | 0.1999    | 0.1792    | 0.1129    | 0.041     |           |
| 0         | 0.092     | 0.0864    | 0.0935    | 0.1023    | 0.1252    | 0.1045    | 0.0106    | 0.0072    |           |
| 0         | 0.0983    | 0.026     | 0.0383    | 0.095     | 0.1694    | 0         | 0.0176    | 0         |           |
| 0.0815    | 0.0344    | 0.0492    | 0.0922    | 0.0821    | 0.0187    | 0.1027    | 0.102     | 0.0701    |           |
| 0.0746    | 0.0886    | 0.105     | 0.1321    | 0.077     | 0.0739    | 0.1173    | 0.0805    | 0.0599    |           |
| 0.015     | 0         | 0.003     | 0         | 0.0126    | 0.0399    | 0         | 0.1644    | 0.0125    |           |
| 0.0473    | 0         | 0         | 0         | 0         | 0         | 0         | 0.0282    | 0         |           |
| 0.0595    | 0.1504    | 0.0813    | 0.0752    | 0.1083    | 0.1695    | 0.091     | 0.117     | 0.1118    |           |
| 0         | 0         | 0.0232    | 0         | 0         | 0.0044    | 0         | 0         | 0         |           |
| 0         | 0         | 0.0062    | 0         | 0.016     | 0.001     | 0         | 0         | 0         |           |
| 0.2925    | 0.2986    | 0.2667    | 0         | 0.3115    | 0.1943    | 0.0617    | 0.309     | 0.262     |           |
| 0.0617    | 0.0355    | 0.0417    | 0.016     | 0.0627    | 0.0452    | 0.0332    | 0.0534    | 0.0647    |           |
| 0.0325    | 0.1004    | 0.0624    | 0.1549    | 0.0571    | 0.0308    | 0.186     | 0.0423    | 0.1308    |           |
| 0         | 0         | 0         | 0.0054    | 0         | 0         | 0.0335    | 0         | 0         |           |
| 0.0313    | 0         | 0         | 0         | 0         | 0         | 0.0048    | 0.0129    | 0         |           |
| 0         | 0.0099    | 0.0363    | 0.0685    | 0         | 0         | 0.0331    | 0.0049    | 0         |           |
| 0         | 0.0028    | 0.005     | 0.015     | 9.00E-04  | 0         | 0.0204    | 0         | 0.0057    |           |
| 0         | 0         | 0         | 0.0041    | 0         | 0.0117    | 0         | 0         | 0.0086    |           |
| 0         | 0         | 0         | 0.0045    | 0.0998    | 0.0662    | 0.0399    | 0         | 0         |           |
| 0.1775    | 0.028     | 0         | 0         | 0.0418    | 0.1363    | 0.0084    | 0.1582    | 0.1433    |           |
| 0.0972    | 0.1244    | 0         | 0         | 0.2728    | 0.4207    | 0.0929    | 0.1304    | 0.1488    |           |
| 0.0898    | 0.0397    | 0.0419    | 0         | 0.0333    | 0.053     | 0.0101    | 0.0354    | 5.00E-04  |           |
| 0.0211    | 0.0099    | 0.0107    | 0.0127    | 9.00E-04  | 0.0218    | 0.01      | 0.002     | 0         |           |
| 0.0468    | 0         | 9.00E-04  | 0         | 0         | 0         | 0         | 0.0085    | 0         |           |
| 0         | 0.0201    | 0.0027    | 0         | 0         | 0.0087    | 0.0195    | 0.0145    | 6.00E-04  |           |
| 0.1679    | 0.2009    | 0.1993    | 0.2846    | 0.0847    | 0.0965    | 0.1246    | 0.1521    | 0.2713    |           |
| 0.0208    | 0.0207    | 0.0174    | 0.015     | 0.0325    | 0.0263    | 0.0279    | 0.0193    | 0.0259    |           |
| 0.0463    | 0.0919    | 0.0476    | 0.0928    | 0         | 0.0922    | 0.1075    | 0.0022    | 0.0194    |           |
| 0         | 0         | 0         | 0         | 0         | 0.0043    | 0         | 0         | 0.0048    |           |
| 0         | 0         | 0         | 0         | 0         | 0         | 0         | 0         | 0         |           |
| 0.0135    | 0         | 0.0102    | 0.0193    | 0         | 0         | 0.0063    | 0         | 0.0035    |           |
| 0         | 0.0822    | 0.1123    | 0.17      | 0.0211    | 0.0658    | 0.0177    | 0.1097    | 0         |           |
| 0.3907    | 0.0971    | 0.1688    | 0         | 0.2651    | 0.2026    | 0.0963    | 0.2622    | 0.364     |           |
| 0         | 0         | 0.0026    | 0.0147    | 0         | 0         | 0.0086    | 0         | 0         |           |
| 0.0706    | 0         | 0.0621    | 0         | 0.0294    | 0         | 0.0303    | 0.0712    | 0.0633    |           |
| 0.2255    | 0.2284    | 0.1531    | 0.175     | 0.3364    | 0.2928    | 0.1575    | 0.1823    | 0.1591    |           |
| 0.0252    | 0.0381    | 0.0296    | 0.0261    | 0.0698    | 0.0572    | 0.0325    | 0.0473    | 0.0405    |           |
| 0.0619    | 0.0511    | 0.028     | 0.0441    | 0.0582    | 0.0515    | 0.0123    | 0.0189    | 0.0244    |           |
| 0.0988    | 0.1106    | 0.1132    | 0.1528    | 0.0192    | 0.0595    | 0.0719    | 0.0961    | 0.1815    |           |
| 0.028     | 0.096     | 0.0845    | 0.1143    | 0.0412    | 0.0214    | 0.1026    | 0.051     | 0.0527    |           |

|        |        |        |        |          |          |          |          |        |
|--------|--------|--------|--------|----------|----------|----------|----------|--------|
| 0.001  | 0.0055 | 0.0019 | 0.0025 | 0.0036   | 0.0041   | 0.0065   | 9.00E-04 | 0.0065 |
| 0.0054 | 0.0021 | 0      | 0      | 9.00E-04 | 2.00E-04 | 0        | 0.0042   | 0.0042 |
| 0.0422 | 0.1276 | 0.1466 | 0.2473 | 0.0308   | 0        | 0.1635   | 0.0721   | 0.0476 |
| 0      | 0      | 0      | 0      | 0        | 0        | 0        | 0.0072   | 0      |
| 0.1446 | 0.2451 | 0.097  | 0.1336 | 0.2503   | 0.2965   | 0.1271   | 0.1239   | 0.1018 |
| 0.0392 | 0.0207 | 0.0753 | 0.0497 | 0        | 0        | 9.00E-04 | 0.0256   | 0      |
| 0      | 0.0474 | 0.0396 | 0      | 0.0174   | 0        | 0.0133   | 0.0512   | 0.082  |
| 0      | 0.0183 | 0      | 0.0383 | 0        | 0.0081   | 0.0431   | 0        | 0.0056 |
| 0.0364 | 0.0088 | 0.0237 | 0.0616 | 0.0054   | 0.0362   | 0        | 0.008    | 0.0237 |
| 0      | 0.0204 | 0.0701 | 0.0042 | 0.0282   | 0.0436   | 0        | 0        | 0      |
| 0.0042 | 0.0407 | 0.0439 | 0.0449 | 0.0736   | 0.1119   | 0.0381   | 0.0785   | 0.0553 |
| 0.0377 | 0.0692 | 0.0511 | 0.011  | 0.1337   | 0.1391   | 0.0316   | 0.0643   | 0.0531 |
| 0.0679 | 0.1348 | 0.1367 | 0.2046 | 0.0411   | 0.1461   | 0.1969   | 0.069    | 0.0883 |
| 0.0016 | 0.0153 | 0      | 0.0461 | 0        | 0.0269   | 0.0239   | 0        | 0.0211 |
| 0      | 0      | 0      | 0.0101 | 0        | 0.0298   | 5.00E-04 | 0        | 0.0149 |
| 0.4311 | 0.6541 | 0.5955 | 0.4696 | 0.5756   | 0.6021   | 0.5329   | 0.5442   | 0.3425 |
| 0.0027 | 0.0031 | 0.0064 | 0.0133 | 0.008    | 5.00E-04 | 0.0168   | 0.0126   | 0      |
| 0.4338 | 0.6571 | 0.6019 | 0.4829 | 0.5836   | 0.6026   | 0.5497   | 0.5568   | 0.3425 |

| GSM110104 | GSM110105 |
|-----------|-----------|-----------|-----------|-----------|-----------|-----------|-----------|-----------|
| 0.0195    | 0         | 0.0184    | 0         | 0.0083    | 0.0162    | 0         | 0.0176    | 0.0016    |
| 0         | 0         | 0         | 0         | 0         | 0         | 0         | 0         | 0         |
| 0.1026    | 0.2587    | 0.126     | 0.0874    | 0.2002    | 0.137     | 0.1896    | 0.1976    | 0.2087    |
| 2.00E-04  | 0.0343    | 0         | 0         | 0         | 0         | 0         | 0.0022    | 0         |
| 0.0994    | 0.1395    | 0.1416    | 0.1454    | 0.149     | 0.156     | 0.1754    | 0.1319    | 0.1428    |
| 0.0836    | 0.1019    | 0.0637    | 0.0761    | 0.1305    | 0.0497    | 0.0893    | 0.0849    | 0.0794    |
| 0.0577    | 0.0516    | 0.0203    | 0.0547    | 0.0587    | 0.0606    | 0.0542    | 0.0948    | 0.0239    |
| 0.149     | 0.1667    | 0.1975    | 0.1556    | 0.2389    | 0.2312    | 0.2315    | 0.1896    | 0.1963    |
| 0.0471    | 0.0586    | 0.0608    | 0.0838    | 0.0439    | 0.0314    | 0.0518    | 0         | 0.0826    |
| 0.0581    | 0.0776    | 0.094     | 0.1311    | 0.1599    | 0.0908    | 0.1435    | 0.0617    | 0.1747    |
| 0.0302    | 0.022     | 0.043     | 0.0638    | 0.0805    | 0.0431    | 0.0653    | 0.0294    | 0.0897    |
| 0.007     | 0         | 0.0122    | 0.0776    | 0.0396    | 0.0748    | 0.0831    | 0.0382    | 0.0325    |
| 0.0509    | 0.0469    | 0.0852    | 0.0291    | 0.0907    | 0.0367    | 0.0756    | 0.0559    | 0.0603    |
| 0.0288    | 0.0791    | 0.0969    | 0.0634    | 0.0995    | 0.1134    | 0.0972    | 0.09      | 0.0924    |
| 0         | 0.0794    | 0         | 0         | 0         | 0.0337    | 0.011     | 0.0451    | 0         |
| 0         | 0         | 0.0067    | 0         | 0         | 0         | 0         | 0         | 0         |
| 0.1108    | 0.1106    | 0.0453    | 0.1042    | 0.1274    | 0.0975    | 0.0844    | 0.1151    | 0.0535    |
| 0         | 0.0217    | 0         | 0         | 0         | 0.0157    | 0         | 0.0266    | 0         |
| 0.0016    | 0         | 0         | 0.0138    | 0         | 0.0078    | 0.0056    | 0.0018    | 0         |
| 0.2252    | 0.2085    | 0.2468    | 0.2598    | 0.097     | 0.3029    | 0.2275    | 0.1428    | 0.1699    |
| 0.0703    | 0.0544    | 0.0247    | 0.0567    | 0.0466    | 0.0438    | 0.0134    | 0.0577    | 0.0423    |
| 0.1334    | 0.1077    | 0.0894    | 0.0795    | 0.1589    | 0.0252    | 0.0454    | 0.0575    | 0.0714    |
| 0.0645    | 0         | 0.0265    | 0         | 0.0199    | 0.0138    | 0.0121    | 0.0786    | 0         |
| 0         | 0.0355    | 0         | 0         | 0         | 0.0385    | 0.0078    | 0         | 0         |
| 0.0593    | 0.0031    | 0.0333    | 0         | 0.0679    | 0         | 0.0075    | 0.0249    | 0.0273    |
| 0.0112    | 0         | 0.0067    | 0.0037    | 0.0126    | 0.0058    | 0.012     | 0.0116    | 0.014     |
| 0.0127    | 0         | 0.0034    | 0.008     | 0.0156    | 0.0045    | 0         | 0.0167    | 0.0069    |
| 0         | 0         | 0         | 0         | 0         | 0.0199    | 0.0201    | 0         | 0         |
| 0.0106    | 0.1514    | 0.0226    | 0.0164    | 0         | 0.0284    | 0.0683    | 0.02      | 0.0056    |
| 0.0785    | 0.1861    | 0.0623    | 0.2602    | 0.1466    | 0.0371    | 0.1261    | 0.0489    | 0.1781    |
| 0.0367    | 0.0728    | 0.0347    | 0.0272    | 0.0022    | 0.0653    | 0.0753    | 0.0517    | 8.00E-04  |
| 0.0177    | 0         | 0.0116    | 0         | 0.0108    | 0.0219    | 0.0318    | 0.0072    | 0         |
| 0.071     | 0.0141    | 0.0036    | 0         | 0         | 0.0054    | 0         | 0.0811    | 0         |
| 0         | 0.0165    | 0.0034    | 0         | 0.0025    | 0.0104    | 0.0018    | 0.0187    | 0.0059    |
| 0.2344    | 0.1764    | 0.197     | 0.1137    | 0.1652    | 0.2303    | 0.2865    | 0.1202    | 0.2174    |
| 0.0123    | 0.0248    | 0.0243    | 0.0274    | 0.0365    | 0.0207    | 0.0177    | 0.0271    | 0.0311    |
| 0.033     | 0.0988    | 0.0425    | 0.0213    | 0.0858    | 0.0246    | 0.058     | 0.0818    | 0.0922    |
| 0.0135    | 0         | 0         | 0         | 0.0028    | 0         | 0         | 0.0153    | 0         |
| 0         | 0         | 0         | 0         | 0         | 0         | 0         | 0         | 0         |
| 0.008     | 0         | 0.0066    | 0         | 0.013     | 2.00E-04  | 0         | 0.0197    | 0.0013    |
| 0.0553    | 0         | 0.1095    | 0.0539    | 0.0891    | 0.1236    | 0.1067    | 0.0682    | 0.0589    |
| 0.3989    | 0.2863    | 0.0727    | 0.2705    | 0.1769    | 0.1313    | 0.04      | 0.2939    | 0.1706    |
| 0         | 0         | 0.0102    | 0         | 0.0055    | 3.00E-04  | 6.00E-04  | 0.0037    | 0.0022    |
| 0.0439    | 0.0186    | 0.0316    | 0.0879    | 3.00E-04  | 0.0148    | 0         | 0.0682    | 0.0214    |
| 0.1786    | 0.2609    | 0.173     | 0.2693    | 0.1678    | 0.2502    | 0.278     | 0.0585    | 0.1662    |
| 0.0662    | 0.0247    | 0.0367    | 0.0547    | 0.0367    | 0.0473    | 0.0327    | 0.059     | 0.0272    |
| 0.0697    | 0.0533    | 0.0234    | 0.0308    | 0.0627    | 0.052     | 0.0977    | 0.0058    | 0.023     |
| 0.1481    | 0.1116    | 0.157     | 0.0726    | 0.1326    | 0.1374    | 0.1743    | 0.0449    | 0.1522    |
| 0.0673    | 0.0518    | 0.0723    | 0.0355    | 0.0609    | 0.0981    | 0.0926    | 0.0646    | 0.0791    |



|        |        |        |        |        |        |        |        |          |
|--------|--------|--------|--------|--------|--------|--------|--------|----------|
| 0.0031 | 0.0036 | 0.006  | 0.0041 | 0.0045 | 0.0049 | 0.0019 | 0.0045 | 0.004    |
| 0.0325 | 0      | 0      | 0      | 0.0042 | 0      | 0      | 0      | 0        |
| 0.0249 | 0.0355 | 0.1699 | 0      | 0.148  | 0.18   | 0.1516 | 0.0952 | 0.0929   |
| 0      | 0      | 0      | 0      | 0      | 0      | 0.0125 | 0      | 7.00E-04 |
| 0.195  | 0.1985 | 0.1075 | 0.1789 | 0.1459 | 0.1578 | 0.2034 | 0.1396 | 0.1486   |
| 0      | 0.0062 | 0.0366 | 0.0125 | 0.0171 | 0.0588 | 0.0314 | 0.0226 | 0.0342   |
| 0      | 0.0319 | 0.0194 | 0.017  | 0.0127 | 0.0654 | 0.0435 | 0.0733 | 0.0582   |
| 0.0087 | 0.002  | 0      | 0.0114 | 0.0345 | 0.0094 | 0.0232 | 0.029  | 0.0133   |
| 0.0148 | 0.0286 | 0.0081 | 0      | 0.0324 | 0.0234 | 0.0086 | 0.0183 | 0.0356   |
| 0.0287 | 0.0321 | 0.006  | 0.0169 | 0.008  | 0.0228 | 0.0059 | 0.0331 | 0.0127   |
| 0.1081 | 0.0296 | 0.0431 | 0.0873 | 0.0598 | 0.0738 | 0.0687 | 0.0819 | 0.0617   |
| 0.0749 | 0.0508 | 0.0328 | 0.1052 | 0.0415 | 0.0477 | 0.0633 | 0.0352 | 0.0496   |
| 0.0386 | 0.2038 | 0.1272 | 0.0649 | 0.1439 | 0.1095 | 0.1267 | 0.1642 | 0.1877   |
| 0.0389 | 0      | 0.0146 | 0      | 0.0591 | 0      | 0.027  | 0.0157 | 0.0095   |
| 0      | 0      | 0      | 0      | 0      | 0      | 0.009  | 0      | 0.0055   |
| 0.4141 | 0.5426 | 0.5251 | 0.5285 | 0.4668 | 0.611  | 0.6132 | 0.5116 | 0.5221   |
| 0.0428 | 0      | 0.0224 | 0.0069 | 0.0141 | 0.0189 | 0.0088 | 0.049  | 8.00E-04 |
| 0.4569 | 0.5426 | 0.5475 | 0.5354 | 0.4809 | 0.6299 | 0.622  | 0.5606 | 0.5229   |

| GSM110105 |
|-----------|-----------|-----------|-----------|-----------|-----------|-----------|-----------|-----------|-----------|
| 0.0064    | 0.0104    | 0.0204    | 0         | 0.0068    | 0.0148    | 0.0084    | 0.0162    | 0.0191    |           |
| 0         | 0         | 0         | 0         | 0         | 0         | 0         | 0         | 0         |           |
| 0.1909    | 0.1461    | 0.1463    | 0.0784    | 0.0254    | 0.2192    | 0.2168    | 0.0489    | 0.2419    |           |
| 0         | 0         | 0         | 0.0307    | 0         | 0.0367    | 0         | 0         | 0.0189    |           |
| 0.1179    | 0.1073    | 0.0921    | 0.0469    | 0.0377    | 0.1412    | 0.1223    | 0.1921    | 0.1108    |           |
| 0.0702    | 0.046     | 0         | 0.0473    | 0.05      | 0.1121    | 0.0603    | 0.0795    | 0         |           |
| 0.0705    | 0.0329    | 0.0554    | 0.0126    | 0.0304    | 0.0704    | 0.0342    | 0.0575    | 0.0156    |           |
| 0.1405    | 0.1866    | 0.1463    | 0.1254    | 0.105     | 0.1777    | 0.1846    | 0.2303    | 0.1606    |           |
| 0.0681    | 0.0111    | 0.0164    | 0.0397    | 0.0158    | 0.0719    | 0.0449    | 0.0877    | 0.0586    |           |
| 0.1487    | 0.1202    | 0.1286    | 0.0934    | 0.0756    | 0.0822    | 0.109     | 0.1798    | 0.176     |           |
| 0.1006    | 0.0829    | 0.0702    | 0.0421    | 0.0513    | 0.0382    | 0.0654    | 0.1264    | 0.1182    |           |
| 0.1155    | 0.0775    | 0.0895    | 0         | 0         | 0.0837    | 0.0387    | 0.0537    | 0.0518    |           |
| 0.0489    | 0.0526    | 0.0527    | 0.1031    | 0.0507    | 0.0481    | 0.063     | 0.0602    | 0.0518    |           |
| 0.0919    | 0.1495    | 0.0879    | 0.0176    | 0.0399    | 0.0718    | 0.0672    | 0.1429    | 0.1153    |           |
| 0         | 0.0196    | 0.0066    | 0         | 0         | 0         | 0         | 0         | 0         |           |
| 0         | 0         | 0         | 0.0526    | 0.0209    | 0         | 0.0057    | 0         | 0.0153    |           |
| 0.1163    | 0.0669    | 0.049     | 0.1114    | 0.0587    | 0.0925    | 0.1336    | 0.035     | 0.0923    |           |
| 0         | 0         | 0.0048    | 0         | 0         | 0.0103    | 0.0093    | 0.023     | 0         |           |
| 0.0136    | 0.0014    | 0.0035    | 0.0304    | 0.0073    | 0.0218    | 0.0109    | 0.0195    | 0         |           |
| 0.0964    | 0.2324    | 0.1518    | 0.2446    | 0.2327    | 0.1007    | 0.072     | 0.111     | 0.1081    |           |
| 0.0518    | 0.0336    | 0.0547    | 0.0569    | 0.0701    | 0.0477    | 0.0514    | 0.0213    | 0.0326    |           |
| 0.0985    | 0.0415    | 0.0553    | 0.1751    | 0.106     | 0.052     | 0.063     | 0.1211    | 0.0531    |           |
| 0         | 0.0234    | 0.0023    | 0         | 0         | 0         | 0         | 0.0303    | 0         |           |
| 0         | 0         | 0         | 0         | 0         | 0         | 0         | 0.0045    | 0         |           |
| 0         | 0         | 0         | 0.0185    | 0         | 0         | 0.0013    | 0         | 0.0422    |           |
| 0.0118    | 0.0152    | 0.0154    | 0.0121    | 0.0154    | 0.0081    | 0.0153    | 0.0156    | 0.0012    |           |
| 0.003     | 0         | 0         | 0.0072    | 0.0299    | 0.008     | 0.0015    | 0         | 0         |           |
| 0.0792    | 0.0068    | 0         | 0         | 0         | 0.0998    | 0.0132    | 0.0213    | 0         |           |
| 0.0116    | 0         | 0.071     | 0.0047    | 0         | 0.0639    | 0.0045    | 0.0146    | 0         |           |
| 0.1631    | 0.0948    | 0.1626    | 0.012     | 0.1586    | 0.1922    | 0.1788    | 0.1649    | 0.0294    |           |
| 0.0411    | 0.0762    | 0.086     | 0.0177    | 0.0396    | 0.0474    | 0.0626    | 0.1013    | 0.0251    |           |
| 0.0248    | 0.0302    | 0.0221    | 0.0098    | 0.0109    | 0.0163    | 0.0379    | 0.0443    | 0.0031    |           |
| 0         | 0.0144    | 0.0397    | 0.0207    | 0.0245    | 0         | 0.0236    | 0.0383    | 0         |           |
| 0.0104    | 0         | 0.0038    | 0.0157    | 0         | 0.0145    | 0.0023    | 0         | 0.0047    |           |
| 0.1903    | 0.1757    | 0.0769    | 0.2573    | 0.2683    | 0.2094    | 0.1949    | 0.1528    | 0.1565    |           |
| 0.0205    | 0.0186    | 0.0223    | 0.0177    | 0.0272    | 0.0239    | 0.023     | 0.0154    | 0.0244    |           |
| 0.0558    | 0.034     | 0.0652    | 0         | 0.0145    | 0.1129    | 0.0769    | 0.0046    | 0.1039    |           |
| 0         | 0         | 0         | 0         | 0.01      | 0.0122    | 0         | 0         | 0         |           |
| 0         | 0         | 0.0329    | 0         | 0         | 0         | 0.001     | 0         | 0         |           |
| 0         | 0.0102    | 0         | 0.0054    | 0         | 0         | 4.00E-04  | 0.0041    | 0.0121    |           |
| 0.1324    | 0.1227    | 0.1073    | 0.0016    | 0         | 0.0524    | 0.0696    | 0.0409    | 0.0811    |           |
| 0.2365    | 0.1515    | 0.2596    | 0.3525    | 0.3541    | 0.2139    | 0.2326    | 0.0773    | 0.1605    |           |
| 5.00E-04  | 0         | 3.00E-04  | 0.0022    | 0.0012    | 8.00E-04  | 0         | 0.0075    | 0.0058    |           |
| 0.0247    | 0.0446    | 0.0768    | 0.0741    | 0.0659    | 0.0527    | 0.0605    | 0.0153    | 0.0554    |           |
| 0.2971    | 0.2244    | 0.2604    | 0.0561    | 0.1523    | 0.3071    | 0.2273    | 0.3362    | 0.1706    |           |
| 0.0411    | 0.0547    | 0.052     | 0.0111    | 0.0502    | 0.0525    | 0.0456    | 0.0498    | 0.0165    |           |
| 0.0803    | 0.1047    | 0.005     | 0.0398    | 0.0264    | 0.0446    | 0.0685    | 0.1081    | 0.026     |           |
| 0.1225    | 0.1311    | 0.0358    | 0.1513    | 0.157     | 0.1356    | 0.0899    | 0.1098    | 0.1057    |           |
| 0.0761    | 0.0959    | 0.056     | 0.0274    | 0.0188    | 0.0417    | 0.0779    | 0.0922    | 0.0863    |           |

|        |        |        |        |          |        |        |          |        |
|--------|--------|--------|--------|----------|--------|--------|----------|--------|
| 0.0036 | 0.0024 | 0.0034 | 0.0038 | 0.003    | 0.0058 | 0.0016 | 0.0038   | 0.0032 |
| 0      | 0.0025 | 0      | 0.0074 | 0.0042   | 0.0019 | 0.0021 | 0        | 0      |
| 0.0927 | 0.1675 | 0.0717 | 0.0841 | 0.0376   | 0.0561 | 0.0794 | 0.1472   | 0.1379 |
| 0      | 0.0443 | 0.0032 | 0      | 0        | 0      | 0      | 0.0011   | 0      |
| 0.2593 | 0.1398 | 0.1498 | 0.0869 | 0.1098   | 0.1972 | 0.1759 | 0.2303   | 0.1272 |
| 0.0046 | 0.1335 | 0.0244 | 0.0518 | 0.0288   | 0.021  | 0.0578 | 0.0487   | 0.0563 |
| 0      | 0.0191 | 0.0742 | 0      | 0        | 0.0079 | 0.0297 | 9.00E-04 | 0.0072 |
| 0.012  | 0.0062 | 0      | 0.0048 | 6.00E-04 | 0.0527 | 0.0348 | 0.0278   | 0.0224 |
| 0.0258 | 0.0072 | 0.0506 | 0      | 0        | 0.053  | 0.0189 | 0.0511   | 0.0209 |
| 0.0162 | 0      | 0.0172 | 0.0032 | 0.0041   | 0      | 0.0161 | 0        | 0      |
| 0.0694 | 0.0723 | 0.0424 | 0.0756 | 0.0882   | 0.0754 | 0.0767 | 0.0574   | 0.0103 |
| 0.099  | 0.0498 | 0.0707 | 0.0863 | 0.079    | 0.1018 | 0.0632 | 0.0708   | 0.0359 |
| 0.1448 | 0.0966 | 0.1464 | 0.021  | 0.0216   | 0.1805 | 0.155  | 0.019    | 0.2047 |
| 0.0382 | 0.0102 | 0.014  | 0      | 0        | 0.0214 | 0.047  | 0.0566   | 0.0426 |
| 0.0154 | 0.0015 | 0      | 0      | 0        | 0.0047 | 0      | 0        | 0.0033 |
| 0.5083 | 0.5663 | 0.5536 | 0.3816 | 0.3179   | 0.4804 | 0.4836 | 0.4749   | 0.5354 |
| 0.01   | 0.0176 | 0.0131 | 0.0152 | 0.007    | 0.0183 | 0.0096 | 0.033    | 0.0096 |
| 0.5183 | 0.5839 | 0.5667 | 0.3968 | 0.325    | 0.4987 | 0.4932 | 0.5079   | 0.5449 |

| GSM110106 |
|-----------|-----------|-----------|-----------|-----------|-----------|-----------|-----------|-----------|
| 2.00E-04  | 0         | 0         | 0.004     | 0.0186    | 0.0035    | 0.0192    | 0.0059    | 0         |
| 0         | 0         | 0         | 0         | 0         | 0         | 0         | 0         | 0         |
| 0.1424    | 0.1222    | 0.2215    | 0.0668    | 0.1547    | 0.1594    | 0.1869    | 0         | 0.2293    |
| 0         | 0         | 0.0747    | 0.0318    | 0         | 0         | 0.006     | 0.021     | 0         |
| 0.0417    | 0.1329    | 0.1171    | 0.0689    | 0.1897    | 0.1262    | 0.1071    | 0         | 0.1927    |
| 0.0544    | 0.0614    | 0.0313    | 0         | 0.1134    | 0.0074    | 0         | 0         | 0.0801    |
| 0.0332    | 0.0837    | 0.0193    | 0.0053    | 0.1032    | 0.0169    | 0.0221    | 0         | 0.0805    |
| 0.1166    | 0.2324    | 0.149     | 0.1121    | 0.2556    | 0.1677    | 0.1972    | 0         | 0.2554    |
| 0         | 0         | 0.0727    | 0.0402    | 0.0567    | 0.0834    | 0         | 0         | 0.0534    |
| 0.0638    | 0.1198    | 0.0974    | 0.0865    | 0.1235    | 0.1697    | 0.1107    | 0         | 0.124     |
| 0.0135    | 0.0763    | 0.0558    | 0.0247    | 0.0798    | 0.1119    | 0.0751    | 0         | 0.0914    |
| 0         | 0.0568    | 0.0406    | 0.1272    | 0.1014    | 0.1357    | 0.0877    | 0.0761    | 0.0692    |
| 0.0567    | 0.0446    | 0.0621    | 0         | 0.0262    | 0.0231    | 0.0257    | 0         | 0.0475    |
| 0.0828    | 0.104     | 0.1093    | 0.0975    | 0.1113    | 0.0971    | 0.1236    | 0         | 0.1312    |
| 0.01      | 0         | 0         | 0.0626    | 0         | 0         | 0.0528    | 0.1552    | 0         |
| 0         | 0         | 0.0415    | 0         | 0         | 0         | 0.0451    | 0.0417    | 0         |
| 0.0731    | 0.0628    | 0.1235    | 0.0479    | 0.1319    | 0.092     | 0.0607    | 0.0666    | 0.0821    |
| 0         | 0.009     | 0         | 0.0407    | 0.0097    | 0.0034    | 0         | 0         | 0.0074    |
| 0.0172    | 0.0092    | 0         | 0.0178    | 0         | 0.0045    | 0         | 0         | 0         |
| 0.2382    | 0.0352    | 0.1305    | 0.3397    | 0.1872    | 0.116     | 0.2051    | 0.2805    | 0.0524    |
| 0.0536    | 0.0431    | 0.055     | 0.0543    | 0.0297    | 0.0377    | 0.0229    | 0.0314    | 0.0284    |
| 0.0789    | 0.0881    | 0.0546    | 0.0969    | 0.0488    | 0.0098    | 0         | 0.1171    | 0.0275    |
| 0.0073    | 0.0363    | 0.0023    | 0.0267    | 0         | 0.0021    | 0         | 0         | 0         |
| 0         | 0         | 0         | 0.0109    | 0         | 0         | 0.0665    | 0         | 0.0071    |
| 0         | 0.0189    | 0.01      | 0.0057    | 0.0353    | 0         | 0.019     | 0         | 0.0097    |
| 0.0151    | 0.0027    | 0         | 0.004     | 0.0102    | 0.0149    | 0.0118    | 0         | 0.0182    |
| 0         | 0.0041    | 0.0103    | 0.006     | 0.0061    | 0.0035    | 0         | 0.0167    | 0.0016    |
| 0         | 0         | 0         | 0.0794    | 0.0138    | 0.0678    | 0         | 0         | 0.0274    |
| 0.0196    | 0         | 0         | 0.0777    | 0.0147    | 0.0373    | 0.1369    | 0.3655    | 0         |
| 0.1671    | 0.1543    | 0.1853    | 0.2042    | 0.1947    | 0.1878    | 0         | 0.1165    | 0.1367    |
| 0.0345    | 0.0557    | 0.0703    | 0.0585    | 0.0364    | 0.0703    | 0.0557    | 0.0744    | 0.0883    |
| 0.0025    | 0.0411    | 0.0393    | 0.0213    | 0.02      | 0.0279    | 0.0229    | 0.0171    | 0.0509    |
| 0.0319    | 0.0028    | 0.0406    | 0.0236    | 0         | 0.0133    | 0.0205    | 0.0168    | 0.0136    |
| 0.005     | 0         | 0.0069    | 0.0185    | 0         | 0.0083    | 0.0079    | 0.0051    | 0.0033    |
| 0.2533    | 0.2854    | 0.1339    | 0.0042    | 0.1784    | 0.1648    | 0.099     | 0.2648    | 0.2782    |
| 0.0285    | 0.0174    | 0.0343    | 0.0268    | 0.0176    | 0.0229    | 0.0159    | 0.0228    | 0.0153    |
| 0.0592    | 0.0601    | 0.0993    | 0.0279    | 0.0576    | 0.0516    | 0.0493    | 0         | 0.1075    |
| 0         | 0         | 0         | 0.004     | 0.0045    | 0         | 0         | 0.0246    | 0         |
| 0         | 0.0011    | 0         | 0         | 0         | 0         | 0         | 0         | 0         |
| 0         | 0.007     | 0         | 0.0011    | 0         | 0         | 0.0071    | 0.0014    | 0         |
| 0         | 0.1515    | 0.1015    | 0.1912    | 0.1173    | 0.1298    | 0.1853    | 0.0659    | 0.126     |
| 0.3106    | 0.1625    | 0.2051    | 0.2547    | 0.0799    | 0.1461    | 0.0405    | 0.3642    | 0.0273    |
| 0         | 0.0023    | 0         | 0         | 0         | 0         | 0.0047    | 0.003     | 0.0012    |
| 0.0681    | 0.0225    | 0.0185    | 0.0312    | 0.0133    | 0.044     | 0.0616    | 0.1105    | 0.005     |
| 0.1745    | 0.2373    | 0.2343    | 0.2971    | 0.2469    | 0.2813    | 0.2333    | 0.0695    | 0.282     |
| 0.0573    | 0.0422    | 0.0442    | 0.0637    | 0.0511    | 0.0494    | 0.0051    | 0.0453    | 0.0309    |
| 0         | 0.0871    | 0         | 0.0056    | 0.0511    | 0.0975    | 0.0209    | 0.0363    | 0.0706    |
| 0.1508    | 0.1836    | 0.0877    | 0         | 0.1146    | 0.121     | 0.0737    | 0.1081    | 0.1535    |
| 0.0379    | 0.0894    | 0.0588    | 0.056     | 0.0821    | 0.0749    | 0.098     | 0         | 0.0861    |

|        |          |        |          |        |        |        |          |        |
|--------|----------|--------|----------|--------|--------|--------|----------|--------|
| 0.0015 | 0.0044   | 0      | 0.0052   | 0.0037 | 0.0022 | 0      | 0.0028   | 0.003  |
| 0.01   | 3.00E-04 | 0      | 0.017    | 0      | 0      | 0      | 0.0074   | 0      |
| 0.0624 | 0.1724   | 0.0919 | 0.0078   | 0.1197 | 0.0972 | 0.1353 | 0        | 0.1904 |
| 0      | 0        | 0      | 0        | 0      | 0.0268 | 0.0196 | 0        | 0.0024 |
| 0.1823 | 0.1968   | 0.1925 | 0.2093   | 0.2265 | 0.2406 | 0.1182 | 0.1462   | 0.2112 |
| 0.0126 | 0.0504   | 0      | 0.0093   | 0.0158 | 0.0161 | 0.0862 | 0.0109   | 0.0128 |
| 0.0076 | 0.0331   | 0      | 0.0494   | 0.0256 | 0.0268 | 0.0303 | 0        | 0.0282 |
| 0.002  | 0.0181   | 0.0198 | 0.0211   | 0.004  | 0.0178 | 0.0099 | 0        | 0.0287 |
| 0.0369 | 0.0566   | 0      | 0.0785   | 0.04   | 0.043  | 0.0115 | 0        | 0.0522 |
| 0      | 0.0137   | 0.0097 | 0.0477   | 0.0419 | 0      | 0      | 0        | 0      |
| 0.0876 | 0.0725   | 0.065  | 0.0519   | 0.06   | 0.0561 | 0.0111 | 0.0671   | 0.0406 |
| 0.0813 | 0.069    | 0.0709 | 0.0919   | 0.0876 | 0.083  | 0      | 0.078    | 0.029  |
| 0.1285 | 0.0749   | 0.1776 | 0.0435   | 0.0969 | 0.1031 | 0.1669 | 0        | 0.1319 |
| 0.02   | 0.0633   | 0.0616 | 2.00E-04 | 0.0505 | 0.0347 | 0.0169 | 2.00E-04 | 0.0543 |
| 0      | 0        | 0      | 0        | 0.0165 | 0      | 0.0245 | 0.0488   | 0.0174 |
| 0.3958 | 0.4333   | 0.5091 | 0.6013   | 0.5545 | 0.5514 | 0.6135 | 0.3576   | 0.5523 |
| 0.0124 | 0.0228   | 0.0012 | 0.0242   | 0.0093 | 0.005  | 0.0096 | 0.003    | 0      |
| 0.4082 | 0.456    | 0.5103 | 0.6256   | 0.5638 | 0.5564 | 0.6231 | 0.3606   | 0.5523 |

| GSM110106 | GSM110107 |
|-----------|-----------|-----------|-----------|-----------|-----------|-----------|-----------|-----------|
| 0         | 0         | 0.0423    | 0.0236    | 0.0267    | 0         | 0         | 0         | 0.0046    |
| 0         | 0         | 0         | 0         | 0         | 0         | 0         | 0         | 0         |
| 0.223     | 0.1827    | 0.0897    | 0.0848    | 0.182     | 0.0754    | 0.1132    | 0.2613    | 0.0802    |
| 0         | 0         | 0.048     | 0         | 0         | 0         | 0         | 0         | 0.0059    |
| 0.0764    | 0.2088    | 0.0928    | 0.1984    | 0.1834    | 0.0538    | 0.1214    | 0.1477    | 0.1241    |
| 0.0493    | 0.0745    | 0.0764    | 0.0875    | 0.0713    | 0.0408    | 0.0676    | 0.0679    | 0.0451    |
| 0.061     | 0.0397    | 0.0261    | 0.0616    | 0.0589    | 0.0098    | 0.0287    | 0.0224    | 0.0704    |
| 0.1011    | 0.2655    | 0.1384    | 0.28      | 0.2469    | 0.0673    | 0.1844    | 0.2068    | 0.2016    |
| 0.0414    | 0.0726    | 0.0277    | 0.0769    | 0.061     | 0.0204    | 0.0149    | 0.0668    | 0.0416    |
| 0.1039    | 0.1938    | 0.1327    | 0.1541    | 0.1598    | 0.0373    | 0.1832    | 0.1716    | 0.1067    |
| 0.0305    | 0.1318    | 0.058     | 0.105     | 0.0906    | 0.0112    | 0.1041    | 0.1292    | 0.0644    |
| 0.1116    | 0.0948    | 0.0627    | 0.1124    | 0.0676    | 0.01      | 0.1244    | 0.1138    | 0.0846    |
| 0.033     | 0.0603    | 0.0812    | 0.0166    | 0.0529    | 0.0655    | 0.0397    | 0.0504    | 0.0388    |
| 0.0713    | 0.0989    | 0.09      | 0.1149    | 0.1207    | 0.0414    | 0.1058    | 0.1007    | 0.1133    |
| 0         | 0         | 0.0326    | 0         | 0         | 0         | 0.0122    | 0         | 0         |
| 0         | 0.0538    | 0         | 0.0286    | 0         | 0         | 0         | 0.0214    | 0         |
| 0.0928    | 0.1187    | 0.0851    | 0.0536    | 0.0818    | 0.0937    | 0.1025    | 0.1268    | 0.0728    |
| 0.026     | 0.0112    | 0         | 0.0107    | 0.0081    | 0.0102    | 0.0244    | 0.0089    | 0.0061    |
| 0.0105    | 0.0092    | 0.0157    | 6.00E-04  | 0.0214    | 0         | 0.0044    | 0.0064    | 0.0056    |
| 0.1718    | 0.0251    | 0.2115    | 0         | 0.1175    | 0.4771    | 0.3174    | 0         | 0.1829    |
| 0.0536    | 0.0389    | 0.0377    | 0.0366    | 0.0267    | 0.0661    | 0.0333    | 0.0339    | 0.0342    |
| 0.168     | 0.0413    | 0.0789    | 0.089     | 0.0852    | 0.137     | 0.0395    | 0.1924    | 0.0391    |
| 0.0232    | 0.0042    | 0.0014    | 0.0219    | 0.0123    | 0.0026    | 0.012     | 0.0365    | 0.0375    |
| 0         | 0         | 0         | 0         | 0         | 0         | 0.0179    | 0         | 0         |
| 0         | 0.0279    | 0.0013    | 0.0278    | 0.0204    | 0         | 0.0085    | 0.0167    | 0         |
| 0.0086    | 0.013     | 0.0149    | 0.0168    | 0.0139    | 0         | 0.0111    | 0.0173    | 0.0058    |
| 0.0024    | 0.0088    | 0.0058    | 0.0106    | 0         | 0         | 0         | 0         | 0.0115    |
| 0.0335    | 0         | 0.016     | 0         | 0         | 0         | 0.0336    | 0.0069    | 0         |
| 0.0445    | 0.0466    | 0.0962    | 0         | 0.0127    | 0.0396    | 0.0219    | 0         | 0.0041    |
| 0.2584    | 0.0975    | 0.0834    | 0.0914    | 0.0576    | 0.1484    | 0.1205    | 0.0911    | 4.00E-04  |
| 0.0463    | 0.0452    | 0.0665    | 0.0579    | 0.0341    | 0.021     | 0.0447    | 0.0338    | 0.0597    |
| 0.0221    | 0.02      | 0.025     | 0.0274    | 0.0192    | 0         | 0.012     | 0.0253    | 0.029     |
| 6.00E-04  | 0.0117    | 0.0275    | 0         | 0         | 0         | 0         | 0.0234    | 0.0154    |
| 0.0139    | 5.00E-04  | 0.0165    | 0         | 0.001     | 0.0088    | 0.0128    | 0         | 0.0074    |
| 0.1283    | 0.1866    | 0.3372    | 0.1769    | 0.1489    | 0.1934    | 0.1837    | 0.0419    | 0.2829    |
| 0.0263    | 0.0122    | 0.0219    | 0.0365    | 0.0271    | 0.0272    | 0.0212    | 0.0261    | 0.0201    |
| 0.1064    | 0.0608    | 0.0148    | 0.0304    | 0.0643    | 0         | 0.0186    | 0.1057    | 0         |
| 0.0051    | 0         | 0         | 0         | 0         | 0         | 0         | 0         | 0.0037    |
| 0         | 0         | 0         | 0         | 0         | 0         | 0         | 0         | 0         |
| 0         | 0         | 0         | 0.0086    | 0         | 0.0044    | 0.0052    | 0.0035    | 0.0135    |
| 0.1031    | 0.1017    | 0.0484    | 0.1546    | 0.0904    | 0.0075    | 0.1184    | 0.1853    | 0.1983    |
| 0.3106    | 0.1147    | 0.1449    | 0.0707    | 0.0684    | 0.3474    | 0.1565    | 0.1141    | 0.1205    |
| 0         | 0.0047    | 0         | 0.0086    | 0.0069    | 0         | 0.0032    | 0.0089    | 0         |
| 0.0442    | 0.0221    | 0.0414    | 0.0176    | 0.0367    | 0.0575    | 0.018     | 0.0112    | 0.0058    |
| 0.2602    | 0.2093    | 0.2567    | 0.1973    | 0.2401    | 0.1767    | 0.2422    | 0.2576    | 0.1974    |
| 0.051     | 0.0167    | 0.0647    | 0.0244    | 0.0407    | 0.0374    | 0.0484    | 0.0386    | 0.0449    |
| 0.0354    | 0.059     | 0.0538    | 0.027     | 0.0389    | 0.0462    | 0.0604    | 0.0777    | 0.036     |
| 0.0708    | 0.0926    | 0.2112    | 0.1029    | 0.1036    | 0.1144    | 0.1019    | 0.0193    | 0.1641    |
| 0.0375    | 0.0985    | 0.0579    | 0.103     | 0.0974    | 0.0149    | 0.0574    | 0.1033    | 0.0894    |

|          |        |        |        |        |        |        |        |        |
|----------|--------|--------|--------|--------|--------|--------|--------|--------|
| 0.0049   | 0.0028 | 0.0044 | 0.0035 | 0.0031 | 0.0036 | 0.0017 | 0.0028 | 0.003  |
| 0        | 0      | 0.01   | 0      | 0      | 0      | 0      | 0      | 0.0029 |
| 0.0055   | 0.1175 | 0.1088 | 0.1672 | 0.1788 | 0.0378 | 0.1373 | 0.1047 | 0.1835 |
| 0        | 0.025  | 0      | 0.0119 | 0.0059 | 0      | 0.0135 | 0      | 0.0165 |
| 0.2037   | 0.1096 | 0.2559 | 0.1409 | 0.1546 | 0.1781 | 0.1957 | 0.2033 | 0.1435 |
| 0.0058   | 0.0563 | 0.0163 | 0.0408 | 0.0599 | 0      | 0.0278 | 0.0807 | 0.0475 |
| 0        | 0.094  | 0.0085 | 0.0317 | 0.0385 | 0.0114 | 0.0452 | 0      | 0.0204 |
| 0.0227   | 0.0407 | 0.0035 | 0.0426 | 0.023  | 0      | 0      | 0.0501 | 0.0183 |
| 0.0525   | 0.0416 | 0.0362 | 0.0497 | 0.0325 | 0      | 0.0488 | 0.0379 | 0.0253 |
| 0.057    | 0.0091 | 0      | 0      | 0.0068 | 0.0809 | 0.0549 | 0.0046 | 0.0381 |
| 0.0564   | 0.0698 | 0.0278 | 0.0553 | 0.0571 | 0.0723 | 0.0336 | 0.072  | 0.0615 |
| 0.0958   | 0.0785 | 0.0931 | 0.0295 | 0.0478 | 0.079  | 0.0698 | 0.0711 | 0.067  |
| 0.1799   | 0.1373 | 0.0548 | 0.0786 | 0.1532 | 0.065  | 0.0583 | 0.1956 | 0.0685 |
| 0.024    | 0.0656 | 0.0189 | 0.0502 | 0.0396 | 0      | 0      | 0.0787 | 0.0204 |
| 6.00E-04 | 0.0188 | 0      | 0      | 0      | 0      | 0      | 0.0366 | 0      |
| 0.5391   | 0.5274 | 0.4663 | 0.4521 | 0.542  | 0.4991 | 0.6357 | 0.5465 | 0.5141 |
| 0.0168   | 0.0067 | 0.0297 | 0.023  | 0.0302 | 0.0013 | 0.0082 | 0.0214 | 0.0238 |
| 0.5559   | 0.5341 | 0.496  | 0.4751 | 0.5722 | 0.5004 | 0.6439 | 0.568  | 0.538  |

| GSM110107 | GSM110107 | GSM110108 |
|-----------|-----------|-----------|-----------|-----------|-----------|-----------|-----------|-----------|
| 0.0025    | 0         | 0         | 0         | 0.0117    | 0.012     | 0         | 0         | 0.0218    |
| 0         | 0         | 0         | 0         | 0         | 0         | 0         | 0         | 0         |
| 0.1494    | 0.2311    | 0.3295    | 0.1686    | 0.1542    | 0.0693    | 0.0064    | 0.1738    | 0.2708    |
| 0.0211    | 0.0122    | 0.0413    | 0         | 0         | 0.0675    | 0         | 0.049     | 0.0136    |
| 0.1741    | 0.1489    | 0.1862    | 0.1289    | 0.162     | 0.0823    | 0.0283    | 0.116     | 0.1578    |
| 0.0134    | 0.0335    | 0.0824    | 0.0552    | 0.0378    | 0.0531    | 0.0141    | 0         | 0.0584    |
| 0.0352    | 0.089     | 0.0651    | 0.0266    | 0.0548    | 0.0538    | 0.0159    | 0.0167    | 0.0064    |
| 0.2544    | 0.2137    | 0.2751    | 0.1614    | 0.2278    | 0.1433    | 0.1014    | 0.1631    | 0.2044    |
| 0.0337    | 0.0458    | 0.0532    | 0.0497    | 0.0399    | 0.005     | 0         | 0.0152    | 0.0725    |
| 0.1229    | 0.088     | 0.1512    | 0.1746    | 0.1285    | 0.1133    | 0.0416    | 0.1762    | 0.1339    |
| 0.1119    | 0.0583    | 0.1246    | 0.1069    | 0.0893    | 0.0766    | 0.0295    | 0.1386    | 0.1141    |
| 0.0728    | 0.0284    | 0.0567    | 0.1761    | 0.0704    | 0.0598    | 0         | 0.1943    | 0.0064    |
| 0.0315    | 0.0513    | 0.0197    | 0.0223    | 0.0546    | 0.0656    | 0.0414    | 0.0264    | 0.0748    |
| 0.1042    | 0.1063    | 0.1171    | 0.1038    | 0.0933    | 0.0758    | 0.0476    | 0.1013    | 0.1162    |
| 0.0214    | 0         | 0         | 0         | 0         | 0         | 0.0328    | 0         | 0         |
| 0.007     | 0.0681    | 0         | 0         | 0.0469    | 0         | 0.0484    | 0         | 0         |
| 0.0847    | 0.1607    | 0.1677    | 0.0851    | 0.0731    | 0.0922    | 0.0569    | 0.0688    | 0.1331    |
| 0         | 0.001     | 0.0427    | 7.00E-04  | 0.013     | 0         | 0         | 0.0325    | 0.0122    |
| 0.0074    | 0         | 0         | 0         | 0         | 0.0162    | 0.0106    | 0         | 0.0018    |
| 0.2142    | 0.0688    | 0.0084    | 0.21      | 0.1099    | 0.0978    | 0.2851    | 0.3068    | 0.0729    |
| 0.045     | 0.0387    | 0.0287    | 0.0436    | 0.0144    | 0.0624    | 0.0462    | 0.0539    | 0.0404    |
| 0.081     | 0.0291    | 0.0859    | 0.0965    | 0.1808    | 0.1148    | 0.0579    | 0.0682    | 0.1012    |
| 0.0279    | 0.0089    | 0.0169    | 0.0201    | 0.0167    | 0.0143    | 0.026     | 0         | 0         |
| 0.022     | 0         | 0         | 0         | 0         | 0         | 0.0097    | 0         | 0         |
| 0.0077    | 0         | 0.0066    | 0         | 0.0262    | 0         | 0.011     | 0         | 0.0288    |
| 0.0189    | 0.0128    | 0.0202    | 0.0087    | 0.0116    | 0.0107    | 0.0015    | 3.00E-04  | 0.0082    |
| 0.0053    | 0.0165    | 0.0064    | 0         | 0.0029    | 0.0061    | 0.0035    | 0         | 0.0064    |
| 0.0067    | 0         | 0         | 0.0542    | 0         | 0         | 0         | 0.0534    | 0.016     |
| 0.0077    | 0         | 0.1119    | 0.0826    | 0         | 0.0151    | 0.1428    | 0.0211    | 0         |
| 0.0161    | 0.103     | 0.2042    | 0.1779    | 0.1196    | 0.1703    | 0         | 0.2083    | 0.0801    |
| 0.0263    | 0.0439    | 0.0096    | 0.0478    | 0.0451    | 0.0681    | 0.0803    | 0.0201    | 0.0408    |
| 0.0236    | 0.0185    | 0.02      | 0.0263    | 0.0242    | 0.0204    | 0.0198    | 0.0073    | 0.0162    |
| 0.0095    | 0.0454    | 0.0082    | 0         | 0.025     | 0.0333    | 0.0328    | 0         | 0.0129    |
| 0.016     | 0.0012    | 0.019     | 0.0073    | 0.0068    | 0         | 0.0101    | 0.0158    | 0.0185    |
| 0.1258    | 0.1903    | 0.2031    | 0.1704    | 0.076     | 0.3102    | 0.2604    | 0.2334    | 0.1449    |
| 0.0194    | 0.0321    | 0.0225    | 0.0175    | 0.0259    | 0.0281    | 0.01      | 0.025     | 0.0245    |
| 0.0293    | 0.0974    | 0.1336    | 0.0469    | 0.0571    | 0.004     | 0         | 0.0519    | 0.1132    |
| 0         | 0.0074    | 0         | 0         | 0         | 0         | 0         | 0         | 0         |
| 0         | 0         | 0         | 0         | 0         | 0         | 0         | 0         | 0         |
| 0.0211    | 0.004     | 0         | 0         | 0.0091    | 0         | 0.0069    | 0         | 0.0082    |
| 0.1386    | 0.1206    | 0.0901    | 0.156     | 0.1491    | 0.0389    | 0.057     | 0.1788    | 0.0701    |
| 0         | 0.1541    | 0         | 0.2033    | 0.012     | 0.2598    | 0.316     | 0.1668    | 0.1218    |
| 0.0012    | 0.0047    | 0         | 0.0016    | 0.0012    | 0         | 0         | 0         | 0.0051    |
| 0.0161    | 0.0419    | 0         | 0.0118    | 0.0365    | 0.0561    | 0.1063    | 0.002     | 0.0624    |
| 0.1963    | 0.1701    | 0.2382    | 0.2811    | 0.2053    | 0.2679    | 0.1064    | 0.2446    | 0.2323    |
| 0.0179    | 0.0277    | 0.04      | 0.0627    | 0.0418    | 0.0568    | 0.0273    | 0.0434    | 0.0087    |
| 0.0684    | 0.0482    | 0.0711    | 0.0851    | 0.0377    | 0.1136    | 0.0079    | 0.0496    | 0.0332    |
| 0.0815    | 0.1307    | 0.1265    | 0.1017    | 0.068     | 0.1951    | 0.1678    | 0.0947    | 0.0778    |
| 0.1004    | 0.081     | 0.0877    | 0.0667    | 0.0759    | 0.057     | 0.0542    | 0.0584    | 0.0924    |



|        |        |        |        |        |          |          |          |        |
|--------|--------|--------|--------|--------|----------|----------|----------|--------|
| 0.0037 | 0.003  | 0.0059 | 0.004  | 0.0046 | 0.0042   | 0.004    | 8.00E-04 | 0.0022 |
| 0.0019 | 0.0035 | 0      | 0      | 0      | 0        | 0        | 0        | 0      |
| 0.1775 | 0.1129 | 0.1223 | 0.1322 | 0.1375 | 0.09     | 0.0858   | 0.0883   | 0.126  |
| 0.0479 | 0      | 0.0203 | 0.0229 | 0.0076 | 0        | 2.00E-04 | 0.047    | 0      |
| 0.1674 | 0.1307 | 0.1808 | 0.2942 | 0.1097 | 0.2448   | 0.0532   | 0.279    | 0.1518 |
| 0.0547 | 0.0307 | 0.0632 | 0.0272 | 0.0473 | 0.0251   | 0.0517   | 0.0655   | 0.044  |
| 0.0446 | 0.027  | 0.0443 | 0.0298 | 0.037  | 1.00E-04 | 0.0262   | 0.0688   | 0.0493 |
| 0.0232 | 0.0296 | 0.0643 | 0.0418 | 0.0261 | 0.0234   | 0        | 0.0065   | 0.0344 |
| 0      | 0.0276 | 0.0786 | 0.0354 | 0.0231 | 0.0138   | 0.0284   | 0.0089   | 0.0204 |
| 0      | 0      | 0.0379 | 0.0066 | 0.0108 | 0.0029   | 0        | 0.0854   | 0.0094 |
| 0.0168 | 0.0412 | 0.054  | 0.05   | 0.0645 | 0.0613   | 0.0786   | 0.0532   | 0.0494 |
| 0.0351 | 0.0565 | 0.0382 | 0.0858 | 0.0381 | 0.0759   | 0.0556   | 0.0793   | 0.0403 |
| 0.132  | 0.1556 | 0.2204 | 0.1353 | 0.1412 | 0.0045   | 0.0278   | 0.133    | 0.2144 |
| 0      | 0.067  | 0.0714 | 0.0091 | 0.0748 | 0.0172   | 0.0047   | 0        | 0.0706 |
| 0      | 0.0182 | 0.0899 | 0.0236 | 0      | 0        | 0        | 0.0073   | 0.0233 |
| 0.5717 | 0.4969 | 0.5578 | 0.6038 | 0.5367 | 0.3505   | 0.4101   | 0.6813   | 0.5596 |
| 0.0189 | 0.0044 | 0.0084 | 0.01   | 0.0142 | 0.0212   | 0.0183   | 0        | 0.0118 |
| 0.5906 | 0.5014 | 0.5662 | 0.6138 | 0.5509 | 0.3718   | 0.4284   | 0.6813   | 0.5714 |

| GSM110108 | GSM110108 | GSM110108 | GSM110109 | GSM110109 | GSM110109 | GSM110109 | GSM110109 | GSM110109 |
|-----------|-----------|-----------|-----------|-----------|-----------|-----------|-----------|-----------|
| 0.0365    | 0.0062    | 0.0263    | 0         | 0         | 0.0131    | 0.0096    | 0.0135    | 0         |
| 0         | 0         | 0         | 0         | 0         | 0         | 0         | 0         | 0         |
| 0         | 0.1353    | 0.1573    | 0.1702    | 1.00E-04  | 0.2171    | 0         | 0.1133    | 0         |
| 0.0147    | 0.0269    | 0         | 0         | 0         | 0         | 0         | 0         | 0.0362    |
| 0.0105    | 0.1001    | 0.124     | 0.1481    | 0.1369    | 0.2055    | 0.1092    | 0.1857    | 0.0143    |
| 0         | 0.0533    | 0.0607    | 0         | 0.0408    | 0.0773    | 0.0716    | 0.0621    | 0         |
| 0         | 0.0814    | 0.0731    | 0.015     | 0.0379    | 0.0883    | 0         | 0.0303    | 0         |
| 0.0104    | 0.1314    | 0.1621    | 0.1829    | 0.1848    | 0.286     | 0.1708    | 0.2189    | 0.0199    |
| 0         | 0         | 0.0318    | 0.0881    | 0.0873    | 0.0292    | 0.0043    | 0.1086    | 0.0033    |
| 0.0574    | 0.0458    | 0.1023    | 0.1758    | 0.0887    | 0.1395    | 0.1493    | 0.1819    | 0.082     |
| 0.0603    | 0.0229    | 0.0541    | 0.1263    | 0.0683    | 0.0714    | 0.1041    | 0.1211    | 0.0571    |
| 0.0761    | 0.0828    | 0.065     | 0.1352    | 0         | 0.0506    | 0.0879    | 0.0036    | 0.0165    |
| 0.0571    | 0.0365    | 0.0323    | 0.0426    | 0.0444    | 0.0807    | 0.0768    | 0.0713    | 0.0787    |
| 0         | 0.0911    | 0.076     | 0.1134    | 0.0915    | 0.079     | 0.0715    | 0.1171    | 0.0063    |
| 0.0812    | 0.0067    | 0         | 0         | 0.0221    | 0         | 0.0903    | 0.0523    | 0.0424    |
| 0.0352    | 0         | 0         | 0         | 0.0327    | 0.0465    | 0.0037    | 0         | 0.0348    |
| 0.0447    | 0.1372    | 0.0893    | 0.0903    | 0.0218    | 0.1417    | 0         | 0.0765    | 0.0153    |
| 0         | 0         | 0         | 0.0205    | 0         | 0.0054    | 0         | 0         | 0         |
| 0.0029    | 0         | 0         | 0.0186    | 0         | 0.03      | 0         | 0         | 0         |
| 0.2613    | 0.2565    | 0.2649    | 0.0646    | 0.2108    | 0.0478    | 0.2443    | 0.162     | 0.2313    |
| 0.0532    | 0.0477    | 0.0535    | 0.0274    | 0.0446    | 0.0319    | 0.0399    | 0.0337    | 0.0598    |
| 0.2327    | 0.0858    | 0.1353    | 0.0081    | 0.0821    | 0.0659    | 0.0477    | 0.0316    | 0.14      |
| 0.0017    | 0         | 0         | 0.0242    | 0         | 0.0363    | 0         | 0         | 0         |
| 0         | 0.003     | 0         | 0         | 0.006     | 0         | 0.0273    | 0.0177    | 0         |
| 0         | 0         | 0         | 0         | 0         | 0.0523    | 0         | 0.0163    | 0         |
| 0.0095    | 0.0142    | 0.0092    | 0.0159    | 0         | 0.0261    | 0.0067    | 0.0075    | 0.0036    |
| 0.0098    | 0         | 0         | 6.00E-04  | 0.0085    | 0.0034    | 0.0074    | 0         | 0.0069    |
| 0         | 0.0386    | 0.0173    | 0.0611    | 0         | 0         | 0         | 0         | 0         |
| 0.16      | 0.0308    | 0.0182    | 0.0401    | 0.0367    | 0         | 0.1111    | 0.0783    | 0.1459    |
| 0.1943    | 0.2301    | 0.1927    | 0.1521    | 0.04      | 0.0299    | 0.1169    | 0.0774    | 0.1788    |
| 0.1001    | 0.0876    | 0.0553    | 0.0709    | 0.0653    | 0.0134    | 0.0464    | 0.0541    | 0.0728    |
| 0.0159    | 0.0373    | 0.0215    | 0.0391    | 0.0302    | 0.0127    | 0.0162    | 0.029     | 0.0206    |
| 0.0088    | 0.0467    | 0.012     | 0.0167    | 0.035     | 0.018     | 0.014     | 0         | 0.041     |
| 0.0176    | 0.0149    | 6.00E-04  | 0         | 0.0075    | 0         | 0.0159    | 0.0032    | 0.0115    |
| 0.2277    | 0.1203    | 0.1038    | 0.1511    | 0.2302    | 0.0803    | 0.2345    | 0.2526    | 0.2091    |
| 0.0167    | 0.0125    | 0.0243    | 0.0184    | 0.0285    | 0.0278    | 0.0195    | 0.0317    | 0.0303    |
| 0         | 0.0376    | 0.0545    | 0.0616    | 0         | 0.095     | 0         | 0.0206    | 0         |
| 0         | 0.0047    | 0         | 0         | 0         | 0.007     | 0         | 0         | 0.0148    |
| 0.0101    | 0         | 0         | 0         | 0         | 0         | 0         | 0         | 0         |
| 0         | 0         | 0         | 0         | 0.007     | 0.0059    | 0.0018    | 0.0017    | 0         |
| 0.0781    | 0.0827    | 0.0313    | 0.1063    | 0.081     | 0.0598    | 0.0976    | 0         | 0.0057    |
| 0.1935    | 0.2908    | 0.2923    | 0.1154    | 0.2002    | 0.1417    | 0.2577    | 0.2031    | 0.4133    |
| 0.0032    | 0         | 0         | 0.0047    | 0.0039    | 0.0058    | 0         | 0.0019    | 0         |
| 0.0838    | 0.0569    | 0.0804    | 0.0234    | 0.0477    | 0.0969    | 0.0926    | 0.0384    | 0.1189    |
| 0.157     | 0.2861    | 0.2774    | 0.3125    | 0.2236    | 0.134     | 0.2057    | 0.2255    | 0.1842    |
| 0.0631    | 0.045     | 0.0601    | 0.0457    | 0.0315    | 0.029     | 0.0499    | 0.03      | 0.0562    |
| 0.0862    | 0.0575    | 0.0285    | 0.0777    | 0.0243    | 0.0409    | 0         | 0.0366    | 0.049     |
| 0.1144    | 0.0963    | 0.0383    | 0.1008    | 0.1404    | 0.0152    | 0.1129    | 0.1409    | 0.1046    |
| 0         | 0.0508    | 0.0444    | 0.0943    | 0.0655    | 0.0921    | 0.0668    | 0.095     | 0.0018    |

|        |          |          |        |        |        |        |        |        |
|--------|----------|----------|--------|--------|--------|--------|--------|--------|
| 0.0019 | 4.00E-04 | 1.00E-04 | 0.001  | 0.0027 | 0.001  | 0.0038 | 0.0029 | 0.0033 |
| 0.0126 | 0.0103   | 0        | 0      | 0.0011 | 0      | 0.0035 | 0      | 0.0088 |
| 0.0049 | 0.0629   | 0.0417   | 0.1141 | 0.1889 | 0.0912 | 0.0846 | 0.1548 | 0      |
| 0      | 0        | 0        | 0.0483 | 0.0079 | 0      | 0      | 0.0127 | 0      |
| 0.2034 | 0.2016   | 0.2098   | 0.2646 | 0.1169 | 0.1143 | 0.2281 | 0.1567 | 0.1428 |
| 0.0194 | 0.0189   | 0.0104   | 0.0447 | 0.0311 | 0.058  | 0.0183 | 0.0316 | 0.0239 |
| 0      | 0.0498   | 0.0289   | 0.0163 | 0.0415 | 0.0648 | 0.0517 | 0.021  | 0      |
| 0      | 0        | 0        | 0.0496 | 0.0202 | 0.0406 | 0.0262 | 0.0177 | 0      |
| 0      | 0        | 0.0111   | 0.0321 | 0.0143 | 0.0361 | 0      | 0.0037 | 0      |
| 0      | 0.023    | 0        | 0      | 0      | 0      | 0.0023 | 0      | 0      |
| 0.0563 | 0.051    | 0.0414   | 0.0599 | 0.0308 | 0.0637 | 0.0513 | 0.069  | 0.0695 |
| 0.067  | 0.0974   | 0.0774   | 0.0616 | 0.0415 | 0.0389 | 0.0709 | 0.057  | 0.0747 |
| 0      | 0.0914   | 0.1377   | 0.1275 | 0      | 0.1542 | 0      | 0.0757 | 0      |
| 0      | 0.0291   | 0.0055   | 0.0453 | 0.0234 | 0.0463 | 0      | 0.0173 | 0      |
| 0      | 0        | 0        | 0.0273 | 0      | 0.0058 | 0      | 0      | 0      |
| 0.4126 | 0.5199   | 0.5441   | 0.5199 | 0.4253 | 0.5236 | 0.5035 | 0.4924 | 0.3577 |
| 0.0206 | 0.0031   | 0.0132   | 0.0214 | 0      | 0.0397 | 0.0048 | 0.0068 | 0      |
| 0.4332 | 0.523    | 0.5572   | 0.5413 | 0.4253 | 0.5633 | 0.5083 | 0.4992 | 0.3577 |

| GSM110109 | GSM110109 | GSM110109 | GSM110109 | GSM110110 | GSM110110 | GSM110110 | GSM110110 | GSM110110 |
|-----------|-----------|-----------|-----------|-----------|-----------|-----------|-----------|-----------|
| 0         | 0         | 2.00E-04  | 0         | 0         | 0         | 0.0151    | 0.0185    | 0.0127    |
| 0         | 0         | 0         | 0         | 0         | 0         | 0         | 0         | 0         |
| 0.2713    | 0.2649    | 0.0363    | 0         | 0.1029    | 0.134     | 0         | 0.2696    | 0.1425    |
| 0         | 0         | 0         | 0.0428    | 0.0074    | 0         | 0.0626    | 0         | 0         |
| 0.1435    | 0.1886    | 0.0927    | 0.0682    | 0.0941    | 0.0797    | 0.0264    | 0.138     | 0.1301    |
| 0.0157    | 0.0938    | 0.0337    | 0         | 0.0807    | 0         | 0         | 0.0883    | 0.068     |
| 0.0698    | 0.045     | 0         | 0         | 0.0494    | 0         | 0         | 0.0937    | 0.0255    |
| 0.2263    | 0.2614    | 0.1419    | 0.0774    | 0.144     | 0.0924    | 0.0777    | 0.2172    | 0.2167    |
| 0.0331    | 0.0597    | 0.0124    | 0         | 0.019     | 0.027     | 0         | 0         | 0         |
| 0.1359    | 0.2142    | 0.0672    | 0.1219    | 0.1123    | 0.1811    | 0.11      | 0.0565    | 0.1175    |
| 0.1014    | 0.1415    | 0.029     | 0.0854    | 0.039     | 0.1056    | 0.1177    | 0.0429    | 0.081     |
| 0.0918    | 0.1302    | 0.0046    | 0.1618    | 0.0379    | 0.1971    | 0.1798    | 0.0051    | 0.0392    |
| 0.0573    | 0.067     | 0.0949    | 0.017     | 0.0661    | 0         | 8.00E-04  | 0.0832    | 0.0874    |
| 0.1431    | 0.1355    | 0.0712    | 0.0598    | 0.0825    | 0.071     | 0.1117    | 0.1067    | 0.1066    |
| 0         | 0         | 0         | 0.1871    | 0.0294    | 0         | 0.075     | 0.0178    | 0.0274    |
| 0         | 0         | 0.049     | 0.0443    | 0         | 0         | 0         | 0         | 0.0158    |
| 0.1314    | 0.126     | 0.078     | 0.0117    | 0.0641    | 0.1193    | 0         | 0.0869    | 0.0744    |
| 0         | 0.0096    | 0         | 0         | 0         | 0         | 0         | 0.0061    | 0         |
| 0         | 0.0028    | 0.002     | 0         | 0         | 0.0024    | 0.0278    | 0         | 0         |
| 0.1715    | 0         | 0.3317    | 0.2992    | 0.2541    | 0.1989    | 0.141     | 0.1602    | 0.2315    |
| 0.0362    | 0         | 0.0511    | 0.0471    | 0.0606    | 0.0555    | 0.0337    | 0.037     | 0.0358    |
| 0.0029    | 0.0965    | 0.0533    | 0         | 0.1281    | 0         | 0.1723    | 0.0384    | 0.1555    |
| 0.035     | 0         | 0.0077    | 0         | 0.0403    | 0.0433    | 0.0363    | 0         | 0.0187    |
| 0.0083    | 0         | 0         | 0.0552    | 0         | 0         | 0.0091    | 0         | 0.0109    |
| 0         | 0.0126    | 0.0136    | 0         | 0         | 0         | 0         | 0         | 0.0205    |
| 0.0163    | 0.0198    | 0.012     | 0.0015    | 0.004     | 0.0092    | 0.0238    | 0.0159    | 0.0066    |
| 0         | 0         | 5.00E-04  | 0         | 0.0025    | 0.0046    | 0         | 0         | 0         |
| 0.0511    | 0.0445    | 0         | 0         | 0         | 0.0788    | 0         | 0.0301    | 0         |
| 0         | 0         | 0.0618    | 0.2488    | 0.0624    | 0         | 0.043     | 0.0629    | 0.0111    |
| 0         | 0.1071    | 0.0096    | 0.1424    | 0.1351    | 0.2669    | 0.1509    | 0.0714    | 0         |
| 0.0543    | 0.0251    | 0.0256    | 0.1102    | 0.0517    | 0.0592    | 0.1429    | 0.0655    | 0.0171    |
| 0.0413    | 0.03      | 0.0153    | 0.0213    | 0.0167    | 0.0236    | 0.0528    | 0.0356    | 0.0047    |
| 0.0245    | 0         | 0.0049    | 0.0218    | 0.0272    | 0.0416    | 0.0416    | 0.0165    | 4.00E-04  |
| 0.0113    | 0         | 0.0126    | 0.0105    | 0.0173    | 0.0049    | 0.003     | 0.0162    | 0.0168    |
| 0.1382    | 0.1556    | 0.2446    | 0.0865    | 0.2503    | 0.1246    | 0.0927    | 0.174     | 0.2393    |
| 0.0196    | 0.0247    | 0.0298    | 0.01      | 0.0301    | 0.0326    | 0.0298    | 0.0149    | 0.0235    |
| 0.097     | 0.1193    | 0         | 0         | 0.0178    | 0.0507    | 0         | 0.1182    | 0.0226    |
| 0         | 0         | 0         | 0         | 0         | 0.0053    | 0         | 0         | 0         |
| 0         | 0         | 0         | 0         | 0         | 0         | 0.0835    | 0         | 0         |
| 0.0118    | 0.0039    | 0.0076    | 0         | 0         | 0         | 0.0091    | 0.0011    | 0.0163    |
| 0.1465    | 0.1589    | 0.0666    | 0.1548    | 0.0587    | 0.1465    | 0.1981    | 0.0382    | 0.1144    |
| 0.1221    | 0         | 0.3152    | 0.2585    | 0.2821    | 0.2458    | 0.1637    | 0.1483    | 0.1551    |
| 0         | 0.0136    | 0         | 0         | 0         | 0         | 0         | 2.00E-04  | 0         |
| 0.0012    | 0.0065    | 0.0675    | 0.0853    | 0.0412    | 0.046     | 0.0613    | 0.063     | 0.0354    |
| 0.2307    | 0.2831    | 0.1512    | 0.2101    | 0.1635    | 0.2762    | 0.26      | 0.2166    | 0.1426    |
| 0.0375    | 0.0185    | 0.0278    | 0.0436    | 0.0704    | 0.0748    | 0.0515    | 0.023     | 0.021     |
| 0.0622    | 0.1079    | 0.0771    | 0         | 0.0464    | 0.046     | 0.0182    | 0.0562    | 0.0659    |
| 0.0595    | 0.0911    | 0.1312    | 0.0449    | 0.1444    | 0.0659    | 0.0152    | 0.1223    | 0.1423    |
| 0.104     | 0.0929    | 0.06      | 0.0372    | 0.0489    | 0.0288    | 0.0442    | 0.0528    | 0.1093    |

|        |          |        |        |        |        |        |        |        |
|--------|----------|--------|--------|--------|--------|--------|--------|--------|
| 0      | 0        | 0.0032 | 0.0011 | 0.0051 | 0.0038 | 0.002  | 0.0027 | 0.0027 |
| 0      | 0        | 0.0056 | 0.0027 | 0      | 0      | 0.0047 | 0      | 0      |
| 0.1712 | 0.2089   | 0.1139 | 0      | 0.1056 | 0.0055 | 0.0781 | 0.1432 | 0.1695 |
| 0.0151 | 0.027    | 0      | 0.0341 | 0      | 0.012  | 0      | 0      | 0      |
| 0.1745 | 0.2569   | 0.1639 | 0.1784 | 0.2181 | 0.3001 | 0.2575 | 0.1506 | 0.1494 |
| 0.045  | 0.0472   | 0.0565 | 0.0553 | 0      | 0      | 0      | 0.0257 | 0.0742 |
| 0.0254 | 0.0212   | 0.0683 | 0      | 0.0235 | 0.0271 | 0      | 0.0299 | 0.0587 |
| 0.0103 | 0.048    | 0      | 0      | 0      | 0.0046 | 0.0032 | 0.0172 | 0.0154 |
| 0.0215 | 0.0659   | 0      | 0      | 0.0338 | 0.0325 | 0.0253 | 0.0446 | 0.0153 |
| 0.0245 | 4.00E-04 | 0.0467 | 0      | 0.0018 | 0.0014 | 0      | 0.0138 | 0      |
| 0.0297 | 0.0362   | 0.0454 | 0.0317 | 0.0505 | 0.0547 | 0.0297 | 0.0443 | 0.0487 |
| 0.0274 | 0.0389   | 0.0571 | 0.0502 | 0.0625 | 0.077  | 0.0853 | 0.0468 | 0.0405 |
| 0.1971 | 0.1759   | 0      | 0      | 0.0821 | 0.1024 | 0      | 0.2116 | 0.1212 |
| 0.0206 | 0.0732   | 0      | 0      | 0.0082 | 0.0386 | 0.0216 | 0.0443 | 0      |
| 0      | 0.0136   | 0      | 0.0039 | 0      | 0      | 0      | 0.016  | 0      |
| 0.6237 | 0.5785   | 0.4668 | 0.5667 | 0.4882 | 0.5669 | 0.5108 | 0.5422 | 0.5369 |
| 0.0175 | 0.0014   | 0.005  | 0      | 0.0202 | 0.0228 | 0.0396 | 0.0092 | 0.0157 |
| 0.6412 | 0.5799   | 0.4718 | 0.5667 | 0.5084 | 0.5897 | 0.5504 | 0.5514 | 0.5526 |

| GSM11011CGSM110110GSM11011CGSM110110GSM11011CGSM110111GSM110111GSM110111GSM110111 |        |        |          |        |        |        |          |        |
|-----------------------------------------------------------------------------------|--------|--------|----------|--------|--------|--------|----------|--------|
| 0                                                                                 | 0      | 0.0132 | 0.0279   | 0      | 0.0046 | 0      | 0.0059   | 0      |
| 0                                                                                 | 0      | 0      | 0        | 0      | 0      | 0      | 0        | 0      |
| 0.1916                                                                            | 0.2729 | 0.1434 | 6.00E-04 | 0.1815 | 0.0962 | 0.3313 | 0        | 0.1457 |
| 0.0611                                                                            | 0      | 0      | 0.0626   | 0      | 0.0414 | 0      | 0.0135   | 0      |
| 0.0101                                                                            | 0.1932 | 0.1447 | 0.0851   | 0.1354 | 0.1087 | 0.1934 | 0.0206   | 0.1918 |
| 0.0031                                                                            | 0.1174 | 0.0784 | 0        | 0.0857 | 0.06   | 0      | 0.006    | 0.1064 |
| 0                                                                                 | 0.0462 | 0.0846 | 0        | 0.076  | 0.0228 | 0.0825 | 0        | 0.028  |
| 0                                                                                 | 0.2395 | 0.2391 | 0.1647   | 0.1889 | 0.1696 | 0.2422 | 0.0756   | 0.2393 |
| 0.0037                                                                            | 0.1076 | 0.0041 | 0        | 0.0571 | 0.0048 | 0.0372 | 0        | 0.0957 |
| 0.0445                                                                            | 0.1838 | 0.0971 | 0.0859   | 0.1298 | 0.145  | 0.1244 | 0.0365   | 0.1898 |
| 0.0153                                                                            | 0.1139 | 0.0241 | 0.0981   | 0.0793 | 0.1019 | 0.1224 | 7.00E-04 | 0.1137 |
| 0.0536                                                                            | 0.0196 | 0.072  | 0.0754   | 0.0533 | 0.0847 | 0.0636 | 0        | 0.0857 |
| 0.0322                                                                            | 0.0576 | 0.0677 | 0.0566   | 0.0968 | 0.0828 | 0.0128 | 0.0717   | 0.062  |
| 0.053                                                                             | 0.0873 | 0.0789 | 0.0747   | 0.0943 | 0.1124 | 0.1507 | 0.0687   | 0.1257 |
| 0.0325                                                                            | 0      | 0      | 0.1792   | 0      | 0.0497 | 0.0126 | 0.2173   | 0      |
| 0                                                                                 | 0      | 0      | 0.0499   | 0      | 0.0229 | 0      | 0.0223   | 0      |
| 0.1205                                                                            | 0.1148 | 0.127  | 0.0199   | 0.0969 | 0.0434 | 0.1035 | 0        | 0.0613 |
| 0                                                                                 | 0      | 0.0016 | 0        | 0      | 0      | 0.0648 | 0        | 0.0219 |
| 0                                                                                 | 0      | 0.0015 | 0        | 0.0092 | 0      | 0      | 0        | 0.007  |
| 0.2734                                                                            | 0.0104 | 0.0481 | 0.1935   | 0.107  | 0.2609 | 0.1837 | 0.3387   | 0.101  |
| 0.0655                                                                            | 0.0362 | 0.0567 | 0.0344   | 0.0409 | 0.0289 | 0.0061 | 0.0507   | 0.014  |
| 0.15                                                                              | 0.123  | 0.0574 | 0.1342   | 0.0634 | 0.0933 | 0      | 0.0372   | 0.0682 |
| 0                                                                                 | 0      | 0.027  | 0        | 0      | 0.0052 | 0.0491 | 0        | 0.0123 |
| 0                                                                                 | 0      | 0      | 0.0577   | 0      | 0      | 0.0108 | 0.0731   | 0      |
| 0                                                                                 | 0.0225 | 0.0078 | 0        | 0      | 0      | 0      | 0        | 0.031  |
| 0                                                                                 | 0.0173 | 0.0205 | 0.0025   | 0.0072 | 0.0067 | 0.014  | 0        | 0.013  |
| 0.0116                                                                            | 0.0094 | 0.0311 | 0.004    | 0.0038 | 0      | 0      | 0        | 0      |
| 0                                                                                 | 0      | 0      | 0        | 0.0269 | 0      | 0.0862 | 0        | 0.0679 |
| 0.1438                                                                            | 0.0029 | 0      | 0.2739   | 0.0412 | 0.0173 | 0.0309 | 0.2742   | 0      |
| 0.3612                                                                            | 0.1641 | 0.1396 | 0        | 0.1675 | 0.0537 | 0.1161 | 0.097    | 0.0293 |
| 0.0582                                                                            | 0.0089 | 0.0457 | 0.0748   | 0.0607 | 0.0616 | 0.0534 | 0.09     | 0.0349 |
| 0.0177                                                                            | 0.0046 | 0.0201 | 0.0353   | 0.034  | 0.0224 | 0.0439 | 0.02     | 0.0152 |
| 0.0859                                                                            | 0      | 0.0378 | 0.0061   | 0.0133 | 0.0248 | 0.0032 | 0.0468   | 0      |
| 0.0236                                                                            | 0      | 0      | 0.016    | 0.0013 | 0.014  | 0.0045 | 0.0245   | 0.007  |
| 0.2284                                                                            | 0.1222 | 0.2698 | 0.208    | 0.3196 | 0.1773 | 0.051  | 0.2015   | 0.1225 |
| 0.0274                                                                            | 0.0276 | 0.028  | 0.0049   | 0.0241 | 0.0266 | 0.0205 | 0.0181   | 0.0196 |
| 0.0673                                                                            | 0.1381 | 0.0579 | 0        | 0.0636 | 0.0113 | 0.1332 | 0        | 0.0634 |
| 0.0017                                                                            | 0      | 0.0046 | 0        | 0      | 0      | 0      | 0        | 0      |
| 0                                                                                 | 0      | 0      | 0        | 0      | 0      | 0      | 0        | 0      |
| 0                                                                                 | 0.007  | 0.008  | 0.0124   | 0      | 0.001  | 0      | 0.0082   | 0.0026 |
| 0.0302                                                                            | 0.0313 | 0.0566 | 0.1195   | 0.0964 | 0.1267 | 0.1146 | 0.05     | 0.096  |
| 0.2971                                                                            | 0.1234 | 0.2292 | 0.0875   | 0.1981 | 0.1311 | 0      | 0.2355   | 0.1427 |
| 0                                                                                 | 0.0054 | 0.0118 | 0.0014   | 0.0019 | 0      | 0.0106 | 0.001    | 0.0077 |
| 0.0405                                                                            | 0.0344 | 0.0666 | 0.0824   | 0.0198 | 0.0438 | 0      | 0.0919   | 0.0201 |
| 0.1747                                                                            | 0.1963 | 0.1995 | 0.0446   | 0.2714 | 0.2152 | 0.3127 | 0.1077   | 0.2429 |
| 0.0637                                                                            | 0.0393 | 0.0456 | 0        | 0.0465 | 0.0308 | 0.0403 | 0.0044   | 0.0342 |
| 0.0707                                                                            | 0.0321 | 0.0655 | 0.0699   | 0.0763 | 0      | 0.0748 | 0.0069   | 0.0556 |
| 0.1625                                                                            | 0.0984 | 0.1422 | 0.1473   | 0.1846 | 0.1234 | 0.0196 | 0.1328   | 0.0857 |
| 0                                                                                 | 0.0689 | 0.058  | 0.059    | 0.0702 | 0.0706 | 0.099  | 0.0332   | 0.1022 |

|        |          |        |        |        |          |        |        |        |
|--------|----------|--------|--------|--------|----------|--------|--------|--------|
| 0.0032 | 0.0033   | 0.003  | 0.003  | 0.0049 | 0        | 0      | 0      | 0.0028 |
| 0.0056 | 4.00E-04 | 0.0027 | 0.0018 | 0      | 0.0063   | 0      | 0.0057 | 0      |
| 0      | 0.1275   | 0.1023 | 0.0755 | 0.1607 | 0.1474   | 0.1574 | 0.0463 | 0.208  |
| 0      | 0        | 0      | 0.0317 | 0.0142 | 0.0095   | 0.0165 | 0.0013 | 0.0315 |
| 0.1933 | 0.1817   | 0.0996 | 0.0853 | 0.2246 | 0.1829   | 0.2034 | 0.0891 | 0.198  |
| 0.0232 | 0.0068   | 0.0692 | 0.1464 | 0.0203 | 0.0451   | 0.0745 | 0.0735 | 0.0302 |
| 0.0348 | 0.0075   | 0.0806 | 0.0202 | 0.0029 | 0.0199   | 0.0489 | 0.0155 | 0.0496 |
| 0.0129 | 0.0027   | 0.0411 | 0.0081 | 0.038  | 1.00E-04 | 0.0377 | 0      | 0.0332 |
| 0      | 0.043    | 0.0278 | 0      | 0.0444 | 0        | 0.076  | 0      | 0.1012 |
| 0.0298 | 0.0269   | 0      | 0      | 0      | 0        | 0.0579 | 0      | 0.0029 |
| 0.0885 | 0.042    | 0.0535 | 0      | 0.0454 | 0.0508   | 0.0267 | 0.027  | 0.0368 |
| 0.1241 | 0.0606   | 0.043  | 0      | 0.0724 | 0.0503   | 0.0514 | 0.025  | 0.0509 |
| 0.1255 | 0.2032   | 0.0809 | 0      | 0.1348 | 0.0987   | 0.2479 | 0      | 0.1358 |
| 0.0175 | 0.0687   | 0.0413 | 0.0163 | 0.0279 | 0.0055   | 0.0591 | 0      | 0.0428 |
| 0.049  | 0.0331   | 0      | 0.0197 | 0.0017 | 0        | 0.0359 | 0      | 0      |
| 0.4481 | 0.4899   | 0.4025 | 0.4385 | 0.4879 | 0.5713   | 0.7134 | 0.4348 | 0.5388 |
| 0      | 0        | 0.0208 | 0.014  | 0.0046 | 0.0049   | 0.0246 | 0.003  | 0.0096 |
| 0.4481 | 0.4899   | 0.4234 | 0.4525 | 0.4925 | 0.5762   | 0.738  | 0.4378 | 0.5485 |

| GSM110111 | GSM110111 | GSM110111 | GSM110111 | GSM110111 | GSM110111 | GSM110112 | GSM110112 | GSM110112 |
|-----------|-----------|-----------|-----------|-----------|-----------|-----------|-----------|-----------|
| 0.0042    | 0         | 2.00E-04  | 0         | 0         | 0.0088    | 0         | 0.0061    | 0.0296    |
| 0         | 0         | 0         | 0         | 0         | 0         | 0         | 0         | 0         |
| 0.0042    | 0.1765    | 0         | 0.0925    | 0.1058    | 0.1447    | 0.0436    | 0.1298    | 0.2017    |
| 0         | 0.0014    | 0         | 0         | 0         | 0.0084    | 0.0621    | 0         | 0.0873    |
| 0.0948    | 0.1345    | 0.0527    | 0.1259    | 0.0593    | 0.1403    | 0         | 0.1597    | 0.1613    |
| 0.0517    | 0.0715    | 0.016     | 0.0928    | 0.0615    | 0.0732    | 0.0165    | 0         | 0.053     |
| 0.0429    | 0.0737    | 0         | 0.0606    | 0         | 0.0464    | 0.0173    | 0.0138    | 0.0155    |
| 0.1155    | 0.183     | 0.0777    | 0.1901    | 0.0679    | 0.2009    | 0         | 0.2542    | 0.1873    |
| 0.0231    | 0.0442    | 0.03      | 0.0306    | 0.0205    | 0.0262    | 0.0116    | 0.0231    | 0.041     |
| 0.086     | 0.1488    | 0.0026    | 0.1408    | 0.0596    | 0.0899    | 0.0408    | 0.137     | 0.0693    |
| 0.0466    | 0.0939    | 0         | 0.1038    | 0.0442    | 0.0367    | 4.00E-04  | 0.1091    | 0.0449    |
| 0         | 0.0565    | 0         | 0.1505    | 0.0622    | 0         | 0         | 0.1013    | 0         |
| 0.0608    | 0.0757    | 0         | 0.0427    | 0.0507    | 0.1207    | 0.0718    | 0.041     | 0.0902    |
| 0.0538    | 0.0677    | 0.0449    | 0.0796    | 0.0264    | 0.0904    | 0.0485    | 0.1322    | 0.0719    |
| 0.0018    | 0         | 0.2727    | 0         | 0.0311    | 0         | 0.0443    | 0         | 0.1331    |
| 0         | 0         | 0.0382    | 0         | 0         | 0.0122    | 0.1052    | 0         | 0.0371    |
| 0.0194    | 0.0583    | 0         | 0.1319    | 0.1104    | 0.0846    | 0.102     | 0.0817    | 0.132     |
| 0         | 0.0017    | 0         | 0         | 0.0143    | 0         | 0         | 0         | 0         |
| 0.024     | 0.0179    | 0         | 0         | 0         | 0         | 0.0264    | 0.0073    | 0         |
| 0.294     | 0.1222    | 0.3107    | 0.0916    | 0.4965    | 0.222     | 0.3251    | 0.1314    | 0.1982    |
| 0.0556    | 0.0341    | 0.0492    | 0.048     | 0.0517    | 0.0491    | 0.0586    | 0.0362    | 0.0524    |
| 0.1251    | 0.0877    | 0.0434    | 0.1625    | 0.1519    | 0.1237    | 0.1689    | 0.0628    | 0.0914    |
| 0.0091    | 0         | 0         | 0.0655    | 0         | 0         | 0.0017    | 0.0706    | 0         |
| 0         | 0         | 0.0263    | 0         | 0.0232    | 0         | 0         | 0.0374    | 0.0491    |
| 0         | 0.0046    | 0         | 0.005     | 0.0126    | 0.0167    | 0.0266    | 0         | 0.0523    |
| 0.0103    | 0.0091    | 0         | 0.004     | 0         | 0.0093    | 0         | 0.0086    | 0.0057    |
| 0.0033    | 0.0051    | 0         | 0.0056    | 0         | 0.0098    | 3.00E-04  | 0.0019    | 0.0163    |
| 0         | 0         | 0         | 0.0181    | 0.0045    | 0         | 0         | 0.0623    | 0         |
| 0.0062    | 0.0102    | 0.2694    | 0         | 0.1475    | 0.0246    | 0.0339    | 0         | 0.1403    |
| 0.1676    | 0.2774    | 0.0866    | 0.2       | 0.199     | 0.0577    | 0.0679    | 0         | 0.0342    |
| 0.0822    | 0.0375    | 0.1274    | 0.076     | 0         | 0.0344    | 0.0606    | 0.0591    | 0.0437    |
| 0.0342    | 0.0088    | 0.0284    | 0.0535    | 0         | 0.0156    | 0.0216    | 0.0321    | 0.0127    |
| 0.0557    | 0.0324    | 0.0229    | 0.0168    | 0         | 0.0163    | 0.0152    | 0.0063    | 0         |
| 0         | 0.0024    | 0.0152    | 0.0103    | 0.0212    | 0.0085    | 0         | 0         | 0.0252    |
| 0.1554    | 0.1747    | 0.1426    | 0.26      | 0.1128    | 0.1538    | 0.1427    | 0.2083    | 0.2733    |
| 0.0243    | 0.0196    | 0.0126    | 0.0219    | 0.0409    | 0.0245    | 0.03      | 0.0214    | 0.0244    |
| 0         | 0.0692    | 0         | 0.0148    | 0.0325    | 0.0372    | 0         | 0.0098    | 0.0512    |
| 0         | 0         | 0         | 0.0048    | 0.0019    | 6.00E-04  | 0         | 0         | 0         |
| 0         | 0         | 0.0059    | 0         | 0         | 0         | 0         | 0         | 0         |
| 0         | 0         | 0         | 0         | 0         | 0         | 0         | 0.0076    | 0         |
| 0         | 0.0665    | 0.0345    | 0.1038    | 0.0685    | 0.038     | 0         | 0.1769    | 0.049     |
| 0.2952    | 0.1796    | 0.2958    | 0.2442    | 0.3701    | 0.2534    | 0.3899    | 0.0415    | 0.0703    |
| 0         | 0.0022    | 0.0027    | 0         | 0         | 0         | 0         | 0.0034    | 0.0072    |
| 0.067     | 0.0636    | 0.1267    | 0.0241    | 0.0575    | 0.0687    | 0.0915    | 0         | 0.0557    |
| 0.2955    | 0.2405    | 0.1746    | 0.2759    | 0.1312    | 0.1823    | 0.1372    | 0.2297    | 0.0675    |
| 0.06      | 0.0381    | 0.0418    | 0.0561    | 0.0401    | 0.0142    | 0.0302    | 0.0347    | 0.0138    |
| 0         | 0.0585    | 0         | 0.1289    | 0.0158    | 0.0316    | 0.0605    | 0.144     | 0.0714    |
| 0.0698    | 0.1124    | 0.075     | 0.1487    | 0.0637    | 0.0975    | 0.0864    | 0.1272    | 0.1433    |
| 0.0392    | 0.0363    | 0.0216    | 0.0496    | 0         | 0.0764    | 0         | 0.1224    | 0.0957    |



|          |        |          |        |          |        |        |        |        |
|----------|--------|----------|--------|----------|--------|--------|--------|--------|
| 0.003    | 0.0021 | 0.0028   | 0.0023 | 6.00E-04 | 0.0031 | 0.0023 | 0.0043 | 0.0037 |
| 6.00E-04 | 0      | 0.0064   | 0      | 0        | 0.003  | 0.0138 | 0      | 0      |
| 0.0492   | 0.0659 | 0.0249   | 0.0857 | 0        | 0.1077 | 0.0196 | 0.2322 | 0.1036 |
| 0        | 0.0037 | 0.024    | 0.0114 | 0        | 0.0026 | 0      | 0.0612 | 0.0025 |
| 0.1907   | 0.1931 | 0.1514   | 0.287  | 0.1183   | 0.1212 | 0.0649 | 0.2366 | 0.0585 |
| 0        | 0.0215 | 0.0864   | 0.0288 | 0.0165   | 0.0576 | 0.0398 | 0.1131 | 0.0963 |
| 0.0268   | 0.0074 | 0        | 0.0139 | 0.0675   | 0.0732 | 0.0374 | 0.0546 | 0.0554 |
| 0        | 0.0193 | 0        | 0.0526 | 0        | 0.0037 | 0      | 0.0192 | 0      |
| 0        | 0.0497 | 0        | 0.0085 | 0        | 0      | 0      | 0      | 0      |
| 0.0067   | 0.0099 | 0        | 0      | 0.1244   | 0      | 0      | 0      | 0      |
| 0.0935   | 0.0592 | 0.0148   | 0.0422 | 0.0765   | 0.0492 | 0.0595 | 0.0359 | 0.0113 |
| 0.1144   | 0.0713 | 0.0246   | 0.0784 | 0.0453   | 0.0489 | 0.1012 | 0.0567 | 0.0045 |
| 0.002    | 0.151  | 0        | 0.0132 | 0.0955   | 0.1349 | 0.0167 | 0.0426 | 0.1499 |
| 0        | 0.0548 | 0        | 0.05   | 0        | 0.0122 | 0      | 0.0195 | 0      |
| 0        | 0.0225 | 0        | 0      | 0        | 0      | 0      | 0      | 0.0081 |
| 0.4188   | 0.5025 | 0.4505   | 0.4433 | 0.5885   | 0.4977 | 0.3744 | 0.5293 | 0.5361 |
| 0.0186   | 0.009  | 1.00E-04 | 0.0328 | 0        | 0.0044 | 0.014  | 0.042  | 0.0148 |
| 0.4374   | 0.5114 | 0.4506   | 0.4761 | 0.5885   | 0.5021 | 0.3884 | 0.5713 | 0.5509 |

| GSM110112 | GSM110113 | GSM110113 |
|-----------|-----------|-----------|-----------|-----------|-----------|-----------|-----------|-----------|
| 0.0072    | 0.0134    | 0         | 0.0024    | 0.0051    | 0         | 0.0089    | 0.0189    | 0         |
| 0         | 0         | 0         | 0         | 0         | 0         | 0         | 0         | 0         |
| 0.1204    | 0.139     | 0.1765    | 0.1424    | 0.1895    | 0.1837    | 0.1587    | 0.2127    | 0.1275    |
| 0         | 0         | 0         | 0.0187    | 0         | 0.0446    | 0.0538    | 0         | 0.0658    |
| 0         | 0.088     | 0.0612    | 0.1132    | 0.095     | 0.1219    | 0.0866    | 0.1048    | 0.0673    |
| 0         | 0.0677    | 0.019     | 0.0478    | 0.0744    | 0.0195    | 0         | 0.0366    | 0.0248    |
| 0         | 0.0521    | 0.0252    | 0         | 0.0872    | 0.06      | 0.0447    | 0.0734    | 0.0259    |
| 0.0378    | 0.155     | 0.0719    | 0.0987    | 0.1713    | 0.1669    | 0.1214    | 0.1582    | 0.1074    |
| 0         | 0.0087    | 0.0444    | 0.087     | 0.0016    | 0.0642    | 0.0016    | 0.0381    | 0.0198    |
| 0         | 0.0627    | 0.1087    | 0.1527    | 0         | 0.1472    | 0.0826    | 0.0872    | 0.0944    |
| 0.0255    | 0.036     | 0.0466    | 0.0972    | 0.0088    | 0.0828    | 0.0681    | 0.0694    | 0.0356    |
| 0.0146    | 0         | 0.0465    | 0.0502    | 0         | 0.1344    | 0.0228    | 0.0341    | 0.0579    |
| 0.0193    | 0.0643    | 0.0553    | 0.0834    | 0.0224    | 0.0528    | 0.0422    | 0.0461    | 0.0488    |
| 0.0752    | 0.0555    | 0.05      | 0.0572    | 0.1045    | 0.0905    | 0.1034    | 0.0697    | 0.0642    |
| 0.041     | 0         | 0.0078    | 0.0985    | 0.0159    | 0         | 0.006     | 0         | 0.1888    |
| 0.012     | 0         | 0         | 0         | 0.0148    | 0         | 0.0014    | 0         | 0.0363    |
| 0.0819    | 0.1501    | 0.0405    | 0.1184    | 0.0686    | 0.1163    | 0.0764    | 0.0978    | 0.1148    |
| 0.002     | 0         | 0.0219    | 0         | 2.00E-04  | 0         | 0.0089    | 0         | 0         |
| 0.0097    | 0.0217    | 0         | 0         | 0.0017    | 0.0058    | 0         | 0.0072    | 0         |
| 0.5371    | 0.1443    | 0.3289    | 0.3029    | 0.2632    | 0.0115    | 0.1752    | 0.1911    | 0.2348    |
| 0.0477    | 0.0579    | 0.065     | 0.0588    | 0.0389    | 0.0438    | 0.047     | 0.0584    | 0.0472    |
| 0.0287    | 0.0918    | 0.0765    | 0.1406    | 0.1165    | 0.0567    | 0.017     | 0.0308    | 0.0017    |
| 0.0576    | 0.0387    | 0         | 0         | 0         | 0         | 0.022     | 0         | 0         |
| 0.0157    | 0         | 0         | 0.0021    | 0.025     | 0         | 0.012     | 0         | 0.0452    |
| 0.0577    | 0         | 0         | 0         | 0.0211    | 0         | 2.00E-04  | 0         | 0         |
| 0         | 0.0059    | 0         | 0         | 0.0147    | 0.0068    | 0.0085    | 0.0137    | 0         |
| 0         | 0.0052    | 0.0016    | 0.0129    | 0         | 0.003     | 0         | 0.0027    | 0.0021    |
| 0         | 0         | 0.0138    | 0         | 0.0154    | 0.0255    | 0         | 0         | 0         |
| 0.1004    | 0.0128    | 0.0736    | 0.1174    | 0.0061    | 0         | 0.0578    | 0.0486    | 0.2714    |
| 0.0122    | 0.0198    | 0.1931    | 0.2763    | 0.0222    | 0.201     | 0.1275    | 0.086     | 0.1033    |
| 0.0302    | 0.0538    | 0.0379    | 0.0399    | 0.0809    | 0.0665    | 0.0952    | 0.0219    | 0.072     |
| 0.0213    | 0.0259    | 0.0077    | 0.0077    | 0.0192    | 0.0256    | 0.0491    | 0.011     | 0.0301    |
| 0.0108    | 0.0262    | 0.0112    | 0.026     | 0.0348    | 0.0411    | 0.0526    | 0.0025    | 0         |
| 0.0049    | 0         | 0.0023    | 0.016     | 0         | 0.0021    | 0.0053    | 0         | 0.0156    |
| 0.2212    | 0.2395    | 0.1921    | 0.1519    | 0.1733    | 0.0475    | 0.1806    | 0.2387    | 0.1026    |
| 0.0329    | 0.0259    | 0.0234    | 0.0257    | 0.0222    | 0.025     | 0.0217    | 0.0344    | 0.0341    |
| 0.007     | 0.0296    | 0.0832    | 0.0406    | 0.0626    | 0.0647    | 0.0364    | 0.0693    | 0.0303    |
| 0.0022    | 0.0067    | 0         | 0.0085    | 0         | 0         | 0         | 0         | 0.0184    |
| 0         | 0         | 0         | 0         | 0         | 0         | 0         | 0         | 0         |
| 0.0051    | 0.0012    | 0         | 0         | 0         | 0         | 0         | 0.007     | 0         |
| 0.0927    | 0.0259    | 0.0194    | 0         | 0.0605    | 0.1773    | 0.1298    | 0.0215    | 0.0825    |
| 0.2811    | 0.399     | 0.3177    | 0.3724    | 0.2132    | 0.2468    | 0.1727    | 0.3003    | 0.3366    |
| 0         | 0         | 0         | 6.00E-04  | 0         | 0.0058    | 0.0038    | 0         | 0         |
| 0.0606    | 0.0793    | 0.0648    | 0.0382    | 0.0675    | 0.0563    | 0.0343    | 0.0665    | 0.0956    |
| 0.1599    | 0.2066    | 0.2155    | 0.1872    | 0.248     | 0.2864    | 0.2172    | 0.1898    | 0.1488    |
| 0.0477    | 0.067     | 0.0416    | 0.0583    | 0.0286    | 0.0428    | 0.0448    | 0.0406    | 0.0246    |
| 0.0293    | 0.0851    | 0.0184    | 0.0494    | 0.0218    | 0.0716    | 0.0814    | 0.0898    | 0         |
| 0.1084    | 0.1341    | 0.0948    | 0.0783    | 0.0976    | 0.0095    | 0.1114    | 0.1472    | 0.0797    |
| 0.0589    | 0.0523    | 0.027     | 0.0288    | 0.0617    | 0.0637    | 0.0657    | 0.0661    | 0.018     |

|          |        |        |        |          |        |        |        |        |
|----------|--------|--------|--------|----------|--------|--------|--------|--------|
| 9.00E-04 | 0.0037 | 0.0042 | 0.004  | 7.00E-04 | 0      | 0.0012 | 0.0043 | 0.0019 |
| 0        | 0      | 0      | 0.0033 | 0        | 0      | 0.0023 | 0      | 0.0067 |
| 0.0448   | 0.1229 | 0.0222 | 0      | 0.1445   | 0.1077 | 0.1454 | 0.076  | 0      |
| 0        | 0      | 0      | 0      | 0        | 0.0273 | 0      | 0      | 0      |
| 0.1498   | 0.1867 | 0.1777 | 0.2157 | 0.1737   | 0.2169 | 0.1873 | 0.1572 | 0.0903 |
| 0.0332   | 0.031  | 0      | 0      | 0.031    | 0.018  | 0.0264 | 0.0549 | 0.0258 |
| 0.0104   | 0.0592 | 0.041  | 0.0109 | 0.0106   | 0      | 0.0476 | 0.0207 | 0.045  |
| 0        | 0.0219 | 0      | 0.0104 | 0        | 0      | 0.058  | 0.0121 | 0      |
| 0        | 0.0093 | 0.0413 | 0      | 0.0368   | 0.0283 | 0.0157 | 0      | 0      |
| 0.0707   | 0      | 0.0566 | 0      | 0.035    | 0      | 0      | 0      | 0      |
| 0.0243   | 0.0876 | 0.0833 | 0.0794 | 0.0768   | 0.0277 | 0      | 0.0667 | 0.0386 |
| 0.0582   | 0.0802 | 0.0907 | 0.0918 | 0.0786   | 0.0874 | 0.0284 | 0.0813 | 0.04   |
| 0.0969   | 0.077  | 0.1702 | 0.0953 | 0.1608   | 0.1331 | 0.0986 | 0.1513 | 0.0765 |
| 0        | 0.0145 | 0      | 0      | 0.0107   | 0.0505 | 0.0026 | 0.0157 | 0.0233 |
| 0        | 0      | 0      | 0.0057 | 0        | 0      | 0      | 0.0022 | 0.0167 |
| 0.5653   | 0.3953 | 0.5477 | 0.5369 | 0.5045   | 0.511  | 0.5177 | 0.4705 | 0.5265 |
| 0.0372   | 0.0369 | 0      | 0.0012 | 0.0034   | 0.0029 | 0.0154 | 0.013  | 0      |
| 0.6025   | 0.4322 | 0.5477 | 0.5381 | 0.5079   | 0.5139 | 0.5332 | 0.4835 | 0.5265 |

| GSM110113 | GSM110114 |
|-----------|-----------|-----------|-----------|-----------|-----------|-----------|-----------|-----------|
| 0         | 0         | 0.0014    | 0.0122    | 0         | 0         | 0         | 0.0041    | 0.0034    |
| 0         | 0         | 0         | 0         | 0         | 0         | 0         | 0         | 0         |
| 0.1551    | 0.14      | 0.1858    | 0.1414    | 0.1599    | 0.1385    | 0.2478    | 0.2618    | 0.053     |
| 0.0836    | 0.0177    | 0.0233    | 0         | 0.0167    | 0.0312    | 0         | 0.0112    | 0.0346    |
| 0.1326    | 0.1835    | 0.0901    | 0.0976    | 0.134     | 0.1763    | 0.0981    | 0.1436    | 0.0026    |
| 0.0817    | 0.0866    | 0.0525    | 0.0776    | 0.0632    | 0.1049    | 0         | 0.0666    | 0         |
| 0.0703    | 0.0628    | 0         | 0.0675    | 0.0522    | 0.0602    | 0         | 0.0727    | 0         |
| 0.203     | 0.2726    | 0.0901    | 0.1414    | 0.1969    | 0.2129    | 0.178     | 0.2092    | 0.053     |
| 0.0114    | 0.0474    | 0.0342    | 0         | 0.0062    | 0.0708    | 0         | 0.0129    | 0         |
| 0.1434    | 0.1853    | 0.1257    | 0.0571    | 0.1002    | 0.1015    | 0.0934    | 0.1087    | 0.0116    |
| 0.0783    | 0.1201    | 0.0598    | 0.0076    | 0.0757    | 0.1151    | 0.0915    | 0.0965    | 0.0032    |
| 0.062     | 0.1671    | 0.0567    | 0.0128    | 0.0697    | 0.036     | 0.0175    | 0.1542    | 0         |
| 0.0978    | 0.0403    | 0.0845    | 0.0733    | 0.0343    | 0.0488    | 0.0586    | 0         | 0.0358    |
| 0.0788    | 0.1146    | 0.0848    | 0.0875    | 0.0893    | 0.0761    | 0.1338    | 0.078     | 0.0618    |
| 0.0086    | 0         | 0.0188    | 0.0062    | 0         | 0         | 0.0143    | 0         | 0.1116    |
| 0         | 0         | 0         | 0.0193    | 7.00E-04  | 0         | 0         | 0         | 0.0713    |
| 0.1024    | 0.0967    | 0.0806    | 0.0434    | 0.0677    | 0.1091    | 0.109     | 0.1951    | 0.0655    |
| 0         | 0         | 0         | 0         | 0         | 0         | 0         | 0         | 0         |
| 0         | 0.0084    | 0.0106    | 0.0124    | 0         | 0         | 0         | 0.003     | 0         |
| 0.1882    | 0.0959    | 0.2757    | 0.107     | 0.2256    | 0.2064    | 0.2101    | 0.189     | 0.3027    |
| 0.0627    | 0.019     | 0.0446    | 0.0457    | 0.0476    | 0.0551    | 0.0133    | 0.042     | 0.0529    |
| 0.0782    | 0.0474    | 0.0875    | 0.1371    | 0.0104    | 0.1574    | 0         | 0.0995    | 0         |
| 0         | 0.0044    | 0         | 0.0082    | 0         | 0.016     | 0.0459    | 0.0011    | 0         |
| 0         | 0         | 0         | 0         | 0         | 0         | 0.0098    | 0         | 0.0537    |
| 0         | 0         | 0         | 0.0706    | 0         | 0         | 0.0083    | 0         | 0         |
| 0.0046    | 0.0186    | 0.0107    | 0.012     | 0.0021    | 0.0081    | 0.0183    | 0.0064    | 0.0044    |
| 0.0085    | 0.0044    | 0         | 0.0106    | 0         | 0.0012    | 0         | 0.0024    | 0.0029    |
| 0         | 0         | 0         | 0         | 0.0036    | 0         | 0         | 0.0463    | 0         |
| 0.0557    | 0         | 0.0428    | 0         | 0.0486    | 0         | 0         | 0.1391    | 0.1885    |
| 0.2218    | 0.1734    | 0.2054    | 0.0526    | 0.1309    | 0.1439    | 0         | 0.2002    | 0.0351    |
| 0.0397    | 0.0606    | 0.0711    | 0.012     | 0.0564    | 0.0357    | 0.0678    | 0.0281    | 0.0938    |
| 0.0155    | 0.0472    | 0.0274    | 0.0068    | 0.0173    | 0.0193    | 0.0339    | 0.0088    | 0.0213    |
| 0         | 0         | 0.0137    | 0.0151    | 0.0088    | 0         | 0.0393    | 0         | 0.0311    |
| 0.0071    | 0.008     | 0.0088    | 0.0061    | 0.0081    | 0.0139    | 0         | 0.0233    | 0         |
| 0.2356    | 0.159     | 0.1942    | 0.282     | 0.1073    | 0.2323    | 0.1206    | 0.1944    | 0.2874    |
| 0.0253    | 0.0228    | 0.0205    | 0.0329    | 0.0218    | 0.0282    | 0.0216    | 0.0334    | 0.0272    |
| 0.0435    | 0.0418    | 0.059     | 0.0466    | 0.0557    | 0.027     | 0.084     | 0.1062    | 0         |
| 0         | 0         | 0         | 0         | 0         | 0         | 0         | 0.0019    | 0         |
| 0         | 0         | 0         | 0         | 0         | 0         | 0         | 0         | 0         |
| 0         | 0.0118    | 0         | 0.0046    | 0         | 0         | 0.0027    | 0         | 0         |
| 0.0953    | 0.1947    | 0.03      | 0.0407    | 0.0545    | 0.0111    | 0.081     | 0.1404    | 0         |
| 0.205     | 0.0058    | 0.2133    | 0.3064    | 0.2505    | 0.1609    | 0.1701    | 0.1474    | 0.2557    |
| 0.0021    | 0.0014    | 0         | 6.00E-04  | 0.0026    | 0         | 9.00E-04  | 0         | 0         |
| 0.0416    | 0.0149    | 0.0723    | 0.0501    | 0.1001    | 0.0367    | 0.0334    | 0.028     | 0.1124    |
| 0.2125    | 0.1497    | 0.2703    | 0.2119    | 0.2526    | 0.2365    | 0.2318    | 0.2841    | 0.179     |
| 0.0493    | 0.0325    | 0.0592    | 0.0488    | 0.0453    | 0.045     | 0.0252    | 0.0534    | 0.051     |
| 0.0765    | 0.0724    | 0.0177    | 0.0195    | 0.0173    | 0.1038    | 0.0813    | 0.1104    | 0.064     |
| 0.1206    | 0.1046    | 0.0898    | 0.1858    | 0.0481    | 0.117     | 0.0839    | 0.1058    | 0.1692    |
| 0.0608    | 0.0953    | 0.0224    | 0.0581    | 0.0487    | 0.0841    | 0.0939    | 0.0945    | 0.0268    |

|          |        |          |        |        |        |        |        |        |
|----------|--------|----------|--------|--------|--------|--------|--------|--------|
| 0.0021   | 0.0031 | 4.00E-04 | 0.0046 | 0      | 0.0023 | 0      | 0.0041 | 0.004  |
| 0        | 0.0023 | 0.0013   | 0.0037 | 0      | 0      | 0      | 0.0064 | 0.0059 |
| 0.1111   | 0.1645 | 0.0271   | 0.1566 | 0.0481 | 0.1146 | 0.2016 | 0.0664 | 0.0541 |
| 3.00E-04 | 0.0378 | 0        | 0      | 0      | 0.0117 | 0      | 0      | 0      |
| 0.1744   | 0.1847 | 0.259    | 0.1509 | 0.2308 | 0.2247 | 0.1629 | 0.3474 | 0.0179 |
| 0.0328   | 0.0373 | 0        | 0      | 0.0407 | 0.0982 | 0.0881 | 0.0252 | 0.0849 |
| 0.0345   | 0.0376 | 0        | 0.0083 | 0.0737 | 0.0125 | 0.0741 | 0.0313 | 0.0183 |
| 0        | 0.0247 | 0.0017   | 0.0112 | 0.0052 | 0.0199 | 0.0254 | 0.0321 | 0      |
| 0.0131   | 0.0073 | 0        | 0.0322 | 0      | 0      | 0.024  | 0.0138 | 0      |
| 0.0131   | 0      | 0        | 0.0178 | 0      | 0      | 0.0029 | 0      | 0      |
| 0.0705   | 0.0701 | 0.0557   | 0.0398 | 0.0441 | 0.0463 | 0.0616 | 0.0547 | 0.0521 |
| 0.0769   | 0.0671 | 0.0848   | 0.04   | 0.0614 | 0.0906 | 0.0312 | 0.0903 | 0.0277 |
| 0.1012   | 0.1062 | 0.1591   | 0.1234 | 0.1515 | 0.0968 | 0.1875 | 0.1251 | 0.0086 |
| 0.0323   | 0.0624 | 0        | 0.0294 | 0      | 0      | 0.0421 | 0.0114 | 0      |
| 0        | 0.0025 | 0.0123   | 0      | 0.002  | 0      | 0      | 0.0239 | 0.0129 |
| 0.5353   | 0.5886 | 0.573    | 0.3413 | 0.5592 | 0.4801 | 0.5544 | 0.6153 | 0.3841 |
| 0        | 0.0064 | 0.006    | 0.0164 | 0      | 0.008  | 0.023  | 0.0041 | 0.0017 |
| 0.5353   | 0.595  | 0.579    | 0.3577 | 0.5592 | 0.4881 | 0.5774 | 0.6194 | 0.3858 |

| GSM110114 |
|-----------|-----------|-----------|-----------|-----------|-----------|-----------|-----------|-----------|
| 0         | 0         | 0         | 0.0084    | 0.0183    | 0         | 0         | 0         | 0.0059    |
| 0         | 0         | 0         | 0         | 0         | 0         | 0         | 0         | 0         |
| 0.1025    | 0.1067    | 0         | 0.0395    | 0.0239    | 0         | 0.1113    | 0.2121    | 0.1258    |
| 0         | 0         | 0         | 0.0413    | 0         | 0.1017    | 0         | 0         | 0         |
| 0.1376    | 0.076     | 0         | 0         | 0.1446    | 0         | 0.07      | 0.1028    | 0.1619    |
| 0.0859    | 0.0392    | 0         | 0.0247    | 0.0924    | 0         | 0.0513    | 0         | 0.0588    |
| 0.0685    | 0.0237    | 0         | 0.0055    | 0.0637    | 0         | 0.0032    | 0.0385    | 0.0321    |
| 0.1901    | 0.129     | 0         | 0.0249    | 0.2239    | 0.0097    | 0.124     | 0.1735    | 0.2016    |
| 0.0368    | 0.0374    | 0         | 0         | 0         | 0         | 0.0018    | 0         | 0.0381    |
| 0.0936    | 0.1051    | 0         | 0         | 0.1041    | 0         | 0.0784    | 0.0901    | 0.0812    |
| 0.0629    | 0.0589    | 0         | 0         | 0.1095    | 0         | 0.0599    | 0.0789    | 0.0598    |
| 0.0498    | 0.023     | 0         | 0         | 0.0577    | 0         | 0         | 0.079     | 0         |
| 0.0367    | 0.0542    | 0.0221    | 0         | 0.0428    | 0.033     | 0.0792    | 0.0255    | 0.0386    |
| 0.0544    | 0.0754    | 0.0222    | 0.0205    | 0.0939    | 0.0434    | 0.065     | 0.1087    | 0.0788    |
| 0.0011    | 0         | 0.1438    | 0.0189    | 0.0592    | 0.2601    | 0.0099    | 0         | 0         |
| 0         | 0         | 0         | 0.0558    | 0         | 0.0913    | 0.0135    | 0         | 0.0416    |
| 0.0689    | 0.0455    | 0.0332    | 0.1014    | 0.0288    | 0         | 0.0599    | 0.0899    | 0.0627    |
| 0.0039    | 0.0012    | 0         | 0         | 5.00E-04  | 0         | 0         | 0.0164    | 0         |
| 0.0119    | 9.00E-04  | 0         | 0.0061    | 0         | 0         | 0.0077    | 0.0086    | 0         |
| 0.3742    | 0.1585    | 0.3209    | 0.2826    | 0.3013    | 0.3005    | 0.3073    | 0.0741    | 0.176     |
| 0.0458    | 0.0371    | 0.0391    | 0.0881    | 0.0414    | 0.0316    | 0.0419    | 0.0423    | 0.0388    |
| 0.1161    | 0.1686    | 0         | 0.1062    | 0.151     | 0         | 0.0879    | 0.0829    | 0.0417    |
| 0         | 0         | 0         | 0         | 0.0148    | 0         | 0         | 0.037     | 0         |
| 0         | 0         | 0.0538    | 0         | 0         | 0.0658    | 0         | 0.0015    | 0         |
| 0         | 0.012     | 0         | 0.0245    | 0.013     | 0         | 0.0089    | 0.0484    | 0.0269    |
| 0         | 0.0151    | 0         | 9.00E-04  | 0.0122    | 0         | 0.0029    | 0.0104    | 0.0264    |
| 0.0044    | 0         | 0.0077    | 0.0302    | 0         | 0         | 0         | 0.0053    | 0.0041    |
| 0         | 0         | 0         | 0         | 0         | 0         | 0         | 0.0237    | 0         |
| 0.0242    | 0         | 0.2307    | 0.0456    | 0.0581    | 0.4098    | 0.072     | 0.0101    | 0         |
| 0.256     | 0.1053    | 0.2933    | 0         | 0.1821    | 0         | 0.0979    | 0.0473    | 0         |
| 0.0139    | 0.0939    | 0.128     | 0.0645    | 0.0972    | 0.1342    | 0.0194    | 0.093     | 0.0495    |
| 0.0033    | 0.0446    | 0.0409    | 0         | 0.048     | 0.034     | 0.0043    | 0.0466    | 0.0203    |
| 0         | 0.0237    | 0.0864    | 0.0408    | 0.0232    | 0.0138    | 0         | 0.051     | 0.0156    |
| 0         | 0         | 0         | 0         | 0.0067    | 4.00E-04  | 0.0082    | 0.0144    | 0         |
| 0.0799    | 0.0673    | 0.2576    | 0.3594    | 0.2345    | 0.2636    | 0.1006    | 0.2027    | 0.1572    |
| 0.0325    | 0.0194    | 0.0308    | 0.0074    | 0.0183    | 0.0131    | 0.0313    | 0.0174    | 0.0222    |
| 0.0145    | 0.0436    | 0         | 0         | 0         | 0         | 0.0319    | 0.0828    | 0.0303    |
| 0         | 0         | 0.0192    | 0         | 0         | 0         | 0         | 0.0042    | 0         |
| 0         | 0         | 0.0183    | 0         | 0         | 0         | 0         | 0.0022    | 0         |
| 0.0045    | 0.0055    | 0         | 0         | 0         | 0.0012    | 0         | 0.0055    | 0.0106    |
| 0.0369    | 0.07      | 0         | 0         | 0.0529    | 0         | 0.0867    | 0.1315    | 0.0623    |
| 0.2443    | 0.2779    | 0.3222    | 0.3581    | 0.1871    | 0.1571    | 0.3195    | 0.1501    | 0.1258    |
| 0         | 0         | 2.00E-04  | 0         | 0         | 0         | 0         | 0.0049    | 0.0057    |
| 0.0523    | 0.0773    | 0.1199    | 0.1177    | 0.0541    | 0.1206    | 0.1068    | 0.0203    | 0.107     |
| 0.2025    | 0.1631    | 0.2239    | 0         | 0.2236    | 0.1435    | 0.1637    | 0.1796    | 0.1294    |
| 0.0473    | 0.0475    | 0.0646    | 0.0131    | 0.0602    | 0.0127    | 0.0393    | 0.0426    | 0.0319    |
| 0.056     | 0.0039    | 0.0485    | 0.0635    | 0.0632    | 0.0045    | 0.0215    | 0.0809    | 0.0621    |
| 0.0851    | 0.057     | 0.0676    | 0.128     | 0.1046    | 0.1264    | 0.0448    | 0.1282    | 0.0654    |
| 0.0255    | 0.0389    | 0.0041    | 0         | 0.0513    | 0.0259    | 0.032     | 0.0836    | 0.0766    |

|        |          |        |          |        |          |          |        |        |
|--------|----------|--------|----------|--------|----------|----------|--------|--------|
| 0.0036 | 0.0033   | 0.0021 | 3.00E-04 | 0.002  | 7.00E-04 | 0.0038   | 0.0034 | 0.0015 |
| 0.0067 | 0        | 0.0088 | 0.0116   | 0      | 8.00E-04 | 4.00E-04 | 0.0038 | 0      |
| 0.0195 | 0.1326   | 0      | 0.1224   | 0.0789 | 0        | 0.0856   | 0.1721 | 0.1579 |
| 0      | 0        | 0      | 0        | 0      | 0        | 0        | 0.0259 | 0      |
| 0.235  | 0.1648   | 0.1267 | 0        | 0.3014 | 0.1636   | 0.0797   | 0.1435 | 0.0643 |
| 0      | 0.0033   | 0      | 0.0802   | 0.0738 | 0.0645   | 0.0471   | 0.0566 | 0.068  |
| 0.0401 | 0.0095   | 0      | 0        | 0.0143 | 0        | 0.0408   | 0.0097 | 0.0865 |
| 0      | 0.021    | 0.005  | 0        | 0.03   | 0        | 0.0226   | 0.0428 | 0.0022 |
| 0      | 0.0305   | 0      | 0        | 0.0096 | 0        | 0        | 0.0613 | 0      |
| 0.0609 | 0.0088   | 0      | 0        | 0.0201 | 0        | 0        | 0      | 0      |
| 0.0709 | 0.0368   | 0.0787 | 0.0542   | 0.0319 | 0.0218   | 0.042    | 0.0277 | 0.0225 |
| 0.1045 | 0.0727   | 0.0788 | 0.0761   | 0.0597 | 0.0329   | 0.0359   | 0.0393 | 0.0033 |
| 0.0882 | 0.1075   | 0      | 0        | 0      | 0.0086   | 0.0946   | 0.1694 | 0.107  |
| 0      | 0.0634   | 0.0395 | 0.0106   | 0      | 0        | 9.00E-04 | 0.0822 | 0.0307 |
| 0      | 0        | 0      | 0        | 0      | 0.0476   | 0        | 0      | 0      |
| 0.5433 | 0.4591   | 0.3914 | 0.3362   | 0.5235 | 0.3705   | 0.5254   | 0.5046 | 0.5091 |
| 0.006  | 4.00E-04 | 0      | 0.0072   | 0.0166 | 0        | 0.0038   | 0.0228 | 0.003  |
| 0.5492 | 0.4596   | 0.3914 | 0.3434   | 0.5401 | 0.3705   | 0.5292   | 0.5274 | 0.5121 |

| GSM110115 | GSM110115 | GSM110115 | GSM110115 | GSM110115 | GSM110084 | GSM110084 | GSM110084 | GSM110084 |
|-----------|-----------|-----------|-----------|-----------|-----------|-----------|-----------|-----------|
| 0         | 0.0188    | 0         | 0         | 0         | 0.0041    | 0.0068    | 0         | 0.0215    |
| 0         | 0         | 0         | 0         | 0         | 0         | 0         | 0         | 0         |
| 0.0692    | 0.3007    | 0         | 0.1293    | 0.187     | 0.121     | 0.1736    | 0.1455    | 0.1874    |
| 0.0902    | 0         | 0.0697    | 0.0104    | 0         | 0         | 0         | 0         | 0.0137    |
| 0         | 0.1741    | 0         | 0.0727    | 0.0685    | 0.1048    | 0.1781    | 0.1474    | 0.1653    |
| 6.00E-04  | 0.0938    | 0         | 0.0485    | 0.0464    | 0.0699    | 0.0795    | 0.0878    | 0.0667    |
| 0         | 0.0056    | 0         | 0.0307    | 0.0418    | 0.0369    | 0.0648    | 0.0476    | 0.0928    |
| 0.0046    | 0.2021    | 0         | 0.1088    | 0.1155    | 0.1291    | 0.2187    | 0.1909    | 0.2278    |
| 0         | 0.0934    | 0         | 0.0437    | 0.0261    | 0.0733    | 0.07      | 0.076     | 0.0559    |
| 0         | 0.1621    | 0         | 0.1564    | 0.0637    | 0.1382    | 0.1514    | 0.1503    | 0.1646    |
| 0         | 0.0936    | 0         | 0.0986    | 0.0273    | 0.0572    | 0.0703    | 0.0765    | 0.0911    |
| 0         | 1.00E-04  | 0         | 0.0313    | 0         | 0.0553    | 0.0978    | 0.0574    | 0.1247    |
| 0.0573    | 0.086     | 0         | 0.058     | 0.0526    | 0.0713    | 0.0395    | 0.0662    | 0.0388    |
| 0.0595    | 0.0839    | 0.0128    | 0.0766    | 0.055     | 0.0646    | 0.0844    | 0.091     | 0.1033    |
| 0.0909    | 0         | 0.024     | 0.0166    | 0.0015    | 0         | 0         | 0.0026    | 0         |
| 0         | 0         | 0.0613    | 0         | 0         | 0         | 0         | 0         | 0         |
| 0.0927    | 0.1099    | 0.0014    | 0.0695    | 0.0977    | 0.0876    | 0.1443    | 0.0887    | 0.0915    |
| 0         | 0         | 0         | 0         | 0         | 0         | 0         | 0         | 0.0029    |
| 0.015     | 0         | 0.0103    | 0.0183    | 0         | 0.0268    | 0.0127    | 0.0067    | 0.0173    |
| 0.3411    | 0.1977    | 0.2984    | 0.2229    | 0.1506    | 0.2907    | 0.2556    | 0.3025    | 0.1668    |
| 0.0635    | 0.0305    | 0.0401    | 0.0397    | 0.0554    | 0.0422    | 0.0428    | 0.0328    | 0.0276    |
| 0.1342    | 0.0633    | 0.0488    | 0.0906    | 0.1866    | 0.073     | 0.0567    | 0.0885    | 0.0368    |
| 0         | 0         | 0         | 0.0129    | 0.035     | 0         | 0         | 0         | 0         |
| 0         | 0         | 0         | 0         | 0         | 0         | 0         | 0         | 0         |
| 0         | 0.0287    | 0.0323    | 0.0039    | 0.0402    | 0         | 0         | 0         | 0         |
| 1.00E-04  | 0.016     | 0.0019    | 0.0147    | 0.0058    | 0.0076    | 0.0204    | 0.0166    | 0.0123    |
| 0         | 0         | 0.0182    | 0         | 0.0082    | 0         | 0         | 0         | 0         |
| 0         | 0         | 0         | 0         | 0.0245    | 0         | 0         | 0.0234    | 0.0081    |
| 0         | 0         | 0.1603    | 0.0525    | 0.0044    | 0.0026    | 0.0085    | 0.0628    | 0.0136    |
| 0.1613    | 0.0851    | 0.1363    | 0.0737    | 0.1629    | 0.1035    | 0.1909    | 0.1381    | 0.1689    |
| 0.0291    | 0.0216    | 0.087     | 0.0374    | 0.0658    | 0.0281    | 0.0567    | 0.0484    | 0.0421    |
| 0.0243    | 0.0033    | 0.0182    | 0.0134    | 0.0531    | 0.0079    | 0.0174    | 0.0122    | 0.0122    |
| 0.0278    | 0         | 0.0647    | 0         | 0.0383    | 0.0084    | 0.0046    | 6.00E-04  | 0.0137    |
| 0.0114    | 0         | 0.0048    | 0         | 0.0199    | 3.00E-04  | 0         | 0.0057    | 0.0036    |
| 0.1454    | 0.1154    | 0.3702    | 0.1407    | 0.1736    | 0.1365    | 0.1126    | 0.1038    | 0.0694    |
| 0.0307    | 0.0302    | 0.029     | 0.0253    | 0.0147    | 0.0108    | 0.0105    | 0.0062    | 0         |
| 0.0038    | 0.1215    | 0         | 0.0343    | 0.0882    | 0.0193    | 0.0537    | 0.0422    | 0.0906    |
| 0         | 0         | 0         | 0         | 0.003     | 0         | 0         | 0         | 0         |
| 0         | 0         | 0         | 0         | 0         | 0         | 0         | 0         | 0         |
| 0         | 0.0051    | 0         | 0         | 0         | 0.0011    | 0.0014    | 0.0013    | 0         |
| 0.0443    | 0.0241    | 0.0333    | 0.076     | 0         | 0.0856    | 0.1225    | 0.0919    | 0.1833    |
| 0.3395    | 0.1822    | 0.3108    | 0.309     | 0.4039    | 0.2528    | 0.107     | 0.1236    | 0.0699    |
| 0         | 0.0093    | 0         | 0.0049    | 0         | 0.0022    | 0.0011    | 0         | 0.002     |
| 0.0891    | 0.0533    | 0.0922    | 0.0898    | 0.0357    | 0.0616    | 0.056     | 0.0314    | 0.0755    |
| 0.2299    | 0.1753    | 0.0959    | 0.1873    | 0.1318    | 0.2804    | 0.2881    | 0.3245    | 0.2823    |
| 0.0271    | 0.0395    | 0.0552    | 0.0453    | 0.0487    | 0.0685    | 0.0629    | 0.0475    | 0.0577    |
| 0.0759    | 0.039     | 0.0027    | 0.0551    | 0.038     | 0.0345    | 0.034     | 0         | 0.0027    |
| 0.0757    | 0.0177    | 0.1787    | 0.0776    | 0.1402    | 0.0938    | 0.0312    | 0.0686    | 0.033     |
| 0.0258    | 0.0829    | 0.0258    | 0.0337    | 0.0623    | 0.0591    | 0.0577    | 0.0546    | 0.0609    |



|        |        |        |          |        |        |          |        |        |
|--------|--------|--------|----------|--------|--------|----------|--------|--------|
| 0      | 0      | 0.0021 | 0.0017   | 0.0043 | 0.003  | 8.00E-04 | 0.0017 | 0.0028 |
| 0      | 0      | 0.013  | 1.00E-04 | 0.0044 | 0.0029 | 0.0034   | 0.0068 | 0      |
| 0.0311 | 0.1104 | 0.051  | 0.0896   | 0.0969 | 0.1043 | 0.0824   | 0.0896 | 0.1146 |
| 0      | 0.0023 | 0      | 0        | 0      | 0      | 0.0069   | 0      | 0.0154 |
| 0.1544 | 0.1199 | 0.0921 | 0.1621   | 0.1624 | 0.1818 | 0.1707   | 0.1797 | 0.1559 |
| 0.0346 | 0.0168 | 0      | 0.0068   | 0      | 0.0123 | 0.039    | 0.0229 | 0.0227 |
| 0.0505 | 0.0427 | 0      | 0.009    | 0.0147 | 0.0017 | 0.0334   | 0.0139 | 0.0541 |
| 0.0341 | 0.0116 | 0      | 0.0155   | 0.0276 | 0      | 8.00E-04 | 0      | 0.0162 |
| 0      | 0.0141 | 0      | 0        | 0.0018 | 0.023  | 0.0353   | 0.0368 | 0.076  |
| 0      | 0.0078 | 0.0103 | 0        | 0.0078 | 0      | 0.0202   | 0.0045 | 0      |
| 0.0966 | 0.0286 | 0.0954 | 0.0479   | 0.0683 | 0.0726 | 0.0654   | 0.0671 | 0.0632 |
| 0.0983 | 0.0339 | 0.0632 | 0.0546   | 0.0867 | 0.0984 | 0.0843   | 0.0664 | 0.0992 |
| 0.0305 | 0.241  | 0      | 0.1      | 0.1428 | 0.1147 | 0.1309   | 0.1345 | 0.169  |
| 0      | 0.0216 | 0.0398 | 0.0335   | 0.0502 | 0      | 1.00E-04 | 0.0035 | 0.0218 |
| 0      | 0.025  | 0      | 0        | 0      | 0      | 0.0179   | 0      | 0.0035 |
| 0.3895 | 0.6224 | 0.3438 | 0.523    | 0.3941 | 0.5535 | 0.6626   | 0.6154 | 0.661  |
| 0.0075 | 0.0094 | 0.0052 | 0.0156   | 0.0175 | 0.0154 | 0.0098   | 0.0034 | 0.0194 |
| 0.397  | 0.6318 | 0.349  | 0.5386   | 0.4116 | 0.569  | 0.6724   | 0.6187 | 0.6804 |

| GSM110084 | GSM110084 | GSM110084 | GSM110085 | GSM110085 | GSM110085 | GSM110085 | GSM110085 | GSM110085 |
|-----------|-----------|-----------|-----------|-----------|-----------|-----------|-----------|-----------|
| 0.0275    | 0.0216    | 0.0165    | 0.0315    | 0.0248    | 0         | 0.0129    | 0.0202    | 0.0188    |
| 0         | 0         | 0         | 0         | 0         | 0         | 0         | 0         | 0         |
| 0.0907    | 0.1325    | 0.0998    | 0.1574    | 0.1549    | 0.0925    | 0.1771    | 0.1646    | 0.1639    |
| 0.0249    | 0.0139    | 0.0249    | 0         | 0         | 0         | 0         | 0.0161    | 0.0162    |
| 0.1191    | 0.0923    | 0.1238    | 0.0576    | 0.1562    | 0.1266    | 0.1196    | 0.1023    | 0.1286    |
| 0.0367    | 0.0363    | 0.0516    | 0         | 0.0601    | 0.028     | 0.001     | 0.0337    | 0.0721    |
| 0.0609    | 0.0109    | 0.0238    | 0.0716    | 0.0136    | 0.025     | 0.0682    | 0.0266    | 1.00E-04  |
| 0.1444    | 0.1432    | 0.2134    | 0.1541    | 0.2262    | 0.1821    | 0.1994    | 0.1346    | 0.1816    |
| 0.0835    | 0.0203    | 0.0492    | 0         | 0.0805    | 0.0645    | 0.0795    | 0.0747    | 0.0827    |
| 0.1097    | 0.0766    | 0.1137    | 0.067     | 0.1399    | 0.1618    | 0.1325    | 0.1356    | 0.1382    |
| 0.0428    | 0.0434    | 0.0578    | 0.0437    | 0.0721    | 0.1004    | 0.0649    | 0.0571    | 0.0558    |
| 0.0933    | 0.0343    | 0.0955    | 0.0862    | 0.0567    | 0.1023    | 0.1237    | 0.0721    | 0.0802    |
| 0.047     | 0.1005    | 0.1038    | 0.0707    | 0.1088    | 0.1084    | 0.0713    | 0.113     | 0.0959    |
| 0.085     | 0.0927    | 0.108     | 0.1167    | 0.1127    | 0.094     | 0.1114    | 0.0757    | 0.0926    |
| 0         | 0         | 0         | 0         | 0         | 0         | 0         | 0         | 0         |
| 0         | 0.0113    | 0         | 0         | 0         | 0         | 0         | 0         | 0         |
| 0.0801    | 0.0615    | 0.0656    | 0.0531    | 0.0716    | 0.0859    | 0.1338    | 0.0908    | 0.0485    |
| 0         | 0         | 0         | 0.0057    | 0         | 0         | 0.0048    | 0.0181    | 0         |
| 0.0154    | 0.0191    | 0.0012    | 0.0173    | 0         | 0         | 0.0031    | 0.0105    | 0.0071    |
| 0.3662    | 0.2153    | 0.2183    | 0.1362    | 0.2393    | 0.3344    | 0.0978    | 0.2367    | 0.2291    |
| 0.0358    | 0.036     | 0.0278    | 0.0371    | 0.0317    | 0.0289    | 0.0269    | 0.039     | 0.0411    |
| 0.0757    | 0.1384    | 0.1314    | 0.0183    | 0.138     | 0.109     | 0.0993    | 0.1065    | 0.1478    |
| 0.0109    | 0.028     | 0.0292    | 0.0405    | 0.0288    | 0         | 0.007     | 0.0068    | 0.0069    |
| 0         | 0         | 0         | 0         | 0         | 0         | 0         | 0         | 0         |
| 0         | 0.0081    | 0.0094    | 0         | 0.0058    | 0         | 0.0101    | 0         | 0         |
| 0.0017    | 0.0051    | 0.0057    | 0.0149    | 0.005     | 0         | 0.0072    | 0.0032    | 0.0013    |
| 0         | 0         | 0         | 0         | 0         | 0         | 0         | 0         | 0.0076    |
| 0         | 0         | 0         | 0         | 2.00E-04  | 0         | 0.061     | 0.0344    | 0.0254    |
| 0         | 0.0276    | 0.0147    | 0         | 0.0197    | 0.0738    | 0.0039    | 0.0961    | 0.073     |
| 0.1916    | 0.0323    | 0         | 0         | 0         | 0.0226    | 0.097     | 0.0313    | 0.0742    |
| 0.0562    | 0.0443    | 0.0442    | 0.0918    | 0.0471    | 0.0324    | 0.0503    | 0.0595    | 0.0214    |
| 0.0101    | 0.0026    | 0.0073    | 0.0306    | 0.0044    | 0         | 0.009     | 0.049     | 0         |
| 0.015     | 0         | 0         | 0.0335    | 0         | 0         | 0         | 0         | 0         |
| 0.0074    | 0.0115    | 0.0149    | 0         | 0.0193    | 0.0127    | 0.01      | 0.0207    | 0.0243    |
| 0.1273    | 0.1931    | 0.254     | 0.0908    | 0.2122    | 0.1289    | 0.1905    | 0.2707    | 0.276     |
| 0         | 0.0146    | 0.0126    | 0.0032    | 0.0089    | 0.0093    | 0.0036    | 0.0084    | 0.0111    |
| 0.0144    | 0.0356    | 0.0189    | 0.0671    | 0.0387    | 0.0063    | 0.0752    | 0.0602    | 0.0692    |
| 0         | 8.00E-04  | 0         | 5.00E-04  | 0         | 0         | 0.002     | 0         | 0         |
| 0         | 0         | 0         | 0.0472    | 0         | 0         | 0         | 0         | 0         |
| 0         | 0.016     | 0.0156    | 0.0109    | 0.0147    | 0.0126    | 0.0077    | 0.0074    | 0.0087    |
| 0.1132    | 0.1221    | 0.1966    | 0.2044    | 0.1263    | 0.1849    | 0.2078    | 0.1092    | 0.1456    |
| 0.1771    | 0.2622    | 0.0729    | 0.199     | 0.0766    | 0.1095    | 0.1358    | 0.2203    | 0.1761    |
| 0         | 0         | 0.0021    | 0.0036    | 0.0039    | 0         | 0.0055    | 0         | 0         |
| 0.0523    | 0.0742    | 0.0238    | 0.0756    | 0.0396    | 0.0669    | 0.0361    | 0.035     | 0         |
| 0.3218    | 0.2537    | 0.2624    | 0.2744    | 0.2575    | 0.2161    | 0.2617    | 0.276     | 0.2109    |
| 0.076     | 0.0395    | 0.0366    | 0.0457    | 0.0337    | 0.0286    | 0.041     | 0.0447    | 0.0397    |
| 0         | 0.0281    | 0.0077    | 0.0176    | 0.0062    | 0.0057    | 0.0304    | 0         | 0.0223    |
| 0.1006    | 0.1208    | 0.1694    | 0.0525    | 0.1443    | 0.0945    | 0.1152    | 0.1537    | 0.1825    |
| 0.0616    | 0.0833    | 0.1066    | 0.0813    | 0.1125    | 0.0797    | 0.0804    | 0.0836    | 0.0886    |

|        |          |        |        |        |          |        |        |          |
|--------|----------|--------|--------|--------|----------|--------|--------|----------|
| 0.0017 | 4.00E-04 | 0.004  | 0      | 0.0024 | 0.0029   | 0.0037 | 0.0025 | 0.0044   |
| 0.0064 | 0        | 0      | 0      | 0      | 6.00E-04 | 0      | 0.0018 | 0.0049   |
| 0.0657 | 0.1332   | 0.1973 | 0.1535 | 0.2032 | 0.159    | 0.1888 | 0.153  | 0.1474   |
| 0.0081 | 0        | 0.0146 | 0.0083 | 0.0105 | 0.0341   | 0.0019 | 0.0062 | 0.005    |
| 0.2186 | 0.1806   | 0.1986 | 0.1517 | 0.1543 | 0.1278   | 0.1898 | 0.1628 | 0.1944   |
| 0.0015 | 0.0129   | 0.0221 | 0.0219 | 0.0246 | 0.0219   | 0.0291 | 0.0229 | 0        |
| 0.0074 | 0.0213   | 0.0074 | 0.0022 | 0.028  | 0        | 0.002  | 0.0266 | 0.0388   |
| 0      | 0        | 0.0037 | 0      | 0      | 0.0059   | 0.0095 | 0.0679 | 0.0112   |
| 0.0091 | 0.0444   | 0.0293 | 0.061  | 0.0084 | 0        | 0.0891 | 0.04   | 0.0207   |
| 0.0074 | 0        | 0.0029 | 0.0119 | 0      | 0.0074   | 0.0109 | 0      | 6.00E-04 |
| 0.0753 | 0.0547   | 0.0319 | 0.0513 | 0.0374 | 0.037    | 0.0636 | 0.0643 | 0.0654   |
| 0.1189 | 0.0697   | 0.0357 | 0.0547 | 0.0423 | 0.0488   | 0.0525 | 0.0749 | 0.0717   |
| 0.0826 | 0.1344   | 0.1172 | 0.1571 | 0.1615 | 0.1013   | 0.1199 | 0.152  | 0.1535   |
| 0      | 0        | 0      | 0.0237 | 0      | 0        | 0.03   | 0      | 0        |
| 0      | 0        | 0      | 0      | 0      | 0        | 0      | 0      | 0.0032   |
| 0.6099 | 0.5125   | 0.5567 | 0.5619 | 0.6151 | 0.6748   | 0.5573 | 0.5878 | 0.5674   |
| 0.0269 | 0.0344   | 0.0235 | 0.0446 | 0.0268 | 0        | 0.0115 | 0.0188 | 0.0164   |
| 0.6368 | 0.5469   | 0.5802 | 0.6066 | 0.6419 | 0.6748   | 0.5688 | 0.6066 | 0.5838   |

GSM110085GSM110085 GSM110085GSM110085GSM110086GSM110086GSM1100862

|        |          |        |        |        |          |        |
|--------|----------|--------|--------|--------|----------|--------|
| 0.0087 | 5.00E-04 | 0.0128 | 0.0028 | 0.0126 | 0.0068   | 0.0223 |
| 0      | 0        | 0      | 0      | 0      | 0        | 0      |
| 0.2341 | 0.1624   | 0.1726 | 0.1441 | 0.0975 | 0.1275   | 0.1151 |
| 0.0028 | 0        | 0      | 0.0077 | 0      | 0.0616   | 0      |
| 0.1487 | 0.0975   | 0.1426 | 0.1737 | 0.1137 | 0.1236   | 0.1636 |
| 0.0297 | 0.0515   | 0.1018 | 0.063  | 0.0512 | 0.0576   | 0.0881 |
| 0.0197 | 0.0236   | 0.0545 | 0.0268 | 0.0277 | 0.0467   | 0.0488 |
| 0.2206 | 0.1751   | 0.2156 | 0.2457 | 0.1829 | 0.1507   | 0.2287 |
| 0.092  | 0.0353   | 0.101  | 0.1042 | 0.0556 | 0.0917   | 0.0704 |
| 0.1516 | 0.1375   | 0.1163 | 0.1361 | 0.094  | 0.1029   | 0.1119 |
| 0.0759 | 0.0653   | 0.0473 | 0.0766 | 0.0525 | 0.0441   | 0.0516 |
| 0.0833 | 0.1368   | 0.1068 | 0.0669 | 0.0725 | 0.073    | 0.0703 |
| 0.0922 | 0.1047   | 0.0943 | 0.0849 | 0.0893 | 0.0823   | 0.0878 |
| 0.1132 | 0.1116   | 0.0889 | 0.1045 | 0.0957 | 0.0614   | 0.0976 |
| 0      | 0        | 0      | 0      | 0      | 0        | 0      |
| 0      | 0        | 0.0096 | 0.0147 | 0      | 0        | 0      |
| 0.1163 | 0.0744   | 0.0619 | 0.0424 | 0.0507 | 0.0951   | 0.0442 |
| 0      | 0        | 0      | 0      | 0.0049 | 0        | 0      |
| 0.0033 | 0.0065   | 0.0219 | 0.0039 | 0      | 0.0019   | 0.0011 |
| 0.1525 | 0.169    | 0.1872 | 0.1506 | 0.3562 | 0.2704   | 0.2116 |
| 0.0222 | 0.0262   | 0.0112 | 0.0282 | 0.0456 | 0.0602   | 0.0315 |
| 0.0745 | 0.1699   | 0.1134 | 0.1251 | 0.062  | 0.1342   | 0.1312 |
| 0.0251 | 0.0265   | 0.0257 | 0.0309 | 0      | 0.019    | 0.0185 |
| 0      | 0        | 0      | 0      | 0.0102 | 0        | 0      |
| 0.0038 | 0        | 0.0012 | 0.0032 | 0      | 0        | 0      |
| 0.0044 | 0.0061   | 0.0131 | 0.009  | 0      | 0        | 0.0142 |
| 0      | 0        | 0.0034 | 0      | 0      | 0.0018   | 0      |
| 0      | 0        | 0      | 0      | 0      | 0.0073   | 0.0664 |
| 0.0319 | 0.0408   | 0      | 0.0417 | 0.0942 | 0.0402   | 0.0437 |
| 0      | 0.0311   | 0.0031 | 0.0261 | 0.0579 | 0.2016   | 0.0577 |
| 0.0384 | 0.0651   | 0.0307 | 0.0574 | 0.0438 | 0.0379   | 0.0137 |
| 0.0082 | 0.0201   | 0.0016 | 0.0069 | 0.0053 | 0.026    | 0      |
| 0      | 0        | 0      | 0      | 0      | 5.00E-04 | 0      |
| 0.0128 | 0.0083   | 0      | 0.0149 | 0.0109 | 0.0052   | 0.0135 |
| 0.1327 | 0.1895   | 0.1965 | 0.1316 | 0.2059 | 0.1096   | 0.179  |
| 0.012  | 0.0105   | 0.0123 | 0.021  | 0.0067 | 0.0183   | 0.016  |
| 0.0791 | 0.0453   | 0.0688 | 0.0603 | 0.0215 | 0.0558   | 0.0362 |
| 0      | 0        | 0.0049 | 0.0017 | 0      | 0.0094   | 0      |
| 0      | 0        | 0      | 0      | 0      | 0        | 0      |
| 0.0143 | 0.0099   | 0.0174 | 0.0169 | 0.0114 | 0        | 0.0127 |
| 0.1967 | 0.1909   | 0.2104 | 0.1453 | 0.1544 | 0.143    | 0.1776 |
| 0.0988 | 0.1372   | 0.111  | 0.0583 | 0.1509 | 0.2552   | 0.0818 |
| 0.0029 | 0.0015   | 0.0045 | 0.0046 | 0      | 0        | 0      |
| 0.0329 | 0.0288   | 0.0347 | 0.0413 | 0.042  | 0.0431   | 0.056  |
| 0.2793 | 0.298    | 0.2367 | 0.2377 | 0.2537 | 0.2371   | 0.2433 |
| 0.0352 | 0.0351   | 0.0396 | 0.0388 | 0.0406 | 0.0541   | 0.0454 |
| 0.0629 | 0.0205   | 0.0046 | 0.0108 | 0      | 0.0336   | 0.0325 |
| 0.085  | 0.1267   | 0.1323 | 0.1102 | 0.1282 | 0.0685   | 0.1089 |
| 0.1079 | 0.0836   | 0.0955 | 0.0942 | 0.0873 | 0.0583   | 0.0946 |

|        |          |          |        |        |        |        |
|--------|----------|----------|--------|--------|--------|--------|
| 0.0029 | 0.0019   | 0.0048   | 0.0054 | 0.0034 | 0.0047 | 0.0047 |
| 0      | 0        | 2.00E-04 | 0.0028 | 0.0069 | 0.0101 | 0.0011 |
| 0.1934 | 0.1721   | 0.1788   | 0.1691 | 0.1301 | 0.04   | 0.157  |
| 0.0144 | 0        | 0.0061   | 0.0129 | 0.0178 | 0.0132 | 0.0185 |
| 0.1411 | 0.2297   | 0.1864   | 0.1642 | 0.1798 | 0.1563 | 0.159  |
| 0.0508 | 0.0224   | 0.0255   | 0.0054 | 0.0163 | 0      | 0.0143 |
| 0.0159 | 9.00E-04 | 1.00E-04 | 0.0053 | 0.0263 | 0.0038 | 0.0395 |
| 0.0055 | 2.00E-04 | 0.0142   | 0.0126 | 0      | 0      | 0      |
| 0.037  | 0.0279   | 0.0171   | 0.0597 | 0.0175 | 0.0331 | 0.0105 |
| 0      | 0.02     | 0.0352   | 0      | 0.0519 | 0.0039 | 0.0041 |
| 0.0403 | 0.0521   | 0.0625   | 0.0372 | 0.0481 | 0.0711 | 0.0576 |
| 0.0296 | 0.048    | 0.0741   | 0.0496 | 0.0473 | 0.0898 | 0.0506 |
| 0.1879 | 0.1764   | 0.1789   | 0.1405 | 0.1193 | 0.1047 | 0.1298 |
| 0.0093 | 0.007    | 0        | 0.0036 | 0      | 0.0028 | 0      |
| 0.0026 | 0.0061   | 0.0026   | 0.0069 | 0      | 0      | 0      |
| 0.6451 | 0.573    | 0.5963   | 0.5756 | 0.6116 | 0.5691 | 0.5753 |
| 0.0186 | 0.0168   | 0.0302   | 0.0188 | 0.0063 | 0.0138 | 0.021  |
| 0.6637 | 0.5898   | 0.6265   | 0.5944 | 0.6179 | 0.5829 | 0.5963 |

**Supplementary Table S6: Immune cell enrichment of GSE110169.**

|           | case        | control     |             |             |          |           |
|-----------|-------------|-------------|-------------|-------------|----------|-----------|
| CD4+ naiv | 0.002528049 | 0.002907771 | 0.005868831 | 0.003154331 | 9.27E-11 | GSE110169 |
| Macrophag | 0.014181707 | 0.005415664 | 0.008585714 | 0.004919716 | 2.00E-10 | GSE110169 |
| aDC       | 0.00780122  | 0.004419108 | 0.003737662 | 0.003311505 | 8.72E-10 | GSE110169 |
| CD4+ T-ce | 0.016382927 | 0.007106193 | 0.021790909 | 0.004571081 | 6.79E-08 | GSE110169 |
| Macrophag | 0.003990244 | 0.003878482 | 0.001257143 | 0.00203013  | 1.41E-07 | GSE110169 |
| Microenvi | 0.04112439  | 0.010096309 | 0.048775325 | 0.009271847 | 1.76E-06 | GSE110169 |
| CMP       | 0.003708537 | 0.003642893 | 0.001423377 | 0.002152654 | 4.07E-06 | GSE110169 |
| ImmuneScc | 0.038404878 | 0.009442704 | 0.044966234 | 0.008517406 | 9.00E-06 | GSE110169 |
| CD4+ memc | 0.011247561 | 0.006077772 | 0.015474026 | 0.005496516 | 9.06E-06 | GSE110169 |
| Osteoblas | 0.00339878  | 0.005411681 | 0.007687013 | 0.006565146 | 1.29E-05 | GSE110169 |
| Erythrocy | 0.002097561 | 0.00236909  | 0.000898701 | 0.001117739 | 8.41E-05 | GSE110169 |
| cDC       | 0.002415854 | 0.002934363 | 0.004127273 | 0.002848529 | 0.000269 | GSE110169 |
| Keratinoc | 0.007612195 | 0.002659824 | 0.006076623 | 0.002567197 | 0.000298 | GSE110169 |
| iDC       | 0.011180488 | 0.007364554 | 0.014823377 | 0.006432399 | 0.001146 | GSE110169 |
| Preadipoc | 0.003030488 | 0.00385617  | 0.005038961 | 0.00403257  | 0.001608 | GSE110169 |
| Adipocyte | 0.00309878  | 0.004454003 | 0.005514286 | 0.005196728 | 0.001937 | GSE110169 |
| MSC       | 0.091813415 | 0.031026977 | 0.076294805 | 0.033353943 | 0.002777 | GSE110169 |
| Epithelia | 0.004337805 | 0.003275824 | 0.005746753 | 0.003155804 | 0.00649  | GSE110169 |
| Mast cell | 0.000935366 | 0.000720317 | 0.001263636 | 0.000820928 | 0.00805  | GSE110169 |
| Platelets | 0.005252439 | 0.004008239 | 0.003809091 | 0.003041562 | 0.011875 | GSE110169 |
| pro B-cel | 0.00277439  | 0.003101446 | 0.001698701 | 0.002266315 | 0.014054 | GSE110169 |
| CD8+ T-ce | 0.006209756 | 0.004764649 | 0.007755844 | 0.0036328   | 0.023352 | GSE110169 |
| Tregs     | 0.010540244 | 0.006464564 | 0.012751948 | 0.005786454 | 0.024703 | GSE110169 |
| CLP       | 0.010330488 | 0.003986232 | 0.008988312 | 0.003455353 | 0.025052 | GSE110169 |
| Class-swi | 0.004642683 | 0.003544393 | 0.005777922 | 0.002778613 | 0.026635 | GSE110169 |
| Tgd cells | 0.00405122  | 0.004149676 | 0.00285974  | 0.002266591 | 0.027398 | GSE110169 |
| Melanocyt | 0.006132927 | 0.001996976 | 0.005446753 | 0.001979074 | 0.031149 | GSE110169 |
| Eosinophi | 0.014563415 | 0.010214919 | 0.018175325 | 0.011268484 | 0.035604 | GSE110169 |
| DC        | 0.008313415 | 0.004738228 | 0.009793506 | 0.004041571 | 0.036209 | GSE110169 |
| mv Endoth | 0.011832927 | 0.006846988 | 0.009762338 | 0.005473406 | 0.037529 | GSE110169 |
| StromaScc | 0.002717073 | 0.003265563 | 0.003809091 | 0.003509693 | 0.043801 | GSE110169 |
| Myocytes  | 0.000470732 | 0.000974551 | 0.0008      | 0.001249947 | 0.064953 | GSE110169 |
| MPP       | 0.00032561  | 0.000978764 | 0.000107792 | 0.000352348 | 0.067132 | GSE110169 |
| Memory B- | 0.002796341 | 0.003097249 | 0.003761039 | 0.003617834 | 0.072265 | GSE110169 |
| Smooth mu | 0           | 0           | 0.000219481 | 0.001102394 | 0.073267 | GSE110169 |
| GMP       | 0.001596341 | 0.002466589 | 0.001006494 | 0.001659291 | 0.080738 | GSE110169 |
| ly Endoth | 0.009941463 | 0.005153974 | 0.008646753 | 0.004526343 | 0.095206 | GSE110169 |
| NKT       | 0.015009756 | 0.010570546 | 0.012285714 | 0.010392111 | 0.103579 | GSE110169 |
| Endotheli | 0.002073171 | 0.002677204 | 0.00147013  | 0.00208838  | 0.116879 | GSE110169 |
| CD4+ Tcm  | 0.007232927 | 0.004552168 | 0.008328571 | 0.004610739 | 0.133743 | GSE110169 |
| Fibroblas | 0.000278049 | 0.001161951 | 0.000635065 | 0.001988901 | 0.165831 | GSE110169 |
| Macrophag | 5.49E-05    | 0.000234206 | 0.000133766 | 0.00047173  | 0.179627 | GSE110169 |
| Plasma ce | 0.00325     | 0.003804651 | 0.002492208 | 0.003249849 | 0.180138 | GSE110169 |
| Hepatocyt | 0.000442683 | 0.000934395 | 0.000635065 | 0.000892773 | 0.186868 | GSE110169 |
| Skeletal  | 0.001154878 | 0.001244856 | 0.001409091 | 0.001306983 | 0.210933 | GSE110169 |
| MEP       | 0.000304878 | 0.000808123 | 0.000519481 | 0.001416541 | 0.238862 | GSE110169 |
| Neurons   | 0.002954878 | 0.001370514 | 0.002666234 | 0.001728447 | 0.243613 | GSE110169 |
| CD4+ Tem  | 0.003581707 | 0.004002873 | 0.002945455 | 0.003303967 | 0.277744 | GSE110169 |
| NK cells  | 0.001984146 | 0.002738138 | 0.00245974  | 0.002773382 | 0.278374 | GSE110169 |

|            |             |             |             |             |          |           |
|------------|-------------|-------------|-------------|-------------|----------|-----------|
| Basophils  | 0.010230488 | 0.007672086 | 0.008861039 | 0.00864438  | 0.291713 | GSE110169 |
| CD8+ Tem   | 8.66E-05    | 0.000416855 | 3.38E-05    | 0.000242037 | 0.334076 | GSE110169 |
| Neutrophil | 0.001097561 | 0.002614205 | 0.000722078 | 0.002869468 | 0.389274 | GSE110169 |
| HSC        | 0.000737805 | 0.001917601 | 0.000538961 | 0.001334083 | 0.451727 | GSE110169 |
| CD8+ Tcm   | 0.001804878 | 0.003082804 | 0.001475325 | 0.002363826 | 0.452631 | GSE110169 |
| Th2 cells  | 0.014958537 | 0.006053648 | 0.014319481 | 0.004802194 | 0.463809 | GSE110169 |
| Megakaryoc | 0.000573171 | 0.000788975 | 0.000483117 | 0.000833099 | 0.48493  | GSE110169 |
| Chondrocy  | 0.000464634 | 0.001902459 | 0.000306494 | 0.001464792 | 0.559661 | GSE110169 |
| Mesangial  | 0.000109756 | 0.000412044 | 8.18E-05    | 0.0004285   | 0.675725 | GSE110169 |
| Sebocytes  | 0.000209756 | 0.000212341 | 0.000222078 | 0.000218622 | 0.718977 | GSE110169 |
| CD8+ naiv  | 0.013528049 | 0.006325654 | 0.013728571 | 0.005301287 | 0.829329 | GSE110169 |
| B-cells    | 0.004123171 | 0.003967874 | 0.004232468 | 0.003643395 | 0.856936 | GSE110169 |
| naive B-c  | 0.002896341 | 0.002900423 | 0.002954545 | 0.002591309 | 0.894264 | GSE110169 |
| Pericytes  | 0.016218293 | 0.002895468 | 0.016272727 | 0.003407524 | 0.913525 | GSE110169 |
| Th1 cells  | 0.004830488 | 0.003044026 | 0.004850649 | 0.002566004 | 0.964157 | GSE110169 |
| pDC        | 0.00105     | 0.00163626  | 0.001041558 | 0.001681897 | 0.974453 | GSE110169 |
| Astrocyte  | 0           | 0           | 0           | 0           | #DIV/0!  | GSE110169 |
| Monocytes  | 0           | 0           | 0           | 0           | #DIV/0!  | GSE110169 |

| case        | control     |          |             |             | mean                  |
|-------------|-------------|----------|-------------|-------------|-----------------------|
| 0.039682813 | 0.036342308 | 0.070845 | 0.024447397 | 0.000576705 | GSE121239 0.023207071 |
| 0.034075    | 0.02966077  | 0.009485 | 0.013466929 | 0.000576021 | GSE121239 0.014477778 |
| 0.018704688 | 0.018608331 | 0.01258  | 0.023172048 | 0.229775791 | GSE121239 4.75E-05    |
| 0.115348438 | 0.059788824 | 0.127055 | 0.026853021 | 0.399672353 | GSE121239 0.12669798  |
| 0.037923438 | 0.029292947 | 0.02069  | 0.016137465 | 0.014121    | GSE121239 0.011883838 |
| 0.44559375  | 0.08230126  | 0.54661  | 0.036157825 | 9.05E-07    | GSE121239 0.211150505 |
| 0.053776563 | 0.062214908 | 0.00899  | 0.010600839 | 0.002003845 | GSE121239 0.017111111 |
| 0.424535938 | 0.077757091 | 0.519465 | 0.041633859 | 1.35E-06    | GSE121239 0.101956566 |
| 0.158370313 | 0.073699367 | 0.17455  | 0.034767748 | 0.346694888 | GSE121239 0.061161616 |
| 0.188332813 | 0.061635416 | 0.25071  | 0.030342066 | 3.88E-05    | GSE121239 0.028525253 |
| 0.060323438 | 0.047695312 | 0.07033  | 0.03599911  | 0.390576299 | GSE121239 0           |
| 0.036617188 | 0.032823088 | 0.05584  | 0.026665874 | 0.019539744 | GSE121239 0.15999798  |
| 0.00983125  | 0.009630571 | 0.00525  | 0.007835983 | 0.056536076 | GSE121239 0.154070707 |
| 0.02393125  | 0.025649851 | 0.034875 | 0.020696678 | 0.086104357 | GSE121239 0.267783838 |
| 0.033735938 | 0.026518872 | 0.050565 | 0.019975914 | 0.010714858 | GSE121239 0.014567677 |
| 0.00814375  | 0.010941038 | 0.015195 | 0.010219356 | 0.012506211 | GSE121239 0.009773737 |
| 0.1480375   | 0.089630202 | 0.083765 | 0.084058985 | 0.005701804 | GSE121239 0.064346465 |
| 0.046610938 | 0.017877929 | 0.03885  | 0.012140298 | 0.073734569 | GSE121239 0.046147475 |
| 0.009846875 | 0.008160006 | 0.013525 | 0.007934195 | 0.080313177 | GSE121239 0.066307071 |
| 0.073520313 | 0.033309125 | 0.07009  | 0.040198113 | 0.703226518 | GSE121239 0.011262626 |
| 0.01646875  | 0.015450884 | 0.02101  | 0.012898262 | 0.237529526 | GSE121239 0.007938384 |
| 0.08881875  | 0.051768115 | 0.104395 | 0.026645479 | 0.200860081 | GSE121239 0.416206061 |
| 0.053275    | 0.032480935 | 0.04378  | 0.019854407 | 0.220657438 | GSE121239 0.064739394 |
| 0.071607813 | 0.03190988  | 0.07938  | 0.016209309 | 0.299170422 | GSE121239 0.049550505 |
| 0.113520313 | 0.048738421 | 0.116635 | 0.02633953  | 0.785659158 | GSE121239 0.005959596 |
| 0.007842188 | 0.014700651 | 0.00663  | 0.008942865 | 0.7285039   | GSE121239 0.01460202  |
| 0.01436875  | 0.0082931   | 0.006305 | 0.004451194 | 7.97E-05    | GSE121239 0.003674747 |
| 0.1460625   | 0.081190922 | 0.17481  | 0.069651228 | 0.157524198 | GSE121239 0.040909091 |
| 0.018445313 | 0.019248541 | 0.026375 | 0.0177707   | 0.105593634 | GSE121239 0.018458586 |
| 0.048335938 | 0.029756324 | 0.047165 | 0.027204668 | 0.875931331 | GSE121239 0.805784848 |
| 0.021059375 | 0.015499408 | 0.02715  | 0.013410699 | 0.117802326 | GSE121239 0.001009091 |
| 0.001448438 | 0.003398645 | 0.003165 | 0.003644358 | 0.056034429 | GSE121239 0.037782828 |
| 0.084290625 | 0.08856768  | 0.070145 | 0.037726432 | 0.490519845 | GSE121239 0.030792929 |
| 0.041264063 | 0.034290317 | 0.05166  | 0.02072363  | 0.203646682 | GSE121239 0.014848485 |
| 0.085034375 | 0.065567351 | 0.122255 | 0.052737827 | 0.023253556 | GSE121239 0.016222222 |
| 0.014523438 | 0.021048921 | 0.008535 | 0.011081244 | 0.227027897 | GSE121239 0.001968687 |
| 0.054535938 | 0.029823318 | 0.05094  | 0.016055312 | 0.607975496 | GSE121239 0.151038384 |
| 0.18490625  | 0.094960316 | 0.157455 | 0.069848358 | 0.236031877 | GSE121239 0.01780404  |
| 0.019851563 | 0.015286273 | 0.01984  | 0.012212608 | 0.997546203 | GSE121239 0.022786869 |
| 0.026754688 | 0.031900256 | 0.01375  | 0.017593794 | 0.086036408 | GSE121239 0.021057576 |
| 0.014123438 | 0.02017693  | 0.019275 | 0.018612386 | 0.313405662 | GSE121239 0.000423232 |
| 0.011290625 | 0.011326409 | 0.00489  | 0.009785322 | 0.025593742 | GSE121239 0.819975758 |
| 0.037484375 | 0.03253431  | 0.02391  | 0.016215843 | 0.07678583  | GSE121239 1.92E-05    |
| 0.004621875 | 0.005357815 | 0.002155 | 0.003590994 | 0.057786082 | GSE121239 0.138867677 |
| 0.005110938 | 0.005430955 | 0.00492  | 0.006130304 | 0.894457258 | GSE121239 0.139973737 |
| 0.009178125 | 0.020013983 | 0.007175 | 0.016058278 | 0.684415083 | GSE121239 0.053111111 |
| 0.001785938 | 0.002844201 | 0.0016   | 0.002128751 | 0.788386961 | GSE121239 0.002085859 |
| 0.03306875  | 0.031496127 | 0.04757  | 0.01888528  | 0.054886951 | GSE121239 0.097193939 |
| 0.049404688 | 0.043778448 | 0.114045 | 0.039095719 | 7.72E-08    | GSE121239 0.004923232 |



|             |             |          |             |             |           |             |
|-------------|-------------|----------|-------------|-------------|-----------|-------------|
| 0.029626563 | 0.040766724 | 0.008735 | 0.016677381 | 0.028704794 | GSE121239 | 0.194486869 |
| 0.048225    | 0.04328688  | 0.07188  | 0.024863598 | 0.022771824 | GSE121239 | 0.16529697  |
| 0.043176563 | 0.034609737 | 0.03007  | 0.018071702 | 0.108816628 | GSE121239 | 0.247221212 |
| 0.0154625   | 0.020482734 | 0.003485 | 0.008462753 | 0.012983415 | GSE121239 | 0.138414141 |
| 0.059184375 | 0.041438412 | 0.06538  | 0.016616973 | 0.51732906  | GSE121239 | 0.00929697  |
| 0.041978125 | 0.032307159 | 0.02856  | 0.019139306 | 0.082320232 | GSE121239 | 0.021341414 |
| 0.108425    | 0.053427355 | 0.099775 | 0.061107514 | 0.543167585 | GSE121239 | 0.050756566 |
| 0.016346875 | 0.027806171 | 0.001325 | 0.003945534 | 0.018723893 | GSE121239 | 0.104922222 |
| 0.0090875   | 0.010937535 | 0.008985 | 0.00923137  | 0.969886682 | GSE121239 | 0.045681818 |
| 0.002326563 | 0.001772474 | 0.00231  | 0.001669195 | 0.97060348  | GSE121239 | 0.006385859 |
| 0.027471875 | 0.023756566 | 0.051205 | 0.027945181 | 0.000343041 | GSE121239 | 0.001746465 |
| 0.127478125 | 0.077258501 | 0.166735 | 0.033530619 | 0.030527368 | GSE121239 | 0.00100404  |
| 0.100865625 | 0.06132184  | 0.15219  | 0.024792718 | 0.00047763  | GSE121239 | 0.037631313 |
| 0.028901563 | 0.015954981 | 0.028835 | 0.012159479 | 0.986367353 | GSE121239 | 0.014186869 |
| 0.1696375   | 0.056101033 | 0.178375 | 0.025193209 | 0.502562333 | GSE121239 | 0.088535354 |
| 0.005645313 | 0.012208388 | 0.000665 | 0.002083336 | 0.074140244 | GSE121239 | 0.153069697 |
| 0           | 0           | 0        | 0           | #DIV/0!     | GSE121239 | 0.070161616 |
| 0.00029375  | 0.00235     | 0.001485 | 0.006641122 | 0.224913187 | GSE121239 | 0.002993939 |

control

|             |          |             |             |          |
|-------------|----------|-------------|-------------|----------|
| 0.031768866 | 0.01433  | 0.014709583 | 0.141329897 | GSE61635 |
| 0.01426006  | 0.024907 | 0.016859642 | 0.001030174 | GSE61635 |
| 0.000472368 | 0        | 0           | 0.58398475  | GSE61635 |
| 0.085641643 | 0.193373 | 0.045436283 | 7.73E-05    | GSE61635 |
| 0.035374024 | 0        | 0           | 0.06884036  | GSE61635 |
| 0.076347279 | 0.308483 | 0.033098225 | 4.11E-10    | GSE61635 |
| 0.02485082  | 0.042793 | 0.030950549 | 7.44E-06    | GSE61635 |
| 0.057617412 | 0.193383 | 0.032056245 | 1.35E-13    | GSE61635 |
| 0.05662678  | 0.15898  | 0.028479629 | 1.58E-15    | GSE61635 |
| 0.029171125 | 0.037497 | 0.025101374 | 0.130632084 | GSE61635 |
| 0           | 0        | 0           | #DIV/0!     | GSE61635 |
| 0.063461717 | 0.21495  | 0.030452006 | 1.11E-05    | GSE61635 |
| 0.045573516 | 0.18025  | 0.026040496 | 0.003286813 | GSE61635 |
| 0.083779751 | 0.3486   | 0.052311698 | 1.95E-06    | GSE61635 |
| 0.023891425 | 0.056127 | 0.026130969 | 2.73E-13    | GSE61635 |
| 0.01983496  | 0        | 0           | 0.008070458 | GSE61635 |
| 0.041425067 | 0.096617 | 0.017721156 | 6.18E-05    | GSE61635 |
| 0.024575242 | 0.05357  | 0.013424916 | 0.116266884 | GSE61635 |
| 0.09140092  | 0.028457 | 0.03994401  | 0.029567639 | GSE61635 |
| 0.021981702 | 0.011513 | 0.012926816 | 0.952777535 | GSE61635 |
| 0.011979214 | 0.003207 | 0.006302213 | 0.040072827 | GSE61635 |
| 0.139647114 | 0.30952  | 0.089007289 | 0.000132364 | GSE61635 |
| 0.020741533 | 0.05151  | 0.011873423 | 0.001150762 | GSE61635 |
| 0.065776677 | 0.193213 | 0.033835899 | 2.19E-21    | GSE61635 |
| 0.014147423 | 0.000343 | 0.001492899 | 0.03226903  | GSE61635 |
| 0.02843726  | 0.01698  | 0.017517762 | 0.66568057  | GSE61635 |
| 0.007065876 | 0.000913 | 0.002064266 | 0.036974621 | GSE61635 |
| 0.041755797 | 0.07011  | 0.022430819 | 0.000360063 | GSE61635 |
| 0.028639914 | 0.02593  | 0.021048845 | 0.188167627 | GSE61635 |
| 0.095503875 | 0.87016  | 0.040341581 | 0.000473608 | GSE61635 |
| 0.003810648 | 0.00051  | 0.00159403  | 0.486718615 | GSE61635 |
| 0.022144558 | 0.043103 | 0.014487723 | 0.218588804 | GSE61635 |
| 0.040726813 | 0.009423 | 0.011104758 | 0.005332684 | GSE61635 |
| 0.017643495 | 0.003317 | 0.006057374 | 0.000621892 | GSE61635 |
| 0.020420246 | 0        | 0           | 2.89E-05    | GSE61635 |
| 0.004248521 | 0.000203 | 0.000617829 | 0.025357598 | GSE61635 |
| 0.092659874 | 0.14257  | 0.06648667  | 0.642701094 | GSE61635 |
| 0.008297441 | 0.005353 | 0.004861441 | 1.87E-12    | GSE61635 |
| 0.03355965  | 0.059577 | 0.022079959 | 1.06E-07    | GSE61635 |
| 0.041019495 | 0.06738  | 0.047283411 | 6.90E-07    | GSE61635 |
| 0.001649479 | 0        | 0           | 0.163493033 | GSE61635 |
| 0.093248405 | 0.88439  | 0.041523764 | 0.000359285 | GSE61635 |
| 0.000190957 | 0        | 0           | 0.58398475  | GSE61635 |
| 0.124392895 | 0.182137 | 0.054807824 | 0.066977036 | GSE61635 |
| 0.089019258 | 0.189367 | 0.045868931 | 0.004164073 | GSE61635 |
| 0.023946969 | 0.0398   | 0.014979296 | 0.004747509 | GSE61635 |
| 0.003762083 | 0.011283 | 0.004858841 | 5.32E-20    | GSE61635 |
| 0.066330379 | 0.159593 | 0.032356697 | 2.15E-06    | GSE61635 |
| 0.00731844  | 0.002027 | 0.00265017  | 0.035853359 | GSE61635 |

|             |          |             |             |          |
|-------------|----------|-------------|-------------|----------|
| 0.052191006 | 0.136617 | 0.035974024 | 9.10E-08    | GSE61635 |
| 0.078588008 | 0.23625  | 0.051374928 | 8.32E-06    | GSE61635 |
| 0.106569968 | 0.026253 | 0.033115854 | 1.36E-20    | GSE61635 |
| 0.068370606 | 0.164223 | 0.039860539 | 0.051542351 | GSE61635 |
| 0.023002504 | 0.050543 | 0.028475394 | 3.42E-13    | GSE61635 |
| 0.014430573 | 0.027747 | 0.008267457 | 0.022233969 | GSE61635 |
| 0.038978699 | 0.028723 | 0.01997346  | 0.003516258 | GSE61635 |
| 0.058964731 | 0.132197 | 0.034827372 | 0.017592934 | GSE61635 |
| 0.025482468 | 0.068843 | 0.011770292 | 4.11E-06    | GSE61635 |
| 0.018757507 | 0.02329  | 0.015438763 | 1.56E-05    | GSE61635 |
| 0.002436932 | 0.005497 | 0.001863716 | 2.42E-12    | GSE61635 |
| 0.004744361 | 0        | 0           | 0.249864438 | GSE61635 |
| 0.042253206 | 0.041943 | 0.024322853 | 0.595681559 | GSE61635 |
| 0.01275606  | 0.014227 | 0.009162402 | 0.987360477 | GSE61635 |
| 0.030545614 | 0.10931  | 0.016856399 | 0.000525995 | GSE61635 |
| 0.06405509  | 0.140823 | 0.037022227 | 0.32103688  | GSE61635 |
| 0.034671645 | 0.09185  | 0.021277862 | 0.001521084 | GSE61635 |
| 0.012351855 | 0        | 0           | 0.187886148 | GSE61635 |

### Supplementary Table S7: Immune cell enrichment of GSE121239.

|           | GSM342833 | GSM342833 | GSM342833 | GSM342834 | GSM342835 | GSM342835 | GSM342836 | GSM342836 |
|-----------|-----------|-----------|-----------|-----------|-----------|-----------|-----------|-----------|
| NK cells  | 0         | 0.121     | 0.0585    | 0         | 0         | 0.0196    | 0         | 0.0801    |
| Microenvi | 0.339     | 0.5727    | 0.5306    | 0.3605    | 0.287     | 0.4121    | 0.3583    | 0.4821    |
| ImmuneSc  | 0.339     | 0.5417    | 0.4961    | 0.3264    | 0.287     | 0.3875    | 0.3583    | 0.4691    |
| Osteoblas | 0.1577    | 0.1766    | 0.1656    | 0.225     | 0.135     | 0.2976    | 0.2382    | 0.2225    |
| Melanocyt | 0.0168    | 0.0234    | 0.0152    | 0.0157    | 0.0095    | 0.0106    | 0.0155    | 0.0123    |
| CD8+ naiv | 0.0571    | 0         | 0.0058    | 0.0467    | 0.0134    | 0.0194    | 0.0438    | 0         |
| naive B-c | 0.0861    | 0.1638    | 0.1096    | 0.0165    | 0.031     | 0.0525    | 0.089     | 0.1068    |
| Macrophag | 0.0317    | 0         | 0         | 0.0352    | 0.0309    | 0.0468    | 0.0851    | 0         |
| CD4+ naiv | 0         | 0         | 0.0554    | 0.1422    | 0         | 0.0857    | 0.0148    | 0.0544    |
| CMP       | 0.1308    | 0.0392    | 0.0329    | 0.0046    | 0.2844    | 0.019     | 0.0552    | 0.0122    |
| MSC       | 0.1744    | 0.1282    | 0.2798    | 0.2784    | 0         | 0.2255    | 0.1469    | 0.2534    |
| Preadipoc | 0.0198    | 0.0657    | 0.0131    | 0.0491    | 0.0013    | 0.0459    | 0.02      | 0.0381    |
| Adipocyte | 0         | 0         | 0.0304    | 0.0093    | 0         | 0.0067    | 0         | 0.0206    |
| HSC       | 0         | 0         | 0.0513    | 0.0272    | 0.0466    | 0.0192    | 0.0076    | 0.0412    |
| Macrophag | 0.0291    | 0.0185    | 0         | 0.0559    | 0.1001    | 0.0757    | 0.068     | 0         |
| Chondrocy | 0.042     | 0         | 0         | 0         | 0.1049    | 0         | 0.0743    | 0         |
| cDC       | 0         | 0.116     | 0.0501    | 0.0865    | 0         | 0.0711    | 0.0314    | 0.0692    |
| CD8+ Tem  | 0         | 0.0828    | 0.1022    | 0.0283    | 0         | 0.0458    | 0         | 0.0919    |
| Smooth mu | 0.0035    | 0.0665    | 0         | 0.0836    | 0         | 0.1434    | 0.0117    | 0.1104    |
| Macrophag | 0         | 0         | 0         | 0.0174    | 0.0233    | 0.035     | 0.0115    | 0.0124    |
| Basophils | 0.0229    | 0.0063    | 0         | 0         | 0.1495    | 0         | 0.0552    | 0         |
| B-cells   | 0.1088    | 0.2225    | 0.1504    | 0.029     | 0         | 0.0729    | 0.1364    | 0.1595    |
| CD4+ Tem  | 0         | 0         | 0.0692    | 0.0274    | 0         | 0.074     | 0.0129    | 0.0921    |
| Myocytes  | 0         | 0.0025    | 0.0028    | 0         | 0         | 0         | 0.0164    | 0         |
| Keratinoc | 0.0138    | 0.0051    | 0.0324    | 0.0159    | 0         | 0         | 0.0034    | 0.0099    |
| Hepatocyt | 0         | 0         | 0         | 0.0037    | 0         | 0.0061    | 0         | 0.0077    |
| Epithelia | 0.0626    | 0.0341    | 0.0675    | 0.0441    | 0.0369    | 0.0277    | 0.0792    | 0.0338    |
| pDC       | 0         | 0         | 0         | 0.0322    | 0         | 0.0155    | 0         | 0.0223    |
| Plasma ce | 0.0488    | 0.0388    | 0.0067    | 0.0623    | 0.0044    | 0.0917    | 0.0611    | 0.04      |
| Mast cell | 0.0077    | 0.0276    | 0.0192    | 0.0043    | 0         | 0         | 0         | 6.00E-04  |
| Th2 cells | 0.073     | 0.0488    | 0         | 0.0016    | 0.0689    | 0.0585    | 0.0595    | 0.0147    |
| CD4+ Tcm  | 0.0178    | 0         | 0.0911    | 0.1143    | 0         | 0.0269    | 0         | 0.0807    |
| iDC       | 0         | 0.0746    | 0.0639    | 0.0288    | 0         | 0.0057    | 0.0048    | 0.0634    |
| DC        | 0         | 0.078     | 0.0073    | 0.0263    | 0         | 0.0436    | 0         | 0.0434    |
| Neutrophi | 0.0696    | 0.0041    | 0.0391    | 0         | 0.1026    | 0         | 0.0641    | 0         |
| StromaSc  | 0         | 0.031     | 0.0346    | 0.0341    | 0         | 0.0246    | 0         | 0.013     |
| Eosinophi | 0.2083    | 0.2303    | 0.1808    | 5.00E-04  | 0.2278    | 0.0229    | 0.2009    | 0.1339    |
| CD8+ T-ce | 0.0416    | 0.0535    | 0.1035    | 0.1747    | 0         | 0.1518    | 0.053     | 0.1013    |
| Memory B- | 0.009     | 0.0835    | 0.0507    | 0         | 0         | 0.0068    | 0.0603    | 0.0531    |
| Tregs     | 0.0816    | 0.0623    | 0.0668    | 0.0376    | 0         | 0.0427    | 0         | 0.0579    |
| Monocytes | 0         | 0         | 0         | 0         | 0         | 0         | 0         | 0         |
| GMP       | 0         | 0         | 0         | 0         | 0.0793    | 0.0329    | 0.0387    | 0         |
| aDC       | 0         | 0.0472    | 0         | 0.0192    | 0         | 0.0458    | 0         | 0.039     |
| NKT       | 0.3508    | 0.1504    | 0.1652    | 0.1816    | 0.1453    | 0.0638    | 0.3754    | 0.0969    |
| pro B-cel | 0.0311    | 0.0138    | 0.0552    | 0.0239    | 0.0564    | 0.0163    | 0         | 0.0439    |
| CLP       | 0.0239    | 0.0982    | 0.0778    | 0.1033    | 0.0414    | 0.1114    | 0.0335    | 0.0935    |
| Fibroblas | 0         | 0.0609    | 0.0042    | 0.0262    | 0         | 0         | 0         | 0.004     |
| CD4+ memc | 0.0743    | 0.141     | 0.2389    | 0.2222    | 0.0144    | 0.2144    | 0.0694    | 0.242     |
| Erythrocy | 0         | 0.0719    | 0.1256    | 0.1398    | 0         | 0.1063    | 0.0105    | 0.0401    |

|           |        |        |        |        |        |        |          |        |
|-----------|--------|--------|--------|--------|--------|--------|----------|--------|
| CD4+ T-ce | 0.0434 | 0.0571 | 0.1853 | 0.1989 | 0      | 0.1948 | 0.015    | 0.1848 |
| MPP       | 0.2229 | 0.0879 | 0.0584 | 0.052  | 0.3745 | 0.0141 | 0.1608   | 0.0258 |
| Th1 cells | 0.0937 | 0.1801 | 0.1939 | 0.2243 | 0.1756 | 0.2248 | 0.1549   | 0.2549 |
| CD8+ Tcm  | 0.0097 | 0.0357 | 0.039  | 0.0944 | 0      | 0.1206 | 0        | 0.0706 |
| Megakaryc | 0.168  | 0.1389 | 0.0494 | 0.1412 | 0.1698 | 0.082  | 0.1101   | 0.1054 |
| ly Endoth | 0.0642 | 0.0414 | 0.0898 | 0.0811 | 0.0212 | 0.0696 | 0        | 0.0246 |
| MEP       | 0      | 0      | 0      | 0.0815 | 0      | 0      | 0        | 0      |
| Platelets | 0.1351 | 0.0923 | 0.0287 | 0.102  | 0.0813 | 0.0739 | 0.0614   | 0.0814 |
| Tgd cells | 0      | 0      | 0      | 0      | 0      | 0.0045 | 0        | 0      |
| Class-swi | 0.1661 | 0.1776 | 0.2018 | 0.0993 | 0.0101 | 0.0853 | 0.1026   | 0.171  |
| Neurons   | 0      | 0      | 0      | 0.0031 | 0      | 0.0041 | 0        | 0      |
| mv Endoth | 0.0258 | 0.0221 | 0.0848 | 0.0609 | 0.0204 | 0.0514 | 5.00E-04 | 0.048  |
| Skeletal  | 0.0095 | 0.0068 | 0.0219 | 0.01   | 0      | 0      | 0.0114   | 0.0068 |
| Mesangial | 0.0038 | 0.0116 | 0.0193 | 0.0115 | 0.005  | 0      | 0        | 0.0241 |
| Sebocytes | 0.0024 | 0.0012 | 0.0055 | 0.0054 | 0      | 0.0035 | 0        | 0.0018 |
| Pericytes | 0.0333 | 0.0337 | 0.0526 | 0.0257 | 0.0041 | 0.0296 | 0.0105   | 0.029  |
| Endotheli | 0      | 0.001  | 0.0345 | 0.0327 | 0      | 0.0424 | 0        | 0.0015 |
| Astrocyte | 0      | 0      | 0      | 0      | 0      | 0      | 0        | 0      |

| GSM342837 | GSM342837 | GSM342837 | GSM342838 | GSM342838 | GSM342839 | GSM342840 | GSM342840 | GSM342840 |
|-----------|-----------|-----------|-----------|-----------|-----------|-----------|-----------|-----------|
| 0         | 0.0597    | 0.0546    | 0.0436    | 0.0911    | 0.0203    | 0.0872    | 0.0867    | 0         |
| 0.3801    | 0.4739    | 0.5068    | 0.5174    | 0.599     | 0.3269    | 0.5053    | 0.4502    | 0.5038    |
| 0.3422    | 0.4696    | 0.4945    | 0.4974    | 0.5766    | 0.3269    | 0.4955    | 0.4159    | 0.4869    |
| 0.1515    | 0.2351    | 0.2626    | 0.2039    | 0.2375    | 0.094     | 0.2025    | 0.2344    | 0.2248    |
| 0.0116    | 0.012     | 0.0139    | 0.0065    | 0         | 0.0178    | 0.0227    | 0.0157    | 0.0182    |
| 0.0029    | 0.0328    | 0         | 0.021     | 0.0714    | 0.0489    | 0.0657    | 0.0539    | 0         |
| 0         | 0.1458    | 0.1567    | 0.1165    | 0.1733    | 0         | 0.1141    | 0.1507    | 0.1115    |
| 0.0524    | 0         | 0.0678    | 0.0196    | 0         | 0.0566    | 0.0301    | 0.0235    | 0.0373    |
| 0         | 0.0992    | 0.0722    | 0.0737    | 0.1175    | 2.00E-04  | 0.0052    | 0.1001    | 0.0545    |
| 0.0603    | 0.0409    | 0.0435    | 0.0153    | 0         | 0.2402    | 0.0758    | 0.0179    | 0.1714    |
| 0.1902    | 0.0938    | 0.2261    | 0.1412    | 0.0851    | 0.1358    | 0.1134    | 0.1035    | 0.1153    |
| 0         | 0.0639    | 0.034     | 0.0405    | 0.0771    | 0.0054    | 0.0448    | 0.0719    | 0.0293    |
| 0         | 0.0041    | 0.0071    | 0         | 0.0182    | 0         | 0.0063    | 0.012     | 0.0211    |
| 0.0288    | 0.0756    | 0.0011    | 0.0111    | 0.0151    | 0         | 0         | 0.0439    | 0         |
| 0.0684    | 0.0089    | 0.0749    | 0         | 0         | 0.0754    | 0.0534    | 0         | 0.0745    |
| 0.0332    | 0         | 0         | 0.022     | 0.0058    | 0.0236    | 0.0198    | 0         | 0.0123    |
| 0.022     | 0.1238    | 0.0646    | 0.0413    | 0.0733    | 0         | 0         | 0.0456    | 0         |
| 0         | 0.0687    | 0.0954    | 0.0288    | 0.064     | 0         | 0.0763    | 0.022     | 0         |
| 0         | 0.1867    | 0.0808    | 0.098     | 0.1277    | 0.0232    | 0.1318    | 0.129     | 0.0603    |
| 0.0095    | 0.0033    | 0.0323    | 0         | 0         | 0.0149    | 0.0165    | 0         | 0.017     |
| 0.03      | 0         | 0.1031    | 0.0467    | 0.0018    | 0.082     | 0.08      | 0         | 0         |
| 0         | 0.1711    | 0.2003    | 0.1217    | 0.2266    | 0         | 0.111     | 0.1693    | 0.1462    |
| 0         | 0.0285    | 0.0012    | 0.0155    | 0.073     | 0         | 0.0574    | 0         | 0.0318    |
| 0.0034    | 0         | 0         | 0         | 0.001     | 0.0018    | 0         | 0         | 0         |
| 0.0216    | 0         | 0.0047    | 0.0052    | 0.0052    | 0.0067    | 0         | 0.0125    | 0         |
| 0         | 0.0149    | 0.0094    | 0         | 0.0029    | 0         | 0.0019    | 0.0029    | 0.0022    |
| 0.0464    | 0.0016    | 0.0184    | 0.0451    | 0.0261    | 0.0499    | 0.0283    | 0.0608    | 0.0336    |
| 0         | 0.0148    | 0.0365    | 0         | 0         | 0         | 0         | 0         | 0         |
| 0.0408    | 0.0581    | 0.0198    | 0         | 0         | 0.032     | 0         | 0         | 0.062     |
| 0         | 0.0114    | 0.0159    | 0.0204    | 0.017     | 0.0239    | 0.0192    | 0.0102    | 0.0018    |
| 0.0354    | 0.0486    | 0.0444    | 0         | 0.0435    | 0.0812    | 0.0553    | 0.0022    | 0.038     |
| 0.0247    | 0.0531    | 0         | 0         | 0.0517    | 0         | 0.006     | 0.0389    | 0.0685    |
| 0.0016    | 0.0309    | 0.053     | 0.1023    | 0.0718    | 0.0086    | 0.0212    | 0.0285    | 0.0131    |
| 0         | 0.0519    | 0.0361    | 0.0487    | 0.0158    | 0         | 0         | 0.0262    | 0         |
| 0.1184    | 0.0049    | 0         | 0.0358    | 1.00E-04  | 0.0695    | 0.0348    | 0         | 0.1033    |
| 0.0379    | 0.0043    | 0.0122    | 0.02      | 0.0224    | 0         | 0.0098    | 0.0344    | 0.017     |
| 0.2576    | 0.0361    | 0.0491    | 0.2791    | 0.1513    | 0.249     | 0.1855    | 0.1122    | 0.2197    |
| 0.0096    | 0.163     | 0.179     | 0.08      | 0.17      | 0.0141    | 0.1318    | 0.0732    | 0.0401    |
| 0         | 0.0706    | 0.0757    | 0.0295    | 0.0901    | 0         | 0.0137    | 0.0642    | 0.0229    |
| 0.0732    | 0.0872    | 0.0509    | 0.0861    | 0.0443    | 0.0534    | 0.0545    | 0.0977    | 0.0986    |
| 0         | 0         | 0         | 0         | 0         | 0         | 0         | 0         | 0         |
| 0         | 0.0054    | 0.0535    | 0         | 0.0011    | 0.0837    | 5.00E-04  | 0.0028    | 0.0064    |
| 0.0196    | 0.0493    | 0.0376    | 0         | 0         | 0         | 0         | 0.0292    | 0.0235    |
| 0.2592    | 0.1329    | 0.092     | 0.1743    | 0.0722    | 0.2379    | 0.0875    | 0.1813    | 0.1857    |
| 0.0113    | 0.0265    | 0.0151    | 0         | 0.0141    | 0         | 0         | 0         | 0.0407    |
| 0.0242    | 0.1189    | 0.0816    | 0.0777    | 0.1128    | 0.0582    | 0.0833    | 0.085     | 0.0749    |
| 0.0328    | 0         | 0         | 0.0201    | 0.0023    | 0         | 0.0027    | 0.0491    | 0         |
| 0.0878    | 0.2431    | 0.194     | 0.1494    | 0.2438    | 0.0794    | 0.1602    | 0.2007    | 0.1632    |
| 0.0551    | 0.0589    | 1.00E-04  | 0.062     | 0.0612    | 0.0148    | 0.0676    | 0.0786    | 0         |



| GSM342841 | GSM342841 | GSM342841 | GSM342842 | GSM342842 | GSM342842 | GSM342843 | GSM342844 | GSM342844 |
|-----------|-----------|-----------|-----------|-----------|-----------|-----------|-----------|-----------|
| 0.0364    | 0.0533    | 0.0046    | 0.036     | 0.1358    | 0.1125    | 0.0068    | 0.0346    | 0.0864    |
| 0.3681    | 0.4843    | 0.4121    | 0.538     | 0.488     | 0.5088    | 0.4604    | 0.4662    | 0.6044    |
| 0.3586    | 0.4215    | 0.4113    | 0.4795    | 0.4488    | 0.5043    | 0.4509    | 0.4461    | 0.5765    |
| 0.1485    | 0.0675    | 0.2221    | 0.1768    | 0.2083    | 0.2382    | 0.2275    | 0.1381    | 0.219     |
| 0.0018    | 0.0221    | 0         | 0.0038    | 0.0155    | 0.0177    | 0.0086    | 0.021     | 0.0217    |
| 0.0685    | 0.025     | 0.0703    | 0.0153    | 0.012     | 0.0395    | 0.0651    | 0.0134    | 0.0248    |
| 0         | 0.1769    | 0.1328    | 0.0926    | 0.0677    | 0.1797    | 0.2177    | 0.1175    | 0.0839    |
| 0.0842    | 0.0625    | 0.0924    | 0.0222    | 0.0136    | 0.0072    | 0.0312    | 0         | 0         |
| 0         | 0         | 0.0384    | 0.0217    | 0.0181    | 0.0654    | 0         | 0.0503    | 0.0012    |
| 0.0672    | 0.0588    | 0         | 0.1006    | 0.0293    | 0.0035    | 0.0733    | 0.0429    | 0.0455    |
| 0.1379    | 0.0593    | 0.2704    | 0.1424    | 0         | 0.1014    | 0.161     | 0.0993    | 0.1479    |
| 1.00E-04  | 0.0359    | 0.0085    | 0.0535    | 0.0913    | 0.07      | 0.0034    | 0         | 0.0155    |
| 0.0026    | 0.0238    | 0.0017    | 0.0338    | 0         | 0         | 0         | 0         | 0         |
| 0         | 0.0277    | 0         | 0.0446    | 0         | 0.0085    | 0         | 0.0095    | 0.0076    |
| 0.0418    | 0         | 0.0314    | 0.0616    | 0.0401    | 0         | 0.0444    | 0.0332    | 0.0291    |
| 0.0275    | 0.0027    | 0         | 0         | 0         | 0         | 0         | 0         | 0         |
| 0.0423    | 0.027     | 0.0368    | 0.075     | 0.0092    | 0.0736    | 0.0658    | 0.0125    | 0.0645    |
| 0.0297    | 0.0274    | 0.0435    | 0.0566    | 0.0929    | 0.1198    | 0         | 0.0306    | 0.1155    |
| 0.0763    | 0.1097    | 0.0572    | 0.0823    | 0.2341    | 0.2098    | 0.1036    | 0.0656    | 0.1127    |
| 0         | 0         | 0         | 0.0118    | 0.0289    | 0.0254    | 0.0219    | 0.0096    | 0.0063    |
| 0         | 0.0368    | 0.0343    | 0         | 0         | 0         | 0.0117    | 0.0321    | 0         |
| 0         | 0.216     | 0.14      | 0.1274    | 0.1551    | 0.2628    | 0.2776    | 0.1406    | 0.1382    |
| 0.0229    | 0.0761    | 0.0756    | 0         | 0         | 0.005     | 0.0797    | 0.0322    | 0.0268    |
| 0.0082    | 0.0014    | 0         | 0         | 0         | 0         | 0         | 0         | 0         |
| 0         | 0.0305    | 0.0111    | 0.0067    | 0.0126    | 0         | 0.0017    | 0.0036    | 0         |
| 0.0133    | 0.0076    | 0.0161    | 0.0086    | 0.0022    | 0.0141    | 0.0169    | 0.0055    | 0.008     |
| 0.0455    | 0.069     | 0.0676    | 0.0258    | 0.0464    | 0.0011    | 0.0348    | 0.0529    | 0.0393    |
| 0         | 0         | 0         | 0         | 0         | 0.0374    | 0.0215    | 0         | 0         |
| 0         | 0.0056    | 0         | 0.0457    | 0.1393    | 0.0963    | 0.0542    | 0.0474    | 0.051     |
| 0.0163    | 0.0202    | 0.0084    | 0.0045    | 0         | 0         | 0.0195    | 0         | 0.0182    |
| 0.053     | 0.0367    | 0         | 0.0515    | 0.123     | 0.0599    | 0.0298    | 0.0103    | 0.0106    |
| 0.0084    | 0.071     | 0.0894    | 0         | 0         | 0.0423    | 0.0575    | 0.0161    | 0.0091    |
| 0.008     | 0.0531    | 0.0256    | 0.0477    | 0         | 1.00E-04  | 0.0363    | 0.0054    | 0.0855    |
| 0.0189    | 0.0596    | 0.0083    | 0.0418    | 0         | 0.0139    | 0.0266    | 0.0084    | 0.0519    |
| 0.0482    | 0.0503    | 0.0663    | 0.0398    | 0         | 0         | 0.0464    | 0.066     | 0         |
| 0.0095    | 0.0628    | 8.00E-04  | 0.0586    | 0.0392    | 0.0044    | 0.0095    | 0.0202    | 0.0278    |
| 0.1813    | 0.0412    | 0.1481    | 0.2257    | 0.0632    | 0         | 0.0713    | 0.1644    | 0.2608    |
| 0.1046    | 0.0477    | 0.0888    | 0.0875    | 0.1174    | 0.1867    | 0.0386    | 0.1388    | 0.161     |
| 0         | 0.1028    | 0.0683    | 0.0311    | 0.0205    | 0.1046    | 0.113     | 0.0403    | 0.0256    |
| 0.0245    | 0.1111    | 0.0056    | 0.0474    | 0.0544    | 0.0579    | 0.0781    | 0.0388    | 0.1094    |
| 0         | 0         | 0         | 0         | 0         | 0         | 0         | 0         | 0         |
| 0.0222    | 0.0065    | 0         | 0.0199    | 0.0495    | 0         | 0.0044    | 0         | 0.0263    |
| 0         | 0.0597    | 0         | 0.0111    | 0.0216    | 0.044     | 0.0095    | 0.0248    | 0         |
| 0.2255    | 0.2491    | 0.3181    | 0.1996    | 0.0236    | 0         | 0.1404    | 0.3158    | 0.1385    |
| 0         | 0         | 0.0033    | 0         | 0.0094    | 0.0379    | 0.0354    | 0.0168    | 0         |
| 0.0725    | 0.0771    | 0.0417    | 0.1095    | 0.1093    | 0.1224    | 0.0921    | 0.0655    | 0.095     |
| 0         | 0.0793    | 0         | 0.0411    | 0.0469    | 0         | 0         | 0.0163    | 0.0408    |
| 0.1465    | 0.1996    | 0.1712    | 0.1535    | 0.2434    | 0.2525    | 0.2103    | 0.1021    | 0.172     |
| 0.1159    | 0.0454    | 0.0726    | 0.0329    | 0.0571    | 0.0768    | 0.0207    | 0.0589    | 0.0157    |





| GSM342844 | GSM342845 | GSM342845 | GSM342846 | GSM342846 | GSM342847 | GSM342847 | GSM342847 | GSM342848 |
|-----------|-----------|-----------|-----------|-----------|-----------|-----------|-----------|-----------|
| 0.0376    | 0.0435    | 0.0948    | 0.0038    | 0         | 0.1168    | 0         | 0.067     | 0.0564    |
| 0.404     | 0.4248    | 0.4817    | 0.4319    | 0.3022    | 0.5635    | 0.3984    | 0.5164    | 0.4389    |
| 0.3904    | 0.388     | 0.4643    | 0.3781    | 0.2907    | 0.5513    | 0.3638    | 0.4972    | 0.4283    |
| 0.2155    | 0.2815    | 0.166     | 0.2295    | 0.1688    | 0.2346    | 0.2725    | 0.2157    | 0.2264    |
| 0.0237    | 0.0151    | 0.0147    | 0.0091    | 0.0214    | 0.0211    | 0.0264    | 0.0084    | 0.0238    |
| 0.0478    | 0.0092    | 0         | 0.0317    | 0.0321    | 0.0024    | 0.0269    | 0         | 0         |
| 0.1677    | 0.0973    | 0.1127    | 0.0746    | 0         | 0.1131    | 0.0409    | 0.1703    | 0.1262    |
| 0.0476    | 0.0242    | 0.0097    | 0.0282    | 0.051     | 0         | 0.0525    | 0.0164    | 0.0407    |
| 0.0448    | 0.0502    | 0.0223    | 0.0379    | 0.0218    | 0.0362    | 0.0349    | 0.0352    | 0.0402    |
| 0.0214    | 0.0212    | 0.0585    | 0.0745    | 0.0752    | 0.0803    | 0.047     | 0         | 0.013     |
| 0.2692    | 0.1116    | 0.1733    | 0.1386    | 0.1642    | 0.1552    | 0.2095    | 0.2769    | 0.1484    |
| 0.0122    | 0.055     | 0.0484    | 0.0163    | 0         | 0.0192    | 0.0274    | 0.0221    | 0.0383    |
| 0         | 0.0148    | 0.0103    | 0.0488    | 0         | 0.007     | 0.0114    | 0.0169    | 0         |
| 0.0016    | 0.0068    | 0         | 0.0133    | 0.014     | 0         | 0         | 0         | 0         |
| 0         | 0.0839    | 0.0291    | 0.0435    | 0.0629    | 0.0138    | 0.0611    | 0.0202    | 0.0274    |
| 0         | 0         | 0         | 0         | 0.0545    | 0.0041    | 0.0028    | 0         | 0.0108    |
| 0.0577    | 0.0494    | 0.0201    | 0.0591    | 0         | 0         | 0.0102    | 0.0568    | 0.0436    |
| 0.0455    | 0.0643    | 0.0667    | 0.0369    | 0.011     | 0.1043    | 0         | 0.089     | 0.0889    |
| 0.089     | 0.1566    | 0.1618    | 0.0759    | 0         | 0.0236    | 0.0147    | 0         | 0.0477    |
| 0         | 0.0348    | 0.0229    | 0.0194    | 0.0193    | 0         | 0.0255    | 0         | 0.0022    |
| 0.0282    | 0         | 0         | 0.0073    | 0.0579    | 0.067     | 0         | 0         | 0         |
| 0.2056    | 0.0723    | 0.154     | 0.1142    | 0         | 0.1649    | 0.0297    | 0.2301    | 0.1516    |
| 0.0492    | 0.0896    | 0.0233    | 0.0071    | 0.0076    | 0.0643    | 0.0457    | 0.044     | 0.0963    |
| 0         | 0         | 0.0074    | 0         | 0.004     | 0         | 0         | 0         | 0         |
| 0.0127    | 0.0044    | 0         | 0.0157    | 0.0188    | 0.0124    | 0.0139    | 0.0025    | 0.0138    |
| 0.0072    | 0.0057    | 0.0135    | 0.0161    | 0         | 0         | 9.00E-04  | 0.0099    | 0         |
| 0.0436    | 0.043     | 0.0527    | 0.0441    | 0.0635    | 0.0466    | 0.056     | 0.0507    | 0.0846    |
| 0.0562    | 0.013     | 0         | 0         | 0         | 0         | 0         | 0.0025    | 0         |
| 0.0618    | 0.022     | 0.0901    | 0.0568    | 0.0548    | 0.0768    | 0.0033    | 0.0368    | 0.0318    |
| 0.0074    | 0.0014    | 0.0048    | 0.0158    | 0.0077    | 0.0192    | 0         | 0         | 0.0084    |
| 0.0278    | 0.0364    | 0.1384    | 0.0192    | 0.0338    | 0.0402    | 0.0132    | 0.0339    | 0.0299    |
| 0.0276    | 0.0561    | 0         | 0.0285    | 0         | 0.0499    | 0.0132    | 0         | 0.0417    |
| 0.031     | 0.001     | 0.0229    | 0.0239    | 0.0201    | 0.0222    | 0.0317    | 0.0267    | 5.00E-04  |
| 0.0168    | 0.0114    | 0.0141    | 0.0126    | 0         | 0         | 0.0175    | 0.025     | 0.0029    |
| 0.0476    | 0.0185    | 0.0304    | 0.0277    | 0.0948    | 0.0437    | 0.0504    | 0.0677    | 0.0615    |
| 0.0136    | 0.0368    | 0.0174    | 0.0538    | 0.0115    | 0.0122    | 0.0346    | 0.0192    | 0.0106    |
| 0.0329    | 0.0557    | 0.1617    | 0.1605    | 0.1889    | 0.2165    | 0.2328    | 0.1108    | 0.1003    |
| 0.1215    | 0.1298    | 0.0948    | 0.0958    | 0.0566    | 0.1128    | 0.0604    | 0.1218    | 0.0944    |
| 0.0826    | 0.034     | 0.0354    | 0.0299    | 0         | 0.0415    | 0         | 0.0951    | 0.0612    |
| 0.0339    | 0.0548    | 0.0522    | 0.0436    | 0         | 0.0818    | 0.0418    | 0.0625    | 0.0682    |
| 0         | 0         | 0         | 0         | 0         | 0         | 0         | 0         | 0         |
| 0         | 0.0125    | 0.0053    | 0.0214    | 0         | 0.0112    | 0         | 0         | 0         |
| 0.0146    | 0.0367    | 0.0015    | 0.0065    | 0.0086    | 0         | 0.0108    | 0.0287    | 0.0132    |
| 0.2268    | 0.132     | 0.1664    | 0.1839    | 0.3919    | 0.2343    | 0.2796    | 0.222     | 0.2501    |
| 0.0298    | 0         | 0.0286    | 0.0113    | 0         | 0.0126    | 0         | 0.0294    | 0.0155    |
| 0.049     | 0.0976    | 0.1286    | 0.0655    | 0         | 0.0483    | 0.0447    | 0.0681    | 0.0411    |
| 0         | 0.0287    | 0         | 0.007     | 0         | 0.0029    | 0.0253    | 0         | 0.0039    |
| 0.1613    | 0.2325    | 0.1656    | 0.1288    | 0.0216    | 0.1789    | 0.1159    | 0.1427    | 0.18      |
| 0.0679    | 0.1277    | 0.0151    | 0.054     | 0.1156    | 0.1139    | 0.0849    | 0.0213    | 0.042     |



| GSM342848 | GSM342849 | GSM342849 | GSM342850 | GSM342850 | GSM342851 | GSM342851 | GSM342851 | GSM342852 |
|-----------|-----------|-----------|-----------|-----------|-----------|-----------|-----------|-----------|
| 0         | 0.0467    | 0.1196    | 0.1014    | 0         | 0         | 0         | 0         | 0.0473    |
| 0.4513    | 0.3117    | 0.6319    | 0.5482    | 0.4072    | 0.4698    | 0.3255    | 0.3416    | 0.4605    |
| 0.4399    | 0.3057    | 0.6117    | 0.5263    | 0.3648    | 0.4514    | 0.3255    | 0.3279    | 0.4347    |
| 0.223     | 0.0972    | 0.2784    | 0.2283    | 0.1429    | 0.2116    | 0.2006    | 0.1319    | 0.2387    |
| 0.0151    | 0.0139    | 0.0022    | 0.0136    | 0.0096    | 0.0224    | 0.0322    | 0.0249    | 0.0066    |
| 0.0358    | 0.0132    | 0         | 0         | 9.00E-04  | 0.0218    | 0         | 0         | 0.0573    |
| 0.0703    | 0         | 0.1505    | 0.1082    | 0.1141    | 0.1121    | 0         | 0.0164    | 0.0806    |
| 0.0387    | 0.0269    | 0         | 0         | 0.0507    | 0         | 0.1122    | 0.0529    | 0.0488    |
| 0.0603    | 0         | 0.1194    | 0.0654    | 0.0482    | 0.0725    | 0         | 0.0074    | 0.051     |
| 0.0604    | 0.0938    | 0.0143    | 0         | 0.0468    | 0.0231    | 0.168     | 0.1429    | 0         |
| 0.3026    | 0.3092    | 0.2591    | 0.2915    | 0.283     | 0.1522    | 0.3529    | 0.134     | 0.1607    |
| 0         | 0         | 0.0354    | 0.0125    | 0.0085    | 0.0469    | 0         | 0.0083    | 0.0256    |
| 0         | 0.0089    | 0.0077    | 0.02      | 0.0031    | 0.0089    | 0         | 0.0128    | 0.0123    |
| 0         | 0         | 0         | 0         | 0.0397    | 0         | 0         | 0.0175    | 0         |
| 0.036     | 0.0857    | 0         | 0.0049    | 0.033     | 0.016     | 0.1045    | 0.0854    | 0.0822    |
| 0         | 0.0173    | 0         | 0         | 0.0151    | 0         | 0         | 0.0443    | 0         |
| 0.0276    | 0         | 0.0387    | 0.0771    | 0.0202    | 0         | 0.0061    | 0         | 0         |
| 0.0218    | 0.0657    | 0.1689    | 0.1758    | 0         | 0.0317    | 0         | 0         | 0.0872    |
| 0         | 0         | 0.0653    | 0.038     | 0         | 0.093     | 0         | 4.00E-04  | 0.0631    |
| 0         | 0.0103    | 0         | 0         | 0         | 0.0109    | 0.0278    | 0.0132    | 0.0063    |
| 0.002     | 0.044     | 0         | 0.0592    | 0         | 0         | 0         | 0.039     | 0.0275    |
| 0.0881    | 0.0054    | 0.1611    | 0.1394    | 0.1131    | 0.1672    | 0         | 0.0469    | 0.0951    |
| 0.0431    | 0         | 0.0789    | 0.098     | 0.0023    | 0.0258    | 0         | 0         | 0.0585    |
| 0         | 0         | 0         | 0         | 0         | 0         | 0         | 0         | 0         |
| 0.0058    | 0.0199    | 0.0029    | 0.018     | 0.0253    | 0.0095    | 0.0329    | 0.0103    | 3.00E-04  |
| 0         | 0         | 0         | 0.0044    | 0.0109    | 0.0047    | 0         | 0         | 0.0048    |
| 0.0663    | 0.0506    | 0.0441    | 0.0628    | 0.074     | 0.0601    | 0.0554    | 0.0561    | 0.0622    |
| 0         | 0         | 0         | 0         | 0         | 0         | 0.0121    | 0         | 0         |
| 0.0145    | 0.0775    | 0.0219    | 0.0399    | 0         | 0.1019    | 0.0582    | 0.0475    | 0.0225    |
| 0.0159    | 0.0134    | 0.0112    | 0.0133    | 0.0129    | 0.014     | 0         | 0         | 0.0156    |
| 0         | 0.0452    | 0.0609    | 0.0165    | 0         | 0.0959    | 0         | 0.0699    | 0.0219    |
| 0.0245    | 0         | 0.0734    | 0         | 0.0587    | 0.0568    | 0         | 0         | 0.0063    |
| 0.029     | 0         | 0.0876    | 0.0618    | 0.0387    | 0.0129    | 0.0012    | 0         | 0.0238    |
| 0.0013    | 0         | 0.0336    | 0.0549    | 0.0297    | 0.0142    | 0.0069    | 0         | 0.0026    |
| 0.0574    | 0.072     | 0         | 0.0114    | 0.1       | 0.0236    | 0.0985    | 0.0911    | 0.0568    |
| 0.0114    | 0.006     | 0.0202    | 0.0218    | 0.0424    | 0.0184    | 0         | 0.0137    | 0.0258    |
| 0.2855    | 0.1778    | 0.2011    | 0.1598    | 0.1748    | 0.1833    | 0.2595    | 0.256     | 0.1805    |
| 0.0964    | 0.037     | 0.1919    | 0.1672    | 0.0057    | 0.0783    | 0         | 0         | 0.0924    |
| 0.0419    | 0         | 0.0567    | 0.0465    | 0.0603    | 0.0269    | 0         | 0         | 0.024     |
| 0.0106    | 0         | 0.0068    | 0.0348    | 0.0943    | 0.0702    | 0         | 0.0124    | 0         |
| 0         | 0         | 0         | 0         | 0         | 0         | 0.0188    | 0         | 0         |
| 0         | 0         | 0         | 0         | 0         | 0         | 0.0296    | 0.0539    | 0.0098    |
| 0         | 0.0013    | 0.0173    | 0.0396    | 0.018     | 0.0465    | 0.0303    | 0.0217    | 0.0102    |
| 0.3154    | 0.2202    | 0.1086    | 0.1267    | 0.2753    | 0.1434    | 0.3043    | 0.2268    | 0.2708    |
| 0.0126    | 0.029     | 0.0131    | 0.024     | 0.0249    | 0.0187    | 0.012     | 0.0374    | 0         |
| 0.0464    | 0         | 0.0827    | 0.0802    | 0.0197    | 0.0765    | 0.0116    | 0.0614    | 0.0691    |
| 0         | 0         | 0         | 0         | 0.0333    | 0.0253    | 0         | 0         | 0         |
| 0.0594    | 0.0043    | 0.2294    | 0.1607    | 0.1017    | 0.2209    | 0         | 0.0648    | 0.1216    |
| 0.0242    | 0.1966    | 0.073     | 0.0076    | 0.1432    | 0.1425    | 0         | 0         | 0.093     |



GSM342852GSM342853GSM342853GSM342853GSM342854GSM342854GSM342854GSM342855GSM342855

|        |          |          |        |        |          |        |        |        |
|--------|----------|----------|--------|--------|----------|--------|--------|--------|
| 0.0688 | 0.0494   | 0.1536   | 0.0957 | 0      | 0        | 0      | 0.117  | 0.111  |
| 0.3083 | 0.4867   | 0.5226   | 0.4361 | 0.3287 | 0.479    | 0.475  | 0.5324 | 0.4423 |
| 0.3083 | 0.4779   | 0.4835   | 0.4217 | 0.3219 | 0.4524   | 0.4399 | 0.4955 | 0.4205 |
| 0.0968 | 0.2403   | 0.2714   | 0.1945 | 0.081  | 0.1535   | 0.1479 | 0.1891 | 0.1337 |
| 0.0193 | 0.0084   | 0        | 0.0165 | 0.0229 | 0.0248   | 0.0016 | 0.0132 | 0.0023 |
| 0.0261 | 0.0577   | 0.0415   | 0      | 0.048  | 0.084    | 0.0423 | 0.0342 | 0.0697 |
| 0      | 0.201    | 0.1093   | 0.1065 | 0.1789 | 0.2033   | 0.0431 | 0.1366 | 0      |
| 0.0645 | 0.0319   | 0        | 0.1136 | 0.0185 | 0        | 0.0415 | 0.0168 | 0.0617 |
| 0.0138 | 0.0326   | 0.0653   | 0.0104 | 0.0186 | 0.1298   | 0.0369 | 0.0269 | 0.091  |
| 0.1432 | 0        | 0.0208   | 0.054  | 0      | 0.0027   | 0.0329 | 0.0405 | 0      |
| 0.1289 | 0.1077   | 0.0408   | 0.1586 | 0.1138 | 0.08     | 0      | 0.0214 | 0.0989 |
| 0      | 0.0386   | 0.0703   | 0.0115 | 0.0417 | 0.0727   | 0.0661 | 0.0751 | 0.0815 |
| 0      | 0        | 0.0121   | 0      | 0      | 0.0021   | 0.0259 | 0      | 0.0084 |
| 0      | 0.0064   | 0        | 0.0172 | 0.0743 | 0.0313   | 0.0335 | 0.0062 | 0.0701 |
| 0.0236 | 0.0042   | 0.0246   | 0.0669 | 0.0319 | 0        | 0.0538 | 0.0093 | 0      |
| 0.0492 | 0        | 0        | 0.0258 | 0.0741 | 0        | 0.0484 | 0      | 0      |
| 0      | 0.0508   | 0.0976   | 0.0383 | 0.0272 | 0.0088   | 0.03   | 0.0074 | 0.0788 |
| 0.0468 | 0.0279   | 0.1414   | 0.0228 | 0      | 0        | 0      | 0.0586 | 0.0876 |
| 0      | 0.152    | 0.1678   | 0.1233 | 0.093  | 0.1624   | 0.157  | 0.1796 | 0.2161 |
| 0      | 0.0035   | 0.0024   | 0.0311 | 0.0089 | 0.0118   | 0      | 0.0173 | 0      |
| 0.0786 | 0.0158   | 0        | 0.0454 | 0.0188 | 0        | 0      | 0.1028 | 0      |
| 0      | 0.2237   | 0.1363   | 0.1641 | 0.2432 | 0.2546   | 0.0647 | 0.1554 | 0      |
| 0      | 0.0803   | 0.0778   | 0      | 0.0877 | 0.0431   | 0.0131 | 0.0175 | 0.0155 |
| 0.0034 | 0        | 0        | 0      | 0.0089 | 0        | 0.0122 | 0.0041 | 0.0128 |
| 0.0285 | 0        | 0        | 0.0192 | 0.0235 | 0.0051   | 0.003  | 0.0014 | 0      |
| 0      | 0        | 0        | 0.0061 | 0.0012 | 0.0158   | 0      | 0.0057 | 0.014  |
| 0.0426 | 0.03     | 0.0293   | 0.054  | 0.0597 | 0.0358   | 0.041  | 0.049  | 0.0233 |
| 0      | 0        | 0        | 0.0011 | 0      | 6.00E-04 | 0      | 0      | 0      |
| 0      | 0        | 0.0775   | 0.0724 | 0.0412 | 0.0212   | 0      | 0.0719 | 0      |
| 0.0136 | 9.00E-04 | 0        | 0.0052 | 0.0029 | 0.0191   | 0.007  | 0.0179 | 0.0252 |
| 0.0667 | 0.0301   | 0.0701   | 0.0462 | 0.0191 | 0.0076   | 0.057  | 0.0598 | 0.0127 |
| 0      | 0        | 0.0513   | 0      | 0.0164 | 0.1104   | 0      | 0      | 0.0711 |
| 0      | 0.0311   | 0.028    | 0      | 0.0089 | 0        | 0      | 0.0053 | 0.0536 |
| 0      | 0.0305   | 0.0346   | 0.0049 | 0.0167 | 0.0083   | 0      | 0.0259 | 0.0592 |
| 0.1082 | 0.0223   | 0.0045   | 0.0252 | 0.0661 | 0.0142   | 0.0435 | 0      | 0      |
| 0      | 0.0088   | 0.039    | 0.0144 | 0.0068 | 0.0266   | 0.035  | 0.0369 | 0.0218 |
| 0.1883 | 0.1554   | 0.0596   | 0.1081 | 0      | 0        | 0.247  | 0.1348 | 0.066  |
| 0.0318 | 0.0808   | 0.1623   | 0.064  | 0.05   | 0.1577   | 0.0958 | 0.1051 | 0.1359 |
| 0      | 0.0828   | 0.0413   | 0.0425 | 0.1046 | 0.1121   | 0.0081 | 0.0309 | 0      |
| 0.0244 | 0.0914   | 0.0273   | 0.0837 | 0.051  | 0.0768   | 0.0751 | 0.0919 | 0.0563 |
| 0      | 0        | 0        | 0      | 0      | 0        | 0      | 0      | 0      |
| 0.0045 | 0        | 0.0015   | 0.0286 | 0      | 0.0416   | 0.0131 | 0.0399 | 0      |
| 0.0118 | 0        | 0.0101   | 0.0492 | 0.0279 | 0.0575   | 0      | 0.0252 | 0.0541 |
| 0.2921 | 0.1496   | 0.1334   | 0.1282 | 0.278  | 0.0736   | 0.1212 | 0      | 0      |
| 0.0385 | 0.016    | 7.00E-04 | 0.0271 | 0.0364 | 0.0184   | 0      | 0      | 0      |
| 0.0138 | 0.0948   | 0.1028   | 0.0927 | 0.0509 | 0.0815   | 0.0776 | 0.0896 | 0.1202 |
| 0      | 0        | 0.0368   | 0.0063 | 0      | 0.051    | 0.0157 | 0.0374 | 0.0352 |
| 0.0158 | 0.2159   | 0.2332   | 0.1282 | 0.135  | 0.2677   | 0.1966 | 0.2456 | 0.312  |
| 0.0485 | 0.0231   | 0.0866   | 0      | 0.0862 | 0.142    | 0.0364 | 0.0633 | 0.1572 |



GSM342856GSM342856GSM342857GSM342857GSM342858GSM342858GSM342859GSM342859GSM342860

|        |        |        |        |        |        |          |        |        |
|--------|--------|--------|--------|--------|--------|----------|--------|--------|
| 0.0992 | 0      | 0.062  | 0.0727 | 0.0595 | 0.092  | 0.0115   | 0.0731 | 0.0852 |
| 0.4706 | 0.5026 | 0.4157 | 0.4402 | 0.5135 | 0.3532 | 0.3766   | 0.4325 | 0.4534 |
| 0.4284 | 0.4589 | 0.3823 | 0.4048 | 0.4734 | 0.3389 | 0.3633   | 0.429  | 0.4383 |
| 0.1815 | 0.2288 | 0.1864 | 0.1977 | 0.1913 | 0      | 0.1346   | 0.2225 | 0.2087 |
| 0.0166 | 0.0018 | 0.0029 | 0.0079 | 0.0188 | 0.0142 | 0.0172   | 0.0325 | 0      |
| 0.0066 | 0.0421 | 0.0387 | 0.0382 | 0.0238 | 0.0242 | 0.0408   | 0.0049 | 0.0396 |
| 0.1788 | 0.1032 | 0.1025 | 0.1303 | 0.1666 | 0.0221 | 0.107    | 0.1867 | 0.1498 |
| 0.0746 | 0.0059 | 0.0337 | 0.0692 | 0      | 0.0151 | 0.0543   | 0.0722 | 0.0042 |
| 0      | 0.0263 | 0.0214 | 0.0343 | 0.0767 | 0      | 0.018    | 0.0804 | 0.0125 |
| 0      | 0.0249 | 0.0241 | 0      | 0      | 0.1924 | 0.0161   | 0      | 0.0294 |
| 0.0443 | 0.0186 | 0.1394 | 0.1838 | 0.0609 | 0      | 0.1047   | 0.286  | 0      |
| 0.0604 | 0.0666 | 0.0436 | 0.065  | 0.0688 | 0.0289 | 0.0048   | 0.0434 | 0.0459 |
| 0      | 0.0286 | 0      | 0      | 0.03   | 0.0287 | 0.0032   | 0      | 0.0016 |
| 0.0316 | 0.0515 | 0.0356 | 0      | 0.034  | 0      | 0.0301   | 0.0083 | 0      |
| 0.0661 | 0.0102 | 0.0326 | 0.0414 | 0      | 0.0562 | 0.0401   | 0.0455 | 0.0564 |
| 0      | 0      | 0      | 0      | 0      | 0.0231 | 0.1181   | 0.0187 | 0.0255 |
| 0.0838 | 0.0455 | 0.0547 | 0.0856 | 0.041  | 0      | 0.0017   | 0.0202 | 0.0039 |
| 0.0658 | 0      | 0.0393 | 0.0486 | 0.0556 | 0.0763 | 0.0043   | 0.0414 | 0.0445 |
| 0.1688 | 0.1476 | 0.0911 | 0.1167 | 0.1901 | 0.0907 | 0        | 0.0568 | 0.0851 |
| 0.0389 | 0      | 0.0116 | 0      | 0.0098 | 0.0268 | 0.0127   | 0.0265 | 0.0112 |
| 0.0157 | 0.0128 | 0      | 0      | 0      | 0.0842 | 0.1425   | 0.071  | 0.018  |
| 0.2264 | 0.1215 | 0.1278 | 0.1428 | 0.1969 | 0.0064 | 0.1183   | 0.2284 | 0.1587 |
| 0      | 0.0323 | 0.0449 | 0.0337 | 0.0194 | 0      | 0.0517   | 0.0087 | 0      |
| 0      | 0      | 0      | 0.0011 | 0      | 0      | 0.0013   | 0      | 0      |
| 0      | 0.0208 | 0.0071 | 0.0025 | 0.0032 | 0.0054 | 0.0241   | 0.0165 | 0      |
| 0.0033 | 0      | 0      | 0.0062 | 0.013  | 0.0039 | 0.0045   | 0      | 0      |
| 0.0398 | 0.0697 | 0.0229 | 0.0328 | 0.0298 | 0.0375 | 0.0425   | 0.057  | 0.0316 |
| 0.0344 | 0      | 0.0056 | 0      | 0.0284 | 0      | 0        | 0.0272 | 0      |
| 0.0671 | 0      | 0.0181 | 0.047  | 0.0338 | 0.0669 | 0        | 0      | 0.0014 |
| 0.0202 | 0.0252 | 0.0058 | 0      | 0.002  | 0.0144 | 0.0103   | 0.0082 | 0.0076 |
| 0.0616 | 0.0401 | 0.0578 | 0.0356 | 0.073  | 0.1467 | 0.023    | 0.0046 | 0.0532 |
| 0      | 0.0752 | 0.0382 | 0.024  | 0.0215 | 0      | 0        | 0      | 0      |
| 0.0055 | 0.0469 | 0.0304 | 0.025  | 0      | 0      | 0.0187   | 0.0092 | 0      |
| 0.0384 | 0.0299 | 0.0178 | 0.0203 | 0.0284 | 0      | 0        | 0.0154 | 0      |
| 0      | 0.0555 | 0.0469 | 0.0415 | 0.0212 | 0.0646 | 0.0863   | 0.0069 | 0.0732 |
| 0.0422 | 0.0438 | 0.0334 | 0.0354 | 0.0402 | 0.0144 | 0.0133   | 0.0035 | 0.015  |
| 0.0163 | 0.2349 | 0.1281 | 0.0135 | 0.0664 | 0.128  | 0.1375   | 0.0729 | 0.1709 |
| 0.0674 | 0.0496 | 0.049  | 0.0977 | 0.1438 | 0.0571 | 0.0639   | 0.0869 | 0.0436 |
| 0.0764 | 0.035  | 0.0343 | 0.0339 | 0.0726 | 0      | 0.0278   | 0.1016 | 0.0452 |
| 0.0373 | 0.1088 | 0.0577 | 0.1247 | 0.0932 | 0.0015 | 0.0514   | 0.0159 | 0.0473 |
| 0      | 0      | 0      | 0      | 0      | 0      | 0        | 0      | 0      |
| 0.028  | 0.0456 | 0.0071 | 0      | 0.0114 | 0.0621 | 0        | 0      | 0.0241 |
| 0.0547 | 0.0081 | 0      | 0.0063 | 0.0356 | 0.0148 | 0        | 0.0435 | 0      |
| 0.1399 | 0.1214 | 0.2249 | 0.1066 | 0.0348 | 0.0822 | 0.209    | 0.2126 | 0.2165 |
| 0.0306 | 0      | 0.0248 | 0      | 0.0126 | 0.0302 | 0        | 0      | 0.0297 |
| 0.0806 | 0.0777 | 0.1043 | 0.1073 | 0.1113 | 0.0599 | 0.0509   | 0.08   | 0.0506 |
| 0.0425 | 0.0315 | 0.0667 | 0.0233 | 0.0044 | 0      | 0        | 0      | 0      |
| 0.1602 | 0.2246 | 0.1794 | 0.2507 | 0.2484 | 0.1485 | 0.1298   | 0.1306 | 0.1209 |
| 0.0691 | 0.0481 | 0.0973 | 0      | 0.0678 | 0.1098 | 2.00E-04 | 0.0366 | 0      |





| GSM34286C | GSM34286I | GSM34286I | GSM34283I |
|-----------|-----------|-----------|-----------|-----------|-----------|-----------|-----------|-----------|-----------|
| 0         | 0.0475    | 0.1029    | 0.049     | 0.1043    | 0.0595    | 0.1458    | 0.0667    | 0.0796    |           |
| 0.2632    | 0.4399    | 0.5051    | 0.5073    | 0.6089    | 0.5642    | 0.5986    | 0.5401    | 0.4904    |           |
| 0.2434    | 0.4399    | 0.4877    | 0.4811    | 0.5873    | 0.5472    | 0.5843    | 0.5178    | 0.4396    |           |
| 0         | 0.12      | 0.2381    | 0.2643    | 0.2874    | 0.2985    | 0.2836    | 0.3041    | 0.2291    |           |
| 0.014     | 0.0309    | 0.0127    | 0.012     | 0.0076    | 0         | 0         | 0         | 0.01      |           |
| 0         | 0         | 0.0416    | 0.0166    | 0         | 0.0691    | 0         | 0.0032    | 0.0583    |           |
| 0         | 0.082     | 0.1452    | 0.1301    | 0.1498    | 0.1399    | 0.1764    | 0.097     | 0.1559    |           |
| 0.0655    | 0.0068    | 0.0158    | 0.0258    | 0.0238    | 0.0252    | 0.0119    | 0.0373    | 0         |           |
| 0         | 0.0269    | 0.1124    | 0.0785    | 0.0664    | 0.0983    | 0.0654    | 0.0834    | 0.0235    |           |
| 0.0609    | 0.1947    | 0         | 0         | 0         | 0.025     | 0         | 0.0248    | 0.0175    |           |
| 0.006     | 0.1779    | 0.0879    | 0.1523    | 0.2023    | 0.1322    | 0.1895    | 0.2046    | 0.0014    |           |
| 0         | 0         | 0.1066    | 0.0289    | 0.0229    | 0.0319    | 0.0274    | 0.0303    | 0.0661    |           |
| 0         | 0         | 0.0033    | 0.0099    | 0.0121    | 0         | 0.0107    | 0.0323    | 0.0192    |           |
| 0         | 0         | 0.024     | 0         | 0         | 0         | 0         | 0         | 0.0159    |           |
| 0.0378    | 0.0525    | 0         | 0.0122    | 0.0317    | 0.033     | 0.0114    | 0.0467    | 0.0177    |           |
| 0.099     | 0.0473    | 0.026     | 0         | 0         | 0.0017    | 0         | 0.0156    | 0         |           |
| 0         | 0         | 0         | 0.046     | 0.0537    | 0.0515    | 0.1052    | 0.0268    | 0.0597    |           |
| 0         | 0.0456    | 0.1206    | 0.056     | 0.086     | 0.0326    | 0.1119    | 0.0811    | 0.0229    |           |
| 0.1071    | 0         | 0.1817    | 0.0707    | 0.0602    | 0.0705    | 0.0979    | 0.0432    | 0.1217    |           |
| 0         | 0.0205    | 0.0037    | 0         | 0.002     | 0.0043    | 0.0013    | 0.0039    | 0         |           |
| 0.135     | 0.131     | 0         | 0         | 0         | 0.019     | 0.0249    | 0.0419    | 0.0181    |           |
| 0.0373    | 0.13      | 0.1565    | 0.1434    | 0.1962    | 0.1598    | 0.1946    | 0.1079    | 0.1579    |           |
| 0.0251    | 0.0306    | 0.074     | 0.0381    | 0.0678    | 0.0368    | 0.0746    | 0.0796    | 0.0435    |           |
| 0         | 0         | 0         | 0         | 0         | 0         | 0         | 0         | 0.0112    |           |
| 0.0311    | 0.0161    | 0.0131    | 0.0176    | 0.0064    | 0         | 0.0206    | 0         | 0         |           |
| 0         | 0         | 0         | 0         | 0.0128    | 0.0046    | 0.005     | 0         | 0         |           |
| 0.0914    | 0.0685    | 0.0169    | 0.0517    | 0.0518    | 0.0244    | 0.0305    | 0.0404    | 0.0365    |           |
| 0         | 0         | 0.0084    | 0         | 0         | 0         | 0.0089    | 0         | 0         |           |
| 0.0564    | 0         | 0.0403    | 0.0394    | 0.037     | 0         | 0.0043    | 0.0071    | 0.0409    |           |
| 0         | 0.0174    | 0.0021    | 0         | 0         | 0.013     | 0.0111    | 0.0111    | 0.0205    |           |
| 0.0796    | 0.0106    | 0.0512    | 0.0052    | 0.0573    | 0.0409    | 0.0161    | 0         | 0.0214    |           |
| 0         | 0         | 0.0349    | 0.0304    | 0.0359    | 0.0509    | 0.0297    | 0.0042    | 0         |           |
| 1.00E-04  | 0         | 0.0454    | 0.0401    | 0.0525    | 0.0409    | 0.0294    | 0.0428    | 0         |           |
| 0         | 0         | 0.0042    | 0.0106    | 0.0256    | 0.0224    | 0.0385    | 0.0073    | 0.0179    |           |
| 0.0924    | 0.0744    | 0         | 0.0451    | 0.0341    | 0.0129    | 0.0511    | 0.0354    | 0.063     |           |
| 0.0198    | 0         | 0.0174    | 0.0262    | 0.0216    | 0.017     | 0.0142    | 0.0224    | 0.0508    |           |
| 0.1976    | 0.1833    | 0.0662    | 0.241     | 0.2047    | 0.2424    | 0.1349    | 0.3036    | 0.1451    |           |
| 0         | 0.0739    | 0.1766    | 0.1149    | 0.1167    | 0.1286    | 0.1445    | 0.0879    | 0.0566    |           |
| 0         | 0.0195    | 0.044     | 0.0269    | 0.0514    | 0.0387    | 0.0805    | 0.0206    | 0.0438    |           |
| 0.0364    | 0.0676    | 0.1074    | 0.0095    | 0.0664    | 0.0275    | 0.0734    | 0.0478    | 0.0401    |           |
| 0         | 0         | 0         | 0         | 0         | 0         | 0         | 0         | 0         |           |
| 0         | 0.0452    | 0         | 0         | 0         | 0.0205    | 0         | 0.0214    | 0         |           |
| 0         | 0.0117    | 0.0016    | 0         | 0         | 0         | 0.0352    | 0         | 0         |           |
| 0.3402    | 0.3283    | 0.018     | 0.2607    | 0.1305    | 0.1365    | 0.1179    | 0.2186    | 0.2631    |           |
| 0.0036    | 0.0354    | 0.0125    | 0.0136    | 0.0475    | 0.0316    | 0.0333    | 0         | 0.0081    |           |
| 0.0187    | 0.0425    | 0.0956    | 0.0739    | 0.0694    | 0.0686    | 0.0955    | 0.0626    | 0.0762    |           |
| 0         | 0         | 0.013     | 0.0047    | 0         | 0.001     | 0         | 0         | 0.0363    |           |
| 0.0185    | 0.0947    | 0.3059    | 0.1215    | 0.2006    | 0.1803    | 0.1909    | 0.1305    | 0.1376    |           |
| 0.0775    | 0         | 0.0188    | 0.0439    | 0.0363    | 0.0492    | 0.0176    | 0.0482    | 0.1052    |           |



| GSM342831 | GSM342831 | GSM342831 | GSM342831 | GSM342832 | GSM342832 | GSM342832 | GSM342832 | GSM342832 |
|-----------|-----------|-----------|-----------|-----------|-----------|-----------|-----------|-----------|
| 0.1437    | 0.1689    | 0.0878    | 0.1414    | 0.1556    | 0.0619    | 0.1063    | 0.1577    | 0.1542    |
| 0.5122    | 0.5564    | 0.5583    | 0.6058    | 0.502     | 0.553     | 0.5117    | 0.584     | 0.5278    |
| 0.4917    | 0.5064    | 0.53      | 0.605     | 0.4775    | 0.5267    | 0.4926    | 0.5547    | 0.5055    |
| 0.218     | 0.2444    | 0.2247    | 0.1895    | 0.2745    | 0.2494    | 0.2212    | 0.2491    | 0.2734    |
| 0.0052    | 0.0045    | 0.0035    | 0.0054    | 0         | 0.0036    | 0.0117    | 0.0075    | 0.0078    |
| 0.0789    | 0.0462    | 0.0862    | 0.0979    | 0.0456    | 0.0741    | 0.0506    | 0.0581    | 0.0609    |
| 0.1391    | 0.1698    | 0.175     | 0.118     | 0.1388    | 0.1624    | 0.1613    | 0.1954    | 0.1765    |
| 0.0035    | 0.033     | 0         | 0         | 0         | 0         | 0         | 0         | 0         |
| 0.0581    | 0         | 0.0772    | 0.068     | 0.0798    | 0.0696    | 0.0894    | 0.079     | 0.0525    |
| 0         | 0         | 0.0328    | 0.0197    | 0.0072    | 0         | 0.012     | 0         | 0.011     |
| 0         | 0.0063    | 0         | 0.055     | 0.0715    | 0.0643    | 0.1425    | 0         | 0.0377    |
| 0.074     | 0.0508    | 0.0816    | 0.0525    | 0.0505    | 0.0375    | 0.0485    | 0.0811    | 0.0552    |
| 0.0125    | 0.0342    | 0.0329    | 0.0016    | 0.0096    | 0.0251    | 0.0158    | 0         | 0.0114    |
| 0.035     | 0         | 0         | 0         | 0         | 0         | 0         | 0         | 0         |
| 0.0029    | 0.0535    | 0.0285    | 0.0042    | 0.0233    | 0.0336    | 0         | 0.0065    | 0.033     |
| 0         | 0.0092    | 0         | 0         | 0         | 0         | 0         | 0         | 0         |
| 0.0679    | 0.0965    | 0.0334    | 0.0087    | 0.1113    | 0.0625    | 0.0483    | 0.0637    | 0.0516    |
| 0.0836    | 0.0773    | 0.0398    | 0.0828    | 0.0934    | 0.0618    | 0.0791    | 0.0778    | 0.1228    |
| 0.1858    | 0.1566    | 0.1951    | 0.1252    | 0.1754    | 0.1157    | 0.1073    | 0.1874    | 0.1617    |
| 0         | 0.019     | 0.0024    | 0         | 0         | 0.0403    | 0         | 0         | 0.0125    |
| 0         | 0         | 0         | 0         | 0         | 0         | 0.0105    | 0         | 0         |
| 0.1284    | 0.1818    | 0.1768    | 0.1184    | 0.1954    | 0.1833    | 0.1879    | 0.2413    | 0.1802    |
| 0.038     | 0.0469    | 0.038     | 0.0275    | 0.0485    | 0.0494    | 0.0068    | 0.0564    | 0.0132    |
| 0.0088    | 0.0045    | 0.0058    | 0.0052    | 0.0019    | 0         | 0.0014    | 0.0056    | 0.0035    |
| 0         | 0         | 0         | 0         | 0.01      | 0.0017    | 0.0168    | 0         | 0         |
| 0         | 0.0091    | 0         | 0         | 0.0021    | 0         | 0         | 0         | 9.00E-04  |
| 0.0318    | 0.0221    | 0.0386    | 0.0327    | 0.0358    | 0.0486    | 0.0476    | 0.0359    | 0.036     |
| 0         | 0         | 0         | 0         | 0.0011    | 0         | 0         | 0.0033    | 0         |
| 0.0185    | 0.0175    | 0.0121    | 0.0092    | 0.0363    | 0.016     | 0.0379    | 0.0592    | 0.0369    |
| 0.0147    | 0.0054    | 0.0235    | 0.013     | 0.013     | 0.0254    | 0.0281    | 0.0114    | 0.0143    |
| 0.0461    | 0.0264    | 0.0392    | 0.0472    | 0.0241    | 0.0299    | 0         | 0.0655    | 0.0304    |
| 0         | 0         | 8.00E-04  | 0         | 0         | 0         | 0.0108    | 0         | 0.0049    |
| 0.034     | 0.0568    | 0.0197    | 0.0559    | 0.0358    | 0.014     | 0.0154    | 0.0077    | 0.0432    |
| 0.0537    | 0.0585    | 0.0131    | 0.0351    | 0.0328    | 0.061     | 0.0098    | 0.0253    | 0.022     |
| 0.0083    | 0.0634    | 0.0267    | 0.0498    | 0.0109    | 0.0229    | 0         | 0.0133    | 0.019     |
| 0.0206    | 0.05      | 0.0283    | 8.00E-04  | 0.0245    | 0.0263    | 0.0191    | 0.0294    | 0.0223    |
| 0.1637    | 0.0877    | 0.1706    | 0.2757    | 0.0734    | 0.1884    | 0.1755    | 0.0989    | 0.1077    |
| 0.0947    | 0.0424    | 0.1206    | 0.1427    | 0.0989    | 0.11      | 0.1147    | 0.1336    | 0.1189    |
| 0.0299    | 0.0794    | 0.0566    | 0.0196    | 0.0764    | 0.0612    | 0.0707    | 0.0725    | 0.0455    |
| 0.0364    | 0.0176    | 0.0507    | 0.0215    | 0.0228    | 0.0597    | 0.0658    | 0.0485    | 0.0273    |
| 0         | 0.0297    | 0         | 0         | 0         | 0         | 0         | 0         | 0         |
| 0.0021    | 0         | 0.0129    | 0         | 0.0173    | 0.0201    | 0.0115    | 0.0142    | 0         |
| 0         | 0         | 0         | 0.0394    | 0.0095    | 0.0905    | 0.0081    | 0         | 0         |
| 0.0716    | 0.1992    | 0.0956    | 0.0963    | 0.195     | 0.2319    | 0.1924    | 0.0945    | 0.1119    |
| 0.022     | 9.00E-04  | 0.0096    | 0.0085    | 0.0275    | 0.0115    | 0.0273    | 0.0244    | 0.0373    |
| 0.0937    | 0.1012    | 0.0893    | 0.0777    | 0.1061    | 0.0473    | 0.0762    | 0.095     | 0.0903    |
| 0.023     | 0.0345    | 0.0086    | 0         | 0.0269    | 7.00E-04  | 0.0051    | 0.0466    | 0.0202    |
| 0.2036    | 0.1386    | 0.2024    | 0.1821    | 0.1614    | 0.1345    | 0.1589    | 0.2077    | 0.1736    |
| 0.1009    | 0         | 0.0906    | 0.0657    | 0.065     | 0.0726    | 0.1167    | 0.0456    | 0.1343    |



| GSM342832 | GSM342832 | GSM342832 | GSM342832 | GSM342832 | case        | control              |
|-----------|-----------|-----------|-----------|-----------|-------------|----------------------|
| 0.1652    | 0.0975    | 0.1139    | 0.0881    | 0.1338    | 0.049404688 | 0.043778448 0.114045 |
| 0.5776    | 0.545     | 0.5552    | 0.5015    | 0.5322    | 0.44559375  | 0.08230126 0.54661   |
| 0.528     | 0.4983    | 0.5409    | 0.4795    | 0.4952    | 0.424535938 | 0.077757091 0.519465 |
| 0.2222    | 0.2488    | 0.2285    | 0.2672    | 0.2363    | 0.188332813 | 0.061635416 0.25071  |
| 0.0079    | 0.0126    | 0.003     | 0.0125    | 0.0113    | 0.01436875  | 0.0082931 0.006305   |
| 0.064     | 0.0626    | 0.0691    | 0.0383    | 0.0444    | 0.027471875 | 0.023756566 0.051205 |
| 0.1908    | 0.1586    | 0.1368    | 0.1288    | 0.1434    | 0.100865625 | 0.06132184 0.15219   |
| 0         | 0         | 0         | 0.0272    | 0.002     | 0.034075    | 0.02966077 0.009485  |
| 0.0985    | 0.0988    | 0.0626    | 0.0902    | 0.0777    | 0.039682813 | 0.036342308 0.070845 |
| 0         | 0         | 0.0188    | 0.0078    | 0.0032    | 0.053776563 | 0.062214908 0.00899  |
| 0.0089    | 0.0012    | 0.0576    | 0.2668    | 0.0812    | 0.1480375   | 0.089630202 0.083765 |
| 0.0698    | 0.0775    | 0.0419    | 0.0211    | 0.0618    | 0.033735938 | 0.026518872 0.050565 |
| 0.0205    | 0.0169    | 0.0159    | 0.005     | 0.0183    | 0.00814375  | 0.010941038 0.015195 |
| 0.0078    | 0.007     | 0.004     | 0         | 0         | 0.0154625   | 0.020482734 0.003485 |
| 0.0041    | 0.0402    | 0.0185    | 0.0128    | 0         | 0.037923438 | 0.029292947 0.02069  |
| 0         | 0         | 0         | 0         | 0         | 0.016346875 | 0.027806171 0.001325 |
| 0.0297    | 0.0813    | 0.0397    | 0.0496    | 0.0297    | 0.036617188 | 0.032823088 0.05584  |
| 0.0908    | 0.0512    | 0.0573    | 0.0632    | 0.0662    | 0.048225    | 0.04328688 0.07188   |
| 0.1589    | 0.1533    | 0.1248    | 0         | 0.1337    | 0.085034375 | 0.065567351 0.122255 |
| 0         | 0.0017    | 0         | 0.0104    | 0         | 0.011290625 | 0.011326409 0.00489  |
| 0         | 0         | 0         | 0.0603    | 0         | 0.029626563 | 0.040766724 0.008735 |
| 0.2022    | 0.1692    | 0.1263    | 0.1456    | 0.1381    | 0.127478125 | 0.077258501 0.166735 |
| 0.0703    | 0.0574    | 0.0427    | 0.0545    | 0.0614    | 0.03306875  | 0.031496127 0.04757  |
| 0.01      | 0         | 0.0011    | 0         | 0.0043    | 0.001448438 | 0.003398645 0.003165 |
| 0.0044    | 0.0048    | 0         | 0.0227    | 0         | 0.00983125  | 0.009630571 0.00525  |
| 0.0055    | 0         | 0         | 0         | 0.0031    | 0.004621875 | 0.005357815 0.002155 |
| 0.0282    | 0.0328    | 0.0484    | 0.0745    | 0.0287    | 0.046610938 | 0.017877929 0.03885  |
| 0         | 0         | 0         | 0         | 0         | 0.005645313 | 0.012208388 0.000665 |
| 0.0124    | 0.0143    | 0.0072    | 0.0339    | 0.0381    | 0.037484375 | 0.03253431 0.02391   |
| 0         | 0.0141    | 0.0193    | 0.0139    | 0.0187    | 0.009846875 | 0.008160006 0.013525 |
| 0.0316    | 0.0103    | 0.0363    | 0         | 0.0433    | 0.041978125 | 0.032307159 0.02856  |
| 0.0514    | 0.0097    | 4.00E-04  | 0.0192    | 0.0267    | 0.026754688 | 0.031900256 0.01375  |
| 0.0612    | 0.0141    | 0.0835    | 0.0239    | 0.0266    | 0.02393125  | 0.025649851 0.034875 |
| 0.0396    | 0.0172    | 0.0345    | 0.0026    | 0         | 0.018445313 | 0.019248541 0.026375 |
| 0.0153    | 0.0271    | 0.0272    | 0.0334    | 0.0425    | 0.043176563 | 0.034609737 0.03007  |
| 0.0496    | 0.0466    | 0.0143    | 0.022     | 0.037     | 0.021059375 | 0.015499408 0.02715  |
| 0.1302    | 0.0923    | 0.2872    | 0.2248    | 0.1484    | 0.1460625   | 0.081190922 0.17481  |
| 0.0939    | 0.1119    | 0.0731    | 0.0843    | 0.099     | 0.08881875  | 0.051768115 0.104395 |
| 0.0785    | 0.0608    | 0.0268    | 0.0571    | 0.0363    | 0.041264063 | 0.034290317 0.05166  |
| 0.0309    | 0.0533    | 0.0689    | 0.0339    | 0.0736    | 0.053275    | 0.032480935 0.04378  |
| 0         | 0         | 0         | 0         | 0         | 0.00029375  | 0.00235 0.001485     |
| 0         | 0         | 0.0405    | 0.0027    | 0.0075    | 0.014523438 | 0.021048921 0.008535 |
| 0.0315    | 0.0351    | 0.0023    | 0         | 0         | 0.018704688 | 0.018608331 0.01258  |
| 0.1085    | 0.0775    | 0.1579    | 0.2995    | 0.09      | 0.18490625  | 0.094960316 0.157455 |
| 0.0109    | 0.035     | 0.022     | 0.0188    | 0.0304    | 0.01646875  | 0.015450884 0.02101  |
| 0.0682    | 0.0938    | 0.0813    | 0.0493    | 0.072     | 0.071607813 | 0.03190988 0.07938   |
| 0.0504    | 0.0544    | 0.0118    | 0.0267    | 0.0346    | 0.014123438 | 0.02017693 0.019275  |
| 0.2065    | 0.2476    | 0.1638    | 0.1338    | 0.2151    | 0.158370313 | 0.073699367 0.17455  |
| 0.0821    | 0.0884    | 0.0312    | 0.104     | 0.1091    | 0.060323438 | 0.047695312 0.07033  |

|        |        |          |          |        |             |             |          |
|--------|--------|----------|----------|--------|-------------|-------------|----------|
| 0.1415 | 0.178  | 0.1113   | 0.1137   | 0.1623 | 0.115348438 | 0.059788824 | 0.127055 |
| 0.007  | 0.0995 | 0.1095   | 0.0677   | 0.0602 | 0.084290625 | 0.08856768  | 0.070145 |
| 0.1801 | 0.1606 | 0.1646   | 0.1911   | 0.1496 | 0.1696375   | 0.056101033 | 0.178375 |
| 0.0664 | 0.0846 | 0.0454   | 0.0467   | 0.0625 | 0.059184375 | 0.041438412 | 0.06538  |
| 0.1344 | 0.0833 | 0.1303   | 0.0467   | 0.1093 | 0.108425    | 0.053427355 | 0.099775 |
| 0.0482 | 0.0291 | 0.0577   | 0.0579   | 0.0609 | 0.054535938 | 0.029823318 | 0.05094  |
| 0      | 0      | 0        | 0        | 0.0628 | 0.009178125 | 0.020013983 | 0.007175 |
| 0.0927 | 0.0724 | 0.0935   | 0.0398   | 0.0683 | 0.073520313 | 0.033309125 | 0.07009  |
| 0.0069 | 0.02   | 0.0155   | 0        | 0.0125 | 0.007842188 | 0.014700651 | 0.00663  |
| 0.0983 | 0.0908 | 0.0904   | 0.1168   | 0.0922 | 0.113520313 | 0.048738421 | 0.116635 |
| 0.0059 | 0.0033 | 0        | 4.00E-04 | 0      | 0.001785938 | 0.002844201 | 0.0016   |
| 0.0501 | 0.0333 | 0.0204   | 0.0694   | 0.0325 | 0.048335938 | 0.029756324 | 0.047165 |
| 0      | 0      | 0.007    | 0.0196   | 0.0032 | 0.005110938 | 0.005430955 | 0.00492  |
| 0.0205 | 0.0182 | 0.0067   | 0.028    | 0.0104 | 0.0090875   | 0.010937535 | 0.008985 |
| 0.004  | 0.0055 | 0.0019   | 0.0041   | 0.0032 | 0.002326563 | 0.001772474 | 0.00231  |
| 0.0185 | 0.0193 | 0.0322   | 0.038    | 0.0246 | 0.028901563 | 0.015954981 | 0.028835 |
| 0.0284 | 0.022  | 9.00E-04 | 0.0124   | 0.0212 | 0.019851563 | 0.015286273 | 0.01984  |
| 0      | 0      | 0        | 0        | 0      | 0           | 0           | 0        |

0.039095719 7.72E-08  
0.036157825 9.05E-07  
0.041633859 1.35E-06  
0.030342066 3.88E-05  
0.004451194 7.97E-05  
0.027945181 0.000343  
0.024792718 0.000478  
0.013466929 0.000576  
0.024447397 0.000577  
0.010600839 0.002004  
0.084058985 0.005702  
0.019975914 0.010715  
0.010219356 0.012506  
0.008462753 0.012983  
0.016137465 0.014121  
0.003945534 0.018724  
0.026665874 0.01954  
0.024863598 0.022772  
0.052737827 0.023254  
0.009785322 0.025594  
0.016677381 0.028705  
0.033530619 0.030527  
0.01888528 0.054887  
0.003644358 0.056034  
0.007835983 0.056536  
0.003590994 0.057786  
0.012140298 0.073735  
0.002083336 0.07414  
0.016215843 0.076786  
0.007934195 0.080313  
0.019139306 0.08232  
0.017593794 0.086036  
0.020696678 0.086104  
0.0177707 0.105594  
0.018071702 0.108817  
0.013410699 0.117802  
0.069651228 0.157524  
0.026645479 0.20086  
0.02072363 0.203647  
0.019854407 0.220657  
0.006641122 0.224913  
0.011081244 0.227028  
0.023172048 0.229776  
0.069848358 0.236032  
0.012898262 0.23753  
0.016209309 0.29917  
0.018612386 0.313406  
0.034767748 0.346695  
0.03599911 0.390576



0.026853021 0.399672  
0.037726432 0.49052  
0.025193209 0.502562  
0.016616973 0.517329  
0.061107514 0.543168  
0.016055312 0.607975  
0.016058278 0.684415  
0.040198113 0.703227  
0.008942865 0.728504  
0.02633953 0.785659  
0.002128751 0.788387  
0.027204668 0.875931  
0.006130304 0.894457  
0.00923137 0.969887  
0.001669195 0.970603  
0.012159479 0.986367  
0.012212608 0.997546  
0 #DIV/0!
